# Supplementary material for: Enabling QALY estimation in mental health trials and care settings: mapping from the PHQ-9 and GAD-7 to the ReQoL-UI or EQ-5D-5L using mixture models
Source: Qual Life Res. 2023 Jun 14;32(10):2763–78. doi: 10.1007/s11136-023-03443-9 (PMC10474206; doi:10.1007/s11136-023-03443-9)
Supplement: Supplementary file 2 — Supplementary file2 (XLS 24634 KB) [file 11136_2023_3443_MOESM2_ESM.xlsx]

## Sheet: R
PHQ9	GAD7	age	sex	R6
0	0	18	Female	0.941781
0	0	18	Male	0.943873
0	0	19	Female	0.941276
0	0	19	Male	0.943412
0	0	20	Female	0.94077
0	0	20	Male	0.94295
0	0	21	Female	0.940261
0	0	21	Male	0.942486
0	0	22	Female	0.939751
0	0	22	Male	0.94202
0	0	23	Female	0.93924
0	0	23	Male	0.941553
0	0	24	Female	0.938727
0	0	24	Male	0.941084
0	0	25	Female	0.938212
0	0	25	Male	0.940614
0	0	26	Female	0.937695
0	0	26	Male	0.940142
0	0	27	Female	0.937177
0	0	27	Male	0.939669
0	0	28	Female	0.936657
0	0	28	Male	0.939194
0	0	29	Female	0.936135
0	0	29	Male	0.938718
0	0	30	Female	0.935612
0	0	30	Male	0.93824
0	0	31	Female	0.935088
0	0	31	Male	0.937761
0	0	32	Female	0.934562
0	0	32	Male	0.93728
0	0	33	Female	0.934034
0	0	33	Male	0.936798
0	0	34	Female	0.933505
0	0	34	Male	0.936314
0	0	35	Female	0.932975
0	0	35	Male	0.935829
0	0	36	Female	0.932443
0	0	36	Male	0.935343
0	0	37	Female	0.93191
0	0	37	Male	0.934855
0	0	38	Female	0.931375
0	0	38	Male	0.934366
0	0	39	Female	0.930839
0	0	39	Male	0.933876
0	0	40	Female	0.930302
0	0	40	Male	0.933384
0	0	41	Female	0.929763
0	0	41	Male	0.932891
0	0	42	Female	0.929223
0	0	42	Male	0.932397
0	0	43	Female	0.928681
0	0	43	Male	0.931901
0	0	44	Female	0.928139
0	0	44	Male	0.931404
0	0	45	Female	0.927595
0	0	45	Male	0.930906
0	0	46	Female	0.92705
0	0	46	Male	0.930407
0	0	47	Female	0.926504
0	0	47	Male	0.929906
0	0	48	Female	0.925956
0	0	48	Male	0.929404
0	0	49	Female	0.925407
0	0	49	Male	0.928902
0	0	50	Female	0.924858
0	0	50	Male	0.928397
0	0	51	Female	0.924307
0	0	51	Male	0.927892
0	0	52	Female	0.923755
0	0	52	Male	0.927386
0	0	53	Female	0.923202
0	0	53	Male	0.926879
0	0	54	Female	0.922647
0	0	54	Male	0.92637
0	0	55	Female	0.922092
0	0	55	Male	0.92586
0	0	56	Female	0.921536
0	0	56	Male	0.92535
0	0	57	Female	0.920979
0	0	57	Male	0.924838
0	0	58	Female	0.92042
0	0	58	Male	0.924325
0	0	59	Female	0.919861
0	0	59	Male	0.923812
0	0	60	Female	0.919301
0	0	60	Male	0.923297
0	0	61	Female	0.91874
0	0	61	Male	0.922781
0	0	62	Female	0.918178
0	0	62	Male	0.922265
0	0	63	Female	0.917615
0	0	63	Male	0.921747
0	0	64	Female	0.917051
0	0	64	Male	0.921228
0	0	65	Female	0.916486
0	0	65	Male	0.920709
0	0	66	Female	0.91592
0	0	66	Male	0.920189
0	0	67	Female	0.915354
0	0	67	Male	0.919667
0	0	68	Female	0.914787
0	0	68	Male	0.919145
0	0	69	Female	0.914219
0	0	69	Male	0.918622
0	0	70	Female	0.91365
0	0	70	Male	0.918098
0	0	71	Female	0.91308
0	0	71	Male	0.917574
0	0	72	Female	0.91251
0	0	72	Male	0.917048
0	0	73	Female	0.911939
0	0	73	Male	0.916522
0	0	74	Female	0.911367
0	0	74	Male	0.915995
0	0	75	Female	0.910794
0	0	75	Male	0.915467
0	0	76	Female	0.910221
0	0	76	Male	0.914938
0	0	77	Female	0.909647
0	0	77	Male	0.914409
0	0	78	Female	0.909072
0	0	78	Male	0.913879
0	0	79	Female	0.908497
0	0	79	Male	0.913348
0	0	80	Female	0.907921
0	0	80	Male	0.912817
0	0	81	Female	0.907345
0	0	81	Male	0.912284
0	0	82	Female	0.906768
0	0	82	Male	0.911751
0	0	83	Female	0.90619
0	0	83	Male	0.911218
0	0	84	Female	0.905612
0	0	84	Male	0.910684
0	0	85	Female	0.905033
0	0	85	Male	0.910149
0	0	86	Female	0.904454
0	0	86	Male	0.909613
0	0	87	Female	0.903874
0	0	87	Male	0.909077
0	0	88	Female	0.903293
0	0	88	Male	0.908541
0	0	89	Female	0.902712
0	0	89	Male	0.908003
0	0	90	Female	0.902131
0	0	90	Male	0.907465
0	0	91	Female	0.901549
0	0	91	Male	0.906927
0	0	92	Female	0.900966
0	0	92	Male	0.906388
0	0	93	Female	0.900384
0	0	93	Male	0.905849
0	0	94	Female	0.8998
0	0	94	Male	0.905309
0	0	95	Female	0.899216
0	0	95	Male	0.904768
0	0	96	Female	0.898632
0	0	96	Male	0.904227
0	0	97	Female	0.898047
0	0	97	Male	0.903685
0	0	98	Female	0.897462
0	0	98	Male	0.903143
0	0	99	Female	0.896877
0	0	99	Male	0.902601
0	1	18	Female	0.939654
0	1	18	Male	0.941414
0	1	19	Female	0.93914
0	1	19	Male	0.940943
0	1	20	Female	0.938625
0	1	20	Male	0.940472
0	1	21	Female	0.938109
0	1	21	Male	0.939998
0	1	22	Female	0.93759
0	1	22	Male	0.939523
0	1	23	Female	0.93707
0	1	23	Male	0.939047
0	1	24	Female	0.936548
0	1	24	Male	0.938569
0	1	25	Female	0.936025
0	1	25	Male	0.938089
0	1	26	Female	0.9355
0	1	26	Male	0.937608
0	1	27	Female	0.934974
0	1	27	Male	0.937126
0	1	28	Female	0.934446
0	1	28	Male	0.936642
0	1	29	Female	0.933917
0	1	29	Male	0.936156
0	1	30	Female	0.933386
0	1	30	Male	0.935669
0	1	31	Female	0.932853
0	1	31	Male	0.935181
0	1	32	Female	0.932319
0	1	32	Male	0.934692
0	1	33	Female	0.931784
0	1	33	Male	0.934201
0	1	34	Female	0.931247
0	1	34	Male	0.933708
0	1	35	Female	0.930709
0	1	35	Male	0.933214
0	1	36	Female	0.93017
0	1	36	Male	0.932719
0	1	37	Female	0.929629
0	1	37	Male	0.932223
0	1	38	Female	0.929087
0	1	38	Male	0.931725
0	1	39	Female	0.928543
0	1	39	Male	0.931226
0	1	40	Female	0.927998
0	1	40	Male	0.930726
0	1	41	Female	0.927452
0	1	41	Male	0.930225
0	1	42	Female	0.926905
0	1	42	Male	0.929722
0	1	43	Female	0.926357
0	1	43	Male	0.929218
0	1	44	Female	0.925807
0	1	44	Male	0.928713
0	1	45	Female	0.925256
0	1	45	Male	0.928207
0	1	46	Female	0.924704
0	1	46	Male	0.927699
0	1	47	Female	0.924151
0	1	47	Male	0.92719
0	1	48	Female	0.923596
0	1	48	Male	0.926681
0	1	49	Female	0.923041
0	1	49	Male	0.92617
0	1	50	Female	0.922484
0	1	50	Male	0.925658
0	1	51	Female	0.921927
0	1	51	Male	0.925145
0	1	52	Female	0.921368
0	1	52	Male	0.924631
0	1	53	Female	0.920808
0	1	53	Male	0.924115
0	1	54	Female	0.920248
0	1	54	Male	0.923599
0	1	55	Female	0.919686
0	1	55	Male	0.923082
0	1	56	Female	0.919123
0	1	56	Male	0.922564
0	1	57	Female	0.91856
0	1	57	Male	0.922044
0	1	58	Female	0.917995
0	1	58	Male	0.921524
0	1	59	Female	0.917429
0	1	59	Male	0.921003
0	1	60	Female	0.916863
0	1	60	Male	0.920481
0	1	61	Female	0.916296
0	1	61	Male	0.919958
0	1	62	Female	0.915728
0	1	62	Male	0.919434
0	1	63	Female	0.915158
0	1	63	Male	0.918909
0	1	64	Female	0.914589
0	1	64	Male	0.918383
0	1	65	Female	0.914018
0	1	65	Male	0.917856
0	1	66	Female	0.913446
0	1	66	Male	0.917329
0	1	67	Female	0.912874
0	1	67	Male	0.916801
0	1	68	Female	0.912301
0	1	68	Male	0.916271
0	1	69	Female	0.911727
0	1	69	Male	0.915741
0	1	70	Female	0.911153
0	1	70	Male	0.915211
0	1	71	Female	0.910577
0	1	71	Male	0.914679
0	1	72	Female	0.910001
0	1	72	Male	0.914147
0	1	73	Female	0.909425
0	1	73	Male	0.913614
0	1	74	Female	0.908847
0	1	74	Male	0.91308
0	1	75	Female	0.908269
0	1	75	Male	0.912545
0	1	76	Female	0.907691
0	1	76	Male	0.91201
0	1	77	Female	0.907111
0	1	77	Male	0.911474
0	1	78	Female	0.906531
0	1	78	Male	0.910937
0	1	79	Female	0.905951
0	1	79	Male	0.9104
0	1	80	Female	0.90537
0	1	80	Male	0.909862
0	1	81	Female	0.904788
0	1	81	Male	0.909324
0	1	82	Female	0.904206
0	1	82	Male	0.908784
0	1	83	Female	0.903623
0	1	83	Male	0.908244
0	1	84	Female	0.903039
0	1	84	Male	0.907704
0	1	85	Female	0.902455
0	1	85	Male	0.907163
0	1	86	Female	0.901871
0	1	86	Male	0.906621
0	1	87	Female	0.901286
0	1	87	Male	0.906079
0	1	88	Female	0.900701
0	1	88	Male	0.905536
0	1	89	Female	0.900115
0	1	89	Male	0.904993
0	1	90	Female	0.899528
0	1	90	Male	0.904449
0	1	91	Female	0.898942
0	1	91	Male	0.903904
0	1	92	Female	0.898354
0	1	92	Male	0.903359
0	1	93	Female	0.897767
0	1	93	Male	0.902814
0	1	94	Female	0.897179
0	1	94	Male	0.902268
0	1	95	Female	0.89659
0	1	95	Male	0.901721
0	1	96	Female	0.896001
0	1	96	Male	0.901175
0	1	97	Female	0.895412
0	1	97	Male	0.900627
0	1	98	Female	0.894822
0	1	98	Male	0.900079
0	1	99	Female	0.894232
0	1	99	Male	0.899531
0	2	18	Female	0.937462
0	2	18	Male	0.938887
0	2	19	Female	0.93694
0	2	19	Male	0.938408
0	2	20	Female	0.936416
0	2	20	Male	0.937926
0	2	21	Female	0.935891
0	2	21	Male	0.937443
0	2	22	Female	0.935364
0	2	22	Male	0.936959
0	2	23	Female	0.934836
0	2	23	Male	0.936473
0	2	24	Female	0.934306
0	2	24	Male	0.935986
0	2	25	Female	0.933774
0	2	25	Male	0.935497
0	2	26	Female	0.933241
0	2	26	Male	0.935007
0	2	27	Female	0.932707
0	2	27	Male	0.934515
0	2	28	Female	0.932171
0	2	28	Male	0.934022
0	2	29	Female	0.931633
0	2	29	Male	0.933528
0	2	30	Female	0.931094
0	2	30	Male	0.933032
0	2	31	Female	0.930554
0	2	31	Male	0.932535
0	2	32	Female	0.930012
0	2	32	Male	0.932036
0	2	33	Female	0.929469
0	2	33	Male	0.931536
0	2	34	Female	0.928925
0	2	34	Male	0.931035
0	2	35	Female	0.928379
0	2	35	Male	0.930533
0	2	36	Female	0.927832
0	2	36	Male	0.930029
0	2	37	Female	0.927284
0	2	37	Male	0.929524
0	2	38	Female	0.926734
0	2	38	Male	0.929018
0	2	39	Female	0.926183
0	2	39	Male	0.92851
0	2	40	Female	0.925631
0	2	40	Male	0.928002
0	2	41	Female	0.925078
0	2	41	Male	0.927492
0	2	42	Female	0.924523
0	2	42	Male	0.926981
0	2	43	Female	0.923968
0	2	43	Male	0.926469
0	2	44	Female	0.923411
0	2	44	Male	0.925955
0	2	45	Female	0.922853
0	2	45	Male	0.925441
0	2	46	Female	0.922294
0	2	46	Male	0.924925
0	2	47	Female	0.921734
0	2	47	Male	0.924408
0	2	48	Female	0.921172
0	2	48	Male	0.923891
0	2	49	Female	0.92061
0	2	49	Male	0.923372
0	2	50	Female	0.920047
0	2	50	Male	0.922852
0	2	51	Female	0.919483
0	2	51	Male	0.922331
0	2	52	Female	0.918917
0	2	52	Male	0.921809
0	2	53	Female	0.918351
0	2	53	Male	0.921286
0	2	54	Female	0.917784
0	2	54	Male	0.920762
0	2	55	Female	0.917215
0	2	55	Male	0.920237
0	2	56	Female	0.916646
0	2	56	Male	0.919711
0	2	57	Female	0.916076
0	2	57	Male	0.919184
0	2	58	Female	0.915505
0	2	58	Male	0.918657
0	2	59	Female	0.914933
0	2	59	Male	0.918128
0	2	60	Female	0.914361
0	2	60	Male	0.917598
0	2	61	Female	0.913787
0	2	61	Male	0.917068
0	2	62	Female	0.913213
0	2	62	Male	0.916537
0	2	63	Female	0.912638
0	2	63	Male	0.916005
0	2	64	Female	0.912062
0	2	64	Male	0.915472
0	2	65	Female	0.911485
0	2	65	Male	0.914938
0	2	66	Female	0.910908
0	2	66	Male	0.914403
0	2	67	Female	0.91033
0	2	67	Male	0.913868
0	2	68	Female	0.909751
0	2	68	Male	0.913332
0	2	69	Female	0.909171
0	2	69	Male	0.912795
0	2	70	Female	0.908591
0	2	70	Male	0.912257
0	2	71	Female	0.90801
0	2	71	Male	0.911718
0	2	72	Female	0.907428
0	2	72	Male	0.911179
0	2	73	Female	0.906846
0	2	73	Male	0.910639
0	2	74	Female	0.906263
0	2	74	Male	0.910099
0	2	75	Female	0.905679
0	2	75	Male	0.909558
0	2	76	Female	0.905095
0	2	76	Male	0.909016
0	2	77	Female	0.90451
0	2	77	Male	0.908473
0	2	78	Female	0.903925
0	2	78	Male	0.90793
0	2	79	Female	0.903339
0	2	79	Male	0.907386
0	2	80	Female	0.902753
0	2	80	Male	0.906842
0	2	81	Female	0.902166
0	2	81	Male	0.906297
0	2	82	Female	0.901578
0	2	82	Male	0.905751
0	2	83	Female	0.90099
0	2	83	Male	0.905205
0	2	84	Female	0.900401
0	2	84	Male	0.904658
0	2	85	Female	0.899812
0	2	85	Male	0.90411
0	2	86	Female	0.899223
0	2	86	Male	0.903562
0	2	87	Female	0.898633
0	2	87	Male	0.903014
0	2	88	Female	0.898042
0	2	88	Male	0.902465
0	2	89	Female	0.897452
0	2	89	Male	0.901915
0	2	90	Female	0.89686
0	2	90	Male	0.901365
0	2	91	Female	0.896268
0	2	91	Male	0.900815
0	2	92	Female	0.895676
0	2	92	Male	0.900264
0	2	93	Female	0.895084
0	2	93	Male	0.899713
0	2	94	Female	0.894491
0	2	94	Male	0.899161
0	2	95	Female	0.893897
0	2	95	Male	0.898608
0	2	96	Female	0.893304
0	2	96	Male	0.898055
0	2	97	Female	0.89271
0	2	97	Male	0.897502
0	2	98	Female	0.892115
0	2	98	Male	0.896949
0	2	99	Female	0.89152
0	2	99	Male	0.896395
0	3	18	Female	0.935203
0	3	18	Male	0.936291
0	3	19	Female	0.934672
0	3	19	Male	0.935802
0	3	20	Female	0.93414
0	3	20	Male	0.935311
0	3	21	Female	0.933606
0	3	21	Male	0.934819
0	3	22	Female	0.933071
0	3	22	Male	0.934325
0	3	23	Female	0.932534
0	3	23	Male	0.93383
0	3	24	Female	0.931996
0	3	24	Male	0.933333
0	3	25	Female	0.931456
0	3	25	Male	0.932835
0	3	26	Female	0.930915
0	3	26	Male	0.932336
0	3	27	Female	0.930372
0	3	27	Male	0.931835
0	3	28	Female	0.929828
0	3	28	Male	0.931333
0	3	29	Female	0.929283
0	3	29	Male	0.93083
0	3	30	Female	0.928736
0	3	30	Male	0.930325
0	3	31	Female	0.928188
0	3	31	Male	0.929819
0	3	32	Female	0.927638
0	3	32	Male	0.929311
0	3	33	Female	0.927087
0	3	33	Male	0.928803
0	3	34	Female	0.926535
0	3	34	Male	0.928293
0	3	35	Female	0.925982
0	3	35	Male	0.927782
0	3	36	Female	0.925427
0	3	36	Male	0.927269
0	3	37	Female	0.924871
0	3	37	Male	0.926756
0	3	38	Female	0.924314
0	3	38	Male	0.926241
0	3	39	Female	0.923756
0	3	39	Male	0.925725
0	3	40	Female	0.923196
0	3	40	Male	0.925208
0	3	41	Female	0.922636
0	3	41	Male	0.92469
0	3	42	Female	0.922074
0	3	42	Male	0.92417
0	3	43	Female	0.921511
0	3	43	Male	0.92365
0	3	44	Female	0.920947
0	3	44	Male	0.923128
0	3	45	Female	0.920382
0	3	45	Male	0.922605
0	3	46	Female	0.919816
0	3	46	Male	0.922082
0	3	47	Female	0.919249
0	3	47	Male	0.921557
0	3	48	Female	0.918681
0	3	48	Male	0.921031
0	3	49	Female	0.918112
0	3	49	Male	0.920504
0	3	50	Female	0.917542
0	3	50	Male	0.919976
0	3	51	Female	0.916971
0	3	51	Male	0.919448
0	3	52	Female	0.916399
0	3	52	Male	0.918918
0	3	53	Female	0.915826
0	3	53	Male	0.918387
0	3	54	Female	0.915252
0	3	54	Male	0.917855
0	3	55	Female	0.914677
0	3	55	Male	0.917323
0	3	56	Female	0.914102
0	3	56	Male	0.916789
0	3	57	Female	0.913525
0	3	57	Male	0.916255
0	3	58	Female	0.912948
0	3	58	Male	0.91572
0	3	59	Female	0.91237
0	3	59	Male	0.915184
0	3	60	Female	0.911791
0	3	60	Male	0.914647
0	3	61	Female	0.911211
0	3	61	Male	0.914109
0	3	62	Female	0.910631
0	3	62	Male	0.91357
0	3	63	Female	0.910049
0	3	63	Male	0.913031
0	3	64	Female	0.909467
0	3	64	Male	0.912491
0	3	65	Female	0.908885
0	3	65	Male	0.91195
0	3	66	Female	0.908301
0	3	66	Male	0.911408
0	3	67	Female	0.907717
0	3	67	Male	0.910865
0	3	68	Female	0.907132
0	3	68	Male	0.910322
0	3	69	Female	0.906547
0	3	69	Male	0.909778
0	3	70	Female	0.905961
0	3	70	Male	0.909234
0	3	71	Female	0.905374
0	3	71	Male	0.908688
0	3	72	Female	0.904787
0	3	72	Male	0.908142
0	3	73	Female	0.904199
0	3	73	Male	0.907596
0	3	74	Female	0.90361
0	3	74	Male	0.907048
0	3	75	Female	0.903021
0	3	75	Male	0.9065
0	3	76	Female	0.902431
0	3	76	Male	0.905952
0	3	77	Female	0.901841
0	3	77	Male	0.905402
0	3	78	Female	0.90125
0	3	78	Male	0.904853
0	3	79	Female	0.900659
0	3	79	Male	0.904302
0	3	80	Female	0.900067
0	3	80	Male	0.903751
0	3	81	Female	0.899474
0	3	81	Male	0.9032
0	3	82	Female	0.898882
0	3	82	Male	0.902647
0	3	83	Female	0.898288
0	3	83	Male	0.902095
0	3	84	Female	0.897694
0	3	84	Male	0.901542
0	3	85	Female	0.8971
0	3	85	Male	0.900988
0	3	86	Female	0.896505
0	3	86	Male	0.900434
0	3	87	Female	0.89591
0	3	87	Male	0.899879
0	3	88	Female	0.895315
0	3	88	Male	0.899324
0	3	89	Female	0.894719
0	3	89	Male	0.898768
0	3	90	Female	0.894122
0	3	90	Male	0.898212
0	3	91	Female	0.893525
0	3	91	Male	0.897655
0	3	92	Female	0.892928
0	3	92	Male	0.897098
0	3	93	Female	0.892331
0	3	93	Male	0.896541
0	3	94	Female	0.891733
0	3	94	Male	0.895983
0	3	95	Female	0.891135
0	3	95	Male	0.895424
0	3	96	Female	0.890536
0	3	96	Male	0.894865
0	3	97	Female	0.889937
0	3	97	Male	0.894306
0	3	98	Female	0.889338
0	3	98	Male	0.893747
0	3	99	Female	0.888738
0	3	99	Male	0.893187
0	4	18	Female	0.932873
0	4	18	Male	0.933623
0	4	19	Female	0.932334
0	4	19	Male	0.933124
0	4	20	Female	0.931793
0	4	20	Male	0.932624
0	4	21	Female	0.931251
0	4	21	Male	0.932122
0	4	22	Female	0.930707
0	4	22	Male	0.931619
0	4	23	Female	0.930162
0	4	23	Male	0.931114
0	4	24	Female	0.929615
0	4	24	Male	0.930608
0	4	25	Female	0.929067
0	4	25	Male	0.930101
0	4	26	Female	0.928518
0	4	26	Male	0.929593
0	4	27	Female	0.927967
0	4	27	Male	0.929083
0	4	28	Female	0.927415
0	4	28	Male	0.928571
0	4	29	Female	0.926861
0	4	29	Male	0.928059
0	4	30	Female	0.926307
0	4	30	Male	0.927545
0	4	31	Female	0.92575
0	4	31	Male	0.92703
0	4	32	Female	0.925193
0	4	32	Male	0.926514
0	4	33	Female	0.924634
0	4	33	Male	0.925996
0	4	34	Female	0.924075
0	4	34	Male	0.925478
0	4	35	Female	0.923513
0	4	35	Male	0.924958
0	4	36	Female	0.922951
0	4	36	Male	0.924437
0	4	37	Female	0.922388
0	4	37	Male	0.923915
0	4	38	Female	0.921823
0	4	38	Male	0.923391
0	4	39	Female	0.921257
0	4	39	Male	0.922867
0	4	40	Female	0.920691
0	4	40	Male	0.922341
0	4	41	Female	0.920123
0	4	41	Male	0.921815
0	4	42	Female	0.919554
0	4	42	Male	0.921287
0	4	43	Female	0.918984
0	4	43	Male	0.920758
0	4	44	Female	0.918413
0	4	44	Male	0.920228
0	4	45	Female	0.91784
0	4	45	Male	0.919697
0	4	46	Female	0.917267
0	4	46	Male	0.919166
0	4	47	Female	0.916693
0	4	47	Male	0.918633
0	4	48	Female	0.916118
0	4	48	Male	0.918099
0	4	49	Female	0.915542
0	4	49	Male	0.917564
0	4	50	Female	0.914965
0	4	50	Male	0.917028
0	4	51	Female	0.914387
0	4	51	Male	0.916492
0	4	52	Female	0.913809
0	4	52	Male	0.915954
0	4	53	Female	0.913229
0	4	53	Male	0.915416
0	4	54	Female	0.912649
0	4	54	Male	0.914876
0	4	55	Female	0.912067
0	4	55	Male	0.914336
0	4	56	Female	0.911485
0	4	56	Male	0.913795
0	4	57	Female	0.910902
0	4	57	Male	0.913253
0	4	58	Female	0.910319
0	4	58	Male	0.91271
0	4	59	Female	0.909734
0	4	59	Male	0.912166
0	4	60	Female	0.909149
0	4	60	Male	0.911622
0	4	61	Female	0.908563
0	4	61	Male	0.911077
0	4	62	Female	0.907976
0	4	62	Male	0.910531
0	4	63	Female	0.907389
0	4	63	Male	0.909984
0	4	64	Female	0.906801
0	4	64	Male	0.909437
0	4	65	Female	0.906212
0	4	65	Male	0.908888
0	4	66	Female	0.905623
0	4	66	Male	0.908339
0	4	67	Female	0.905032
0	4	67	Male	0.90779
0	4	68	Female	0.904442
0	4	68	Male	0.907239
0	4	69	Female	0.90385
0	4	69	Male	0.906689
0	4	70	Female	0.903258
0	4	70	Male	0.906137
0	4	71	Female	0.902666
0	4	71	Male	0.905585
0	4	72	Female	0.902073
0	4	72	Male	0.905032
0	4	73	Female	0.901479
0	4	73	Male	0.904478
0	4	74	Female	0.900885
0	4	74	Male	0.903924
0	4	75	Female	0.90029
0	4	75	Male	0.903369
0	4	76	Female	0.899694
0	4	76	Male	0.902814
0	4	77	Female	0.899099
0	4	77	Male	0.902258
0	4	78	Female	0.898502
0	4	78	Male	0.901701
0	4	79	Female	0.897905
0	4	79	Male	0.901144
0	4	80	Female	0.897308
0	4	80	Male	0.900587
0	4	81	Female	0.89671
0	4	81	Male	0.900028
0	4	82	Female	0.896112
0	4	82	Male	0.89947
0	4	83	Female	0.895513
0	4	83	Male	0.898911
0	4	84	Female	0.894914
0	4	84	Male	0.898351
0	4	85	Female	0.894314
0	4	85	Male	0.897791
0	4	86	Female	0.893714
0	4	86	Male	0.89723
0	4	87	Female	0.893114
0	4	87	Male	0.896669
0	4	88	Female	0.892513
0	4	88	Male	0.896108
0	4	89	Female	0.891912
0	4	89	Male	0.895546
0	4	90	Female	0.89131
0	4	90	Male	0.894983
0	4	91	Female	0.890709
0	4	91	Male	0.89442
0	4	92	Female	0.890106
0	4	92	Male	0.893857
0	4	93	Female	0.889504
0	4	93	Male	0.893294
0	4	94	Female	0.888901
0	4	94	Male	0.892729
0	4	95	Female	0.888298
0	4	95	Male	0.892165
0	4	96	Female	0.887694
0	4	96	Male	0.8916
0	4	97	Female	0.88709
0	4	97	Male	0.891035
0	4	98	Female	0.886486
0	4	98	Male	0.890469
0	4	99	Female	0.885881
0	4	99	Male	0.889904
0	5	18	Female	0.93047
0	5	18	Male	0.930879
0	5	19	Female	0.929922
0	5	19	Male	0.93037
0	5	20	Female	0.929372
0	5	20	Male	0.92986
0	5	21	Female	0.928822
0	5	21	Male	0.929349
0	5	22	Female	0.928269
0	5	22	Male	0.928836
0	5	23	Female	0.927716
0	5	23	Male	0.928323
0	5	24	Female	0.927161
0	5	24	Male	0.927807
0	5	25	Female	0.926604
0	5	25	Male	0.927291
0	5	26	Female	0.926047
0	5	26	Male	0.926773
0	5	27	Female	0.925488
0	5	27	Male	0.926254
0	5	28	Female	0.924927
0	5	28	Male	0.925734
0	5	29	Female	0.924366
0	5	29	Male	0.925212
0	5	30	Female	0.923803
0	5	30	Male	0.924689
0	5	31	Female	0.923239
0	5	31	Male	0.924166
0	5	32	Female	0.922674
0	5	32	Male	0.92364
0	5	33	Female	0.922107
0	5	33	Male	0.923114
0	5	34	Female	0.92154
0	5	34	Male	0.922587
0	5	35	Female	0.920971
0	5	35	Male	0.922058
0	5	36	Female	0.920401
0	5	36	Male	0.921528
0	5	37	Female	0.91983
0	5	37	Male	0.920998
0	5	38	Female	0.919258
0	5	38	Male	0.920466
0	5	39	Female	0.918685
0	5	39	Male	0.919933
0	5	40	Female	0.91811
0	5	40	Male	0.919399
0	5	41	Female	0.917535
0	5	41	Male	0.918864
0	5	42	Female	0.916959
0	5	42	Male	0.918327
0	5	43	Female	0.916382
0	5	43	Male	0.91779
0	5	44	Female	0.915803
0	5	44	Male	0.917252
0	5	45	Female	0.915224
0	5	45	Male	0.916713
0	5	46	Female	0.914644
0	5	46	Male	0.916173
0	5	47	Female	0.914063
0	5	47	Male	0.915632
0	5	48	Female	0.913481
0	5	48	Male	0.91509
0	5	49	Female	0.912898
0	5	49	Male	0.914547
0	5	50	Female	0.912314
0	5	50	Male	0.914004
0	5	51	Female	0.911729
0	5	51	Male	0.913459
0	5	52	Female	0.911144
0	5	52	Male	0.912914
0	5	53	Female	0.910558
0	5	53	Male	0.912367
0	5	54	Female	0.90997
0	5	54	Male	0.91182
0	5	55	Female	0.909383
0	5	55	Male	0.911272
0	5	56	Female	0.908794
0	5	56	Male	0.910723
0	5	57	Female	0.908204
0	5	57	Male	0.910174
0	5	58	Female	0.907614
0	5	58	Male	0.909623
0	5	59	Female	0.907023
0	5	59	Male	0.909072
0	5	60	Female	0.906432
0	5	60	Male	0.90852
0	5	61	Female	0.905839
0	5	61	Male	0.907968
0	5	62	Female	0.905246
0	5	62	Male	0.907414
0	5	63	Female	0.904653
0	5	63	Male	0.90686
0	5	64	Female	0.904059
0	5	64	Male	0.906305
0	5	65	Female	0.903464
0	5	65	Male	0.90575
0	5	66	Female	0.902868
0	5	66	Male	0.905194
0	5	67	Female	0.902272
0	5	67	Male	0.904637
0	5	68	Female	0.901675
0	5	68	Male	0.904079
0	5	69	Female	0.901078
0	5	69	Male	0.903521
0	5	70	Female	0.90048
0	5	70	Male	0.902962
0	5	71	Female	0.899881
0	5	71	Male	0.902403
0	5	72	Female	0.899282
0	5	72	Male	0.901843
0	5	73	Female	0.898683
0	5	73	Male	0.901283
0	5	74	Female	0.898083
0	5	74	Male	0.900722
0	5	75	Female	0.897482
0	5	75	Male	0.90016
0	5	76	Female	0.896881
0	5	76	Male	0.899598
0	5	77	Female	0.896279
0	5	77	Male	0.899035
0	5	78	Female	0.895677
0	5	78	Male	0.898472
0	5	79	Female	0.895075
0	5	79	Male	0.897908
0	5	80	Female	0.894472
0	5	80	Male	0.897344
0	5	81	Female	0.893869
0	5	81	Male	0.896779
0	5	82	Female	0.893265
0	5	82	Male	0.896214
0	5	83	Female	0.892661
0	5	83	Male	0.895648
0	5	84	Female	0.892056
0	5	84	Male	0.895082
0	5	85	Female	0.891451
0	5	85	Male	0.894515
0	5	86	Female	0.890846
0	5	86	Male	0.893948
0	5	87	Female	0.89024
0	5	87	Male	0.89338
0	5	88	Female	0.889634
0	5	88	Male	0.892812
0	5	89	Female	0.889027
0	5	89	Male	0.892244
0	5	90	Female	0.888421
0	5	90	Male	0.891675
0	5	91	Female	0.887813
0	5	91	Male	0.891106
0	5	92	Female	0.887206
0	5	92	Male	0.890537
0	5	93	Female	0.886598
0	5	93	Male	0.889967
0	5	94	Female	0.88599
0	5	94	Male	0.889396
0	5	95	Female	0.885382
0	5	95	Male	0.888826
0	5	96	Female	0.884773
0	5	96	Male	0.888255
0	5	97	Female	0.884164
0	5	97	Male	0.887684
0	5	98	Female	0.883555
0	5	98	Male	0.887112
0	5	99	Female	0.882945
0	5	99	Male	0.88654
0	6	18	Female	0.927988
0	6	18	Male	0.928055
0	6	19	Female	0.927432
0	6	19	Male	0.927537
0	6	20	Female	0.926874
0	6	20	Male	0.927017
0	6	21	Female	0.926314
0	6	21	Male	0.926497
0	6	22	Female	0.925754
0	6	22	Male	0.925975
0	6	23	Female	0.925192
0	6	23	Male	0.925451
0	6	24	Female	0.924628
0	6	24	Male	0.924927
0	6	25	Female	0.924064
0	6	25	Male	0.924401
0	6	26	Female	0.923498
0	6	26	Male	0.923874
0	6	27	Female	0.92293
0	6	27	Male	0.923346
0	6	28	Female	0.922362
0	6	28	Male	0.922816
0	6	29	Female	0.921792
0	6	29	Male	0.922286
0	6	30	Female	0.921221
0	6	30	Male	0.921754
0	6	31	Female	0.920649
0	6	31	Male	0.921221
0	6	32	Female	0.920076
0	6	32	Male	0.920687
0	6	33	Female	0.919502
0	6	33	Male	0.920152
0	6	34	Female	0.918927
0	6	34	Male	0.919616
0	6	35	Female	0.91835
0	6	35	Male	0.919078
0	6	36	Female	0.917772
0	6	36	Male	0.91854
0	6	37	Female	0.917194
0	6	37	Male	0.918
0	6	38	Female	0.916614
0	6	38	Male	0.91746
0	6	39	Female	0.916033
0	6	39	Male	0.916918
0	6	40	Female	0.915452
0	6	40	Male	0.916376
0	6	41	Female	0.914869
0	6	41	Male	0.915832
0	6	42	Female	0.914285
0	6	42	Male	0.915288
0	6	43	Female	0.913701
0	6	43	Male	0.914742
0	6	44	Female	0.913115
0	6	44	Male	0.914196
0	6	45	Female	0.912529
0	6	45	Male	0.913648
0	6	46	Female	0.911942
0	6	46	Male	0.9131
0	6	47	Female	0.911353
0	6	47	Male	0.912551
0	6	48	Female	0.910764
0	6	48	Male	0.912001
0	6	49	Female	0.910175
0	6	49	Male	0.91145
0	6	50	Female	0.909584
0	6	50	Male	0.910898
0	6	51	Female	0.908992
0	6	51	Male	0.910346
0	6	52	Female	0.9084
0	6	52	Male	0.909792
0	6	53	Female	0.907807
0	6	53	Male	0.909238
0	6	54	Female	0.907213
0	6	54	Male	0.908683
0	6	55	Female	0.906618
0	6	55	Male	0.908127
0	6	56	Female	0.906023
0	6	56	Male	0.907571
0	6	57	Female	0.905427
0	6	57	Male	0.907013
0	6	58	Female	0.90483
0	6	58	Male	0.906455
0	6	59	Female	0.904233
0	6	59	Male	0.905897
0	6	60	Female	0.903635
0	6	60	Male	0.905337
0	6	61	Female	0.903036
0	6	61	Male	0.904777
0	6	62	Female	0.902437
0	6	62	Male	0.904216
0	6	63	Female	0.901837
0	6	63	Male	0.903654
0	6	64	Female	0.901236
0	6	64	Male	0.903092
0	6	65	Female	0.900635
0	6	65	Male	0.902529
0	6	66	Female	0.900033
0	6	66	Male	0.901966
0	6	67	Female	0.899431
0	6	67	Male	0.901402
0	6	68	Female	0.898828
0	6	68	Male	0.900837
0	6	69	Female	0.898225
0	6	69	Male	0.900272
0	6	70	Female	0.897621
0	6	70	Male	0.899706
0	6	71	Female	0.897016
0	6	71	Male	0.899139
0	6	72	Female	0.896411
0	6	72	Male	0.898572
0	6	73	Female	0.895806
0	6	73	Male	0.898005
0	6	74	Female	0.8952
0	6	74	Male	0.897437
0	6	75	Female	0.894593
0	6	75	Male	0.896868
0	6	76	Female	0.893986
0	6	76	Male	0.896299
0	6	77	Female	0.893379
0	6	77	Male	0.895729
0	6	78	Female	0.892771
0	6	78	Male	0.895159
0	6	79	Female	0.892163
0	6	79	Male	0.894589
0	6	80	Female	0.891555
0	6	80	Male	0.894018
0	6	81	Female	0.890946
0	6	81	Male	0.893446
0	6	82	Female	0.890336
0	6	82	Male	0.892874
0	6	83	Female	0.889726
0	6	83	Male	0.892302
0	6	84	Female	0.889116
0	6	84	Male	0.891729
0	6	85	Female	0.888506
0	6	85	Male	0.891155
0	6	86	Female	0.887895
0	6	86	Male	0.890582
0	6	87	Female	0.887284
0	6	87	Male	0.890008
0	6	88	Female	0.886672
0	6	88	Male	0.889433
0	6	89	Female	0.88606
0	6	89	Male	0.888858
0	6	90	Female	0.885448
0	6	90	Male	0.888283
0	6	91	Female	0.884835
0	6	91	Male	0.887707
0	6	92	Female	0.884223
0	6	92	Male	0.887132
0	6	93	Female	0.883609
0	6	93	Male	0.886555
0	6	94	Female	0.882996
0	6	94	Male	0.885979
0	6	95	Female	0.882382
0	6	95	Male	0.885402
0	6	96	Female	0.881768
0	6	96	Male	0.884824
0	6	97	Female	0.881154
0	6	97	Male	0.884247
0	6	98	Female	0.88054
0	6	98	Male	0.883669
0	6	99	Female	0.879925
0	6	99	Male	0.883091
0	7	18	Female	0.925426
0	7	18	Male	0.925148
0	7	19	Female	0.92486
0	7	19	Male	0.924621
0	7	20	Female	0.924294
0	7	20	Male	0.924092
0	7	21	Female	0.923726
0	7	21	Male	0.923561
0	7	22	Female	0.923156
0	7	22	Male	0.92303
0	7	23	Female	0.922586
0	7	23	Male	0.922497
0	7	24	Female	0.922014
0	7	24	Male	0.921963
0	7	25	Female	0.921441
0	7	25	Male	0.921428
0	7	26	Female	0.920867
0	7	26	Male	0.920892
0	7	27	Female	0.920291
0	7	27	Male	0.920354
0	7	28	Female	0.919715
0	7	28	Male	0.919816
0	7	29	Female	0.919137
0	7	29	Male	0.919276
0	7	30	Female	0.918558
0	7	30	Male	0.918735
0	7	31	Female	0.917978
0	7	31	Male	0.918193
0	7	32	Female	0.917397
0	7	32	Male	0.91765
0	7	33	Female	0.916815
0	7	33	Male	0.917106
0	7	34	Female	0.916231
0	7	34	Male	0.916561
0	7	35	Female	0.915647
0	7	35	Male	0.916014
0	7	36	Female	0.915062
0	7	36	Male	0.915467
0	7	37	Female	0.914475
0	7	37	Male	0.914919
0	7	38	Female	0.913888
0	7	38	Male	0.91437
0	7	39	Female	0.9133
0	7	39	Male	0.91382
0	7	40	Female	0.912711
0	7	40	Male	0.913268
0	7	41	Female	0.912121
0	7	41	Male	0.912716
0	7	42	Female	0.911529
0	7	42	Male	0.912163
0	7	43	Female	0.910938
0	7	43	Male	0.911609
0	7	44	Female	0.910345
0	7	44	Male	0.911055
0	7	45	Female	0.909751
0	7	45	Male	0.910499
0	7	46	Female	0.909157
0	7	46	Male	0.909942
0	7	47	Female	0.908561
0	7	47	Male	0.909385
0	7	48	Female	0.907965
0	7	48	Male	0.908827
0	7	49	Female	0.907368
0	7	49	Male	0.908268
0	7	50	Female	0.90677
0	7	50	Male	0.907708
0	7	51	Female	0.906172
0	7	51	Male	0.907147
0	7	52	Female	0.905573
0	7	52	Male	0.906586
0	7	53	Female	0.904973
0	7	53	Male	0.906023
0	7	54	Female	0.904372
0	7	54	Male	0.905461
0	7	55	Female	0.903771
0	7	55	Male	0.904897
0	7	56	Female	0.903169
0	7	56	Male	0.904332
0	7	57	Female	0.902566
0	7	57	Male	0.903767
0	7	58	Female	0.901963
0	7	58	Male	0.903201
0	7	59	Female	0.901359
0	7	59	Male	0.902635
0	7	60	Female	0.900754
0	7	60	Male	0.902068
0	7	61	Female	0.900149
0	7	61	Male	0.9015
0	7	62	Female	0.899543
0	7	62	Male	0.900932
0	7	63	Female	0.898937
0	7	63	Male	0.900362
0	7	64	Female	0.89833
0	7	64	Male	0.899793
0	7	65	Female	0.897722
0	7	65	Male	0.899222
0	7	66	Female	0.897114
0	7	66	Male	0.898652
0	7	67	Female	0.896506
0	7	67	Male	0.89808
0	7	68	Female	0.895896
0	7	68	Male	0.897508
0	7	69	Female	0.895287
0	7	69	Male	0.896935
0	7	70	Female	0.894677
0	7	70	Male	0.896362
0	7	71	Female	0.894066
0	7	71	Male	0.895788
0	7	72	Female	0.893455
0	7	72	Male	0.895214
0	7	73	Female	0.892844
0	7	73	Male	0.89464
0	7	74	Female	0.892232
0	7	74	Male	0.894064
0	7	75	Female	0.891619
0	7	75	Male	0.893489
0	7	76	Female	0.891006
0	7	76	Male	0.892912
0	7	77	Female	0.890393
0	7	77	Male	0.892336
0	7	78	Female	0.889779
0	7	78	Male	0.891759
0	7	79	Female	0.889165
0	7	79	Male	0.891181
0	7	80	Female	0.888551
0	7	80	Male	0.890603
0	7	81	Female	0.887936
0	7	81	Male	0.890025
0	7	82	Female	0.887321
0	7	82	Male	0.889446
0	7	83	Female	0.886705
0	7	83	Male	0.888866
0	7	84	Female	0.88609
0	7	84	Male	0.888287
0	7	85	Female	0.885473
0	7	85	Male	0.887707
0	7	86	Female	0.884857
0	7	86	Male	0.887126
0	7	87	Female	0.88424
0	7	87	Male	0.886546
0	7	88	Female	0.883623
0	7	88	Male	0.885964
0	7	89	Female	0.883005
0	7	89	Male	0.885383
0	7	90	Female	0.882388
0	7	90	Male	0.884801
0	7	91	Female	0.88177
0	7	91	Male	0.884219
0	7	92	Female	0.881151
0	7	92	Male	0.883636
0	7	93	Female	0.880533
0	7	93	Male	0.883053
0	7	94	Female	0.879914
0	7	94	Male	0.88247
0	7	95	Female	0.879295
0	7	95	Male	0.881887
0	7	96	Female	0.878675
0	7	96	Male	0.881303
0	7	97	Female	0.878056
0	7	97	Male	0.880719
0	7	98	Female	0.877436
0	7	98	Male	0.880135
0	7	99	Female	0.876816
0	7	99	Male	0.87955
0	8	18	Female	0.922778
0	8	18	Male	0.922154
0	8	19	Female	0.922204
0	8	19	Male	0.921617
0	8	20	Female	0.921628
0	8	20	Male	0.921078
0	8	21	Female	0.921052
0	8	21	Male	0.920538
0	8	22	Female	0.920474
0	8	22	Male	0.919997
0	8	23	Female	0.919895
0	8	23	Male	0.919455
0	8	24	Female	0.919314
0	8	24	Male	0.918911
0	8	25	Female	0.918733
0	8	25	Male	0.918367
0	8	26	Female	0.91815
0	8	26	Male	0.917821
0	8	27	Female	0.917566
0	8	27	Male	0.917274
0	8	28	Female	0.916981
0	8	28	Male	0.916727
0	8	29	Female	0.916395
0	8	29	Male	0.916178
0	8	30	Female	0.915808
0	8	30	Male	0.915627
0	8	31	Female	0.91522
0	8	31	Male	0.915076
0	8	32	Female	0.914631
0	8	32	Male	0.914524
0	8	33	Female	0.914041
0	8	33	Male	0.913971
0	8	34	Female	0.91345
0	8	34	Male	0.913417
0	8	35	Female	0.912858
0	8	35	Male	0.912862
0	8	36	Female	0.912265
0	8	36	Male	0.912306
0	8	37	Female	0.91167
0	8	37	Male	0.911749
0	8	38	Female	0.911075
0	8	38	Male	0.911191
0	8	39	Female	0.91048
0	8	39	Male	0.910632
0	8	40	Female	0.909883
0	8	40	Male	0.910072
0	8	41	Female	0.909285
0	8	41	Male	0.909511
0	8	42	Female	0.908687
0	8	42	Male	0.90895
0	8	43	Female	0.908087
0	8	43	Male	0.908387
0	8	44	Female	0.907487
0	8	44	Male	0.907824
0	8	45	Female	0.906886
0	8	45	Male	0.90726
0	8	46	Female	0.906284
0	8	46	Male	0.906695
0	8	47	Female	0.905682
0	8	47	Male	0.906129
0	8	48	Female	0.905078
0	8	48	Male	0.905563
0	8	49	Female	0.904474
0	8	49	Male	0.904995
0	8	50	Female	0.903869
0	8	50	Male	0.904427
0	8	51	Female	0.903264
0	8	51	Male	0.903858
0	8	52	Female	0.902658
0	8	52	Male	0.903289
0	8	53	Female	0.902051
0	8	53	Male	0.902719
0	8	54	Female	0.901443
0	8	54	Male	0.902148
0	8	55	Female	0.900835
0	8	55	Male	0.901576
0	8	56	Female	0.900226
0	8	56	Male	0.901003
0	8	57	Female	0.899617
0	8	57	Male	0.90043
0	8	58	Female	0.899007
0	8	58	Male	0.899857
0	8	59	Female	0.898396
0	8	59	Male	0.899282
0	8	60	Female	0.897785
0	8	60	Male	0.898707
0	8	61	Female	0.897173
0	8	61	Male	0.898132
0	8	62	Female	0.896561
0	8	62	Male	0.897556
0	8	63	Female	0.895948
0	8	63	Male	0.896979
0	8	64	Female	0.895334
0	8	64	Male	0.896402
0	8	65	Female	0.89472
0	8	65	Male	0.895824
0	8	66	Female	0.894106
0	8	66	Male	0.895245
0	8	67	Female	0.893491
0	8	67	Male	0.894666
0	8	68	Female	0.892875
0	8	68	Male	0.894087
0	8	69	Female	0.892259
0	8	69	Male	0.893507
0	8	70	Female	0.891643
0	8	70	Male	0.892926
0	8	71	Female	0.891026
0	8	71	Male	0.892345
0	8	72	Female	0.890409
0	8	72	Male	0.891763
0	8	73	Female	0.889791
0	8	73	Male	0.891181
0	8	74	Female	0.889173
0	8	74	Male	0.890599
0	8	75	Female	0.888554
0	8	75	Male	0.890016
0	8	76	Female	0.887936
0	8	76	Male	0.889433
0	8	77	Female	0.887316
0	8	77	Male	0.888849
0	8	78	Female	0.886697
0	8	78	Male	0.888264
0	8	79	Female	0.886077
0	8	79	Male	0.88768
0	8	80	Female	0.885456
0	8	80	Male	0.887095
0	8	81	Female	0.884835
0	8	81	Male	0.886509
0	8	82	Female	0.884214
0	8	82	Male	0.885923
0	8	83	Female	0.883593
0	8	83	Male	0.885337
0	8	84	Female	0.882971
0	8	84	Male	0.88475
0	8	85	Female	0.882349
0	8	85	Male	0.884164
0	8	86	Female	0.881727
0	8	86	Male	0.883576
0	8	87	Female	0.881104
0	8	87	Male	0.882989
0	8	88	Female	0.880481
0	8	88	Male	0.8824
0	8	89	Female	0.879858
0	8	89	Male	0.881812
0	8	90	Female	0.879235
0	8	90	Male	0.881224
0	8	91	Female	0.878611
0	8	91	Male	0.880635
0	8	92	Female	0.877987
0	8	92	Male	0.880045
0	8	93	Female	0.877363
0	8	93	Male	0.879456
0	8	94	Female	0.876738
0	8	94	Male	0.878866
0	8	95	Female	0.876114
0	8	95	Male	0.878276
0	8	96	Female	0.875489
0	8	96	Male	0.877685
0	8	97	Female	0.874864
0	8	97	Male	0.877095
0	8	98	Female	0.874238
0	8	98	Male	0.876504
0	8	99	Female	0.873613
0	8	99	Male	0.875913
0	9	18	Female	0.92004
0	9	18	Male	0.919068
0	9	19	Female	0.919457
0	9	19	Male	0.918521
0	9	20	Female	0.918873
0	9	20	Male	0.917973
0	9	21	Female	0.918288
0	9	21	Male	0.917423
0	9	22	Female	0.917701
0	9	22	Male	0.916872
0	9	23	Female	0.917113
0	9	23	Male	0.91632
0	9	24	Female	0.916524
0	9	24	Male	0.915767
0	9	25	Female	0.915934
0	9	25	Male	0.915213
0	9	26	Female	0.915343
0	9	26	Male	0.914658
0	9	27	Female	0.914751
0	9	27	Male	0.914102
0	9	28	Female	0.914158
0	9	28	Male	0.913545
0	9	29	Female	0.913564
0	9	29	Male	0.912986
0	9	30	Female	0.912968
0	9	30	Male	0.912427
0	9	31	Female	0.912372
0	9	31	Male	0.911867
0	9	32	Female	0.911775
0	9	32	Male	0.911306
0	9	33	Female	0.911177
0	9	33	Male	0.910743
0	9	34	Female	0.910577
0	9	34	Male	0.91018
0	9	35	Female	0.909977
0	9	35	Male	0.909616
0	9	36	Female	0.909376
0	9	36	Male	0.909051
0	9	37	Female	0.908774
0	9	37	Male	0.908485
0	9	38	Female	0.908172
0	9	38	Male	0.907918
0	9	39	Female	0.907568
0	9	39	Male	0.90735
0	9	40	Female	0.906964
0	9	40	Male	0.906782
0	9	41	Female	0.906358
0	9	41	Male	0.906212
0	9	42	Female	0.905752
0	9	42	Male	0.905642
0	9	43	Female	0.905145
0	9	43	Male	0.905071
0	9	44	Female	0.904538
0	9	44	Male	0.904499
0	9	45	Female	0.903929
0	9	45	Male	0.903926
0	9	46	Female	0.90332
0	9	46	Male	0.903353
0	9	47	Female	0.90271
0	9	47	Male	0.902779
0	9	48	Female	0.9021
0	9	48	Male	0.902204
0	9	49	Female	0.901488
0	9	49	Male	0.901628
0	9	50	Female	0.900876
0	9	50	Male	0.901051
0	9	51	Female	0.900264
0	9	51	Male	0.900474
0	9	52	Female	0.89965
0	9	52	Male	0.899897
0	9	53	Female	0.899036
0	9	53	Male	0.899318
0	9	54	Female	0.898422
0	9	54	Male	0.898739
0	9	55	Female	0.897807
0	9	55	Male	0.898159
0	9	56	Female	0.897191
0	9	56	Male	0.897579
0	9	57	Female	0.896574
0	9	57	Male	0.896998
0	9	58	Female	0.895957
0	9	58	Male	0.896416
0	9	59	Female	0.89534
0	9	59	Male	0.895834
0	9	60	Female	0.894722
0	9	60	Male	0.895251
0	9	61	Female	0.894103
0	9	61	Male	0.894667
0	9	62	Female	0.893484
0	9	62	Male	0.894083
0	9	63	Female	0.892865
0	9	63	Male	0.893499
0	9	64	Female	0.892245
0	9	64	Male	0.892913
0	9	65	Female	0.891624
0	9	65	Male	0.892328
0	9	66	Female	0.891003
0	9	66	Male	0.891742
0	9	67	Female	0.890381
0	9	67	Male	0.891155
0	9	68	Female	0.889759
0	9	68	Male	0.890568
0	9	69	Female	0.889137
0	9	69	Male	0.88998
0	9	70	Female	0.888514
0	9	70	Male	0.889392
0	9	71	Female	0.887891
0	9	71	Male	0.888803
0	9	72	Female	0.887267
0	9	72	Male	0.888214
0	9	73	Female	0.886643
0	9	73	Male	0.887625
0	9	74	Female	0.886019
0	9	74	Male	0.887035
0	9	75	Female	0.885394
0	9	75	Male	0.886445
0	9	76	Female	0.884769
0	9	76	Male	0.885854
0	9	77	Female	0.884144
0	9	77	Male	0.885263
0	9	78	Female	0.883518
0	9	78	Male	0.884671
0	9	79	Female	0.882892
0	9	79	Male	0.884079
0	9	80	Female	0.882265
0	9	80	Male	0.883487
0	9	81	Female	0.881638
0	9	81	Male	0.882894
0	9	82	Female	0.881011
0	9	82	Male	0.882301
0	9	83	Female	0.880384
0	9	83	Male	0.881707
0	9	84	Female	0.879756
0	9	84	Male	0.881114
0	9	85	Female	0.879128
0	9	85	Male	0.88052
0	9	86	Female	0.8785
0	9	86	Male	0.879925
0	9	87	Female	0.877871
0	9	87	Male	0.879331
0	9	88	Female	0.877242
0	9	88	Male	0.878735
0	9	89	Female	0.876613
0	9	89	Male	0.87814
0	9	90	Female	0.875984
0	9	90	Male	0.877544
0	9	91	Female	0.875354
0	9	91	Male	0.876949
0	9	92	Female	0.874724
0	9	92	Male	0.876352
0	9	93	Female	0.874094
0	9	93	Male	0.875756
0	9	94	Female	0.873464
0	9	94	Male	0.875159
0	9	95	Female	0.872834
0	9	95	Male	0.874562
0	9	96	Female	0.872203
0	9	96	Male	0.873965
0	9	97	Female	0.871572
0	9	97	Male	0.873367
0	9	98	Female	0.870941
0	9	98	Male	0.87277
0	9	99	Female	0.87031
0	9	99	Male	0.872172
0	10	18	Female	0.917208
0	10	18	Male	0.915886
0	10	19	Female	0.916616
0	10	19	Male	0.915329
0	10	20	Female	0.916023
0	10	20	Male	0.91477
0	10	21	Female	0.915429
0	10	21	Male	0.914211
0	10	22	Female	0.914834
0	10	22	Male	0.91365
0	10	23	Female	0.914237
0	10	23	Male	0.913089
0	10	24	Female	0.91364
0	10	24	Male	0.912526
0	10	25	Female	0.913041
0	10	25	Male	0.911962
0	10	26	Female	0.912442
0	10	26	Male	0.911398
0	10	27	Female	0.911841
0	10	27	Male	0.910832
0	10	28	Female	0.911239
0	10	28	Male	0.910265
0	10	29	Female	0.910637
0	10	29	Male	0.909697
0	10	30	Female	0.910033
0	10	30	Male	0.909129
0	10	31	Female	0.909429
0	10	31	Male	0.908559
0	10	32	Female	0.908823
0	10	32	Male	0.907988
0	10	33	Female	0.908217
0	10	33	Male	0.907417
0	10	34	Female	0.90761
0	10	34	Male	0.906845
0	10	35	Female	0.907001
0	10	35	Male	0.906271
0	10	36	Female	0.906392
0	10	36	Male	0.905697
0	10	37	Female	0.905783
0	10	37	Male	0.905122
0	10	38	Female	0.905172
0	10	38	Male	0.904546
0	10	39	Female	0.90456
0	10	39	Male	0.903969
0	10	40	Female	0.903948
0	10	40	Male	0.903392
0	10	41	Female	0.903335
0	10	41	Male	0.902814
0	10	42	Female	0.902721
0	10	42	Male	0.902235
0	10	43	Female	0.902107
0	10	43	Male	0.901655
0	10	44	Female	0.901492
0	10	44	Male	0.901074
0	10	45	Female	0.900876
0	10	45	Male	0.900493
0	10	46	Female	0.900259
0	10	46	Male	0.89991
0	10	47	Female	0.899642
0	10	47	Male	0.899328
0	10	48	Female	0.899024
0	10	48	Male	0.898744
0	10	49	Female	0.898405
0	10	49	Male	0.89816
0	10	50	Female	0.897786
0	10	50	Male	0.897575
0	10	51	Female	0.897166
0	10	51	Male	0.896989
0	10	52	Female	0.896545
0	10	52	Male	0.896403
0	10	53	Female	0.895924
0	10	53	Male	0.895816
0	10	54	Female	0.895302
0	10	54	Male	0.895229
0	10	55	Female	0.89468
0	10	55	Male	0.894641
0	10	56	Female	0.894057
0	10	56	Male	0.894052
0	10	57	Female	0.893434
0	10	57	Male	0.893463
0	10	58	Female	0.89281
0	10	58	Male	0.892873
0	10	59	Female	0.892185
0	10	59	Male	0.892282
0	10	60	Female	0.89156
0	10	60	Male	0.891691
0	10	61	Female	0.890935
0	10	61	Male	0.8911
0	10	62	Female	0.890309
0	10	62	Male	0.890508
0	10	63	Female	0.889683
0	10	63	Male	0.889915
0	10	64	Female	0.889056
0	10	64	Male	0.889322
0	10	65	Female	0.888428
0	10	65	Male	0.888729
0	10	66	Female	0.887801
0	10	66	Male	0.888135
0	10	67	Female	0.887172
0	10	67	Male	0.88754
0	10	68	Female	0.886544
0	10	68	Male	0.886945
0	10	69	Female	0.885915
0	10	69	Male	0.88635
0	10	70	Female	0.885286
0	10	70	Male	0.885754
0	10	71	Female	0.884656
0	10	71	Male	0.885158
0	10	72	Female	0.884026
0	10	72	Male	0.884561
0	10	73	Female	0.883395
0	10	73	Male	0.883964
0	10	74	Female	0.882764
0	10	74	Male	0.883366
0	10	75	Female	0.882133
0	10	75	Male	0.882768
0	10	76	Female	0.881501
0	10	76	Male	0.88217
0	10	77	Female	0.88087
0	10	77	Male	0.881571
0	10	78	Female	0.880237
0	10	78	Male	0.880972
0	10	79	Female	0.879605
0	10	79	Male	0.880373
0	10	80	Female	0.878972
0	10	80	Male	0.879773
0	10	81	Female	0.878339
0	10	81	Male	0.879173
0	10	82	Female	0.877706
0	10	82	Male	0.878572
0	10	83	Female	0.877072
0	10	83	Male	0.877971
0	10	84	Female	0.876438
0	10	84	Male	0.87737
0	10	85	Female	0.875804
0	10	85	Male	0.876769
0	10	86	Female	0.875169
0	10	86	Male	0.876167
0	10	87	Female	0.874535
0	10	87	Male	0.875565
0	10	88	Female	0.8739
0	10	88	Male	0.874963
0	10	89	Female	0.873265
0	10	89	Male	0.87436
0	10	90	Female	0.872629
0	10	90	Male	0.873757
0	10	91	Female	0.871994
0	10	91	Male	0.873154
0	10	92	Female	0.871358
0	10	92	Male	0.872551
0	10	93	Female	0.870722
0	10	93	Male	0.871947
0	10	94	Female	0.870086
0	10	94	Male	0.871344
0	10	95	Female	0.869449
0	10	95	Male	0.870739
0	10	96	Female	0.868813
0	10	96	Male	0.870135
0	10	97	Female	0.868176
0	10	97	Male	0.869531
0	10	98	Female	0.867539
0	10	98	Male	0.868926
0	10	99	Female	0.866902
0	10	99	Male	0.868321
0	11	18	Female	0.914278
0	11	18	Male	0.912602
0	11	19	Female	0.913677
0	11	19	Male	0.912034
0	11	20	Female	0.913075
0	11	20	Male	0.911466
0	11	21	Female	0.912471
0	11	21	Male	0.910897
0	11	22	Female	0.911867
0	11	22	Male	0.910326
0	11	23	Female	0.911262
0	11	23	Male	0.909755
0	11	24	Female	0.910656
0	11	24	Male	0.909182
0	11	25	Female	0.910049
0	11	25	Male	0.908609
0	11	26	Female	0.90944
0	11	26	Male	0.908034
0	11	27	Female	0.908831
0	11	27	Male	0.907459
0	11	28	Female	0.908221
0	11	28	Male	0.906882
0	11	29	Female	0.90761
0	11	29	Male	0.906305
0	11	30	Female	0.906998
0	11	30	Male	0.905727
0	11	31	Female	0.906385
0	11	31	Male	0.905148
0	11	32	Female	0.905771
0	11	32	Male	0.904568
0	11	33	Female	0.905157
0	11	33	Male	0.903987
0	11	34	Female	0.904541
0	11	34	Male	0.903405
0	11	35	Female	0.903925
0	11	35	Male	0.902822
0	11	36	Female	0.903308
0	11	36	Male	0.902239
0	11	37	Female	0.90269
0	11	37	Male	0.901655
0	11	38	Female	0.902071
0	11	38	Male	0.90107
0	11	39	Female	0.901452
0	11	39	Male	0.900484
0	11	40	Female	0.900832
0	11	40	Male	0.899897
0	11	41	Female	0.900211
0	11	41	Male	0.89931
0	11	42	Female	0.899589
0	11	42	Male	0.898722
0	11	43	Female	0.898967
0	11	43	Male	0.898133
0	11	44	Female	0.898344
0	11	44	Male	0.897543
0	11	45	Female	0.89772
0	11	45	Male	0.896953
0	11	46	Female	0.897096
0	11	46	Male	0.896362
0	11	47	Female	0.896471
0	11	47	Male	0.895771
0	11	48	Female	0.895845
0	11	48	Male	0.895178
0	11	49	Female	0.895219
0	11	49	Male	0.894585
0	11	50	Female	0.894592
0	11	50	Male	0.893992
0	11	51	Female	0.893965
0	11	51	Male	0.893398
0	11	52	Female	0.893337
0	11	52	Male	0.892803
0	11	53	Female	0.892709
0	11	53	Male	0.892207
0	11	54	Female	0.89208
0	11	54	Male	0.891611
0	11	55	Female	0.89145
0	11	55	Male	0.891015
0	11	56	Female	0.89082
0	11	56	Male	0.890418
0	11	57	Female	0.890189
0	11	57	Male	0.88982
0	11	58	Female	0.889558
0	11	58	Male	0.889222
0	11	59	Female	0.888927
0	11	59	Male	0.888623
0	11	60	Female	0.888295
0	11	60	Male	0.888024
0	11	61	Female	0.887662
0	11	61	Male	0.887424
0	11	62	Female	0.887029
0	11	62	Male	0.886824
0	11	63	Female	0.886396
0	11	63	Male	0.886223
0	11	64	Female	0.885762
0	11	64	Male	0.885622
0	11	65	Female	0.885128
0	11	65	Male	0.88502
0	11	66	Female	0.884493
0	11	66	Male	0.884418
0	11	67	Female	0.883858
0	11	67	Male	0.883816
0	11	68	Female	0.883223
0	11	68	Male	0.883213
0	11	69	Female	0.882587
0	11	69	Male	0.882609
0	11	70	Female	0.881951
0	11	70	Male	0.882005
0	11	71	Female	0.881315
0	11	71	Male	0.881401
0	11	72	Female	0.880678
0	11	72	Male	0.880796
0	11	73	Female	0.880041
0	11	73	Male	0.880191
0	11	74	Female	0.879403
0	11	74	Male	0.879586
0	11	75	Female	0.878765
0	11	75	Male	0.87898
0	11	76	Female	0.878127
0	11	76	Male	0.878374
0	11	77	Female	0.877489
0	11	77	Male	0.877768
0	11	78	Female	0.87685
0	11	78	Male	0.877161
0	11	79	Female	0.876211
0	11	79	Male	0.876554
0	11	80	Female	0.875572
0	11	80	Male	0.875946
0	11	81	Female	0.874932
0	11	81	Male	0.875339
0	11	82	Female	0.874292
0	11	82	Male	0.87473
0	11	83	Female	0.873652
0	11	83	Male	0.874122
0	11	84	Female	0.873012
0	11	84	Male	0.873513
0	11	85	Female	0.872371
0	11	85	Male	0.872904
0	11	86	Female	0.871731
0	11	86	Male	0.872295
0	11	87	Female	0.87109
0	11	87	Male	0.871686
0	11	88	Female	0.870448
0	11	88	Male	0.871076
0	11	89	Female	0.869807
0	11	89	Male	0.870466
0	11	90	Female	0.869165
0	11	90	Male	0.869856
0	11	91	Female	0.868523
0	11	91	Male	0.869245
0	11	92	Female	0.867881
0	11	92	Male	0.868634
0	11	93	Female	0.867239
0	11	93	Male	0.868023
0	11	94	Female	0.866597
0	11	94	Male	0.867412
0	11	95	Female	0.865954
0	11	95	Male	0.866801
0	11	96	Female	0.865311
0	11	96	Male	0.866189
0	11	97	Female	0.864668
0	11	97	Male	0.865577
0	11	98	Female	0.864025
0	11	98	Male	0.864965
0	11	99	Female	0.863382
0	11	99	Male	0.864353
0	12	18	Female	0.911243
0	12	18	Male	0.90921
0	12	19	Female	0.910633
0	12	19	Male	0.908632
0	12	20	Female	0.910022
0	12	20	Male	0.908054
0	12	21	Female	0.90941
0	12	21	Male	0.907474
0	12	22	Female	0.908797
0	12	22	Male	0.906894
0	12	23	Female	0.908182
0	12	23	Male	0.906312
0	12	24	Female	0.907567
0	12	24	Male	0.90573
0	12	25	Female	0.906951
0	12	25	Male	0.905146
0	12	26	Female	0.906334
0	12	26	Male	0.904562
0	12	27	Female	0.905716
0	12	27	Male	0.903977
0	12	28	Female	0.905098
0	12	28	Male	0.90339
0	12	29	Female	0.904478
0	12	29	Male	0.902803
0	12	30	Female	0.903857
0	12	30	Male	0.902215
0	12	31	Female	0.903236
0	12	31	Male	0.901627
0	12	32	Female	0.902614
0	12	32	Male	0.901037
0	12	33	Female	0.901991
[truncated: 99,025 more rows]

## Sheet: P-R
PHQ9	age	sex	P-R12
0	18	Female	0.95428
0	18	Male	0.959109
0	19	Female	0.953806
0	19	Male	0.958668
0	20	Female	0.95333
0	20	Male	0.958225
0	21	Female	0.952851
0	21	Male	0.957778
0	22	Female	0.952369
0	22	Male	0.957328
0	23	Female	0.951885
0	23	Male	0.956876
0	24	Female	0.951399
0	24	Male	0.95642
0	25	Female	0.95091
0	25	Male	0.955962
0	26	Female	0.950419
0	26	Male	0.955501
0	27	Female	0.949925
0	27	Male	0.955037
0	28	Female	0.949429
0	28	Male	0.95457
0	29	Female	0.94893
0	29	Male	0.9541
0	30	Female	0.94843
0	30	Male	0.953628
0	31	Female	0.947927
0	31	Male	0.953154
0	32	Female	0.947422
0	32	Male	0.952676
0	33	Female	0.946915
0	33	Male	0.952196
0	34	Female	0.946405
0	34	Male	0.951714
0	35	Female	0.945894
0	35	Male	0.951228
0	36	Female	0.94538
0	36	Male	0.950741
0	37	Female	0.944865
0	37	Male	0.950251
0	38	Female	0.944347
0	38	Male	0.949759
0	39	Female	0.943828
0	39	Male	0.949264
0	40	Female	0.943307
0	40	Male	0.948767
0	41	Female	0.942784
0	41	Male	0.948267
0	42	Female	0.942259
0	42	Male	0.947766
0	43	Female	0.941732
0	43	Male	0.947262
0	44	Female	0.941204
0	44	Male	0.946756
0	45	Female	0.940674
0	45	Male	0.946248
0	46	Female	0.940142
0	46	Male	0.945737
0	47	Female	0.939609
0	47	Male	0.945225
0	48	Female	0.939074
0	48	Male	0.944711
0	49	Female	0.938537
0	49	Male	0.944194
0	50	Female	0.937999
0	50	Male	0.943676
0	51	Female	0.93746
0	51	Male	0.943156
0	52	Female	0.936919
0	52	Male	0.942634
0	53	Female	0.936376
0	53	Male	0.94211
0	54	Female	0.935832
0	54	Male	0.941584
0	55	Female	0.935287
0	55	Male	0.941057
0	56	Female	0.934741
0	56	Male	0.940528
0	57	Female	0.934193
0	57	Male	0.939997
0	58	Female	0.933644
0	58	Male	0.939464
0	59	Female	0.933094
0	59	Male	0.93893
0	60	Female	0.932542
0	60	Male	0.938394
0	61	Female	0.93199
0	61	Male	0.937857
0	62	Female	0.931436
0	62	Male	0.937318
0	63	Female	0.930881
0	63	Male	0.936778
0	64	Female	0.930325
0	64	Male	0.936236
0	65	Female	0.929768
0	65	Male	0.935693
0	66	Female	0.92921
0	66	Male	0.935149
0	67	Female	0.928651
0	67	Male	0.934603
0	68	Female	0.928091
0	68	Male	0.934056
0	69	Female	0.927531
0	69	Male	0.933508
0	70	Female	0.926969
0	70	Male	0.932958
0	71	Female	0.926406
0	71	Male	0.932407
0	72	Female	0.925843
0	72	Male	0.931855
0	73	Female	0.925279
0	73	Male	0.931302
0	74	Female	0.924713
0	74	Male	0.930748
0	75	Female	0.924148
0	75	Male	0.930192
0	76	Female	0.923581
0	76	Male	0.929636
0	77	Female	0.923014
0	77	Male	0.929078
0	78	Female	0.922446
0	78	Male	0.92852
0	79	Female	0.921877
0	79	Male	0.92796
0	80	Female	0.921307
0	80	Male	0.9274
0	81	Female	0.920737
0	81	Male	0.926839
0	82	Female	0.920167
0	82	Male	0.926276
0	83	Female	0.919595
0	83	Male	0.925713
0	84	Female	0.919023
0	84	Male	0.925149
0	85	Female	0.918451
0	85	Male	0.924585
0	86	Female	0.917878
0	86	Male	0.924019
0	87	Female	0.917304
0	87	Male	0.923453
0	88	Female	0.91673
0	88	Male	0.922886
0	89	Female	0.916156
0	89	Male	0.922318
0	90	Female	0.915581
0	90	Male	0.921749
0	91	Female	0.915005
0	91	Male	0.92118
0	92	Female	0.914429
0	92	Male	0.92061
0	93	Female	0.913853
0	93	Male	0.92004
0	94	Female	0.913276
0	94	Male	0.919469
0	95	Female	0.912699
0	95	Male	0.918897
0	96	Female	0.912121
0	96	Male	0.918325
0	97	Female	0.911543
0	97	Male	0.917752
0	98	Female	0.910965
0	98	Male	0.917179
0	99	Female	0.910386
0	99	Male	0.916605
1	18	Female	0.940505
1	18	Male	0.945919
1	19	Female	0.939975
1	19	Male	0.945412
1	20	Female	0.939443
1	20	Male	0.944903
1	21	Female	0.93891
1	21	Male	0.944391
1	22	Female	0.938374
1	22	Male	0.943878
1	23	Female	0.937838
1	23	Male	0.943363
1	24	Female	0.937299
1	24	Male	0.942845
1	25	Female	0.936759
1	25	Male	0.942326
1	26	Female	0.936217
1	26	Male	0.941804
1	27	Female	0.935674
1	27	Male	0.94128
1	28	Female	0.935129
1	28	Male	0.940755
1	29	Female	0.934583
1	29	Male	0.940228
1	30	Female	0.934035
1	30	Male	0.939699
1	31	Female	0.933486
1	31	Male	0.939168
1	32	Female	0.932936
1	32	Male	0.938635
1	33	Female	0.932384
1	33	Male	0.938101
1	34	Female	0.931831
1	34	Male	0.937564
1	35	Female	0.931277
1	35	Male	0.937027
1	36	Female	0.930721
1	36	Male	0.936487
1	37	Female	0.930164
1	37	Male	0.935946
1	38	Female	0.929606
1	38	Male	0.935404
1	39	Female	0.929047
1	39	Male	0.934859
1	40	Female	0.928487
1	40	Male	0.934314
1	41	Female	0.927925
1	41	Male	0.933767
1	42	Female	0.927363
1	42	Male	0.933218
1	43	Female	0.926799
1	43	Male	0.932668
1	44	Female	0.926235
1	44	Male	0.932117
1	45	Female	0.925669
1	45	Male	0.931565
1	46	Female	0.925102
1	46	Male	0.931011
1	47	Female	0.924535
1	47	Male	0.930455
1	48	Female	0.923967
1	48	Male	0.929899
1	49	Female	0.923397
1	49	Male	0.929341
1	50	Female	0.922827
1	50	Male	0.928783
1	51	Female	0.922256
1	51	Male	0.928223
1	52	Female	0.921684
1	52	Male	0.927662
1	53	Female	0.921112
1	53	Male	0.9271
1	54	Female	0.920538
1	54	Male	0.926536
1	55	Female	0.919964
1	55	Male	0.925972
1	56	Female	0.919389
1	56	Male	0.925407
1	57	Female	0.918814
1	57	Male	0.924841
1	58	Female	0.918237
1	58	Male	0.924273
1	59	Female	0.91766
1	59	Male	0.923705
1	60	Female	0.917083
1	60	Male	0.923136
1	61	Female	0.916505
1	61	Male	0.922566
1	62	Female	0.915926
1	62	Male	0.921996
1	63	Female	0.915347
1	63	Male	0.921424
1	64	Female	0.914767
1	64	Male	0.920852
1	65	Female	0.914186
1	65	Male	0.920278
1	66	Female	0.913605
1	66	Male	0.919704
1	67	Female	0.913023
1	67	Male	0.91913
1	68	Female	0.912441
1	68	Male	0.918554
1	69	Female	0.911859
1	69	Male	0.917978
1	70	Female	0.911276
1	70	Male	0.917401
1	71	Female	0.910692
1	71	Male	0.916824
1	72	Female	0.910108
1	72	Male	0.916246
1	73	Female	0.909524
1	73	Male	0.915667
1	74	Female	0.908939
1	74	Male	0.915088
1	75	Female	0.908354
1	75	Male	0.914508
1	76	Female	0.907768
1	76	Male	0.913928
1	77	Female	0.907182
1	77	Male	0.913347
1	78	Female	0.906596
1	78	Male	0.912765
1	79	Female	0.90601
1	79	Male	0.912183
1	80	Female	0.905423
1	80	Male	0.911601
1	81	Female	0.904835
1	81	Male	0.911018
1	82	Female	0.904248
1	82	Male	0.910434
1	83	Female	0.90366
1	83	Male	0.90985
1	84	Female	0.903071
1	84	Male	0.909266
1	85	Female	0.902483
1	85	Male	0.908681
1	86	Female	0.901894
1	86	Male	0.908096
1	87	Female	0.901305
1	87	Male	0.907511
1	88	Female	0.900716
1	88	Male	0.906925
1	89	Female	0.900126
1	89	Male	0.906338
1	90	Female	0.899536
1	90	Male	0.905752
1	91	Female	0.898946
1	91	Male	0.905165
1	92	Female	0.898356
1	92	Male	0.904577
1	93	Female	0.897765
1	93	Male	0.90399
1	94	Female	0.897175
1	94	Male	0.903402
1	95	Female	0.896584
1	95	Male	0.902814
1	96	Female	0.895993
1	96	Male	0.902225
1	97	Female	0.895401
1	97	Male	0.901636
1	98	Female	0.89481
1	98	Male	0.901047
1	99	Female	0.894218
1	99	Male	0.900458
2	18	Female	0.925749
2	18	Male	0.931509
2	19	Female	0.925181
2	19	Male	0.930955
2	20	Female	0.924612
2	20	Male	0.930399
2	21	Female	0.924041
2	21	Male	0.929842
2	22	Female	0.92347
2	22	Male	0.929284
2	23	Female	0.922897
2	23	Male	0.928724
2	24	Female	0.922324
2	24	Male	0.928164
2	25	Female	0.92175
2	25	Male	0.927601
2	26	Female	0.921174
2	26	Male	0.927038
2	27	Female	0.920598
2	27	Male	0.926473
2	28	Female	0.920021
2	28	Male	0.925908
2	29	Female	0.919443
2	29	Male	0.925341
2	30	Female	0.918864
2	30	Male	0.924773
2	31	Female	0.918284
2	31	Male	0.924204
2	32	Female	0.917704
2	32	Male	0.923633
2	33	Female	0.917123
2	33	Male	0.923062
2	34	Female	0.916541
2	34	Male	0.92249
2	35	Female	0.915958
2	35	Male	0.921916
2	36	Female	0.915375
2	36	Male	0.921342
2	37	Female	0.914791
2	37	Male	0.920767
2	38	Female	0.914206
2	38	Male	0.920191
2	39	Female	0.91362
2	39	Male	0.919614
2	40	Female	0.913034
2	40	Male	0.919036
2	41	Female	0.912448
2	41	Male	0.918457
2	42	Female	0.91186
2	42	Male	0.917878
2	43	Female	0.911272
2	43	Male	0.917297
2	44	Female	0.910684
2	44	Male	0.916716
2	45	Female	0.910095
2	45	Male	0.916134
2	46	Female	0.909505
2	46	Male	0.915552
2	47	Female	0.908915
2	47	Male	0.914968
2	48	Female	0.908325
2	48	Male	0.914384
2	49	Female	0.907734
2	49	Male	0.913799
2	50	Female	0.907142
2	50	Male	0.913214
2	51	Female	0.90655
2	51	Male	0.912628
2	52	Female	0.905958
2	52	Male	0.912041
2	53	Female	0.905365
2	53	Male	0.911454
2	54	Female	0.904772
2	54	Male	0.910866
2	55	Female	0.904178
2	55	Male	0.910277
2	56	Female	0.903584
2	56	Male	0.909688
2	57	Female	0.90299
2	57	Male	0.909099
2	58	Female	0.902395
2	58	Male	0.908509
2	59	Female	0.9018
2	59	Male	0.907918
2	60	Female	0.901204
2	60	Male	0.907327
2	61	Female	0.900608
2	61	Male	0.906736
2	62	Female	0.900012
2	62	Male	0.906143
2	63	Female	0.899415
2	63	Male	0.905551
2	64	Female	0.898819
2	64	Male	0.904958
2	65	Female	0.898222
2	65	Male	0.904365
2	66	Female	0.897624
2	66	Male	0.903771
2	67	Female	0.897026
2	67	Male	0.903177
2	68	Female	0.896428
2	68	Male	0.902582
2	69	Female	0.89583
2	69	Male	0.901987
2	70	Female	0.895232
2	70	Male	0.901392
2	71	Female	0.894633
2	71	Male	0.900796
2	72	Female	0.894034
2	72	Male	0.9002
2	73	Female	0.893435
2	73	Male	0.899604
2	74	Female	0.892835
2	74	Male	0.899008
2	75	Female	0.892236
2	75	Male	0.898411
2	76	Female	0.891636
2	76	Male	0.897813
2	77	Female	0.891036
2	77	Male	0.897216
2	78	Female	0.890435
2	78	Male	0.896618
2	79	Female	0.889835
2	79	Male	0.89602
2	80	Female	0.889234
2	80	Male	0.895422
2	81	Female	0.888634
2	81	Male	0.894823
2	82	Female	0.888033
2	82	Male	0.894224
2	83	Female	0.887431
2	83	Male	0.893625
2	84	Female	0.88683
2	84	Male	0.893026
2	85	Female	0.886228
2	85	Male	0.892426
2	86	Female	0.885627
2	86	Male	0.891826
2	87	Female	0.885025
2	87	Male	0.891226
2	88	Female	0.884423
2	88	Male	0.890626
2	89	Female	0.883821
2	89	Male	0.890026
2	90	Female	0.883219
2	90	Male	0.889425
2	91	Female	0.882616
2	91	Male	0.888825
2	92	Female	0.882014
2	92	Male	0.888224
2	93	Female	0.881411
2	93	Male	0.887622
2	94	Female	0.880808
2	94	Male	0.887021
2	95	Female	0.880206
2	95	Male	0.88642
2	96	Female	0.879603
2	96	Male	0.885818
2	97	Female	0.879
2	97	Male	0.885216
2	98	Female	0.878396
2	98	Male	0.884614
2	99	Female	0.877793
2	99	Male	0.884012
3	18	Female	0.910606
3	18	Male	0.916527
3	19	Female	0.910012
3	19	Male	0.915942
3	20	Female	0.909418
3	20	Male	0.915355
3	21	Female	0.908822
3	21	Male	0.914768
3	22	Female	0.908227
3	22	Male	0.914179
3	23	Female	0.90763
3	23	Male	0.91359
3	24	Female	0.907033
3	24	Male	0.913001
3	25	Female	0.906436
3	25	Male	0.91241
3	26	Female	0.905838
3	26	Male	0.911819
3	27	Female	0.905239
3	27	Male	0.911227
3	28	Female	0.90464
3	28	Male	0.910634
3	29	Female	0.90404
3	29	Male	0.910041
3	30	Female	0.90344
3	30	Male	0.909446
3	31	Female	0.90284
3	31	Male	0.908852
3	32	Female	0.902239
3	32	Male	0.908256
3	33	Female	0.901637
3	33	Male	0.90766
3	34	Female	0.901035
3	34	Male	0.907064
3	35	Female	0.900433
3	35	Male	0.906467
3	36	Female	0.89983
3	36	Male	0.905869
3	37	Female	0.899227
3	37	Male	0.905271
3	38	Female	0.898623
3	38	Male	0.904672
3	39	Female	0.898019
3	39	Male	0.904073
3	40	Female	0.897415
3	40	Male	0.903473
3	41	Female	0.89681
3	41	Male	0.902873
3	42	Female	0.896205
3	42	Male	0.902272
3	43	Female	0.8956
3	43	Male	0.901671
3	44	Female	0.894994
3	44	Male	0.901069
3	45	Female	0.894388
3	45	Male	0.900467
3	46	Female	0.893782
3	46	Male	0.899864
3	47	Female	0.893175
3	47	Male	0.899261
3	48	Female	0.892568
3	48	Male	0.898658
3	49	Female	0.891961
3	49	Male	0.898054
3	50	Female	0.891353
3	50	Male	0.89745
3	51	Female	0.890746
3	51	Male	0.896845
3	52	Female	0.890137
3	52	Male	0.896241
3	53	Female	0.889529
3	53	Male	0.895635
3	54	Female	0.888921
3	54	Male	0.89503
3	55	Female	0.888312
3	55	Male	0.894424
3	56	Female	0.887703
3	56	Male	0.893818
3	57	Female	0.887093
3	57	Male	0.893211
3	58	Female	0.886484
3	58	Male	0.892604
3	59	Female	0.885874
3	59	Male	0.891997
3	60	Female	0.885264
3	60	Male	0.89139
3	61	Female	0.884654
3	61	Male	0.890782
3	62	Female	0.884044
3	62	Male	0.890174
3	63	Female	0.883433
3	63	Male	0.889566
3	64	Female	0.882822
3	64	Male	0.888957
3	65	Female	0.882211
3	65	Male	0.888348
3	66	Female	0.8816
3	66	Male	0.887739
3	67	Female	0.880989
3	67	Male	0.88713
3	68	Female	0.880378
3	68	Male	0.886521
3	69	Female	0.879766
3	69	Male	0.885911
3	70	Female	0.879154
3	70	Male	0.885301
3	71	Female	0.878542
3	71	Male	0.884691
3	72	Female	0.87793
3	72	Male	0.88408
3	73	Female	0.877318
3	73	Male	0.88347
3	74	Female	0.876705
3	74	Male	0.882859
3	75	Female	0.876093
3	75	Male	0.882248
3	76	Female	0.87548
3	76	Male	0.881637
3	77	Female	0.874867
3	77	Male	0.881026
3	78	Female	0.874254
3	78	Male	0.880414
3	79	Female	0.873641
3	79	Male	0.879803
3	80	Female	0.873028
3	80	Male	0.879191
3	81	Female	0.872415
3	81	Male	0.878579
3	82	Female	0.871801
3	82	Male	0.877967
3	83	Female	0.871188
3	83	Male	0.877355
3	84	Female	0.870574
3	84	Male	0.876742
3	85	Female	0.86996
3	85	Male	0.87613
3	86	Female	0.869347
3	86	Male	0.875517
3	87	Female	0.868733
3	87	Male	0.874904
3	88	Female	0.868118
3	88	Male	0.874291
3	89	Female	0.867504
3	89	Male	0.873678
3	90	Female	0.86689
3	90	Male	0.873065
3	91	Female	0.866276
3	91	Male	0.872452
3	92	Female	0.865661
3	92	Male	0.871838
3	93	Female	0.865047
3	93	Male	0.871225
3	94	Female	0.864432
3	94	Male	0.870611
3	95	Female	0.863817
3	95	Male	0.869997
3	96	Female	0.863202
3	96	Male	0.869383
3	97	Female	0.862588
3	97	Male	0.868769
3	98	Female	0.861973
3	98	Male	0.868155
3	99	Female	0.861358
3	99	Male	0.867541
4	18	Female	0.895546
4	18	Male	0.90152
4	19	Female	0.894933
4	19	Male	0.900913
4	20	Female	0.89432
4	20	Male	0.900304
4	21	Female	0.893707
4	21	Male	0.899696
4	22	Female	0.893093
4	22	Male	0.899087
4	23	Female	0.892479
4	23	Male	0.898477
4	24	Female	0.891865
4	24	Male	0.897867
4	25	Female	0.89125
4	25	Male	0.897256
4	26	Female	0.890635
4	26	Male	0.896645
4	27	Female	0.890019
4	27	Male	0.896033
4	28	Female	0.889403
4	28	Male	0.895421
4	29	Female	0.888787
4	29	Male	0.894809
4	30	Female	0.88817
4	30	Male	0.894196
4	31	Female	0.887554
4	31	Male	0.893582
4	32	Female	0.886936
4	32	Male	0.892969
4	33	Female	0.886319
4	33	Male	0.892355
4	34	Female	0.885701
4	34	Male	0.89174
4	35	Female	0.885083
4	35	Male	0.891126
4	36	Female	0.884465
4	36	Male	0.89051
4	37	Female	0.883847
4	37	Male	0.889895
4	38	Female	0.883228
4	38	Male	0.889279
4	39	Female	0.882609
4	39	Male	0.888663
4	40	Female	0.881989
4	40	Male	0.888046
4	41	Female	0.88137
4	41	Male	0.88743
4	42	Female	0.88075
4	42	Male	0.886812
4	43	Female	0.88013
4	43	Male	0.886195
4	44	Female	0.87951
4	44	Male	0.885577
4	45	Female	0.878889
4	45	Male	0.884959
4	46	Female	0.878269
4	46	Male	0.884341
4	47	Female	0.877648
4	47	Male	0.883723
4	48	Female	0.877027
4	48	Male	0.883104
4	49	Female	0.876405
4	49	Male	0.882485
4	50	Female	0.875784
4	50	Male	0.881865
4	51	Female	0.875162
4	51	Male	0.881246
4	52	Female	0.87454
4	52	Male	0.880626
4	53	Female	0.873918
4	53	Male	0.880006
4	54	Female	0.873296
4	54	Male	0.879386
4	55	Female	0.872674
4	55	Male	0.878765
4	56	Female	0.872051
4	56	Male	0.878145
4	57	Female	0.871429
4	57	Male	0.877524
4	58	Female	0.870806
4	58	Male	0.876903
4	59	Female	0.870183
4	59	Male	0.876281
4	60	Female	0.869559
4	60	Male	0.87566
4	61	Female	0.868936
4	61	Male	0.875038
4	62	Female	0.868313
4	62	Male	0.874416
4	63	Female	0.867689
4	63	Male	0.873794
4	64	Female	0.867065
4	64	Male	0.873172
4	65	Female	0.866441
4	65	Male	0.872549
4	66	Female	0.865817
4	66	Male	0.871927
4	67	Female	0.865193
4	67	Male	0.871304
4	68	Female	0.864569
4	68	Male	0.870681
4	69	Female	0.863944
4	69	Male	0.870058
4	70	Female	0.86332
4	70	Male	0.869435
4	71	Female	0.862695
4	71	Male	0.868811
4	72	Female	0.86207
4	72	Male	0.868188
4	73	Female	0.861445
4	73	Male	0.867564
4	74	Female	0.86082
4	74	Male	0.86694
4	75	Female	0.860195
4	75	Male	0.866316
4	76	Female	0.85957
4	76	Male	0.865692
4	77	Female	0.858945
4	77	Male	0.865068
4	78	Female	0.858319
4	78	Male	0.864444
4	79	Female	0.857694
4	79	Male	0.863819
4	80	Female	0.857068
4	80	Male	0.863195
4	81	Female	0.856442
4	81	Male	0.86257
4	82	Female	0.855817
4	82	Male	0.861945
4	83	Female	0.855191
4	83	Male	0.86132
4	84	Female	0.854565
4	84	Male	0.860695
4	85	Female	0.853939
4	85	Male	0.86007
4	86	Female	0.853312
4	86	Male	0.859445
4	87	Female	0.852686
4	87	Male	0.858819
4	88	Female	0.85206
4	88	Male	0.858194
4	89	Female	0.851433
4	89	Male	0.857568
4	90	Female	0.850807
4	90	Male	0.856943
4	91	Female	0.85018
4	91	Male	0.856317
4	92	Female	0.849554
4	92	Male	0.855691
4	93	Female	0.848927
4	93	Male	0.855065
4	94	Female	0.8483
4	94	Male	0.854439
4	95	Female	0.847674
4	95	Male	0.853813
4	96	Female	0.847047
4	96	Male	0.853187
4	97	Female	0.84642
4	97	Male	0.85256
4	98	Female	0.845793
4	98	Male	0.851934
4	99	Female	0.845166
4	99	Male	0.851308
5	18	Female	0.8809
5	18	Male	0.886878
5	19	Female	0.880272
5	19	Male	0.886253
5	20	Female	0.879644
5	20	Male	0.885628
5	21	Female	0.879016
5	21	Male	0.885002
5	22	Female	0.878387
5	22	Male	0.884377
5	23	Female	0.877758
5	23	Male	0.883751
5	24	Female	0.877128
5	24	Male	0.883124
5	25	Female	0.876499
5	25	Male	0.882497
5	26	Female	0.875869
5	26	Male	0.88187
5	27	Female	0.875239
5	27	Male	0.881243
5	28	Female	0.874608
5	28	Male	0.880615
5	29	Female	0.873978
5	29	Male	0.879987
5	30	Female	0.873347
5	30	Male	0.879359
5	31	Female	0.872716
5	31	Male	0.87873
5	32	Female	0.872084
5	32	Male	0.878101
5	33	Female	0.871453
5	33	Male	0.877472
5	34	Female	0.870821
5	34	Male	0.876843
5	35	Female	0.870189
5	35	Male	0.876213
5	36	Female	0.869557
5	36	Male	0.875583
5	37	Female	0.868925
5	37	Male	0.874953
5	38	Female	0.868292
5	38	Male	0.874323
5	39	Female	0.867659
5	39	Male	0.873692
5	40	Female	0.867026
5	40	Male	0.873061
5	41	Female	0.866393
5	41	Male	0.87243
5	42	Female	0.86576
5	42	Male	0.871798
5	43	Female	0.865126
5	43	Male	0.871167
5	44	Female	0.864493
5	44	Male	0.870535
5	45	Female	0.863859
5	45	Male	0.869903
5	46	Female	0.863225
5	46	Male	0.869271
5	47	Female	0.862591
5	47	Male	0.868638
5	48	Female	0.861956
5	48	Male	0.868006
5	49	Female	0.861322
5	49	Male	0.867373
5	50	Female	0.860687
5	50	Male	0.86674
5	51	Female	0.860052
5	51	Male	0.866107
5	52	Female	0.859417
5	52	Male	0.865473
5	53	Female	0.858782
5	53	Male	0.86484
5	54	Female	0.858147
5	54	Male	0.864206
5	55	Female	0.857512
5	55	Male	0.863572
5	56	Female	0.856876
5	56	Male	0.862938
5	57	Female	0.856241
5	57	Male	0.862304
5	58	Female	0.855605
5	58	Male	0.861669
5	59	Female	0.854969
5	59	Male	0.861035
5	60	Female	0.854333
5	60	Male	0.8604
5	61	Female	0.853697
5	61	Male	0.859765
5	62	Female	0.85306
5	62	Male	0.85913
5	63	Female	0.852424
5	63	Male	0.858495
5	64	Female	0.851788
5	64	Male	0.85786
5	65	Female	0.851151
5	65	Male	0.857224
5	66	Female	0.850514
5	66	Male	0.856589
5	67	Female	0.849877
5	67	Male	0.855953
5	68	Female	0.849241
5	68	Male	0.855317
5	69	Female	0.848604
5	69	Male	0.854681
5	70	Female	0.847966
5	70	Male	0.854045
5	71	Female	0.847329
5	71	Male	0.853409
5	72	Female	0.846692
5	72	Male	0.852772
5	73	Female	0.846055
5	73	Male	0.852136
5	74	Female	0.845417
5	74	Male	0.851499
5	75	Female	0.844779
5	75	Male	0.850863
5	76	Female	0.844142
5	76	Male	0.850226
5	77	Female	0.843504
5	77	Male	0.849589
5	78	Female	0.842866
5	78	Male	0.848952
5	79	Female	0.842228
5	79	Male	0.848315
5	80	Female	0.84159
5	80	Male	0.847678
5	81	Female	0.840952
5	81	Male	0.847041
5	82	Female	0.840314
5	82	Male	0.846403
5	83	Female	0.839676
5	83	Male	0.845766
5	84	Female	0.839038
5	84	Male	0.845128
5	85	Female	0.838399
5	85	Male	0.844491
5	86	Female	0.837761
5	86	Male	0.843853
5	87	Female	0.837122
5	87	Male	0.843215
5	88	Female	0.836484
5	88	Male	0.842578
5	89	Female	0.835845
5	89	Male	0.84194
5	90	Female	0.835207
5	90	Male	0.841302
5	91	Female	0.834568
5	91	Male	0.840663
5	92	Female	0.833929
5	92	Male	0.840025
5	93	Female	0.83329
5	93	Male	0.839387
5	94	Female	0.832651
5	94	Male	0.838749
5	95	Female	0.832012
5	95	Male	0.83811
5	96	Female	0.831373
5	96	Male	0.837472
5	97	Female	0.830734
5	97	Male	0.836833
5	98	Female	0.830095
5	98	Male	0.836195
5	99	Female	0.829456
5	99	Male	0.835556
6	18	Female	0.866879
6	18	Male	0.872842
6	19	Female	0.866237
6	19	Male	0.872202
6	20	Female	0.865595
6	20	Male	0.871563
6	21	Female	0.864953
6	21	Male	0.870923
6	22	Female	0.864311
6	22	Male	0.870283
6	23	Female	0.863668
6	23	Male	0.869642
6	24	Female	0.863025
6	24	Male	0.869001
6	25	Female	0.862382
6	25	Male	0.868361
6	26	Female	0.861738
6	26	Male	0.867719
6	27	Female	0.861095
6	27	Male	0.867078
6	28	Female	0.860451
6	28	Male	0.866436
6	29	Female	0.859807
6	29	Male	0.865794
6	30	Female	0.859163
6	30	Male	0.865152
6	31	Female	0.858519
6	31	Male	0.86451
6	32	Female	0.857874
6	32	Male	0.863867
6	33	Female	0.857229
6	33	Male	0.863224
6	34	Female	0.856584
6	34	Male	0.862581
6	35	Female	0.855939
6	35	Male	0.861938
6	36	Female	0.855294
6	36	Male	0.861295
6	37	Female	0.854649
6	37	Male	0.860651
6	38	Female	0.854003
6	38	Male	0.860007
6	39	Female	0.853358
6	39	Male	0.859363
6	40	Female	0.852712
6	40	Male	0.858719
6	41	Female	0.852066
6	41	Male	0.858074
6	42	Female	0.85142
6	42	Male	0.85743
6	43	Female	0.850773
6	43	Male	0.856785
6	44	Female	0.850127
6	44	Male	0.85614
6	45	Female	0.84948
6	45	Male	0.855495
6	46	Female	0.848833
6	46	Male	0.85485
6	47	Female	0.848187
6	47	Male	0.854204
6	48	Female	0.84754
6	48	Male	0.853559
6	49	Female	0.846892
6	49	Male	0.852913
6	50	Female	0.846245
6	50	Male	0.852267
6	51	Female	0.845598
6	51	Male	0.851621
6	52	Female	0.84495
6	52	Male	0.850975
6	53	Female	0.844303
6	53	Male	0.850328
6	54	Female	0.843655
6	54	Male	0.849682
6	55	Female	0.843007
6	55	Male	0.849035
6	56	Female	0.842359
6	56	Male	0.848388
6	57	Female	0.841711
6	57	Male	0.847741
6	58	Female	0.841063
6	58	Male	0.847094
6	59	Female	0.840415
6	59	Male	0.846447
6	60	Female	0.839766
6	60	Male	0.8458
6	61	Female	0.839118
6	61	Male	0.845152
6	62	Female	0.838469
6	62	Male	0.844505
6	63	Female	0.837821
6	63	Male	0.843857
6	64	Female	0.837172
6	64	Male	0.843209
6	65	Female	0.836523
6	65	Male	0.842561
6	66	Female	0.835874
6	66	Male	0.841913
6	67	Female	0.835225
6	67	Male	0.841265
6	68	Female	0.834576
6	68	Male	0.840617
6	69	Female	0.833927
6	69	Male	0.839969
6	70	Female	0.833278
6	70	Male	0.83932
6	71	Female	0.832628
6	71	Male	0.838672
6	72	Female	0.831979
6	72	Male	0.838023
6	73	Female	0.831329
6	73	Male	0.837375
6	74	Female	0.83068
6	74	Male	0.836726
6	75	Female	0.83003
6	75	Male	0.836077
6	76	Female	0.829381
6	76	Male	0.835428
6	77	Female	0.828731
6	77	Male	0.834779
6	78	Female	0.828081
6	78	Male	0.83413
6	79	Female	0.827431
6	79	Male	0.833481
6	80	Female	0.826781
6	80	Male	0.832831
6	81	Female	0.826131
6	81	Male	0.832182
6	82	Female	0.825481
6	82	Male	0.831532
6	83	Female	0.824831
6	83	Male	0.830883
6	84	Female	0.824181
6	84	Male	0.830233
6	85	Female	0.82353
6	85	Male	0.829584
6	86	Female	0.82288
6	86	Male	0.828934
6	87	Female	0.82223
6	87	Male	0.828284
6	88	Female	0.821579
6	88	Male	0.827634
6	89	Female	0.820929
6	89	Male	0.826984
6	90	Female	0.820278
6	90	Male	0.826334
6	91	Female	0.819628
6	91	Male	0.825684
6	92	Female	0.818977
6	92	Male	0.825034
6	93	Female	0.818326
6	93	Male	0.824384
6	94	Female	0.817676
6	94	Male	0.823734
6	95	Female	0.817025
6	95	Male	0.823083
6	96	Female	0.816374
6	96	Male	0.822433
6	97	Female	0.815723
6	97	Male	0.821783
6	98	Female	0.815073
6	98	Male	0.821132
6	99	Female	0.814422
6	99	Male	0.820482
7	18	Female	0.85359
7	18	Male	0.859535
7	19	Female	0.852936
7	19	Male	0.858882
7	20	Female	0.852281
7	20	Male	0.858229
7	21	Female	0.851626
7	21	Male	0.857576
7	22	Female	0.850971
7	22	Male	0.856923
7	23	Female	0.850315
7	23	Male	0.85627
7	24	Female	0.84966
7	24	Male	0.855616
7	25	Female	0.849004
7	25	Male	0.854962
7	26	Female	0.848348
7	26	Male	0.854308
7	27	Female	0.847692
7	27	Male	0.853654
7	28	Female	0.847036
7	28	Male	0.852999
7	29	Female	0.84638
7	29	Male	0.852344
7	30	Female	0.845723
7	30	Male	0.85169
7	31	Female	0.845067
7	31	Male	0.851034
7	32	Female	0.84441
7	32	Male	0.850379
7	33	Female	0.843753
7	33	Male	0.849724
7	34	Female	0.843096
7	34	Male	0.849068
7	35	Female	0.842439
7	35	Male	0.848412
7	36	Female	0.841781
7	36	Male	0.847756
7	37	Female	0.841124
7	37	Male	0.8471
7	38	Female	0.840466
7	38	Male	0.846444
7	39	Female	0.839808
7	39	Male	0.845788
7	40	Female	0.83915
7	40	Male	0.845131
7	41	Female	0.838492
7	41	Male	0.844474
7	42	Female	0.837834
7	42	Male	0.843817
7	43	Female	0.837176
7	43	Male	0.84316
7	44	Female	0.836518
7	44	Male	0.842503
7	45	Female	0.835859
7	45	Male	0.841846
7	46	Female	0.8352
7	46	Male	0.841189
7	47	Female	0.834542
7	47	Male	0.840531
7	48	Female	0.833883
7	48	Male	0.839873
7	49	Female	0.833224
7	49	Male	0.839215
7	50	Female	0.832565
7	50	Male	0.838557
7	51	Female	0.831906
7	51	Male	0.837899
7	52	Female	0.831246
7	52	Male	0.837241
7	53	Female	0.830587
7	53	Male	0.836583
7	54	Female	0.829928
7	54	Male	0.835924
7	55	Female	0.829268
7	55	Male	0.835266
7	56	Female	0.828609
7	56	Male	0.834607
7	57	Female	0.827949
7	57	Male	0.833948
7	58	Female	0.827289
7	58	Male	0.833289
7	59	Female	0.826629
7	59	Male	0.83263
7	60	Female	0.825969
7	60	Male	0.831971
7	61	Female	0.825309
7	61	Male	0.831312
7	62	Female	0.824649
7	62	Male	0.830653
7	63	Female	0.823989
7	63	Male	0.829994
7	64	Female	0.823329
7	64	Male	0.829334
7	65	Female	0.822669
7	65	Male	0.828675
7	66	Female	0.822008
7	66	Male	0.828015
7	67	Female	0.821348
7	67	Male	0.827355
7	68	Female	0.820687
7	68	Male	0.826695
7	69	Female	0.820027
7	69	Male	0.826035
7	70	Female	0.819366
7	70	Male	0.825375
7	71	Female	0.818705
7	71	Male	0.824715
7	72	Female	0.818044
7	72	Male	0.824055
7	73	Female	0.817384
7	73	Male	0.823395
7	74	Female	0.816723
7	74	Male	0.822735
7	75	Female	0.816062
7	75	Male	0.822074
7	76	Female	0.815401
7	76	Male	0.821414
7	77	Female	0.81474
7	77	Male	0.820754
7	78	Female	0.814079
7	78	Male	0.820093
7	79	Female	0.813417
7	79	Male	0.819432
7	80	Female	0.812756
7	80	Male	0.818772
7	81	Female	0.812095
7	81	Male	0.818111
7	82	Female	0.811434
7	82	Male	0.81745
7	83	Female	0.810772
7	83	Male	0.816789
7	84	Female	0.810111
7	84	Male	0.816128
7	85	Female	0.809449
7	85	Male	0.815467
7	86	Female	0.808788
7	86	Male	0.814806
7	87	Female	0.808126
7	87	Male	0.814145
7	88	Female	0.807465
7	88	Male	0.813484
7	89	Female	0.806803
7	89	Male	0.812823
7	90	Female	0.806142
7	90	Male	0.812162
7	91	Female	0.80548
7	91	Male	0.8115
7	92	Female	0.804818
7	92	Male	0.810839
7	93	Female	0.804156
7	93	Male	0.810178
7	94	Female	0.803495
7	94	Male	0.809516
7	95	Female	0.802833
7	95	Male	0.808855
7	96	Female	0.802171
7	96	Male	0.808193
7	97	Female	0.801509
7	97	Male	0.807532
7	98	Female	0.800847
7	98	Male	0.80687
7	99	Female	0.800185
7	99	Male	0.806209
8	18	Female	0.84106
8	18	Male	0.846987
8	19	Female	0.840394
8	19	Male	0.846323
8	20	Female	0.839727
8	20	Male	0.845658
8	21	Female	0.839061
8	21	Male	0.844993
8	22	Female	0.838394
8	22	Male	0.844328
8	23	Female	0.837727
8	23	Male	0.843663
8	24	Female	0.83706
8	24	Male	0.842997
8	25	Female	0.836393
8	25	Male	0.842332
8	26	Female	0.835726
8	26	Male	0.841666
8	27	Female	0.835059
8	27	Male	0.841
8	28	Female	0.834391
8	28	Male	0.840334
8	29	Female	0.833723
8	29	Male	0.839667
8	30	Female	0.833056
8	30	Male	0.839001
8	31	Female	0.832388
8	31	Male	0.838334
8	32	Female	0.83172
8	32	Male	0.837668
8	33	Female	0.831052
8	33	Male	0.837001
8	34	Female	0.830383
8	34	Male	0.836334
8	35	Female	0.829715
8	35	Male	0.835666
8	36	Female	0.829046
8	36	Male	0.834999
8	37	Female	0.828378
8	37	Male	0.834332
8	38	Female	0.827709
8	38	Male	0.833664
8	39	Female	0.82704
8	39	Male	0.832996
8	40	Female	0.826372
8	40	Male	0.832329
8	41	Female	0.825703
8	41	Male	0.831661
8	42	Female	0.825033
8	42	Male	0.830993
8	43	Female	0.824364
8	43	Male	0.830324
8	44	Female	0.823695
8	44	Male	0.829656
8	45	Female	0.823026
8	45	Male	0.828988
8	46	Female	0.822356
8	46	Male	0.828319
8	47	Female	0.821687
8	47	Male	0.827651
8	48	Female	0.821017
8	48	Male	0.826982
8	49	Female	0.820347
8	49	Male	0.826313
8	50	Female	0.819678
8	50	Male	0.825644
8	51	Female	0.819008
8	51	Male	0.824975
8	52	Female	0.818338
8	52	Male	0.824306
8	53	Female	0.817668
8	53	Male	0.823637
8	54	Female	0.816998
8	54	Male	0.822967
8	55	Female	0.816327
8	55	Male	0.822298
8	56	Female	0.815657
8	56	Male	0.821628
8	57	Female	0.814987
8	57	Male	0.820959
8	58	Female	0.814317
8	58	Male	0.820289
8	59	Female	0.813646
8	59	Male	0.81962
8	60	Female	0.812976
8	60	Male	0.81895
8	61	Female	0.812305
8	61	Male	0.81828
8	62	Female	0.811634
8	62	Male	0.81761
8	63	Female	0.810964
8	63	Male	0.81694
8	64	Female	0.810293
8	64	Male	0.81627
8	65	Female	0.809622
8	65	Male	0.815599
8	66	Female	0.808951
8	66	Male	0.814929
8	67	Female	0.80828
8	67	Male	0.814259
8	68	Female	0.80761
8	68	Male	0.813589
8	69	Female	0.806939
8	69	Male	0.812918
8	70	Female	0.806267
8	70	Male	0.812248
8	71	Female	0.805596
8	71	Male	0.811577
8	72	Female	0.804925
8	72	Male	0.810906
8	73	Female	0.804254
8	73	Male	0.810236
8	74	Female	0.803583
8	74	Male	0.809565
8	75	Female	0.802912
8	75	Male	0.808894
8	76	Female	0.80224
8	76	Male	0.808223
8	77	Female	0.801569
8	77	Male	0.807552
8	78	Female	0.800897
8	78	Male	0.806881
8	79	Female	0.800226
8	79	Male	0.80621
8	80	Female	0.799554
8	80	Male	0.805539
8	81	Female	0.798883
8	81	Male	0.804868
8	82	Female	0.798211
8	82	Male	0.804197
8	83	Female	0.79754
8	83	Male	0.803526
8	84	Female	0.796868
8	84	Male	0.802855
8	85	Female	0.796197
8	85	Male	0.802183
8	86	Female	0.795525
8	86	Male	0.801512
8	87	Female	0.794853
8	87	Male	0.800841
8	88	Female	0.794181
8	88	Male	0.800169
8	89	Female	0.79351
8	89	Male	0.799498
8	90	Female	0.792838
8	90	Male	0.798826
8	91	Female	0.792166
8	91	Male	0.798155
8	92	Female	0.791494
8	92	Male	0.797483
8	93	Female	0.790822
8	93	Male	0.796811
8	94	Female	0.79015
8	94	Male	0.79614
8	95	Female	0.789478
8	95	Male	0.795468
8	96	Female	0.788806
8	96	Male	0.794796
8	97	Female	0.788134
8	97	Male	0.794125
8	98	Female	0.787462
8	98	Male	0.793453
8	99	Female	0.78679
8	99	Male	0.792781
9	18	Female	0.829251
9	18	Male	0.835164
9	19	Female	0.828574
9	19	Male	0.834489
9	20	Female	0.827898
9	20	Male	0.833813
9	21	Female	0.827221
9	21	Male	0.833138
9	22	Female	0.826544
9	22	Male	0.832462
9	23	Female	0.825867
9	23	Male	0.831786
9	24	Female	0.82519
9	24	Male	0.83111
9	25	Female	0.824513
9	25	Male	0.830434
9	26	Female	0.823835
9	26	Male	0.829758
9	27	Female	0.823158
9	27	Male	0.829082
9	28	Female	0.82248
9	28	Male	0.828405
9	29	Female	0.821802
9	29	Male	0.827728
9	30	Female	0.821125
9	30	Male	0.827052
9	31	Female	0.820447
9	31	Male	0.826375
9	32	Female	0.819769
9	32	Male	0.825698
9	33	Female	0.819091
9	33	Male	0.825021
9	34	Female	0.818412
9	34	Male	0.824344
9	35	Female	0.817734
9	35	Male	0.823666
9	36	Female	0.817056
9	36	Male	0.822989
9	37	Female	0.816377
9	37	Male	0.822311
9	38	Female	0.815699
9	38	Male	0.821634
9	39	Female	0.81502
9	39	Male	0.820956
9	40	Female	0.814342
9	40	Male	0.820278
9	41	Female	0.813663
9	41	Male	0.8196
9	42	Female	0.812984
9	42	Male	0.818922
9	43	Female	0.812305
9	43	Male	0.818244
9	44	Female	0.811626
9	44	Male	0.817566
9	45	Female	0.810947
9	45	Male	0.816887
9	46	Female	0.810268
9	46	Male	0.816209
9	47	Female	0.809589
9	47	Male	0.815531
9	48	Female	0.80891
9	48	Male	0.814852
9	49	Female	0.80823
9	49	Male	0.814173
9	50	Female	0.807551
9	50	Male	0.813495
9	51	Female	0.806872
9	51	Male	0.812816
9	52	Female	0.806192
9	52	Male	0.812137
9	53	Female	0.805513
9	53	Male	0.811458
9	54	Female	0.804833
9	54	Male	0.810779
9	55	Female	0.804153
9	55	Male	0.8101
9	56	Female	0.803474
9	56	Male	0.809421
9	57	Female	0.802794
9	57	Male	0.808742
9	58	Female	0.802114
9	58	Male	0.808063
9	59	Female	0.801434
9	59	Male	0.807383
9	60	Female	0.800754
9	60	Male	0.806704
9	61	Female	0.800074
9	61	Male	0.806025
9	62	Female	0.799394
9	62	Male	0.805345
9	63	Female	0.798714
9	63	Male	0.804666
9	64	Female	0.798034
9	64	Male	0.803986
9	65	Female	0.797354
9	65	Male	0.803306
9	66	Female	0.796674
9	66	Male	0.802627
9	67	Female	0.795994
9	67	Male	0.801947
9	68	Female	0.795313
9	68	Male	0.801267
9	69	Female	0.794633
9	69	Male	0.800587
9	70	Female	0.793953
9	70	Male	0.799907
9	71	Female	0.793272
9	71	Male	0.799227
9	72	Female	0.792592
9	72	Male	0.798547
9	73	Female	0.791912
9	73	Male	0.797867
9	74	Female	0.791231
9	74	Male	0.797187
9	75	Female	0.790551
9	75	Male	0.796507
9	76	Female	0.78987
9	76	Male	0.795827
9	77	Female	0.78919
9	77	Male	0.795147
9	78	Female	0.788509
9	78	Male	0.794466
9	79	Female	0.787828
9	79	Male	0.793786
9	80	Female	0.787148
9	80	Male	0.793106
9	81	Female	0.786467
9	81	Male	0.792426
9	82	Female	0.785786
9	82	Male	0.791745
9	83	Female	0.785106
9	83	Male	0.791065
9	84	Female	0.784425
9	84	Male	0.790384
9	85	Female	0.783744
9	85	Male	0.789704
9	86	Female	0.783063
9	86	Male	0.789023
9	87	Female	0.782383
9	87	Male	0.788343
9	88	Female	0.781702
9	88	Male	0.787662
9	89	Female	0.781021
9	89	Male	0.786982
9	90	Female	0.78034
9	90	Male	0.786301
9	91	Female	0.779659
9	91	Male	0.78562
9	92	Female	0.778978
9	92	Male	0.78494
9	93	Female	0.778297
9	93	Male	0.784259
9	94	Female	0.777616
9	94	Male	0.783578
9	95	Female	0.776935
9	95	Male	0.782897
9	96	Female	0.776254
9	96	Male	0.782217
9	97	Female	0.775573
9	97	Male	0.781536
9	98	Female	0.774892
9	98	Male	0.780855
9	99	Female	0.774211
9	99	Male	0.780174
10	18	Female	0.818086
10	18	Male	0.823987
10	19	Female	0.817401
10	19	Male	0.823302
10	20	Female	0.816715
10	20	Male	0.822617
10	21	Female	0.816029
10	21	Male	0.821932
10	22	Female	0.815343
10	22	Male	0.821248
10	23	Female	0.814657
10	23	Male	0.820562
10	24	Female	0.813971
10	24	Male	0.819877
10	25	Female	0.813285
10	25	Male	0.819192
10	26	Female	0.812599
10	26	Male	0.818507
10	27	Female	0.811913
10	27	Male	0.817821
10	28	Female	0.811226
10	28	Male	0.817136
10	29	Female	0.81054
10	29	Male	0.81645
10	30	Female	0.809853
10	30	Male	0.815764
10	31	Female	0.809166
10	31	Male	0.815078
10	32	Female	0.80848
10	32	Male	0.814392
10	33	Female	0.807793
10	33	Male	0.813706
10	34	Female	0.807106
10	34	Male	0.81302
10	35	Female	0.806419
10	35	Male	0.812334
10	36	Female	0.805732
10	36	Male	0.811648
10	37	Female	0.805045
10	37	Male	0.810961
10	38	Female	0.804358
10	38	Male	0.810275
10	39	Female	0.803671
10	39	Male	0.809588
10	40	Female	0.802984
10	40	Male	0.808902
10	41	Female	0.802296
10	41	Male	0.808215
10	42	Female	0.801609
10	42	Male	0.807528
10	43	Female	0.800922
10	43	Male	0.806842
10	44	Female	0.800234
10	44	Male	0.806155
10	45	Female	0.799547
10	45	Male	0.805468
10	46	Female	0.798859
10	46	Male	0.804781
10	47	Female	0.798171
10	47	Male	0.804094
10	48	Female	0.797484
10	48	Male	0.803407
10	49	Female	0.796796
10	49	Male	0.802719
10	50	Female	0.796108
10	50	Male	0.802032
10	51	Female	0.79542
10	51	Male	0.801345
10	52	Female	0.794733
10	52	Male	0.800658
10	53	Female	0.794045
10	53	Male	0.79997
10	54	Female	0.793357
10	54	Male	0.799283
10	55	Female	0.792669
10	55	Male	0.798595
10	56	Female	0.791981
10	56	Male	0.797908
10	57	Female	0.791293
10	57	Male	0.79722
10	58	Female	0.790605
10	58	Male	0.796533
10	59	Female	0.789917
10	59	Male	0.795845
10	60	Female	0.789228
10	60	Male	0.795157
10	61	Female	0.78854
10	61	Male	0.794469
10	62	Female	0.787852
10	62	Male	0.793782
10	63	Female	0.787164
10	63	Male	0.793094
10	64	Female	0.786475
10	64	Male	0.792406
10	65	Female	0.785787
10	65	Male	0.791718
10	66	Female	0.785099
10	66	Male	0.79103
10	67	Female	0.78441
10	67	Male	0.790342
10	68	Female	0.783722
10	68	Male	0.789654
10	69	Female	0.783033
10	69	Male	0.788966
10	70	Female	0.782345
10	70	Male	0.788278
10	71	Female	0.781656
10	71	Male	0.78759
10	72	Female	0.780968
10	72	Male	0.786901
10	73	Female	0.780279
10	73	Male	0.786213
10	74	Female	0.779591
10	74	Male	0.785525
10	75	Female	0.778902
10	75	Male	0.784837
10	76	Female	0.778214
10	76	Male	0.784148
10	77	Female	0.777525
10	77	Male	0.78346
10	78	Female	0.776836
10	78	Male	0.782772
10	79	Female	0.776148
10	79	Male	0.782083
10	80	Female	0.775459
10	80	Male	0.781395
10	81	Female	0.77477
10	81	Male	0.780706
10	82	Female	0.774082
10	82	Male	0.780018
10	83	Female	0.773393
10	83	Male	0.77933
10	84	Female	0.772704
10	84	Male	0.778641
10	85	Female	0.772016
10	85	Male	0.777952
10	86	Female	0.771327
10	86	Male	0.777264
10	87	Female	0.770638
10	87	Male	0.776575
10	88	Female	0.769949
10	88	Male	0.775887
10	89	Female	0.76926
10	89	Male	0.775198
10	90	Female	0.768572
10	90	Male	0.774509
10	91	Female	0.767883
10	91	Male	0.773821
10	92	Female	0.767194
10	92	Male	0.773132
10	93	Female	0.766505
10	93	Male	0.772443
10	94	Female	0.765816
10	94	Male	0.771755
10	95	Female	0.765127
10	95	Male	0.771066
10	96	Female	0.764438
10	96	Male	0.770377
10	97	Female	0.76375
10	97	Male	0.769688
10	98	Female	0.763061
10	98	Male	0.769
10	99	Female	0.762372
10	99	Male	0.768311
11	18	Female	0.807468
11	18	Male	0.813356
11	19	Female	0.806775
11	19	Male	0.812663
11	20	Female	0.806081
11	20	Male	0.81197
11	21	Female	0.805388
11	21	Male	0.811278
11	22	Female	0.804694
11	22	Male	0.810585
11	23	Female	0.804
11	23	Male	0.809892
11	24	Female	0.803306
11	24	Male	0.809198
11	25	Female	0.802612
11	25	Male	0.808505
11	26	Female	0.801919
11	26	Male	0.807812
11	27	Female	0.801224
11	27	Male	0.807119
11	28	Female	0.80053
11	28	Male	0.806425
11	29	Female	0.799836
11	29	Male	0.805732
11	30	Female	0.799142
11	30	Male	0.805038
11	31	Female	0.798448
11	31	Male	0.804344
11	32	Female	0.797754
11	32	Male	0.803651
11	33	Female	0.797059
11	33	Male	0.802957
11	34	Female	0.796365
11	34	Male	0.802263
11	35	Female	0.79567
11	35	Male	0.801569
11	36	Female	0.794976
11	36	Male	0.800875
11	37	Female	0.794281
11	37	Male	0.800181
11	38	Female	0.793587
11	38	Male	0.799487
11	39	Female	0.792892
11	39	Male	0.798793
11	40	Female	0.792197
11	40	Male	0.798099
11	41	Female	0.791503
11	41	Male	0.797404
11	42	Female	0.790808
11	42	Male	0.79671
11	43	Female	0.790113
11	43	Male	0.796016
11	44	Female	0.789418
11	44	Male	0.795321
11	45	Female	0.788723
11	45	Male	0.794627
11	46	Female	0.788028
11	46	Male	0.793932
11	47	Female	0.787333
11	47	Male	0.793238
11	48	Female	0.786638
11	48	Male	0.792543
11	49	Female	0.785943
11	49	Male	0.791849
11	50	Female	0.785248
11	50	Male	0.791154
11	51	Female	0.784553
11	51	Male	0.79046
11	52	Female	0.783858
11	52	Male	0.789765
11	53	Female	0.783163
11	53	Male	0.78907
11	54	Female	0.782468
11	54	Male	0.788375
11	55	Female	0.781773
11	55	Male	0.787681
11	56	Female	0.781077
11	56	Male	0.786986
11	57	Female	0.780382
11	57	Male	0.786291
11	58	Female	0.779687
11	58	Male	0.785596
11	59	Female	0.778991
11	59	Male	0.784901
11	60	Female	0.778296
11	60	Male	0.784206
11	61	Female	0.777601
11	61	Male	0.783511
11	62	Female	0.776905
11	62	Male	0.782816
11	63	Female	0.77621
11	63	Male	0.782121
11	64	Female	0.775514
11	64	Male	0.781426
11	65	Female	0.774819
11	65	Male	0.780731
11	66	Female	0.774123
11	66	Male	0.780036
11	67	Female	0.773428
11	67	Male	0.779341
11	68	Female	0.772732
11	68	Male	0.778646
11	69	Female	0.772037
11	69	Male	0.777951
11	70	Female	0.771341
11	70	Male	0.777255
11	71	Female	0.770646
11	71	Male	0.77656
11	72	Female	0.76995
11	72	Male	0.775865
11	73	Female	0.769254
11	73	Male	0.77517
11	74	Female	0.768559
11	74	Male	0.774474
11	75	Female	0.767863
11	75	Male	0.773779
11	76	Female	0.767167
11	76	Male	0.773084
11	77	Female	0.766472
11	77	Male	0.772388
11	78	Female	0.765776
11	78	Male	0.771693
11	79	Female	0.76508
11	79	Male	0.770997
11	80	Female	0.764385
11	80	Male	0.770302
11	81	Female	0.763689
11	81	Male	0.769607
11	82	Female	0.762993
11	82	Male	0.768911
11	83	Female	0.762298
11	83	Male	0.768216
11	84	Female	0.761602
11	84	Male	0.76752
11	85	Female	0.760906
11	85	Male	0.766825
11	86	Female	0.760211
11	86	Male	0.766129
11	87	Female	0.759515
11	87	Male	0.765433
11	88	Female	0.758819
11	88	Male	0.764738
11	89	Female	0.758124
11	89	Male	0.764042
11	90	Female	0.757428
11	90	Male	0.763347
11	91	Female	0.756732
11	91	Male	0.762651
11	92	Female	0.756036
11	92	Male	0.761956
11	93	Female	0.755341
11	93	Male	0.76126
11	94	Female	0.754645
11	94	Male	0.760564
11	95	Female	0.753949
11	95	Male	0.759869
11	96	Female	0.753253
11	96	Male	0.759173
11	97	Female	0.752558
11	97	Male	0.758477
11	98	Female	0.751862
11	98	Male	0.757782
11	99	Female	0.751166
11	99	Male	0.757086
12	18	Female	0.797294
12	18	Male	0.803167
12	19	Female	0.796594
12	19	Male	0.802468
12	20	Female	0.795893
12	20	Male	0.801768
12	21	Female	0.795193
12	21	Male	0.801068
12	22	Female	0.794492
12	22	Male	0.800368
12	23	Female	0.793792
12	23	Male	0.799668
12	24	Female	0.793091
12	24	Male	0.798968
12	25	Female	0.792391
12	25	Male	0.798268
12	26	Female	0.79169
12	26	Male	0.797568
12	27	Female	0.790989
12	27	Male	0.796867
12	28	Female	0.790289
12	28	Male	0.796167
12	29	Female	0.789588
12	29	Male	0.795467
12	30	Female	0.788887
12	30	Male	0.794766
12	31	Female	0.788186
12	31	Male	0.794066
12	32	Female	0.787485
12	32	Male	0.793365
12	33	Female	0.786784
[truncated: 99,025 more rows]

## Sheet: G-R
GAD7	age	sex	G-R3
0	18	Female	0.942159
0	18	Male	0.951487
0	19	Female	0.941604
0	19	Male	0.951031
0	20	Female	0.941043
0	20	Male	0.950572
0	21	Female	0.940478
0	21	Male	0.95011
0	22	Female	0.939909
0	22	Male	0.949645
0	23	Female	0.939334
0	23	Male	0.949178
0	24	Female	0.938754
0	24	Male	0.948707
0	25	Female	0.938169
0	25	Male	0.948233
0	26	Female	0.937579
0	26	Male	0.947755
0	27	Female	0.936984
0	27	Male	0.947275
0	28	Female	0.936384
0	28	Male	0.946791
0	29	Female	0.935777
0	29	Male	0.946305
0	30	Female	0.935166
0	30	Male	0.945814
0	31	Female	0.934548
0	31	Male	0.945321
0	32	Female	0.933925
0	32	Male	0.944824
0	33	Female	0.933296
0	33	Male	0.944324
0	34	Female	0.93266
0	34	Male	0.94382
0	35	Female	0.932019
0	35	Male	0.943313
0	36	Female	0.931371
0	36	Male	0.942802
0	37	Female	0.930716
0	37	Male	0.942288
0	38	Female	0.930055
0	38	Male	0.941769
0	39	Female	0.929388
0	39	Male	0.941247
0	40	Female	0.928713
0	40	Male	0.940722
0	41	Female	0.928031
0	41	Male	0.940192
0	42	Female	0.927342
0	42	Male	0.939658
0	43	Female	0.926645
0	43	Male	0.939121
0	44	Female	0.925941
0	44	Male	0.938579
0	45	Female	0.925229
0	45	Male	0.938033
0	46	Female	0.92451
0	46	Male	0.937483
0	47	Female	0.923782
0	47	Male	0.936929
0	48	Female	0.923045
0	48	Male	0.93637
0	49	Female	0.922301
0	49	Male	0.935806
0	50	Female	0.921547
0	50	Male	0.935238
0	51	Female	0.920785
0	51	Male	0.934666
0	52	Female	0.920013
0	52	Male	0.934088
0	53	Female	0.919232
0	53	Male	0.933506
0	54	Female	0.918442
0	54	Male	0.932919
0	55	Female	0.917642
0	55	Male	0.932326
0	56	Female	0.916831
0	56	Male	0.931728
0	57	Female	0.916011
0	57	Male	0.931126
0	58	Female	0.915179
0	58	Male	0.930517
0	59	Female	0.914338
0	59	Male	0.929903
0	60	Female	0.913485
0	60	Male	0.929283
0	61	Female	0.91262
0	61	Male	0.928658
0	62	Female	0.911744
0	62	Male	0.928027
0	63	Female	0.910857
0	63	Male	0.927389
0	64	Female	0.909957
0	64	Male	0.926745
0	65	Female	0.909044
0	65	Male	0.926095
0	66	Female	0.908119
0	66	Male	0.925438
0	67	Female	0.907181
0	67	Male	0.924775
0	68	Female	0.90623
0	68	Male	0.924104
0	69	Female	0.905265
0	69	Male	0.923427
0	70	Female	0.904285
0	70	Male	0.922743
0	71	Female	0.903292
0	71	Male	0.922051
0	72	Female	0.902284
0	72	Male	0.921351
0	73	Female	0.901261
0	73	Male	0.920644
0	74	Female	0.900222
0	74	Male	0.919929
0	75	Female	0.899168
0	75	Male	0.919205
0	76	Female	0.898098
0	76	Male	0.918474
0	77	Female	0.897011
0	77	Male	0.917733
0	78	Female	0.895907
0	78	Male	0.916984
0	79	Female	0.894787
0	79	Male	0.916226
0	80	Female	0.893648
0	80	Male	0.915459
0	81	Female	0.892492
0	81	Male	0.914682
0	82	Female	0.891317
0	82	Male	0.913896
0	83	Female	0.890123
0	83	Male	0.913099
0	84	Female	0.888911
0	84	Male	0.912293
0	85	Female	0.887678
0	85	Male	0.911475
0	86	Female	0.886426
0	86	Male	0.910648
0	87	Female	0.885153
0	87	Male	0.909809
0	88	Female	0.883859
0	88	Male	0.908958
0	89	Female	0.882543
0	89	Male	0.908097
0	90	Female	0.881206
0	90	Male	0.907223
0	91	Female	0.879847
0	91	Male	0.906337
0	92	Female	0.878465
0	92	Male	0.905439
0	93	Female	0.877059
0	93	Male	0.904528
0	94	Female	0.87563
0	94	Male	0.903604
0	95	Female	0.874177
0	95	Male	0.902666
0	96	Female	0.872699
0	96	Male	0.901714
0	97	Female	0.871197
0	97	Male	0.900749
0	98	Female	0.869668
0	98	Male	0.899769
0	99	Female	0.868114
0	99	Male	0.898774
1	18	Female	0.928925
1	18	Male	0.939481
1	19	Female	0.928317
1	19	Male	0.938977
1	20	Female	0.927704
1	20	Male	0.938471
1	21	Female	0.927086
1	21	Male	0.937961
1	22	Female	0.926464
1	22	Male	0.937449
1	23	Female	0.925836
1	23	Male	0.936933
1	24	Female	0.925203
1	24	Male	0.936415
1	25	Female	0.924565
1	25	Male	0.935894
1	26	Female	0.923922
1	26	Male	0.93537
1	27	Female	0.923273
1	27	Male	0.934842
1	28	Female	0.922619
1	28	Male	0.934312
1	29	Female	0.921959
1	29	Male	0.933778
1	30	Female	0.921293
1	30	Male	0.933241
1	31	Female	0.920621
1	31	Male	0.932701
1	32	Female	0.919943
1	32	Male	0.932157
1	33	Female	0.919259
1	33	Male	0.93161
1	34	Female	0.918568
1	34	Male	0.93106
1	35	Female	0.917871
1	35	Male	0.930506
1	36	Female	0.917168
1	36	Male	0.929948
1	37	Female	0.916457
1	37	Male	0.929387
1	38	Female	0.915739
1	38	Male	0.928822
1	39	Female	0.915014
1	39	Male	0.928253
1	40	Female	0.914282
1	40	Male	0.927681
1	41	Female	0.913542
1	41	Male	0.927104
1	42	Female	0.912795
1	42	Male	0.926523
1	43	Female	0.912039
1	43	Male	0.925938
1	44	Female	0.911276
1	44	Male	0.925349
1	45	Female	0.910504
1	45	Male	0.924756
1	46	Female	0.909723
1	46	Male	0.924158
1	47	Female	0.908934
1	47	Male	0.923556
1	48	Female	0.908135
1	48	Male	0.922949
1	49	Female	0.907328
1	49	Male	0.922337
1	50	Female	0.906511
1	50	Male	0.92172
1	51	Female	0.905684
1	51	Male	0.921099
1	52	Female	0.904848
1	52	Male	0.920472
1	53	Female	0.904001
1	53	Male	0.91984
1	54	Female	0.903144
1	54	Male	0.919203
1	55	Female	0.902276
1	55	Male	0.918561
1	56	Female	0.901398
1	56	Male	0.917913
1	57	Female	0.900508
1	57	Male	0.917259
1	58	Female	0.899606
1	58	Male	0.916599
1	59	Female	0.898693
1	59	Male	0.915933
1	60	Female	0.897768
1	60	Male	0.915261
1	61	Female	0.89683
1	61	Male	0.914583
1	62	Female	0.89588
1	62	Male	0.913898
1	63	Female	0.894916
1	63	Male	0.913206
1	64	Female	0.89394
1	64	Male	0.912508
1	65	Female	0.892949
1	65	Male	0.911803
1	66	Female	0.891945
1	66	Male	0.91109
1	67	Female	0.890927
1	67	Male	0.91037
1	68	Female	0.889894
1	68	Male	0.909643
1	69	Female	0.888846
1	69	Male	0.908908
1	70	Female	0.887782
1	70	Male	0.908165
1	71	Female	0.886703
1	71	Male	0.907413
1	72	Female	0.885608
1	72	Male	0.906653
1	73	Female	0.884496
1	73	Male	0.905885
1	74	Female	0.883368
1	74	Male	0.905108
1	75	Female	0.882223
1	75	Male	0.904321
1	76	Female	0.881059
1	76	Male	0.903526
1	77	Female	0.879878
1	77	Male	0.902721
1	78	Female	0.878679
1	78	Male	0.901905
1	79	Female	0.877461
1	79	Male	0.90108
1	80	Female	0.876223
1	80	Male	0.900245
1	81	Female	0.874966
1	81	Male	0.899399
1	82	Female	0.87369
1	82	Male	0.898542
1	83	Female	0.872392
1	83	Male	0.897674
1	84	Female	0.871074
1	84	Male	0.896794
1	85	Female	0.869734
1	85	Male	0.895903
1	86	Female	0.868373
1	86	Male	0.895
1	87	Female	0.866989
1	87	Male	0.894084
1	88	Female	0.865583
1	88	Male	0.893156
1	89	Female	0.864154
1	89	Male	0.892214
1	90	Female	0.862701
1	90	Male	0.891259
1	91	Female	0.861225
1	91	Male	0.890291
1	92	Female	0.859724
1	92	Male	0.889309
1	93	Female	0.858197
1	93	Male	0.888312
1	94	Female	0.856646
1	94	Male	0.8873
1	95	Female	0.855069
1	95	Male	0.886274
1	96	Female	0.853465
1	96	Male	0.885232
1	97	Female	0.851835
1	97	Male	0.884174
1	98	Female	0.850177
1	98	Male	0.883099
1	99	Female	0.848491
1	99	Male	0.882009
2	18	Female	0.91488
2	18	Male	0.926521
2	19	Female	0.914232
2	19	Male	0.925979
2	20	Female	0.913579
2	20	Male	0.925435
2	21	Female	0.912921
2	21	Male	0.924888
2	22	Female	0.912258
2	22	Male	0.924338
2	23	Female	0.91159
2	23	Male	0.923786
2	24	Female	0.910917
2	24	Male	0.923231
2	25	Female	0.910238
2	25	Male	0.922672
2	26	Female	0.909554
2	26	Male	0.922111
2	27	Female	0.908864
2	27	Male	0.921547
2	28	Female	0.908169
2	28	Male	0.92098
2	29	Female	0.907467
2	29	Male	0.920409
2	30	Female	0.90676
2	30	Male	0.919836
2	31	Female	0.906046
2	31	Male	0.919259
2	32	Female	0.905325
2	32	Male	0.918679
2	33	Female	0.904598
2	33	Male	0.918095
2	34	Female	0.903864
2	34	Male	0.917508
2	35	Female	0.903124
2	35	Male	0.916917
2	36	Female	0.902376
2	36	Male	0.916323
2	37	Female	0.901621
2	37	Male	0.915725
2	38	Female	0.900858
2	38	Male	0.915123
2	39	Female	0.900088
2	39	Male	0.914517
2	40	Female	0.899309
2	40	Male	0.913907
2	41	Female	0.898523
2	41	Male	0.913293
2	42	Female	0.897728
2	42	Male	0.912675
2	43	Female	0.896924
2	43	Male	0.912052
2	44	Female	0.896112
2	44	Male	0.911425
2	45	Female	0.895291
2	45	Male	0.910793
2	46	Female	0.89446
2	46	Male	0.910157
2	47	Female	0.89362
2	47	Male	0.909516
2	48	Female	0.89277
2	48	Male	0.90887
2	49	Female	0.891911
2	49	Male	0.908219
2	50	Female	0.89104
2	50	Male	0.907562
2	51	Female	0.89016
2	51	Male	0.906901
2	52	Female	0.889268
2	52	Male	0.906234
2	53	Female	0.888366
2	53	Male	0.905561
2	54	Female	0.887452
2	54	Male	0.904883
2	55	Female	0.886526
2	55	Male	0.904198
2	56	Female	0.885589
2	56	Male	0.903508
2	57	Female	0.884639
2	57	Male	0.902811
2	58	Female	0.883676
2	58	Male	0.902108
2	59	Female	0.882701
2	59	Male	0.901398
2	60	Female	0.881712
2	60	Male	0.900682
2	61	Female	0.88071
2	61	Male	0.899958
2	62	Female	0.879694
2	62	Male	0.899227
2	63	Female	0.878664
2	63	Male	0.898489
2	64	Female	0.87762
2	64	Male	0.897744
2	65	Female	0.87656
2	65	Male	0.896991
2	66	Female	0.875485
2	66	Male	0.896229
2	67	Female	0.874395
2	67	Male	0.89546
2	68	Female	0.873288
2	68	Male	0.894682
2	69	Female	0.872165
2	69	Male	0.893895
2	70	Female	0.871026
2	70	Male	0.8931
2	71	Female	0.869869
2	71	Male	0.892296
2	72	Female	0.868695
2	72	Male	0.891482
2	73	Female	0.867503
2	73	Male	0.890658
2	74	Female	0.866293
2	74	Male	0.889825
2	75	Female	0.865064
2	75	Male	0.888981
2	76	Female	0.863816
2	76	Male	0.888127
2	77	Female	0.862549
2	77	Male	0.887263
2	78	Female	0.861261
2	78	Male	0.886387
2	79	Female	0.859953
2	79	Male	0.8855
2	80	Female	0.858625
2	80	Male	0.884602
2	81	Female	0.857275
2	81	Male	0.883691
2	82	Female	0.855904
2	82	Male	0.882769
2	83	Female	0.85451
2	83	Male	0.881834
2	84	Female	0.853095
2	84	Male	0.880886
2	85	Female	0.851656
2	85	Male	0.879925
2	86	Female	0.850194
2	86	Male	0.87895
2	87	Female	0.848708
2	87	Male	0.877962
2	88	Female	0.847198
2	88	Male	0.876959
2	89	Female	0.845663
2	89	Male	0.875942
2	90	Female	0.844103
2	90	Male	0.87491
2	91	Female	0.842517
2	91	Male	0.873863
2	92	Female	0.840905
2	92	Male	0.8728
2	93	Female	0.839267
2	93	Male	0.871721
2	94	Female	0.837602
2	94	Male	0.870626
2	95	Female	0.835909
2	95	Male	0.869514
2	96	Female	0.834189
2	96	Male	0.868384
2	97	Female	0.83244
2	97	Male	0.867237
2	98	Female	0.830662
2	98	Male	0.866072
2	99	Female	0.828856
2	99	Male	0.864889
3	18	Female	0.900392
3	18	Male	0.912901
3	19	Female	0.899716
3	19	Male	0.912332
3	20	Female	0.899036
3	20	Male	0.911761
3	21	Female	0.898351
3	21	Male	0.911187
3	22	Female	0.89766
3	22	Male	0.910611
3	23	Female	0.896964
3	23	Male	0.910032
3	24	Female	0.896263
3	24	Male	0.90945
3	25	Female	0.895556
3	25	Male	0.908865
3	26	Female	0.894843
3	26	Male	0.908277
3	27	Female	0.894124
3	27	Male	0.907687
3	28	Female	0.893399
3	28	Male	0.907093
3	29	Female	0.892668
3	29	Male	0.906496
3	30	Female	0.89193
3	30	Male	0.905896
3	31	Female	0.891185
3	31	Male	0.905292
3	32	Female	0.890433
3	32	Male	0.904685
3	33	Female	0.889675
3	33	Male	0.904075
3	34	Female	0.888909
3	34	Male	0.903461
3	35	Female	0.888135
3	35	Male	0.902843
3	36	Female	0.887354
3	36	Male	0.902221
3	37	Female	0.886565
3	37	Male	0.901596
3	38	Female	0.885768
3	38	Male	0.900966
3	39	Female	0.884962
3	39	Male	0.900332
3	40	Female	0.884148
3	40	Male	0.899695
3	41	Female	0.883325
3	41	Male	0.899052
3	42	Female	0.882493
3	42	Male	0.898405
3	43	Female	0.881651
3	43	Male	0.897754
3	44	Female	0.8808
3	44	Male	0.897098
3	45	Female	0.879939
3	45	Male	0.896437
3	46	Female	0.879068
3	46	Male	0.895771
3	47	Female	0.878186
3	47	Male	0.895099
3	48	Female	0.877294
3	48	Male	0.894423
3	49	Female	0.87639
3	49	Male	0.893741
3	50	Female	0.875476
3	50	Male	0.893053
3	51	Female	0.87455
3	51	Male	0.892359
3	52	Female	0.873612
3	52	Male	0.89166
3	53	Female	0.872662
3	53	Male	0.890954
3	54	Female	0.871699
3	54	Male	0.890242
3	55	Female	0.870724
3	55	Male	0.889523
3	56	Female	0.869735
3	56	Male	0.888798
3	57	Female	0.868733
3	57	Male	0.888066
3	58	Female	0.867717
3	58	Male	0.887326
3	59	Female	0.866687
3	59	Male	0.88658
3	60	Female	0.865643
3	60	Male	0.885826
3	61	Female	0.864584
3	61	Male	0.885064
3	62	Female	0.86351
3	62	Male	0.884294
3	63	Female	0.86242
3	63	Male	0.883516
3	64	Female	0.861314
3	64	Male	0.88273
3	65	Female	0.860192
3	65	Male	0.881935
3	66	Female	0.859053
3	66	Male	0.881131
3	67	Female	0.857898
3	67	Male	0.880318
3	68	Female	0.856725
3	68	Male	0.879495
3	69	Female	0.855534
3	69	Male	0.878663
3	70	Female	0.854325
3	70	Male	0.877821
3	71	Female	0.853097
3	71	Male	0.876969
3	72	Female	0.85185
3	72	Male	0.876106
3	73	Female	0.850584
3	73	Male	0.875233
3	74	Female	0.849299
3	74	Male	0.874348
3	75	Female	0.847992
3	75	Male	0.873453
3	76	Female	0.846666
3	76	Male	0.872545
3	77	Female	0.845318
3	77	Male	0.871626
3	78	Female	0.843949
3	78	Male	0.870694
3	79	Female	0.842558
3	79	Male	0.86975
3	80	Female	0.841144
3	80	Male	0.868792
3	81	Female	0.839708
3	81	Male	0.867822
3	82	Female	0.838249
3	82	Male	0.866838
3	83	Female	0.836766
3	83	Male	0.86584
3	84	Female	0.835259
3	84	Male	0.864827
3	85	Female	0.833727
3	85	Male	0.8638
3	86	Female	0.832171
3	86	Male	0.862758
3	87	Female	0.830589
3	87	Male	0.861701
3	88	Female	0.828982
3	88	Male	0.860628
3	89	Female	0.827348
3	89	Male	0.859538
3	90	Female	0.825688
3	90	Male	0.858432
3	91	Female	0.824
3	91	Male	0.857309
3	92	Female	0.822285
3	92	Male	0.856169
3	93	Female	0.820542
3	93	Male	0.855011
3	94	Female	0.818771
3	94	Male	0.853835
3	95	Female	0.816971
3	95	Male	0.852641
3	96	Female	0.815141
3	96	Male	0.851427
3	97	Female	0.813282
3	97	Male	0.850194
3	98	Female	0.811393
3	98	Male	0.848942
3	99	Female	0.809473
3	99	Male	0.847668
4	18	Female	0.885802
4	18	Male	0.898905
4	19	Female	0.885111
4	19	Male	0.898319
4	20	Female	0.884415
4	20	Male	0.897732
4	21	Female	0.883713
4	21	Male	0.897141
4	22	Female	0.883006
4	22	Male	0.896548
4	23	Female	0.882293
4	23	Male	0.895952
4	24	Female	0.881574
4	24	Male	0.895353
4	25	Female	0.880849
4	25	Male	0.894752
4	26	Female	0.880118
4	26	Male	0.894147
4	27	Female	0.87938
4	27	Male	0.89354
4	28	Female	0.878636
4	28	Male	0.892929
4	29	Female	0.877885
4	29	Male	0.892315
4	30	Female	0.877126
4	30	Male	0.891697
4	31	Female	0.876361
4	31	Male	0.891077
4	32	Female	0.875587
4	32	Male	0.890452
4	33	Female	0.874806
4	33	Male	0.889824
4	34	Female	0.874017
4	34	Male	0.889192
4	35	Female	0.87322
4	35	Male	0.888556
4	36	Female	0.872414
4	36	Male	0.887916
4	37	Female	0.8716
4	37	Male	0.887272
4	38	Female	0.870777
4	38	Male	0.886623
4	39	Female	0.869944
4	39	Male	0.885971
4	40	Female	0.869102
4	40	Male	0.885313
4	41	Female	0.86825
4	41	Male	0.884651
4	42	Female	0.867388
4	42	Male	0.883984
4	43	Female	0.866516
4	43	Male	0.883311
4	44	Female	0.865633
4	44	Male	0.882634
4	45	Female	0.86474
4	45	Male	0.881951
4	46	Female	0.863835
4	46	Male	0.881263
4	47	Female	0.862919
4	47	Male	0.880569
4	48	Female	0.861991
4	48	Male	0.879869
4	49	Female	0.86105
4	49	Male	0.879164
4	50	Female	0.860098
4	50	Male	0.878452
4	51	Female	0.859133
4	51	Male	0.877733
4	52	Female	0.858154
4	52	Male	0.877008
4	53	Female	0.857163
4	53	Male	0.876276
4	54	Female	0.856157
4	54	Male	0.875537
4	55	Female	0.855138
4	55	Male	0.874791
4	56	Female	0.854104
4	56	Male	0.874037
4	57	Female	0.853056
4	57	Male	0.873275
4	58	Female	0.851992
4	58	Male	0.872506
4	59	Female	0.850913
4	59	Male	0.871729
4	60	Female	0.849818
4	60	Male	0.870943
4	61	Female	0.848707
4	61	Male	0.870148
4	62	Female	0.847579
4	62	Male	0.869345
4	63	Female	0.846434
4	63	Male	0.868532
4	64	Female	0.845272
4	64	Male	0.86771
4	65	Female	0.844092
4	65	Male	0.866879
4	66	Female	0.842894
4	66	Male	0.866037
4	67	Female	0.841678
4	67	Male	0.865186
4	68	Female	0.840443
4	68	Male	0.864323
4	69	Female	0.839188
4	69	Male	0.86345
4	70	Female	0.837914
4	70	Male	0.862566
4	71	Female	0.83662
4	71	Male	0.861671
4	72	Female	0.835305
4	72	Male	0.860763
4	73	Female	0.833969
4	73	Male	0.859844
4	74	Female	0.832612
4	74	Male	0.858912
4	75	Female	0.831233
4	75	Male	0.857968
4	76	Female	0.829832
4	76	Male	0.857011
4	77	Female	0.828408
4	77	Male	0.85604
4	78	Female	0.826961
4	78	Male	0.855056
4	79	Female	0.825491
4	79	Male	0.854058
4	80	Female	0.823997
4	80	Male	0.853045
4	81	Female	0.822479
4	81	Male	0.852018
4	82	Female	0.820936
4	82	Male	0.850975
4	83	Female	0.819368
4	83	Male	0.849917
4	84	Female	0.817774
4	84	Male	0.848843
4	85	Female	0.816155
4	85	Male	0.847753
4	86	Female	0.814509
4	86	Male	0.846646
4	87	Female	0.812836
4	87	Male	0.845523
4	88	Female	0.811136
4	88	Male	0.844382
4	89	Female	0.809408
4	89	Male	0.843223
4	90	Female	0.807653
4	90	Male	0.842046
4	91	Female	0.805869
4	91	Male	0.84085
4	92	Female	0.804056
4	92	Male	0.839635
4	93	Female	0.802214
4	93	Male	0.838401
4	94	Female	0.800342
4	94	Male	0.837147
4	95	Female	0.79844
4	95	Male	0.835872
4	96	Female	0.796508
4	96	Male	0.834577
4	97	Female	0.794545
4	97	Male	0.833261
4	98	Female	0.79255
4	98	Male	0.831923
4	99	Female	0.790524
4	99	Male	0.830563
5	18	Female	0.871405
5	18	Male	0.884791
5	19	Female	0.870708
5	19	Male	0.884198
5	20	Female	0.870005
5	20	Male	0.883603
5	21	Female	0.869296
5	21	Male	0.883005
5	22	Female	0.868581
5	22	Male	0.882405
5	23	Female	0.867859
5	23	Male	0.881802
5	24	Female	0.867131
5	24	Male	0.881195
5	25	Female	0.866396
5	25	Male	0.880586
5	26	Female	0.865655
5	26	Male	0.879974
5	27	Female	0.864906
5	27	Male	0.879358
5	28	Female	0.86415
5	28	Male	0.878739
5	29	Female	0.863386
5	29	Male	0.878116
5	30	Female	0.862614
5	30	Male	0.87749
5	31	Female	0.861835
5	31	Male	0.87686
5	32	Female	0.861046
5	32	Male	0.876227
5	33	Female	0.86025
5	33	Male	0.875589
5	34	Female	0.859444
5	34	Male	0.874947
5	35	Female	0.858629
5	35	Male	0.874301
5	36	Female	0.857805
5	36	Male	0.87365
5	37	Female	0.856971
5	37	Male	0.872995
5	38	Female	0.856127
5	38	Male	0.872336
5	39	Female	0.855273
5	39	Male	0.871671
5	40	Female	0.854409
5	40	Male	0.871001
5	41	Female	0.853534
5	41	Male	0.870326
5	42	Female	0.852647
5	42	Male	0.869646
5	43	Female	0.851749
5	43	Male	0.86896
5	44	Female	0.85084
5	44	Male	0.868268
5	45	Female	0.849918
5	45	Male	0.86757
5	46	Female	0.848984
5	46	Male	0.866866
5	47	Female	0.848037
5	47	Male	0.866156
5	48	Female	0.847078
5	48	Male	0.86544
5	49	Female	0.846104
5	49	Male	0.864716
5	50	Female	0.845118
5	50	Male	0.863986
5	51	Female	0.844117
5	51	Male	0.863248
5	52	Female	0.843102
5	52	Male	0.862503
5	53	Female	0.842072
5	53	Male	0.86175
5	54	Female	0.841027
5	54	Male	0.86099
5	55	Female	0.839967
5	55	Male	0.860221
5	56	Female	0.838891
5	56	Male	0.859444
5	57	Female	0.837798
5	57	Male	0.858658
5	58	Female	0.836689
5	58	Male	0.857863
5	59	Female	0.835564
5	59	Male	0.85706
5	60	Female	0.83442
5	60	Male	0.856247
5	61	Female	0.83326
5	61	Male	0.855424
5	62	Female	0.832081
5	62	Male	0.854591
5	63	Female	0.830884
5	63	Male	0.853748
5	64	Female	0.829667
5	64	Male	0.852894
5	65	Female	0.828432
5	65	Male	0.85203
5	66	Female	0.827177
5	66	Male	0.851155
5	67	Female	0.825902
5	67	Male	0.850268
5	68	Female	0.824607
5	68	Male	0.849369
5	69	Female	0.82329
5	69	Male	0.848458
5	70	Female	0.821953
5	70	Male	0.847535
5	71	Female	0.820594
5	71	Male	0.846599
5	72	Female	0.819212
5	72	Male	0.84565
5	73	Female	0.817809
5	73	Male	0.844688
5	74	Female	0.816382
5	74	Male	0.843712
5	75	Female	0.814932
5	75	Male	0.842722
5	76	Female	0.813459
5	76	Male	0.841717
5	77	Female	0.811961
5	77	Male	0.840698
5	78	Female	0.810439
5	78	Male	0.839663
5	79	Female	0.808892
5	79	Male	0.838613
5	80	Female	0.80732
5	80	Male	0.837547
5	81	Female	0.805721
5	81	Male	0.836465
5	82	Female	0.804097
5	82	Male	0.835366
5	83	Female	0.802446
5	83	Male	0.83425
5	84	Female	0.800769
5	84	Male	0.833116
5	85	Female	0.799063
5	85	Male	0.831965
5	86	Female	0.797331
5	86	Male	0.830795
5	87	Female	0.79557
5	87	Male	0.829607
5	88	Female	0.79378
5	88	Male	0.8284
5	89	Female	0.791962
5	89	Male	0.827173
5	90	Female	0.790114
5	90	Male	0.825926
5	91	Female	0.788237
5	91	Male	0.824659
5	92	Female	0.786329
5	92	Male	0.823372
5	93	Female	0.784391
5	93	Male	0.822063
5	94	Female	0.782423
5	94	Male	0.820732
5	95	Female	0.780423
5	95	Male	0.81938
5	96	Female	0.778392
5	96	Male	0.818005
5	97	Female	0.776329
5	97	Male	0.816607
5	98	Female	0.774234
5	98	Male	0.815186
5	99	Female	0.772107
5	99	Male	0.813741
6	18	Female	0.857433
6	18	Male	0.870792
6	19	Female	0.856736
6	19	Male	0.8702
6	20	Female	0.856032
6	20	Male	0.869606
6	21	Female	0.855322
6	21	Male	0.86901
6	22	Female	0.854604
6	22	Male	0.86841
6	23	Female	0.85388
6	23	Male	0.867807
6	24	Female	0.853148
6	24	Male	0.867201
6	25	Female	0.852409
6	25	Male	0.866592
6	26	Female	0.851662
6	26	Male	0.86598
6	27	Female	0.850907
6	27	Male	0.865364
6	28	Female	0.850144
6	28	Male	0.864744
6	29	Female	0.849372
6	29	Male	0.864121
6	30	Female	0.848591
6	30	Male	0.863493
6	31	Female	0.847801
6	31	Male	0.862861
6	32	Female	0.847002
6	32	Male	0.862226
6	33	Female	0.846193
6	33	Male	0.861585
6	34	Female	0.845374
6	34	Male	0.86094
6	35	Female	0.844545
6	35	Male	0.860291
6	36	Female	0.843706
6	36	Male	0.859636
6	37	Female	0.842855
6	37	Male	0.858976
6	38	Female	0.841994
6	38	Male	0.858311
6	39	Female	0.841121
6	39	Male	0.857641
6	40	Female	0.840236
6	40	Male	0.856965
6	41	Female	0.839339
6	41	Male	0.856283
6	42	Female	0.83843
6	42	Male	0.855595
6	43	Female	0.837509
6	43	Male	0.8549
6	44	Female	0.836574
6	44	Male	0.854199
6	45	Female	0.835626
6	45	Male	0.853492
6	46	Female	0.834664
6	46	Male	0.852777
6	47	Female	0.833688
6	47	Male	0.852056
6	48	Female	0.832698
6	48	Male	0.851327
6	49	Female	0.831693
6	49	Male	0.85059
6	50	Female	0.830673
6	50	Male	0.849846
6	51	Female	0.829637
6	51	Male	0.849093
6	52	Female	0.828586
6	52	Male	0.848332
6	53	Female	0.827518
6	53	Male	0.847562
6	54	Female	0.826434
6	54	Male	0.846784
6	55	Female	0.825333
6	55	Male	0.845996
6	56	Female	0.824215
6	56	Male	0.845199
6	57	Female	0.823079
6	57	Male	0.844392
6	58	Female	0.821925
6	58	Male	0.843576
6	59	Female	0.820752
6	59	Male	0.842749
6	60	Female	0.819561
6	60	Male	0.841911
6	61	Female	0.81835
6	61	Male	0.841062
6	62	Female	0.81712
6	62	Male	0.840203
6	63	Female	0.81587
6	63	Male	0.839332
6	64	Female	0.8146
6	64	Male	0.838449
6	65	Female	0.813308
6	65	Male	0.837554
6	66	Female	0.811996
6	66	Male	0.836646
6	67	Female	0.810662
6	67	Male	0.835726
6	68	Female	0.809306
6	68	Male	0.834792
6	69	Female	0.807928
6	69	Male	0.833845
6	70	Female	0.806527
6	70	Male	0.832885
6	71	Female	0.805102
6	71	Male	0.83191
6	72	Female	0.803654
6	72	Male	0.830921
6	73	Female	0.802182
6	73	Male	0.829916
6	74	Female	0.800686
6	74	Male	0.828897
6	75	Female	0.799165
6	75	Male	0.827862
6	76	Female	0.797619
6	76	Male	0.826811
6	77	Female	0.796047
6	77	Male	0.825744
6	78	Female	0.79445
6	78	Male	0.824659
6	79	Female	0.792826
6	79	Male	0.823558
6	80	Female	0.791175
6	80	Male	0.82244
6	81	Female	0.789497
6	81	Male	0.821303
6	82	Female	0.787792
6	82	Male	0.820148
6	83	Female	0.786059
6	83	Male	0.818975
6	84	Female	0.784297
6	84	Male	0.817782
6	85	Female	0.782507
6	85	Male	0.81657
6	86	Female	0.780688
6	86	Male	0.815338
6	87	Female	0.77884
6	87	Male	0.814085
6	88	Female	0.776961
6	88	Male	0.812812
6	89	Female	0.775053
6	89	Male	0.811518
6	90	Female	0.773115
6	90	Male	0.810202
6	91	Female	0.771145
6	91	Male	0.808864
6	92	Female	0.769145
6	92	Male	0.807504
6	93	Female	0.767113
6	93	Male	0.806121
6	94	Female	0.76505
6	94	Male	0.804714
6	95	Female	0.762954
6	95	Male	0.803284
6	96	Female	0.760827
6	96	Male	0.80183
6	97	Female	0.758666
6	97	Male	0.800351
6	98	Female	0.756473
6	98	Male	0.798848
6	99	Female	0.754247
6	99	Male	0.797319
7	18	Female	0.844053
7	18	Male	0.857111
7	19	Female	0.843358
7	19	Male	0.856528
7	20	Female	0.842657
7	20	Male	0.855943
7	21	Female	0.841948
7	21	Male	0.855354
7	22	Female	0.841231
7	22	Male	0.854762
7	23	Female	0.840506
7	23	Male	0.854167
7	24	Female	0.839773
7	24	Male	0.853568
7	25	Female	0.839031
7	25	Male	0.852966
7	26	Female	0.83828
7	26	Male	0.852359
7	27	Female	0.837521
7	27	Male	0.851749
7	28	Female	0.836751
7	28	Male	0.851135
7	29	Female	0.835972
7	29	Male	0.850516
7	30	Female	0.835184
7	30	Male	0.849893
7	31	Female	0.834384
7	31	Male	0.849265
7	32	Female	0.833575
7	32	Male	0.848632
7	33	Female	0.832754
7	33	Male	0.847994
7	34	Female	0.831922
7	34	Male	0.847352
7	35	Female	0.831079
7	35	Male	0.846703
7	36	Female	0.830224
7	36	Male	0.846049
7	37	Female	0.829357
7	37	Male	0.845389
7	38	Female	0.828477
7	38	Male	0.844723
7	39	Female	0.827585
7	39	Male	0.844051
7	40	Female	0.826679
7	40	Male	0.843373
7	41	Female	0.825761
7	41	Male	0.842688
7	42	Female	0.824828
7	42	Male	0.841995
7	43	Female	0.823881
7	43	Male	0.841296
7	44	Female	0.82292
7	44	Male	0.840589
7	45	Female	0.821944
7	45	Male	0.839875
7	46	Female	0.820953
7	46	Male	0.839153
7	47	Female	0.819946
7	47	Male	0.838423
7	48	Female	0.818924
7	48	Male	0.837684
7	49	Female	0.817885
7	49	Male	0.836936
7	50	Female	0.81683
7	50	Male	0.83618
7	51	Female	0.815757
7	51	Male	0.835415
7	52	Female	0.814668
7	52	Male	0.83464
7	53	Female	0.81356
7	53	Male	0.833855
7	54	Female	0.812435
7	54	Male	0.83306
7	55	Female	0.811291
7	55	Male	0.832255
7	56	Female	0.810128
7	56	Male	0.831439
7	57	Female	0.808946
7	57	Male	0.830613
7	58	Female	0.807745
7	58	Male	0.829775
7	59	Female	0.806523
7	59	Male	0.828925
7	60	Female	0.805281
7	60	Male	0.828064
7	61	Female	0.804018
7	61	Male	0.82719
7	62	Female	0.802734
7	62	Male	0.826304
7	63	Female	0.801429
7	63	Male	0.825405
7	64	Female	0.800102
7	64	Male	0.824493
7	65	Female	0.798752
7	65	Male	0.823567
7	66	Female	0.79738
7	66	Male	0.822627
7	67	Female	0.795984
7	67	Male	0.821674
7	68	Female	0.794565
7	68	Male	0.820705
7	69	Female	0.793122
7	69	Male	0.819722
7	70	Female	0.791655
7	70	Male	0.818723
7	71	Female	0.790163
7	71	Male	0.817709
7	72	Female	0.788647
7	72	Male	0.816678
7	73	Female	0.787104
7	73	Male	0.815631
7	74	Female	0.785536
7	74	Male	0.814568
7	75	Female	0.783942
7	75	Male	0.813487
7	76	Female	0.782321
7	76	Male	0.812388
7	77	Female	0.780674
7	77	Male	0.811272
7	78	Female	0.778999
7	78	Male	0.810137
7	79	Female	0.777296
7	79	Male	0.808984
7	80	Female	0.775565
7	80	Male	0.807811
7	81	Female	0.773806
7	81	Male	0.806619
7	82	Female	0.772018
7	82	Male	0.805407
7	83	Female	0.770201
7	83	Male	0.804175
7	84	Female	0.768355
7	84	Male	0.802922
7	85	Female	0.766479
7	85	Male	0.801648
7	86	Female	0.764573
7	86	Male	0.800352
7	87	Female	0.762636
7	87	Male	0.799034
7	88	Female	0.760669
7	88	Male	0.797694
7	89	Female	0.758671
7	89	Male	0.796331
7	90	Female	0.756641
7	90	Male	0.794945
7	91	Female	0.75458
7	91	Male	0.793535
7	92	Female	0.752486
7	92	Male	0.792101
7	93	Female	0.750361
7	93	Male	0.790642
7	94	Female	0.748203
7	94	Male	0.789159
7	95	Female	0.746012
7	95	Male	0.787651
7	96	Female	0.743788
7	96	Male	0.786117
7	97	Female	0.741531
7	97	Male	0.784556
7	98	Female	0.739241
7	98	Male	0.782969
7	99	Female	0.736917
7	99	Male	0.781356
8	18	Female	0.831361
8	18	Male	0.843921
8	19	Female	0.83067
8	19	Male	0.843352
8	20	Female	0.82997
8	20	Male	0.84278
8	21	Female	0.829262
8	21	Male	0.842205
8	22	Female	0.828545
8	22	Male	0.841626
8	23	Female	0.827818
8	23	Male	0.841043
8	24	Female	0.827082
8	24	Male	0.840456
8	25	Female	0.826337
8	25	Male	0.839864
8	26	Female	0.825581
8	26	Male	0.839269
8	27	Female	0.824815
8	27	Male	0.838668
8	28	Female	0.824038
8	28	Male	0.838063
8	29	Female	0.82325
8	29	Male	0.837453
8	30	Female	0.822451
8	30	Male	0.836837
8	31	Female	0.82164
8	31	Male	0.836216
8	32	Female	0.820818
8	32	Male	0.83559
8	33	Female	0.819983
8	33	Male	0.834958
8	34	Female	0.819135
8	34	Male	0.834319
8	35	Female	0.818275
8	35	Male	0.833675
8	36	Female	0.817402
8	36	Male	0.833024
8	37	Female	0.816515
8	37	Male	0.832366
8	38	Female	0.815614
8	38	Male	0.831701
8	39	Female	0.814699
8	39	Male	0.831029
8	40	Female	0.813769
8	40	Male	0.83035
8	41	Female	0.812824
8	41	Male	0.829663
8	42	Female	0.811865
8	42	Male	0.828968
8	43	Female	0.810889
8	43	Male	0.828264
8	44	Female	0.809898
8	44	Male	0.827553
8	45	Female	0.80889
8	45	Male	0.826832
8	46	Female	0.807866
8	46	Male	0.826103
8	47	Female	0.806824
8	47	Male	0.825364
8	48	Female	0.805765
8	48	Male	0.824616
8	49	Female	0.804689
8	49	Male	0.823858
8	50	Female	0.803594
8	50	Male	0.82309
8	51	Female	0.802481
8	51	Male	0.822311
8	52	Female	0.801348
8	52	Male	0.821521
8	53	Female	0.800197
8	53	Male	0.820721
8	54	Female	0.799026
8	54	Male	0.819909
8	55	Female	0.797835
8	55	Male	0.819086
8	56	Female	0.796623
8	56	Male	0.81825
8	57	Female	0.795391
8	57	Male	0.817402
8	58	Female	0.794137
8	58	Male	0.816542
8	59	Female	0.792862
8	59	Male	0.815668
8	60	Female	0.791565
8	60	Male	0.814781
8	61	Female	0.790246
8	61	Male	0.813881
8	62	Female	0.788904
8	62	Male	0.812967
8	63	Female	0.787539
8	63	Male	0.812038
8	64	Female	0.786151
8	64	Male	0.811094
8	65	Female	0.784739
8	65	Male	0.810136
8	66	Female	0.783302
8	66	Male	0.809162
8	67	Female	0.781841
8	67	Male	0.808172
8	68	Female	0.780355
8	68	Male	0.807166
8	69	Female	0.778844
8	69	Male	0.806144
8	70	Female	0.777307
8	70	Male	0.805104
8	71	Female	0.775744
8	71	Male	0.804048
8	72	Female	0.774155
8	72	Male	0.802974
8	73	Female	0.772538
8	73	Male	0.801881
8	74	Female	0.770895
8	74	Male	0.800771
8	75	Female	0.769224
8	75	Male	0.799641
8	76	Female	0.767525
8	76	Male	0.798493
8	77	Female	0.765799
8	77	Male	0.797324
8	78	Female	0.764043
8	78	Male	0.796136
8	79	Female	0.762259
8	79	Male	0.794927
8	80	Female	0.760445
8	80	Male	0.793698
8	81	Female	0.758602
8	81	Male	0.792447
8	82	Female	0.75673
8	82	Male	0.791175
8	83	Female	0.754827
8	83	Male	0.789881
8	84	Female	0.752893
8	84	Male	0.788565
8	85	Female	0.750929
8	85	Male	0.787225
8	86	Female	0.748934
8	86	Male	0.785863
8	87	Female	0.746907
8	87	Male	0.784477
8	88	Female	0.744849
8	88	Male	0.783067
8	89	Female	0.742759
8	89	Male	0.781632
8	90	Female	0.740637
8	90	Male	0.780173
8	91	Female	0.738483
8	91	Male	0.778689
8	92	Female	0.736295
8	92	Male	0.777179
8	93	Female	0.734075
8	93	Male	0.775643
8	94	Female	0.731822
8	94	Male	0.77408
8	95	Female	0.729536
8	95	Male	0.772491
8	96	Female	0.727216
8	96	Male	0.770874
8	97	Female	0.724862
8	97	Male	0.76923
8	98	Female	0.722475
8	98	Male	0.767558
8	99	Female	0.720054
8	99	Male	0.765858
9	18	Female	0.81939
9	18	Male	0.831353
9	19	Female	0.818699
9	19	Male	0.830802
9	20	Female	0.817998
9	20	Male	0.830247
9	21	Female	0.817287
9	21	Male	0.829687
9	22	Female	0.816566
9	22	Male	0.829123
9	23	Female	0.815835
9	23	Male	0.828554
9	24	Female	0.815092
9	24	Male	0.827981
9	25	Female	0.814338
9	25	Male	0.827402
9	26	Female	0.813573
9	26	Male	0.826818
9	27	Female	0.812796
9	27	Male	0.826229
9	28	Female	0.812007
9	28	Male	0.825634
9	29	Female	0.811206
9	29	Male	0.825033
9	30	Female	0.810392
9	30	Male	0.824427
9	31	Female	0.809565
9	31	Male	0.823813
9	32	Female	0.808725
9	32	Male	0.823193
9	33	Female	0.807871
9	33	Male	0.822567
9	34	Female	0.807002
9	34	Male	0.821933
9	35	Female	0.80612
9	35	Male	0.821292
9	36	Female	0.805223
9	36	Male	0.820644
9	37	Female	0.80431
9	37	Male	0.819987
9	38	Female	0.803383
9	38	Male	0.819323
9	39	Female	0.802439
9	39	Male	0.81865
9	40	Female	0.80148
9	40	Male	0.817969
9	41	Female	0.800504
9	41	Male	0.817279
9	42	Female	0.799511
9	42	Male	0.816579
9	43	Female	0.798502
9	43	Male	0.815871
9	44	Female	0.797474
9	44	Male	0.815152
9	45	Female	0.796429
9	45	Male	0.814424
9	46	Female	0.795366
9	46	Male	0.813685
9	47	Female	0.794284
9	47	Male	0.812936
9	48	Female	0.793183
9	48	Male	0.812176
9	49	Female	0.792062
9	49	Male	0.811404
9	50	Female	0.790922
9	50	Male	0.810621
9	51	Female	0.789762
9	51	Male	0.809827
9	52	Female	0.788582
9	52	Male	0.80902
9	53	Female	0.78738
9	53	Male	0.8082
9	54	Female	0.786158
9	54	Male	0.807368
9	55	Female	0.784914
9	55	Male	0.806523
9	56	Female	0.783647
9	56	Male	0.805664
9	57	Female	0.782359
9	57	Male	0.804792
9	58	Female	0.781048
9	58	Male	0.803905
9	59	Female	0.779714
9	59	Male	0.803004
9	60	Female	0.778357
9	60	Male	0.802088
9	61	Female	0.776975
9	61	Male	0.801156
9	62	Female	0.77557
9	62	Male	0.80021
9	63	Female	0.77414
9	63	Male	0.799247
9	64	Female	0.772685
9	64	Male	0.798268
9	65	Female	0.771205
9	65	Male	0.797272
9	66	Female	0.7697
9	66	Male	0.79626
9	67	Female	0.768168
9	67	Male	0.79523
9	68	Female	0.76661
9	68	Male	0.794182
9	69	Female	0.765026
9	69	Male	0.793116
9	70	Female	0.763414
9	70	Male	0.792032
9	71	Female	0.761776
9	71	Male	0.790928
9	72	Female	0.760109
9	72	Male	0.789806
9	73	Female	0.758414
9	73	Male	0.788664
9	74	Female	0.756692
9	74	Male	0.787501
9	75	Female	0.75494
9	75	Male	0.786319
9	76	Female	0.753159
9	76	Male	0.785115
9	77	Female	0.75135
9	77	Male	0.78389
9	78	Female	0.74951
9	78	Male	0.782644
9	79	Female	0.747641
9	79	Male	0.781376
9	80	Female	0.745741
9	80	Male	0.780085
9	81	Female	0.743811
9	81	Male	0.778771
9	82	Female	0.74185
9	82	Male	0.777434
9	83	Female	0.739858
9	83	Male	0.776074
9	84	Female	0.737835
9	84	Male	0.77469
9	85	Female	0.73578
9	85	Male	0.773281
9	86	Female	0.733693
9	86	Male	0.771848
9	87	Female	0.731575
9	87	Male	0.770389
9	88	Female	0.729424
9	88	Male	0.768905
9	89	Female	0.72724
9	89	Male	0.767395
9	90	Female	0.725024
9	90	Male	0.765859
9	91	Female	0.722774
9	91	Male	0.764296
9	92	Female	0.720492
9	92	Male	0.762706
9	93	Female	0.718176
9	93	Male	0.761088
9	94	Female	0.715827
9	94	Male	0.759443
9	95	Female	0.713444
9	95	Male	0.757769
9	96	Female	0.711028
9	96	Male	0.756067
9	97	Female	0.708577
9	97	Male	0.754336
9	98	Female	0.706093
9	98	Male	0.752575
9	99	Female	0.703574
9	99	Male	0.750785
10	18	Female	0.808119
10	18	Male	0.81949
10	19	Female	0.807421
10	19	Male	0.818956
10	20	Female	0.806713
10	20	Male	0.818417
10	21	Female	0.805994
10	21	Male	0.817873
10	22	Female	0.805263
10	22	Male	0.817324
10	23	Female	0.80452
10	23	Male	0.816769
10	24	Female	0.803764
10	24	Male	0.816208
10	25	Female	0.802996
10	25	Male	0.815641
10	26	Female	0.802216
10	26	Male	0.815068
10	27	Female	0.801422
10	27	Male	0.814488
10	28	Female	0.800614
10	28	Male	0.813902
10	29	Female	0.799793
10	29	Male	0.813309
10	30	Female	0.798957
10	30	Male	0.812708
10	31	Female	0.798107
10	31	Male	0.8121
10	32	Female	0.797242
10	32	Male	0.811485
10	33	Female	0.796362
10	33	Male	0.810861
10	34	Female	0.795466
10	34	Male	0.810229
10	35	Female	0.794554
10	35	Male	0.809589
10	36	Female	0.793627
10	36	Male	0.80894
10	37	Female	0.792682
10	37	Male	0.808282
10	38	Female	0.791721
10	38	Male	0.807614
10	39	Female	0.790742
10	39	Male	0.806937
10	40	Female	0.789746
10	40	Male	0.80625
10	41	Female	0.788732
10	41	Male	0.805553
10	42	Female	0.7877
10	42	Male	0.804846
10	43	Female	0.786649
10	43	Male	0.804127
10	44	Female	0.785578
10	44	Male	0.803398
10	45	Female	0.784489
10	45	Male	0.802657
10	46	Female	0.783379
10	46	Male	0.801904
10	47	Female	0.78225
10	47	Male	0.80114
10	48	Female	0.7811
10	48	Male	0.800363
10	49	Female	0.779929
10	49	Male	0.799573
10	50	Female	0.778737
10	50	Male	0.798771
10	51	Female	0.777523
10	51	Male	0.797955
10	52	Female	0.776288
10	52	Male	0.797125
10	53	Female	0.77503
10	53	Male	0.796282
10	54	Female	0.773749
10	54	Male	0.795424
10	55	Female	0.772446
10	55	Male	0.794551
10	56	Female	0.771119
10	56	Male	0.793664
10	57	Female	0.769768
10	57	Male	0.792761
10	58	Female	0.768393
10	58	Male	0.791843
10	59	Female	0.766994
10	59	Male	0.790908
10	60	Female	0.76557
10	60	Male	0.789957
10	61	Female	0.764121
10	61	Male	0.788989
10	62	Female	0.762646
10	62	Male	0.788004
10	63	Female	0.761145
10	63	Male	0.787002
10	64	Female	0.759619
10	64	Male	0.785981
10	65	Female	0.758065
10	65	Male	0.784943
10	66	Female	0.756485
10	66	Male	0.783885
10	67	Female	0.754878
10	67	Male	0.782809
10	68	Female	0.753243
10	68	Male	0.781713
10	69	Female	0.75158
10	69	Male	0.780598
10	70	Female	0.749889
10	70	Male	0.779462
10	71	Female	0.74817
10	71	Male	0.778306
10	72	Female	0.746421
10	72	Male	0.777129
10	73	Female	0.744644
10	73	Male	0.775931
10	74	Female	0.742837
10	74	Male	0.774711
10	75	Female	0.741001
10	75	Male	0.773469
10	76	Female	0.739134
10	76	Male	0.772205
10	77	Female	0.737237
10	77	Male	0.770917
10	78	Female	0.73531
10	78	Male	0.769607
10	79	Female	0.733352
10	79	Male	0.768273
10	80	Female	0.731363
10	80	Male	0.766915
10	81	Female	0.729342
10	81	Male	0.765532
10	82	Female	0.72729
10	82	Male	0.764125
10	83	Female	0.725206
10	83	Male	0.762693
10	84	Female	0.723091
10	84	Male	0.761235
10	85	Female	0.720943
10	85	Male	0.759751
10	86	Female	0.718762
10	86	Male	0.758241
10	87	Female	0.716549
10	87	Male	0.756705
10	88	Female	0.714303
10	88	Male	0.755141
10	89	Female	0.712025
10	89	Male	0.75355
10	90	Female	0.709713
10	90	Male	0.751931
10	91	Female	0.707367
10	91	Male	0.750285
10	92	Female	0.704989
10	92	Male	0.748609
10	93	Female	0.702576
10	93	Male	0.746905
10	94	Female	0.700131
10	94	Male	0.745171
10	95	Female	0.697651
10	95	Male	0.743409
10	96	Female	0.695137
10	96	Male	0.741616
10	97	Female	0.69259
10	97	Male	0.739793
10	98	Female	0.690008
10	98	Male	0.737939
10	99	Female	0.687393
10	99	Male	0.736054
11	18	Female	0.797479
11	18	Male	0.808361
11	19	Female	0.796768
11	19	Male	0.807842
11	20	Female	0.796045
11	20	Male	0.807316
11	21	Female	0.79531
11	21	Male	0.806784
11	22	Female	0.794561
11	22	Male	0.806246
11	23	Female	0.793799
11	23	Male	0.805701
11	24	Female	0.793023
11	24	Male	0.805149
11	25	Female	0.792234
11	25	Male	0.80459
11	26	Female	0.791429
11	26	Male	0.804023
11	27	Female	0.790611
11	27	Male	0.803449
11	28	Female	0.789777
11	28	Male	0.802867
11	29	Female	0.788927
11	29	Male	0.802276
11	30	Female	0.788062
11	30	Male	0.801678
11	31	Female	0.787182
11	31	Male	0.80107
11	32	Female	0.786284
11	32	Male	0.800454
11	33	Female	0.78537
11	33	Male	0.799828
11	34	Female	0.784439
11	34	Male	0.799193
11	35	Female	0.783491
11	35	Male	0.798548
11	36	Female	0.782525
11	36	Male	0.797893
11	37	Female	0.781541
11	37	Male	0.797227
11	38	Female	0.780538
11	38	Male	0.796551
11	39	Female	0.779517
11	39	Male	0.795863
11	40	Female	0.778476
11	40	Male	0.795165
11	41	Female	0.777416
11	41	Male	0.794454
11	42	Female	0.776336
11	42	Male	0.793732
11	43	Female	0.775236
11	43	Male	0.792998
11	44	Female	0.774116
11	44	Male	0.792251
11	45	Female	0.772974
11	45	Male	0.791491
11	46	Female	0.771812
11	46	Male	0.790718
11	47	Female	0.770628
11	47	Male	0.789932
11	48	Female	0.769421
11	48	Male	0.789131
11	49	Female	0.768193
11	49	Male	0.788317
11	50	Female	0.766942
11	50	Male	0.787488
11	51	Female	0.765668
11	51	Male	0.786644
11	52	Female	0.76437
11	52	Male	0.785785
11	53	Female	0.763049
11	53	Male	0.78491
11	54	Female	0.761704
11	54	Male	0.78402
11	55	Female	0.760334
11	55	Male	0.783113
11	56	Female	0.75894
11	56	Male	0.782189
11	57	Female	0.75752
11	57	Male	0.781249
11	58	Female	0.756075
11	58	Male	0.780292
11	59	Female	0.754605
11	59	Male	0.779316
11	60	Female	0.753108
11	60	Male	0.778323
11	61	Female	0.751585
11	61	Male	0.777311
11	62	Female	0.750035
11	62	Male	0.77628
11	63	Female	0.748458
11	63	Male	0.775231
11	64	Female	0.746854
11	64	Male	0.774162
11	65	Female	0.745222
11	65	Male	0.773073
11	66	Female	0.743562
11	66	Male	0.771963
11	67	Female	0.741873
11	67	Male	0.770833
11	68	Female	0.740156
11	68	Male	0.769682
11	69	Female	0.738411
11	69	Male	0.76851
11	70	Female	0.736635
11	70	Male	0.767316
11	71	Female	0.734831
11	71	Male	0.766099
11	72	Female	0.732997
11	72	Male	0.764861
11	73	Female	0.731132
11	73	Male	0.763599
11	74	Female	0.729237
11	74	Male	0.762314
11	75	Female	0.727312
11	75	Male	0.761005
11	76	Female	0.725356
11	76	Male	0.759672
11	77	Female	0.723369
11	77	Male	0.758315
11	78	Female	0.721351
11	78	Male	0.756933
11	79	Female	0.719301
11	79	Male	0.755526
11	80	Female	0.717219
11	80	Male	0.754094
11	81	Female	0.715106
11	81	Male	0.752635
11	82	Female	0.71296
11	82	Male	0.75115
11	83	Female	0.710782
11	83	Male	0.749638
11	84	Female	0.708572
11	84	Male	0.7481
11	85	Female	0.706329
11	85	Male	0.746534
11	86	Female	0.704053
11	86	Male	0.74494
11	87	Female	0.701745
11	87	Male	0.743318
11	88	Female	0.699403
11	88	Male	0.741667
11	89	Female	0.697028
11	89	Male	0.739988
11	90	Female	0.69462
11	90	Male	0.738279
11	91	Female	0.692178
11	91	Male	0.736541
11	92	Female	0.689703
11	92	Male	0.734773
11	93	Female	0.687195
11	93	Male	0.732974
11	94	Female	0.684653
11	94	Male	0.731145
11	95	Female	0.682077
11	95	Male	0.729285
11	96	Female	0.679467
11	96	Male	0.727394
11	97	Female	0.676824
11	97	Male	0.725471
11	98	Female	0.674148
11	98	Male	0.723517
11	99	Female	0.671437
11	99	Male	0.72153
12	18	Female	0.787376
12	18	Male	0.797943
12	19	Female	0.786644
12	19	Male	0.797432
12	20	Female	0.785899
12	20	Male	0.796914
12	21	Female	0.785139
12	21	Male	0.796388
12	22	Female	0.784364
12	22	Male	0.795855
12	23	Female	0.783575
12	23	Male	0.795314
12	24	Female	0.78277
12	24	Male	0.794765
12	25	Female	0.78195
12	25	Male	0.794207
12	26	Female	0.781115
12	26	Male	0.793641
12	27	Female	0.780263
12	27	Male	0.793066
12	28	Female	0.779394
12	28	Male	0.792481
12	29	Female	0.778509
12	29	Male	0.791887
12	30	Female	0.777607
12	30	Male	0.791283
12	31	Female	0.776687
12	31	Male	0.790669
12	32	Female	0.775749
12	32	Male	0.790045
12	33	Female	0.774793
[truncated: 99,025 more rows]

## Sheet: PG-R
PHQ9	GAD7	PG-R9
0	0	0.950878
0	1	0.942737
0	2	0.93489
0	3	0.927613
0	4	0.921057
0	5	0.915255
0	6	0.910147
0	7	0.90562
0	8	0.901544
0	9	0.897792
0	10	0.894256
0	11	0.890846
0	12	0.887493
0	13	0.884145
0	14	0.880761
0	15	0.877312
0	16	0.873778
0	17	0.870142
0	18	0.866394
0	19	0.862524
0	20	0.858526
0	21	0.854397
1	0	0.943408
1	1	0.935009
1	2	0.927019
1	3	0.919676
1	4	0.913101
1	5	0.907298
1	6	0.902189
1	7	0.897653
1	8	0.893556
1	9	0.889772
1	10	0.886194
1	11	0.882735
1	12	0.879328
1	13	0.875922
1	14	0.872479
1	15	0.868971
1	16	0.865378
1	17	0.861684
1	18	0.857878
1	19	0.853952
1	20	0.849901
1	21	0.845721
2	0	0.935251
2	1	0.926783
2	2	0.918791
2	3	0.911482
2	4	0.904948
2	5	0.899178
2	6	0.894085
2	7	0.889547
2	8	0.88543
2	9	0.881613
2	10	0.877991
2	11	0.87448
2	12	0.871016
2	13	0.86755
2	14	0.864045
2	15	0.860475
2	16	0.856819
2	17	0.853064
2	18	0.849198
2	19	0.845215
2	20	0.841108
2	21	0.836873
3	0	0.926688
3	1	0.918277
3	2	0.910368
3	3	0.903143
3	4	0.896678
3	5	0.890953
3	6	0.885881
3	7	0.88134
3	8	0.877202
3	9	0.873349
3	10	0.86968
3	11	0.866115
3	12	0.862592
3	13	0.859063
3	14	0.855495
3	15	0.85186
3	16	0.84814
3	17	0.844321
3	18	0.840394
3	19	0.83635
3	20	0.832185
3	21	0.827894
4	0	0.917922
4	1	0.909634
4	2	0.901846
4	3	0.894723
4	4	0.888335
4	5	0.882657
4	6	0.877604
4	7	0.873059
4	8	0.868898
4	9	0.865007
4	10	0.86129
4	11	0.857669
4	12	0.854085
4	13	0.850492
4	14	0.846858
4	15	0.843157
4	16	0.839371
4	17	0.835488
4	18	0.831496
4	19	0.82739
4	20	0.823165
4	21	0.818816
5	0	0.909068
5	1	0.900926
5	2	0.89327
5	3	0.886255
5	4	0.879943
5	5	0.874311
5	6	0.869276
5	7	0.864725
5	8	0.860539
5	9	0.856609
5	10	0.852842
5	11	0.849164
5	12	0.845517
5	13	0.84186
5	14	0.838159
5	15	0.83439
5	16	0.830537
5	17	0.826588
5	18	0.822531
5	19	0.818362
5	20	0.814075
5	21	0.809667
6	0	0.900175
6	1	0.892186
6	2	0.884664
6	3	0.877755
6	4	0.871518
6	5	0.86593
6	6	0.860911
6	7	0.856353
6	8	0.852141
6	9	0.848171
6	10	0.844353
6	11	0.840617
6	12	0.836908
6	13	0.833184
6	14	0.829416
6	15	0.825579
6	16	0.821658
6	17	0.817641
6	18	0.813519
6	19	0.809285
6	20	0.804936
6	21	0.800467
7	0	0.891263
7	1	0.883427
7	2	0.876037
7	3	0.869232
7	4	0.863069
7	5	0.857524
7	6	0.852521
7	7	0.847955
7	8	0.843717
7	9	0.839705
7	10	0.835836
7	11	0.832042
7	12	0.82827
7	13	0.82448
7	14	0.820643
7	15	0.816737
7	16	0.812748
7	17	0.808663
7	18	0.804474
7	19	0.800175
7	20	0.795763
7	21	0.791233
8	0	0.882339
8	1	0.874655
8	2	0.867396
8	3	0.860695
8	4	0.854605
8	5	0.849102
8	6	0.844114
8	7	0.839539
8	8	0.835274
8	9	0.831221
8	10	0.827301
8	11	0.823448
8	12	0.819612
8	13	0.815755
8	14	0.81185
8	15	0.807875
8	16	0.803817
8	17	0.799664
8	18	0.795408
8	19	0.791044
8	20	0.786567
8	21	0.781976
9	0	0.873407
9	1	0.865874
9	2	0.858746
9	3	0.852148
9	4	0.846129
9	5	0.840669
9	6	0.835694
9	7	0.831111
9	8	0.826819
9	9	0.822725
9	10	0.818753
9	11	0.814841
9	12	0.810941
9	13	0.807018
9	14	0.803044
9	15	0.799
9	16	0.794873
9	17	0.790651
9	18	0.786328
9	19	0.781898
9	20	0.777358
9	21	0.772705
10	0	0.86447
10	1	0.857088
10	2	0.850089
10	3	0.843594
10	4	0.837647
10	5	0.832228
10	6	0.827268
10	7	0.822676
10	8	0.818356
10	9	0.814221
10	10	0.810198
10	11	0.806227
10	12	0.802263
10	13	0.798273
10	14	0.79423
10	15	0.790117
10	16	0.78592
10	17	0.78163
10	18	0.77724
10	19	0.772744
10	20	0.768139
10	21	0.763424
11	0	0.85553
11	1	0.848297
11	2	0.841428
11	3	0.835035
11	4	0.82916
11	5	0.823782
11	6	0.818836
11	7	0.814235
11	8	0.809888
11	9	0.805712
11	10	0.801637
11	11	0.797607
11	12	0.79358
11	13	0.789522
11	14	0.785411
11	15	0.781229
11	16	0.776963
11	17	0.772604
11	18	0.768146
11	19	0.763584
11	20	0.758915
11	21	0.754137
12	0	0.846587
12	1	0.839504
12	2	0.832765
12	3	0.826473
12	4	0.82067
12	5	0.815333
12	6	0.810402
12	7	0.805792
12	8	0.801417
12	9	0.7972
12	10	0.793073
12	11	0.788985
12	12	0.784893
12	13	0.780769
12	14	0.776589
12	15	0.772337
12	16	0.768002
12	17	0.763574
12	18	0.759049
12	19	0.754421
12	20	0.749688
12	21	0.744848
13	0	0.837643
13	1	0.83071
13	2	0.824099
13	3	0.81791
13	4	0.812178
13	5	0.806883
13	6	0.801965
13	7	0.797346
13	8	0.792945
13	9	0.788686
13	10	0.784508
13	11	0.78036
13	12	0.776205
13	13	0.772014
13	14	0.767765
13	15	0.763444
13	16	0.759039
13	17	0.754543
13	18	0.74995
13	19	0.745256
13	20	0.740458
13	21	0.735556
14	0	0.828698
14	1	0.821914
14	2	0.815433
14	3	0.809345
14	4	0.803684
14	5	0.798431
14	6	0.793527
14	7	0.7889
14	8	0.784471
14	9	0.780171
14	10	0.775941
14	11	0.771735
14	12	0.767516
14	13	0.763258
14	14	0.75894
14	15	0.75455
14	16	0.750076
14	17	0.745511
14	18	0.74085
14	19	0.73609
14	20	0.731228
14	21	0.726263
15	0	0.819752
15	1	0.813118
15	2	0.806766
15	3	0.80078
15	4	0.795191
15	5	0.789978
15	6	0.785089
15	7	0.780452
15	8	0.775996
15	9	0.771655
15	10	0.767374
15	11	0.763109
15	12	0.758826
15	13	0.754501
15	14	0.750115
15	15	0.745655
15	16	0.741111
15	17	0.736478
15	18	0.731749
15	19	0.726923
15	20	0.721997
15	21	0.71697
16	0	0.810806
16	1	0.804321
16	2	0.798098
16	3	0.792214
16	4	0.786696
16	5	0.781525
16	6	0.77665
16	7	0.772004
16	8	0.767521
16	9	0.763139
16	10	0.758806
16	11	0.754482
16	12	0.750136
16	13	0.745744
16	14	0.741289
16	15	0.73676
16	16	0.732147
16	17	0.727445
16	18	0.722649
16	19	0.717756
16	20	0.712766
16	21	0.707676
17	0	0.80186
17	1	0.795524
17	2	0.78943
17	3	0.783648
17	4	0.778202
17	5	0.773072
17	6	0.768211
17	7	0.763556
17	8	0.759046
17	9	0.754623
17	10	0.750238
17	11	0.745855
17	12	0.741445
17	13	0.736986
17	14	0.732463
17	15	0.727864
17	16	0.723182
17	17	0.718411
17	18	0.713548
17	19	0.708589
17	20	0.703534
17	21	0.698382
18	0	0.792913
18	1	0.786727
18	2	0.780762
18	3	0.775082
18	4	0.769707
18	5	0.764618
18	6	0.759771
18	7	0.755108
18	8	0.750571
18	9	0.746106
18	10	0.74167
18	11	0.737229
18	12	0.732755
18	13	0.728229
18	14	0.723637
18	15	0.718969
18	16	0.714217
18	17	0.709378
18	18	0.704446
18	19	0.699422
18	20	0.694303
18	21	0.689089
19	0	0.783967
19	1	0.77793
19	2	0.772094
19	3	0.766516
19	4	0.761212
19	5	0.756165
19	6	0.751332
19	7	0.74666
19	8	0.742095
19	9	0.737589
19	10	0.733102
19	11	0.728602
19	12	0.724064
19	13	0.719471
19	14	0.714811
19	15	0.710073
19	16	0.705253
19	17	0.700344
19	18	0.695345
19	19	0.690255
19	20	0.685071
19	21	0.679795
20	0	0.77502
20	1	0.769133
20	2	0.763426
20	3	0.757949
20	4	0.752717
20	5	0.747711
20	6	0.742892
20	7	0.738212
20	8	0.73362
20	9	0.729073
20	10	0.724534
20	11	0.719975
20	12	0.715373
20	13	0.710714
20	14	0.705985
20	15	0.701178
20	16	0.696288
20	17	0.691311
20	18	0.686244
20	19	0.681087
20	20	0.675839
20	21	0.670501
21	0	0.766074
21	1	0.760336
21	2	0.754758
21	3	0.749383
21	4	0.744222
21	5	0.739258
21	6	0.734453
21	7	0.729763
21	8	0.725144
21	9	0.720556
21	10	0.715966
21	11	0.711348
21	12	0.706683
21	13	0.701956
21	14	0.697159
21	15	0.692282
21	16	0.687323
21	17	0.682277
21	18	0.677143
21	19	0.67192
21	20	0.666608
21	21	0.661207
22	0	0.757127
22	1	0.751539
22	2	0.74609
22	3	0.740817
22	4	0.735727
22	5	0.730804
22	6	0.726013
22	7	0.721315
22	8	0.716669
22	9	0.712039
22	10	0.707398
22	11	0.702721
22	12	0.697992
22	13	0.693199
22	14	0.688333
22	15	0.683387
22	16	0.678358
22	17	0.673244
22	18	0.668042
22	19	0.662753
22	20	0.657376
22	21	0.651913
23	0	0.748181
23	1	0.742741
23	2	0.737421
23	3	0.73225
23	4	0.727232
23	5	0.72235
23	6	0.717574
23	7	0.712867
23	8	0.708193
23	9	0.703523
23	10	0.69883
23	11	0.694094
23	12	0.689301
23	13	0.684441
23	14	0.679506
23	15	0.674491
23	16	0.669393
23	17	0.66421
23	18	0.658941
23	19	0.653586
23	20	0.648145
23	21	0.642619
24	0	0.739234
24	1	0.733944
24	2	0.728753
24	3	0.723684
24	4	0.718737
24	5	0.713897
24	6	0.709134
24	7	0.704418
24	8	0.699718
24	9	0.695006
24	10	0.690261
24	11	0.685467
24	12	0.680611
24	13	0.675684
24	14	0.67068
24	15	0.665596
24	16	0.660428
24	17	0.655176
24	18	0.64984
24	19	0.644418
24	20	0.638913
24	21	0.633325
25	0	0.730287
25	1	0.725147
25	2	0.720085
25	3	0.715118
25	4	0.710242
25	5	0.705443
25	6	0.700695
25	7	0.69597
25	8	0.691242
25	9	0.686489
25	10	0.681693
25	11	0.67684
25	12	0.67192
25	13	0.666926
25	14	0.661854
25	15	0.6567
25	16	0.651463
25	17	0.646143
25	18	0.640739
25	19	0.635251
25	20	0.629681
25	21	0.624031
26	0	0.721341
26	1	0.71635
26	2	0.711417
26	3	0.706551
26	4	0.701747
26	5	0.696989
26	6	0.692255
26	7	0.687522
26	8	0.682767
26	9	0.677973
26	10	0.673125
26	11	0.668213
26	12	0.663229
26	13	0.658169
26	14	0.653028
26	15	0.647805
26	16	0.642499
26	17	0.637109
26	18	0.631637
26	19	0.626084
26	20	0.62045
26	21	0.614737
27	0	0.712394
27	1	0.707552
27	2	0.702749
27	3	0.697985
27	4	0.693252
27	5	0.688536
27	6	0.683816
27	7	0.679073
27	8	0.674291
27	9	0.669456
27	10	0.664557
27	11	0.659586
27	12	0.654539
27	13	0.649411
27	14	0.644202
27	15	0.638909
27	16	0.633534
27	17	0.628076
27	18	0.622536
27	19	0.616917
27	20	0.611218
27	21	0.605443

## Sheet: V
PHQ9	GAD7	age	sex	V3
0	0	18	Female	0.939512
0	0	18	Male	0.944497
0	0	19	Female	0.939219
0	0	19	Male	0.944302
0	0	20	Female	0.938916
0	0	20	Male	0.9441
0	0	21	Female	0.938603
0	0	21	Male	0.943891
0	0	22	Female	0.938281
0	0	22	Male	0.943675
0	0	23	Female	0.937948
0	0	23	Male	0.943451
0	0	24	Female	0.937605
0	0	24	Male	0.943219
0	0	25	Female	0.937251
0	0	25	Male	0.94298
0	0	26	Female	0.936886
0	0	26	Male	0.942732
0	0	27	Female	0.936511
0	0	27	Male	0.942476
0	0	28	Female	0.936124
0	0	28	Male	0.942211
0	0	29	Female	0.935726
0	0	29	Male	0.941938
0	0	30	Female	0.935316
0	0	30	Male	0.941656
0	0	31	Female	0.934894
0	0	31	Male	0.941365
0	0	32	Female	0.93446
0	0	32	Male	0.941065
0	0	33	Female	0.934014
0	0	33	Male	0.940755
0	0	34	Female	0.933556
0	0	34	Male	0.940435
0	0	35	Female	0.933085
0	0	35	Male	0.940106
0	0	36	Female	0.932601
0	0	36	Male	0.939766
0	0	37	Female	0.932103
0	0	37	Male	0.939417
0	0	38	Female	0.931593
0	0	38	Male	0.939056
0	0	39	Female	0.931069
0	0	39	Male	0.938686
0	0	40	Female	0.930532
0	0	40	Male	0.938304
0	0	41	Female	0.92998
0	0	41	Male	0.937911
0	0	42	Female	0.929414
0	0	42	Male	0.937507
0	0	43	Female	0.928834
0	0	43	Male	0.937091
0	0	44	Female	0.92824
0	0	44	Male	0.936664
0	0	45	Female	0.927631
0	0	45	Male	0.936224
0	0	46	Female	0.927007
0	0	46	Male	0.935773
0	0	47	Female	0.926368
0	0	47	Male	0.935309
0	0	48	Female	0.925714
0	0	48	Male	0.934832
0	0	49	Female	0.925044
0	0	49	Male	0.934343
0	0	50	Female	0.924359
0	0	50	Male	0.933841
0	0	51	Female	0.923658
0	0	51	Male	0.933326
0	0	52	Female	0.922941
0	0	52	Male	0.932797
0	0	53	Female	0.922207
0	0	53	Male	0.932255
0	0	54	Female	0.921458
0	0	54	Male	0.931699
0	0	55	Female	0.920692
0	0	55	Male	0.93113
0	0	56	Female	0.919909
0	0	56	Male	0.930546
0	0	57	Female	0.91911
0	0	57	Male	0.929947
0	0	58	Female	0.918293
0	0	58	Male	0.929334
0	0	59	Female	0.91746
0	0	59	Male	0.928707
0	0	60	Female	0.916609
0	0	60	Male	0.928064
0	0	61	Female	0.915741
0	0	61	Male	0.927407
0	0	62	Female	0.914855
0	0	62	Male	0.926734
0	0	63	Female	0.913952
0	0	63	Male	0.926046
0	0	64	Female	0.913031
0	0	64	Male	0.925342
0	0	65	Female	0.912092
0	0	65	Male	0.924622
0	0	66	Female	0.911135
0	0	66	Male	0.923887
0	0	67	Female	0.91016
0	0	67	Male	0.923135
0	0	68	Female	0.909166
0	0	68	Male	0.922367
0	0	69	Female	0.908154
0	0	69	Male	0.921582
0	0	70	Female	0.907124
0	0	70	Male	0.920781
0	0	71	Female	0.906075
0	0	71	Male	0.919963
0	0	72	Female	0.905008
0	0	72	Male	0.919129
0	0	73	Female	0.903922
0	0	73	Male	0.918277
0	0	74	Female	0.902817
0	0	74	Male	0.917408
0	0	75	Female	0.901693
0	0	75	Male	0.916521
0	0	76	Female	0.90055
0	0	76	Male	0.915617
0	0	77	Female	0.899388
0	0	77	Male	0.914696
0	0	78	Female	0.898207
0	0	78	Male	0.913757
0	0	79	Female	0.897007
0	0	79	Male	0.9128
0	0	80	Female	0.895788
0	0	80	Male	0.911825
0	0	81	Female	0.894549
0	0	81	Male	0.910832
0	0	82	Female	0.893291
0	0	82	Male	0.90982
0	0	83	Female	0.892014
0	0	83	Male	0.908791
0	0	84	Female	0.890718
0	0	84	Male	0.907743
0	0	85	Female	0.889402
0	0	85	Male	0.906677
0	0	86	Female	0.888067
0	0	86	Male	0.905592
0	0	87	Female	0.886713
0	0	87	Male	0.904489
0	0	88	Female	0.885339
0	0	88	Male	0.903367
0	0	89	Female	0.883946
0	0	89	Male	0.902226
0	0	90	Female	0.882534
0	0	90	Male	0.901066
0	0	91	Female	0.881102
0	0	91	Male	0.899887
0	0	92	Female	0.879651
0	0	92	Male	0.89869
0	0	93	Female	0.87818
0	0	93	Male	0.897473
0	0	94	Female	0.876691
0	0	94	Male	0.896238
0	0	95	Female	0.875182
0	0	95	Male	0.894983
0	0	96	Female	0.873654
0	0	96	Male	0.89371
0	0	97	Female	0.872106
0	0	97	Male	0.892417
0	0	98	Female	0.87054
0	0	98	Male	0.891105
0	0	99	Female	0.868955
0	0	99	Male	0.889774
0	1	18	Female	0.932693
0	1	18	Male	0.939074
0	1	19	Female	0.932297
0	1	19	Male	0.938798
0	1	20	Female	0.93189
0	1	20	Male	0.938513
0	1	21	Female	0.931472
0	1	21	Male	0.93822
0	1	22	Female	0.931043
0	1	22	Male	0.937918
0	1	23	Female	0.930602
0	1	23	Male	0.937607
0	1	24	Female	0.930149
0	1	24	Male	0.937287
0	1	25	Female	0.929684
0	1	25	Male	0.936957
0	1	26	Female	0.929206
0	1	26	Male	0.936618
0	1	27	Female	0.928717
0	1	27	Male	0.936269
0	1	28	Female	0.928214
0	1	28	Male	0.93591
0	1	29	Female	0.927699
0	1	29	Male	0.935541
0	1	30	Female	0.927171
0	1	30	Male	0.935162
0	1	31	Female	0.926629
0	1	31	Male	0.934772
0	1	32	Female	0.926074
0	1	32	Male	0.934371
0	1	33	Female	0.925506
0	1	33	Male	0.933959
0	1	34	Female	0.924924
0	1	34	Male	0.933537
0	1	35	Female	0.924327
0	1	35	Male	0.933102
0	1	36	Female	0.923717
0	1	36	Male	0.932657
0	1	37	Female	0.923092
0	1	37	Male	0.932199
0	1	38	Female	0.922453
0	1	38	Male	0.93173
0	1	39	Female	0.921799
0	1	39	Male	0.931248
0	1	40	Female	0.92113
0	1	40	Male	0.930755
0	1	41	Female	0.920446
0	1	41	Male	0.930248
0	1	42	Female	0.919747
0	1	42	Male	0.929729
0	1	43	Female	0.919032
0	1	43	Male	0.929198
0	1	44	Female	0.918302
0	1	44	Male	0.928653
0	1	45	Female	0.917556
0	1	45	Male	0.928095
0	1	46	Female	0.916794
0	1	46	Male	0.927523
0	1	47	Female	0.916017
0	1	47	Male	0.926938
0	1	48	Female	0.915223
0	1	48	Male	0.926339
0	1	49	Female	0.914413
0	1	49	Male	0.925726
0	1	50	Female	0.913586
0	1	50	Male	0.925098
0	1	51	Female	0.912743
0	1	51	Male	0.924457
0	1	52	Female	0.911883
0	1	52	Male	0.923801
0	1	53	Female	0.911006
0	1	53	Male	0.92313
0	1	54	Female	0.910113
0	1	54	Male	0.922444
0	1	55	Female	0.909202
0	1	55	Male	0.921744
0	1	56	Female	0.908274
0	1	56	Male	0.921028
0	1	57	Female	0.907328
0	1	57	Male	0.920297
0	1	58	Female	0.906366
0	1	58	Male	0.91955
0	1	59	Female	0.905385
0	1	59	Male	0.918788
0	1	60	Female	0.904387
0	1	60	Male	0.918009
0	1	61	Female	0.903371
0	1	61	Male	0.917215
0	1	62	Female	0.902338
0	1	62	Male	0.916405
0	1	63	Female	0.901286
0	1	63	Male	0.915579
0	1	64	Female	0.900217
0	1	64	Male	0.914736
0	1	65	Female	0.899129
0	1	65	Male	0.913876
0	1	66	Female	0.898023
0	1	66	Male	0.913
0	1	67	Female	0.896899
0	1	67	Male	0.912107
0	1	68	Female	0.895757
0	1	68	Male	0.911198
0	1	69	Female	0.894596
0	1	69	Male	0.910271
0	1	70	Female	0.893417
0	1	70	Male	0.909327
0	1	71	Female	0.89222
0	1	71	Male	0.908366
0	1	72	Female	0.891004
0	1	72	Male	0.907388
0	1	73	Female	0.88977
0	1	73	Male	0.906392
0	1	74	Female	0.888517
0	1	74	Male	0.905379
0	1	75	Female	0.887245
0	1	75	Male	0.904348
0	1	76	Female	0.885955
0	1	76	Male	0.903299
0	1	77	Female	0.884647
0	1	77	Male	0.902233
0	1	78	Female	0.883319
0	1	78	Male	0.901148
0	1	79	Female	0.881973
0	1	79	Male	0.900046
0	1	80	Female	0.880609
0	1	80	Male	0.898926
0	1	81	Female	0.879226
0	1	81	Male	0.897788
0	1	82	Female	0.877824
0	1	82	Male	0.896631
0	1	83	Female	0.876404
0	1	83	Male	0.895457
0	1	84	Female	0.874965
0	1	84	Male	0.894264
0	1	85	Female	0.873507
0	1	85	Male	0.893053
0	1	86	Female	0.872031
0	1	86	Male	0.891823
0	1	87	Female	0.870537
0	1	87	Male	0.890576
0	1	88	Female	0.869024
0	1	88	Male	0.88931
0	1	89	Female	0.867492
0	1	89	Male	0.888025
0	1	90	Female	0.865943
0	1	90	Male	0.886723
0	1	91	Female	0.864375
0	1	91	Male	0.885401
0	1	92	Female	0.862789
0	1	92	Male	0.884062
0	1	93	Female	0.861184
0	1	93	Male	0.882704
0	1	94	Female	0.859562
0	1	94	Male	0.881327
0	1	95	Female	0.857921
0	1	95	Male	0.879933
0	1	96	Female	0.856262
0	1	96	Male	0.878519
0	1	97	Female	0.854586
0	1	97	Male	0.877088
0	1	98	Female	0.852892
0	1	98	Male	0.875638
0	1	99	Female	0.85118
0	1	99	Male	0.87417
0	2	18	Female	0.925391
0	2	18	Male	0.933261
0	2	19	Female	0.924889
0	2	19	Male	0.932897
0	2	20	Female	0.924375
0	2	20	Male	0.932523
0	2	21	Female	0.923848
0	2	21	Male	0.93214
0	2	22	Female	0.923309
0	2	22	Male	0.931747
0	2	23	Female	0.922757
0	2	23	Male	0.931343
0	2	24	Female	0.922192
0	2	24	Male	0.930929
0	2	25	Female	0.921614
0	2	25	Male	0.930504
0	2	26	Female	0.921023
0	2	26	Male	0.930068
0	2	27	Female	0.920418
0	2	27	Male	0.929622
0	2	28	Female	0.919799
0	2	28	Male	0.929164
0	2	29	Female	0.919167
0	2	29	Male	0.928694
0	2	30	Female	0.918521
0	2	30	Male	0.928214
0	2	31	Female	0.91786
0	2	31	Male	0.927721
0	2	32	Female	0.917185
0	2	32	Male	0.927217
0	2	33	Female	0.916496
0	2	33	Male	0.9267
0	2	34	Female	0.915792
0	2	34	Male	0.926171
0	2	35	Female	0.915074
0	2	35	Male	0.92563
0	2	36	Female	0.91434
0	2	36	Male	0.925076
0	2	37	Female	0.913591
0	2	37	Male	0.924509
0	2	38	Female	0.912827
0	2	38	Male	0.92393
0	2	39	Female	0.912048
0	2	39	Male	0.923337
0	2	40	Female	0.911253
0	2	40	Male	0.922731
0	2	41	Female	0.910443
0	2	41	Male	0.922111
0	2	42	Female	0.909616
0	2	42	Male	0.921478
0	2	43	Female	0.908774
0	2	43	Male	0.920831
0	2	44	Female	0.907916
0	2	44	Male	0.92017
0	2	45	Female	0.907042
0	2	45	Male	0.919495
0	2	46	Female	0.906151
0	2	46	Male	0.918805
0	2	47	Female	0.905244
0	2	47	Male	0.918101
0	2	48	Female	0.904321
0	2	48	Male	0.917383
0	2	49	Female	0.903381
0	2	49	Male	0.91665
0	2	50	Female	0.902424
0	2	50	Male	0.915902
0	2	51	Female	0.901451
0	2	51	Male	0.915139
0	2	52	Female	0.90046
0	2	52	Male	0.914361
0	2	53	Female	0.899453
0	2	53	Male	0.913567
0	2	54	Female	0.898429
0	2	54	Male	0.912758
0	2	55	Female	0.897387
0	2	55	Male	0.911934
0	2	56	Female	0.896328
0	2	56	Male	0.911094
0	2	57	Female	0.895252
0	2	57	Male	0.910238
0	2	58	Female	0.894159
0	2	58	Male	0.909366
0	2	59	Female	0.893048
0	2	59	Male	0.908478
0	2	60	Female	0.89192
0	2	60	Male	0.907574
0	2	61	Female	0.890775
0	2	61	Male	0.906654
0	2	62	Female	0.889611
0	2	62	Male	0.905717
0	2	63	Female	0.888431
0	2	63	Male	0.904764
0	2	64	Female	0.887232
0	2	64	Male	0.903795
0	2	65	Female	0.886016
0	2	65	Male	0.902808
0	2	66	Female	0.884782
0	2	66	Male	0.901805
0	2	67	Female	0.883531
0	2	67	Male	0.900785
0	2	68	Female	0.882262
0	2	68	Male	0.899749
0	2	69	Female	0.880975
0	2	69	Male	0.898695
0	2	70	Female	0.87967
0	2	70	Male	0.897624
0	2	71	Female	0.878347
0	2	71	Male	0.896537
0	2	72	Female	0.877007
0	2	72	Male	0.895432
0	2	73	Female	0.875649
0	2	73	Male	0.89431
0	2	74	Female	0.874273
0	2	74	Male	0.89317
0	2	75	Female	0.87288
0	2	75	Male	0.892013
0	2	76	Female	0.871468
0	2	76	Male	0.890839
0	2	77	Female	0.870039
0	2	77	Male	0.889648
0	2	78	Female	0.868593
0	2	78	Male	0.888439
0	2	79	Female	0.867128
0	2	79	Male	0.887213
0	2	80	Female	0.865646
0	2	80	Male	0.885969
0	2	81	Female	0.864147
0	2	81	Male	0.884707
0	2	82	Female	0.86263
0	2	82	Male	0.883429
0	2	83	Female	0.861095
0	2	83	Male	0.882132
0	2	84	Female	0.859543
0	2	84	Male	0.880818
0	2	85	Female	0.857973
0	2	85	Male	0.879487
0	2	86	Female	0.856387
0	2	86	Male	0.878138
0	2	87	Female	0.854782
0	2	87	Male	0.876771
0	2	88	Female	0.853161
0	2	88	Male	0.875387
0	2	89	Female	0.851523
0	2	89	Male	0.873985
0	2	90	Female	0.849867
0	2	90	Male	0.872566
0	2	91	Female	0.848195
0	2	91	Male	0.87113
0	2	92	Female	0.846505
0	2	92	Male	0.869676
0	2	93	Female	0.844799
0	2	93	Male	0.868204
0	2	94	Female	0.843076
0	2	94	Male	0.866715
0	2	95	Female	0.841336
0	2	95	Male	0.865209
0	2	96	Female	0.83958
0	2	96	Male	0.863686
0	2	97	Female	0.837807
0	2	97	Male	0.862145
0	2	98	Female	0.836018
0	2	98	Male	0.860587
0	2	99	Female	0.834212
0	2	99	Male	0.859012
0	3	18	Female	0.917766
0	3	18	Male	0.927134
0	3	19	Female	0.917161
0	3	19	Male	0.926682
0	3	20	Female	0.916543
0	3	20	Male	0.926219
0	3	21	Female	0.915912
0	3	21	Male	0.925744
0	3	22	Female	0.915267
0	3	22	Male	0.925259
0	3	23	Female	0.914609
0	3	23	Male	0.924763
0	3	24	Female	0.913937
0	3	24	Male	0.924255
0	3	25	Female	0.913252
0	3	25	Male	0.923735
0	3	26	Female	0.912553
0	3	26	Male	0.923204
0	3	27	Female	0.91184
0	3	27	Male	0.922661
0	3	28	Female	0.911112
0	3	28	Male	0.922106
0	3	29	Female	0.910371
0	3	29	Male	0.921539
0	3	30	Female	0.909614
0	3	30	Male	0.920959
0	3	31	Female	0.908844
0	3	31	Male	0.920367
0	3	32	Female	0.908058
0	3	32	Male	0.919763
0	3	33	Female	0.907258
0	3	33	Male	0.919145
0	3	34	Female	0.906443
0	3	34	Male	0.918515
0	3	35	Female	0.905613
0	3	35	Male	0.917871
0	3	36	Female	0.904767
0	3	36	Male	0.917214
0	3	37	Female	0.903907
0	3	37	Male	0.916544
0	3	38	Female	0.903031
0	3	38	Male	0.91586
0	3	39	Female	0.902139
0	3	39	Male	0.915163
0	3	40	Female	0.901232
0	3	40	Male	0.914451
0	3	41	Female	0.900309
0	3	41	Male	0.913726
0	3	42	Female	0.89937
0	3	42	Male	0.912987
0	3	43	Female	0.898416
0	3	43	Male	0.912233
0	3	44	Female	0.897446
0	3	44	Male	0.911465
0	3	45	Female	0.896459
0	3	45	Male	0.910683
0	3	46	Female	0.895457
0	3	46	Male	0.909886
0	3	47	Female	0.894438
0	3	47	Male	0.909074
0	3	48	Female	0.893403
0	3	48	Male	0.908248
0	3	49	Female	0.892352
0	3	49	Male	0.907406
0	3	50	Female	0.891284
0	3	50	Male	0.90655
0	3	51	Female	0.8902
0	3	51	Male	0.905678
0	3	52	Female	0.889099
0	3	52	Male	0.904792
0	3	53	Female	0.887982
0	3	53	Male	0.903889
0	3	54	Female	0.886848
0	3	54	Male	0.902972
0	3	55	Female	0.885698
0	3	55	Male	0.902039
0	3	56	Female	0.88453
0	3	56	Male	0.90109
0	3	57	Female	0.883347
0	3	57	Male	0.900125
0	3	58	Female	0.882146
0	3	58	Male	0.899145
0	3	59	Female	0.880929
0	3	59	Male	0.898149
0	3	60	Female	0.879695
0	3	60	Male	0.897137
0	3	61	Female	0.878444
0	3	61	Male	0.896109
0	3	62	Female	0.877176
0	3	62	Male	0.895065
0	3	63	Female	0.875892
0	3	63	Male	0.894004
0	3	64	Female	0.87459
0	3	64	Male	0.892928
0	3	65	Female	0.873272
0	3	65	Male	0.891835
0	3	66	Female	0.871937
0	3	66	Male	0.890726
0	3	67	Female	0.870585
0	3	67	Male	0.889601
0	3	68	Female	0.869217
0	3	68	Male	0.888459
0	3	69	Female	0.867831
0	3	69	Male	0.887301
0	3	70	Female	0.866429
0	3	70	Male	0.886126
0	3	71	Female	0.86501
0	3	71	Male	0.884935
0	3	72	Female	0.863574
0	3	72	Male	0.883728
0	3	73	Female	0.862122
0	3	73	Male	0.882504
0	3	74	Female	0.860653
0	3	74	Male	0.881263
0	3	75	Female	0.859167
0	3	75	Male	0.880006
0	3	76	Female	0.857665
0	3	76	Male	0.878732
0	3	77	Female	0.856146
0	3	77	Male	0.877441
0	3	78	Female	0.854611
0	3	78	Male	0.876134
0	3	79	Female	0.853059
0	3	79	Male	0.874811
0	3	80	Female	0.851491
0	3	80	Male	0.873471
0	3	81	Female	0.849906
0	3	81	Male	0.872114
0	3	82	Female	0.848305
0	3	82	Male	0.870741
0	3	83	Female	0.846688
0	3	83	Male	0.869351
0	3	84	Female	0.845055
0	3	84	Male	0.867944
0	3	85	Female	0.843405
0	3	85	Male	0.866521
0	3	86	Female	0.84174
0	3	86	Male	0.865082
0	3	87	Female	0.840059
0	3	87	Male	0.863626
0	3	88	Female	0.838361
0	3	88	Male	0.862154
0	3	89	Female	0.836648
0	3	89	Male	0.860665
0	3	90	Female	0.834919
0	3	90	Male	0.85916
0	3	91	Female	0.833175
0	3	91	Male	0.857639
0	3	92	Female	0.831415
0	3	92	Male	0.856102
0	3	93	Female	0.829639
0	3	93	Male	0.854548
0	3	94	Female	0.827848
0	3	94	Male	0.852978
0	3	95	Female	0.826042
0	3	95	Male	0.851392
0	3	96	Female	0.82422
0	3	96	Male	0.84979
0	3	97	Female	0.822384
0	3	97	Male	0.848172
0	3	98	Female	0.820532
0	3	98	Male	0.846538
0	3	99	Female	0.818666
0	3	99	Male	0.844888
0	4	18	Female	0.910031
0	4	18	Male	0.920818
0	4	19	Female	0.909332
0	4	19	Male	0.920281
0	4	20	Female	0.908621
0	4	20	Male	0.919733
0	4	21	Female	0.907896
0	4	21	Male	0.919174
0	4	22	Female	0.907157
0	4	22	Male	0.918602
0	4	23	Female	0.906405
0	4	23	Male	0.918019
0	4	24	Female	0.905639
0	4	24	Male	0.917424
0	4	25	Female	0.904859
0	4	25	Male	0.916817
0	4	26	Female	0.904065
0	4	26	Male	0.916198
0	4	27	Female	0.903257
0	4	27	Male	0.915567
0	4	28	Female	0.902435
0	4	28	Male	0.914923
0	4	29	Female	0.901599
0	4	29	Male	0.914267
0	4	30	Female	0.900748
0	4	30	Male	0.913598
0	4	31	Female	0.899883
0	4	31	Male	0.912916
0	4	32	Female	0.899003
0	4	32	Male	0.912221
0	4	33	Female	0.898109
0	4	33	Male	0.911513
0	4	34	Female	0.8972
0	4	34	Male	0.910792
0	4	35	Female	0.896276
0	4	35	Male	0.910058
0	4	36	Female	0.895337
0	4	36	Male	0.90931
0	4	37	Female	0.894383
0	4	37	Male	0.908549
0	4	38	Female	0.893414
0	4	38	Male	0.907774
0	4	39	Female	0.89243
0	4	39	Male	0.906986
0	4	40	Female	0.891431
0	4	40	Male	0.906183
0	4	41	Female	0.890416
0	4	41	Male	0.905367
0	4	42	Female	0.889387
0	4	42	Male	0.904536
0	4	43	Female	0.888341
0	4	43	Male	0.903692
0	4	44	Female	0.887281
0	4	44	Male	0.902833
0	4	45	Female	0.886205
0	4	45	Male	0.90196
0	4	46	Female	0.885113
0	4	46	Male	0.901072
0	4	47	Female	0.884006
0	4	47	Male	0.90017
0	4	48	Female	0.882883
0	4	48	Male	0.899254
0	4	49	Female	0.881744
0	4	49	Male	0.898322
0	4	50	Female	0.88059
0	4	50	Male	0.897376
0	4	51	Female	0.87942
0	4	51	Male	0.896416
0	4	52	Female	0.878235
0	4	52	Male	0.89544
0	4	53	Female	0.877033
0	4	53	Male	0.894449
0	4	54	Female	0.875816
0	4	54	Male	0.893444
0	4	55	Female	0.874583
0	4	55	Male	0.892423
0	4	56	Female	0.873335
0	4	56	Male	0.891387
0	4	57	Female	0.87207
0	4	57	Male	0.890336
0	4	58	Female	0.87079
0	4	58	Male	0.88927
0	4	59	Female	0.869494
0	4	59	Male	0.888189
0	4	60	Female	0.868182
0	4	60	Male	0.887092
0	4	61	Female	0.866854
0	4	61	Male	0.88598
0	4	62	Female	0.865511
0	4	62	Male	0.884852
0	4	63	Female	0.864151
0	4	63	Male	0.88371
0	4	64	Female	0.862776
0	4	64	Male	0.882551
0	4	65	Female	0.861385
0	4	65	Male	0.881377
0	4	66	Female	0.859979
0	4	66	Male	0.880188
0	4	67	Female	0.858557
0	4	67	Male	0.878983
0	4	68	Female	0.857119
0	4	68	Male	0.877763
0	4	69	Female	0.855665
0	4	69	Male	0.876527
0	4	70	Female	0.854196
0	4	70	Male	0.875276
0	4	71	Female	0.852711
0	4	71	Male	0.874009
0	4	72	Female	0.851211
0	4	72	Male	0.872726
0	4	73	Female	0.849695
0	4	73	Male	0.871428
0	4	74	Female	0.848163
0	4	74	Male	0.870114
0	4	75	Female	0.846617
0	4	75	Male	0.868785
0	4	76	Female	0.845054
0	4	76	Male	0.86744
0	4	77	Female	0.843477
0	4	77	Male	0.86608
0	4	78	Female	0.841884
0	4	78	Male	0.864704
0	4	79	Female	0.840276
0	4	79	Male	0.863313
0	4	80	Female	0.838653
0	4	80	Male	0.861906
0	4	81	Female	0.837015
0	4	81	Male	0.860484
0	4	82	Female	0.835361
0	4	82	Male	0.859046
0	4	83	Female	0.833693
0	4	83	Male	0.857593
0	4	84	Female	0.83201
0	4	84	Male	0.856125
0	4	85	Female	0.830312
0	4	85	Male	0.854641
0	4	86	Female	0.828599
0	4	86	Male	0.853142
0	4	87	Female	0.826871
0	4	87	Male	0.851628
0	4	88	Female	0.825129
0	4	88	Male	0.850098
0	4	89	Female	0.823372
0	4	89	Male	0.848554
0	4	90	Female	0.821601
0	4	90	Male	0.846994
0	4	91	Female	0.819815
0	4	91	Male	0.845419
0	4	92	Female	0.818015
0	4	92	Male	0.843829
0	4	93	Female	0.816201
0	4	93	Male	0.842224
0	4	94	Female	0.814372
0	4	94	Male	0.840604
0	4	95	Female	0.812529
0	4	95	Male	0.83897
0	4	96	Female	0.810673
0	4	96	Male	0.83732
0	4	97	Female	0.808802
0	4	97	Male	0.835656
0	4	98	Female	0.806918
0	4	98	Male	0.833977
0	4	99	Female	0.805019
0	4	99	Male	0.832284
0	5	18	Female	0.902423
0	5	18	Male	0.914468
0	5	19	Female	0.901647
0	5	19	Male	0.913857
0	5	20	Female	0.900858
0	5	20	Male	0.913234
0	5	21	Female	0.900056
0	5	21	Male	0.9126
0	5	22	Female	0.89924
0	5	22	Male	0.911954
0	5	23	Female	0.898411
0	5	23	Male	0.911296
0	5	24	Female	0.897568
0	5	24	Male	0.910626
0	5	25	Female	0.896712
0	5	25	Male	0.909944
0	5	26	Female	0.895843
0	5	26	Male	0.90925
0	5	27	Female	0.894959
0	5	27	Male	0.908544
0	5	28	Female	0.894062
0	5	28	Male	0.907826
0	5	29	Female	0.893151
0	5	29	Male	0.907094
0	5	30	Female	0.892226
0	5	30	Male	0.906351
0	5	31	Female	0.891288
0	5	31	Male	0.905594
0	5	32	Female	0.890335
0	5	32	Male	0.904825
0	5	33	Female	0.889368
0	5	33	Male	0.904043
0	5	34	Female	0.888387
0	5	34	Male	0.903248
0	5	35	Female	0.887391
0	5	35	Male	0.90244
0	5	36	Female	0.886381
0	5	36	Male	0.901619
0	5	37	Female	0.885358
0	5	37	Male	0.900785
0	5	38	Female	0.884319
0	5	38	Male	0.899937
0	5	39	Female	0.883266
0	5	39	Male	0.899076
0	5	40	Female	0.882199
0	5	40	Male	0.898202
0	5	41	Female	0.881117
0	5	41	Male	0.897314
0	5	42	Female	0.880021
0	5	42	Male	0.896412
0	5	43	Female	0.87891
0	5	43	Male	0.895497
0	5	44	Female	0.877785
0	5	44	Male	0.894568
0	5	45	Female	0.876645
0	5	45	Male	0.893625
0	5	46	Female	0.87549
0	5	46	Male	0.892669
0	5	47	Female	0.874321
0	5	47	Male	0.891698
0	5	48	Female	0.873137
0	5	48	Male	0.890714
0	5	49	Female	0.871938
0	5	49	Male	0.889715
0	5	50	Female	0.870725
0	5	50	Male	0.888703
0	5	51	Female	0.869496
0	5	51	Male	0.887676
0	5	52	Female	0.868253
0	5	52	Male	0.886635
0	5	53	Female	0.866996
0	5	53	Male	0.88558
0	5	54	Female	0.865723
0	5	54	Male	0.884511
0	5	55	Female	0.864436
0	5	55	Male	0.883427
0	5	56	Female	0.863134
0	5	56	Male	0.88233
0	5	57	Female	0.861818
0	5	57	Male	0.881218
0	5	58	Female	0.860486
0	5	58	Male	0.880091
0	5	59	Female	0.85914
0	5	59	Male	0.87895
0	5	60	Female	0.857779
0	5	60	Male	0.877795
0	5	61	Female	0.856404
0	5	61	Male	0.876625
0	5	62	Female	0.855014
0	5	62	Male	0.875441
0	5	63	Female	0.853609
0	5	63	Male	0.874242
0	5	64	Female	0.852189
0	5	64	Male	0.873029
0	5	65	Female	0.850755
0	5	65	Male	0.871802
0	5	66	Female	0.849307
0	5	66	Male	0.87056
0	5	67	Female	0.847843
0	5	67	Male	0.869303
0	5	68	Female	0.846366
0	5	68	Male	0.868032
0	5	69	Female	0.844873
0	5	69	Male	0.866747
0	5	70	Female	0.843367
0	5	70	Male	0.865447
0	5	71	Female	0.841845
0	5	71	Male	0.864132
0	5	72	Female	0.84031
0	5	72	Male	0.862803
0	5	73	Female	0.83876
0	5	73	Male	0.86146
0	5	74	Female	0.837196
0	5	74	Male	0.860102
0	5	75	Female	0.835617
0	5	75	Male	0.85873
0	5	76	Female	0.834025
0	5	76	Male	0.857343
0	5	77	Female	0.832418
0	5	77	Male	0.855942
0	5	78	Female	0.830797
0	5	78	Male	0.854527
0	5	79	Female	0.829162
0	5	79	Male	0.853097
0	5	80	Female	0.827513
0	5	80	Male	0.851653
0	5	81	Female	0.825849
0	5	81	Male	0.850194
0	5	82	Female	0.824172
0	5	82	Male	0.848721
0	5	83	Female	0.822481
0	5	83	Male	0.847234
0	5	84	Female	0.820777
0	5	84	Male	0.845733
0	5	85	Female	0.819058
0	5	85	Male	0.844218
0	5	86	Female	0.817326
0	5	86	Male	0.842688
0	5	87	Female	0.81558
0	5	87	Male	0.841145
0	5	88	Female	0.813821
0	5	88	Male	0.839587
0	5	89	Female	0.812048
0	5	89	Male	0.838015
0	5	90	Female	0.810261
0	5	90	Male	0.83643
0	5	91	Female	0.808462
0	5	91	Male	0.83483
0	5	92	Female	0.806648
0	5	92	Male	0.833216
0	5	93	Female	0.804822
0	5	93	Male	0.831589
0	5	94	Female	0.802982
0	5	94	Male	0.829948
0	5	95	Female	0.80113
0	5	95	Male	0.828293
0	5	96	Female	0.799264
0	5	96	Male	0.826624
0	5	97	Female	0.797385
0	5	97	Male	0.824942
0	5	98	Female	0.795493
0	5	98	Male	0.823246
0	5	99	Female	0.793588
0	5	99	Male	0.821537
0	6	18	Female	0.895172
0	6	18	Male	0.908246
0	6	19	Female	0.894338
0	6	19	Male	0.907575
0	6	20	Female	0.893491
0	6	20	Male	0.906892
0	6	21	Female	0.892631
0	6	21	Male	0.906199
0	6	22	Female	0.891759
0	6	22	Male	0.905494
0	6	23	Female	0.890874
0	6	23	Male	0.904777
0	6	24	Female	0.889976
0	6	24	Male	0.904049
0	6	25	Female	0.889065
0	6	25	Male	0.903309
0	6	26	Female	0.888141
0	6	26	Male	0.902557
0	6	27	Female	0.887204
0	6	27	Male	0.901793
0	6	28	Female	0.886254
0	6	28	Male	0.901018
0	6	29	Female	0.885291
0	6	29	Male	0.90023
0	6	30	Female	0.884315
0	6	30	Male	0.89943
0	6	31	Female	0.883326
0	6	31	Male	0.898618
0	6	32	Female	0.882323
0	6	32	Male	0.897794
0	6	33	Female	0.881308
0	6	33	Male	0.896957
0	6	34	Female	0.880279
0	6	34	Male	0.896108
0	6	35	Female	0.879236
0	6	35	Male	0.895247
0	6	36	Female	0.87818
0	6	36	Male	0.894373
0	6	37	Female	0.877111
0	6	37	Male	0.893486
0	6	38	Female	0.876028
0	6	38	Male	0.892587
0	6	39	Female	0.874932
0	6	39	Male	0.891675
0	6	40	Female	0.873822
0	6	40	Male	0.89075
0	6	41	Female	0.872699
0	6	41	Male	0.889813
0	6	42	Female	0.871562
0	6	42	Male	0.888862
0	6	43	Female	0.870411
0	6	43	Male	0.887899
0	6	44	Female	0.869247
0	6	44	Male	0.886923
0	6	45	Female	0.868069
0	6	45	Male	0.885934
0	6	46	Female	0.866878
0	6	46	Male	0.884932
0	6	47	Female	0.865673
0	6	47	Male	0.883917
0	6	48	Female	0.864454
0	6	48	Male	0.882888
0	6	49	Female	0.863222
0	6	49	Male	0.881847
0	6	50	Female	0.861976
0	6	50	Male	0.880792
0	6	51	Female	0.860717
0	6	51	Male	0.879724
0	6	52	Female	0.859443
0	6	52	Male	0.878643
0	6	53	Female	0.858156
0	6	53	Male	0.877549
0	6	54	Female	0.856856
0	6	54	Male	0.876441
0	6	55	Female	0.855542
0	6	55	Male	0.87532
0	6	56	Female	0.854214
0	6	56	Male	0.874186
0	6	57	Female	0.852872
0	6	57	Male	0.873039
0	6	58	Female	0.851517
0	6	58	Male	0.871878
0	6	59	Female	0.850148
0	6	59	Male	0.870703
0	6	60	Female	0.848766
0	6	60	Male	0.869516
0	6	61	Female	0.84737
0	6	61	Male	0.868315
0	6	62	Female	0.84596
0	6	62	Male	0.8671
0	6	63	Female	0.844537
0	6	63	Male	0.865873
0	6	64	Female	0.8431
0	6	64	Male	0.864631
0	6	65	Female	0.84165
0	6	65	Male	0.863377
0	6	66	Female	0.840186
0	6	66	Male	0.862109
0	6	67	Female	0.838709
0	6	67	Male	0.860827
0	6	68	Female	0.837218
0	6	68	Male	0.859532
0	6	69	Female	0.835714
0	6	69	Male	0.858224
0	6	70	Female	0.834196
0	6	70	Male	0.856902
0	6	71	Female	0.832666
0	6	71	Male	0.855567
0	6	72	Female	0.831121
0	6	72	Male	0.854219
0	6	73	Female	0.829564
0	6	73	Male	0.852857
0	6	74	Female	0.827993
0	6	74	Male	0.851482
0	6	75	Female	0.826409
0	6	75	Male	0.850093
0	6	76	Female	0.824811
0	6	76	Male	0.848691
0	6	77	Female	0.823201
0	6	77	Male	0.847276
0	6	78	Female	0.821577
0	6	78	Male	0.845847
0	6	79	Female	0.819941
0	6	79	Male	0.844406
0	6	80	Female	0.818291
0	6	80	Male	0.842951
0	6	81	Female	0.816628
0	6	81	Male	0.841482
0	6	82	Female	0.814952
0	6	82	Male	0.840001
0	6	83	Female	0.813263
0	6	83	Male	0.838506
0	6	84	Female	0.811562
0	6	84	Male	0.836998
0	6	85	Female	0.809847
0	6	85	Male	0.835477
0	6	86	Female	0.80812
0	6	86	Male	0.833943
0	6	87	Female	0.806379
0	6	87	Male	0.832396
0	6	88	Female	0.804626
0	6	88	Male	0.830836
0	6	89	Female	0.802861
0	6	89	Male	0.829263
0	6	90	Female	0.801083
0	6	90	Male	0.827676
0	6	91	Female	0.799292
0	6	91	Male	0.826077
0	6	92	Female	0.797488
0	6	92	Male	0.824465
0	6	93	Female	0.795672
0	6	93	Male	0.82284
0	6	94	Female	0.793844
0	6	94	Male	0.821202
0	6	95	Female	0.792003
0	6	95	Male	0.819551
0	6	96	Female	0.79015
0	6	96	Male	0.817888
0	6	97	Female	0.788284
0	6	97	Male	0.816212
0	6	98	Female	0.786406
0	6	98	Male	0.814523
0	6	99	Female	0.784516
0	6	99	Male	0.812821
0	7	18	Female	0.888458
0	7	18	Male	0.902293
0	7	19	Female	0.887586
0	7	19	Male	0.90158
0	7	20	Female	0.886703
0	7	20	Male	0.900855
0	7	21	Female	0.885807
0	7	21	Male	0.900119
0	7	22	Female	0.884899
0	7	22	Male	0.899373
0	7	23	Female	0.88398
0	7	23	Male	0.898616
0	7	24	Female	0.883049
0	7	24	Male	0.897847
0	7	25	Female	0.882105
0	7	25	Male	0.897068
0	7	26	Female	0.881149
0	7	26	Male	0.896277
0	7	27	Female	0.880182
0	7	27	Male	0.895475
0	7	28	Female	0.879202
0	7	28	Male	0.894662
0	7	29	Female	0.87821
0	7	29	Male	0.893837
0	7	30	Female	0.877206
0	7	30	Male	0.893001
0	7	31	Female	0.876189
0	7	31	Male	0.892154
0	7	32	Female	0.87516
0	7	32	Male	0.891295
0	7	33	Female	0.874119
0	7	33	Male	0.890424
0	7	34	Female	0.873066
0	7	34	Male	0.889542
0	7	35	Female	0.872
0	7	35	Male	0.888648
0	7	36	Female	0.870921
0	7	36	Male	0.887743
0	7	37	Female	0.869831
0	7	37	Male	0.886826
0	7	38	Female	0.868727
0	7	38	Male	0.885897
0	7	39	Female	0.867612
0	7	39	Male	0.884956
0	7	40	Female	0.866484
0	7	40	Male	0.884003
0	7	41	Female	0.865343
0	7	41	Male	0.883038
0	7	42	Female	0.86419
0	7	42	Male	0.882062
0	7	43	Female	0.863024
0	7	43	Male	0.881073
0	7	44	Female	0.861846
0	7	44	Male	0.880073
0	7	45	Female	0.860655
0	7	45	Male	0.87906
0	7	46	Female	0.859451
0	7	46	Male	0.878035
0	7	47	Female	0.858235
0	7	47	Male	0.876999
0	7	48	Female	0.857006
0	7	48	Male	0.87595
0	7	49	Female	0.855765
0	7	49	Male	0.874889
0	7	50	Female	0.854511
0	7	50	Male	0.873815
0	7	51	Female	0.853244
0	7	51	Male	0.87273
0	7	52	Female	0.851965
0	7	52	Male	0.871632
0	7	53	Female	0.850673
0	7	53	Male	0.870522
0	7	54	Female	0.849369
0	7	54	Male	0.8694
0	7	55	Female	0.848052
0	7	55	Male	0.868266
0	7	56	Female	0.846722
0	7	56	Male	0.867119
0	7	57	Female	0.84538
0	7	57	Male	0.86596
0	7	58	Female	0.844025
0	7	58	Male	0.864788
0	7	59	Female	0.842657
0	7	59	Male	0.863605
0	7	60	Female	0.841277
0	7	60	Male	0.862409
0	7	61	Female	0.839885
0	7	61	Male	0.8612
0	7	62	Female	0.838479
0	7	62	Male	0.85998
0	7	63	Female	0.837061
0	7	63	Male	0.858746
0	7	64	Female	0.835631
0	7	64	Male	0.857501
0	7	65	Female	0.834188
0	7	65	Male	0.856243
0	7	66	Female	0.832732
0	7	66	Male	0.854973
0	7	67	Female	0.831264
0	7	67	Male	0.85369
0	7	68	Female	0.829784
0	7	68	Male	0.852395
0	7	69	Female	0.828291
0	7	69	Male	0.851088
0	7	70	Female	0.826785
0	7	70	Male	0.849768
0	7	71	Female	0.825267
0	7	71	Male	0.848436
0	7	72	Female	0.823736
0	7	72	Male	0.847091
0	7	73	Female	0.822194
0	7	73	Male	0.845734
0	7	74	Female	0.820638
0	7	74	Male	0.844365
0	7	75	Female	0.81907
0	7	75	Male	0.842984
0	7	76	Female	0.81749
0	7	76	Male	0.84159
0	7	77	Female	0.815898
0	7	77	Male	0.840183
0	7	78	Female	0.814293
0	7	78	Male	0.838765
0	7	79	Female	0.812676
0	7	79	Male	0.837334
0	7	80	Female	0.811046
0	7	80	Male	0.835891
0	7	81	Female	0.809405
0	7	81	Male	0.834435
0	7	82	Female	0.807751
0	7	82	Male	0.832967
0	7	83	Female	0.806085
0	7	83	Male	0.831487
0	7	84	Female	0.804406
0	7	84	Male	0.829995
0	7	85	Female	0.802716
0	7	85	Male	0.82849
0	7	86	Female	0.801013
0	7	86	Male	0.826973
0	7	87	Female	0.799299
0	7	87	Male	0.825444
0	7	88	Female	0.797572
0	7	88	Male	0.823903
0	7	89	Female	0.795833
0	7	89	Male	0.82235
0	7	90	Female	0.794082
0	7	90	Male	0.820784
0	7	91	Female	0.792319
0	7	91	Male	0.819206
0	7	92	Female	0.790544
0	7	92	Male	0.817616
0	7	93	Female	0.788757
0	7	93	Male	0.816014
0	7	94	Female	0.786959
0	7	94	Male	0.8144
0	7	95	Female	0.785148
0	7	95	Male	0.812774
0	7	96	Female	0.783326
0	7	96	Male	0.811136
0	7	97	Female	0.781491
0	7	97	Male	0.809486
0	7	98	Female	0.779645
0	7	98	Male	0.807824
0	7	99	Female	0.777788
0	7	99	Male	0.80615
0	8	18	Female	0.882387
0	8	18	Male	0.896703
0	8	19	Female	0.881498
0	8	19	Male	0.895964
0	8	20	Female	0.880597
0	8	20	Male	0.895214
0	8	21	Female	0.879686
0	8	21	Male	0.894455
0	8	22	Female	0.878764
0	8	22	Male	0.893685
0	8	23	Female	0.877831
0	8	23	Male	0.892906
0	8	24	Female	0.876887
0	8	24	Male	0.892115
0	8	25	Female	0.875931
0	8	25	Male	0.891315
0	8	26	Female	0.874965
0	8	26	Male	0.890504
0	8	27	Female	0.873987
0	8	27	Male	0.889683
0	8	28	Female	0.872998
0	8	28	Male	0.888851
0	8	29	Female	0.871998
0	8	29	Male	0.888009
0	8	30	Female	0.870987
0	8	30	Male	0.887156
0	8	31	Female	0.869964
0	8	31	Male	0.886293
0	8	32	Female	0.86893
0	8	32	Male	0.885419
0	8	33	Female	0.867885
0	8	33	Male	0.884534
0	8	34	Female	0.866829
0	8	34	Male	0.883639
0	8	35	Female	0.865761
0	8	35	Male	0.882733
0	8	36	Female	0.864681
0	8	36	Male	0.881816
0	8	37	Female	0.86359
0	8	37	Male	0.880888
0	8	38	Female	0.862488
0	8	38	Male	0.87995
0	8	39	Female	0.861374
0	8	39	Male	0.879
0	8	40	Female	0.860249
0	8	40	Male	0.87804
0	8	41	Female	0.859112
0	8	41	Male	0.877069
0	8	42	Female	0.857964
0	8	42	Male	0.876086
0	8	43	Female	0.856804
0	8	43	Male	0.875093
0	8	44	Female	0.855633
0	8	44	Male	0.874089
0	8	45	Female	0.85445
0	8	45	Male	0.873073
0	8	46	Female	0.853255
0	8	46	Male	0.872047
0	8	47	Female	0.852049
0	8	47	Male	0.871009
0	8	48	Female	0.850831
0	8	48	Male	0.86996
0	8	49	Female	0.849602
0	8	49	Male	0.868901
0	8	50	Female	0.84836
0	8	50	Male	0.867829
0	8	51	Female	0.847108
0	8	51	Male	0.866747
0	8	52	Female	0.845843
0	8	52	Male	0.865654
0	8	53	Female	0.844567
0	8	53	Male	0.864549
0	8	54	Female	0.843279
0	8	54	Male	0.863433
0	8	55	Female	0.84198
0	8	55	Male	0.862305
0	8	56	Female	0.840669
0	8	56	Male	0.861167
0	8	57	Female	0.839346
0	8	57	Male	0.860017
0	8	58	Female	0.838011
0	8	58	Male	0.858856
0	8	59	Female	0.836665
0	8	59	Male	0.857683
0	8	60	Female	0.835307
0	8	60	Male	0.856499
0	8	61	Female	0.833938
0	8	61	Male	0.855304
0	8	62	Female	0.832556
0	8	62	Male	0.854097
0	8	63	Female	0.831163
0	8	63	Male	0.852879
0	8	64	Female	0.829758
0	8	64	Male	0.851649
0	8	65	Female	0.828342
0	8	65	Male	0.850408
0	8	66	Female	0.826914
0	8	66	Male	0.849156
0	8	67	Female	0.825474
0	8	67	Male	0.847892
0	8	68	Female	0.824022
0	8	68	Male	0.846617
0	8	69	Female	0.822559
0	8	69	Male	0.84533
0	8	70	Female	0.821084
0	8	70	Male	0.844032
0	8	71	Female	0.819597
0	8	71	Male	0.842722
0	8	72	Female	0.818099
0	8	72	Male	0.841401
0	8	73	Female	0.816588
0	8	73	Male	0.840069
0	8	74	Female	0.815067
0	8	74	Male	0.838725
0	8	75	Female	0.813533
0	8	75	Male	0.837369
0	8	76	Female	0.811988
0	8	76	Male	0.836002
0	8	77	Female	0.810431
0	8	77	Male	0.834624
0	8	78	Female	0.808863
0	8	78	Male	0.833234
0	8	79	Female	0.807282
0	8	79	Male	0.831832
0	8	80	Female	0.805691
0	8	80	Male	0.830419
0	8	81	Female	0.804087
0	8	81	Male	0.828995
0	8	82	Female	0.802472
0	8	82	Male	0.827559
0	8	83	Female	0.800846
0	8	83	Male	0.826111
0	8	84	Female	0.799207
0	8	84	Male	0.824652
0	8	85	Female	0.797558
0	8	85	Male	0.823182
0	8	86	Female	0.795896
0	8	86	Male	0.8217
0	8	87	Female	0.794223
0	8	87	Male	0.820207
0	8	88	Female	0.792539
0	8	88	Male	0.818702
0	8	89	Female	0.790842
0	8	89	Male	0.817186
0	8	90	Female	0.789135
0	8	90	Male	0.815658
0	8	91	Female	0.787416
0	8	91	Male	0.814119
0	8	92	Female	0.785685
0	8	92	Male	0.812568
0	8	93	Female	0.783943
0	8	93	Male	0.811006
0	8	94	Female	0.782189
0	8	94	Male	0.809432
0	8	95	Female	0.780424
0	8	95	Male	0.807847
0	8	96	Female	0.778647
0	8	96	Male	0.806251
0	8	97	Female	0.77686
0	8	97	Male	0.804643
0	8	98	Female	0.77506
0	8	98	Male	0.803024
0	8	99	Female	0.773249
0	8	99	Male	0.801393
0	9	18	Female	0.876971
0	9	18	Male	0.891497
0	9	19	Female	0.876082
0	9	19	Male	0.890748
0	9	20	Female	0.875183
0	9	20	Male	0.889991
0	9	21	Female	0.874274
0	9	21	Male	0.889224
0	9	22	Female	0.873355
0	9	22	Male	0.888448
0	9	23	Female	0.872426
0	9	23	Male	0.887662
0	9	24	Female	0.871487
0	9	24	Male	0.886867
0	9	25	Female	0.870537
0	9	25	Male	0.886063
0	9	26	Female	0.869578
0	9	26	Male	0.885249
0	9	27	Female	0.868608
0	9	27	Male	0.884425
0	9	28	Female	0.867628
0	9	28	Male	0.883592
0	9	29	Female	0.866638
0	9	29	Male	0.88275
0	9	30	Female	0.865638
0	9	30	Male	0.881897
0	9	31	Female	0.864627
0	9	31	Male	0.881035
0	9	32	Female	0.863606
0	9	32	Male	0.880164
0	9	33	Female	0.862575
0	9	33	Male	0.879282
0	9	34	Female	0.861533
0	9	34	Male	0.878391
0	9	35	Female	0.860481
0	9	35	Male	0.87749
0	9	36	Female	0.859418
0	9	36	Male	0.876579
0	9	37	Female	0.858345
0	9	37	Male	0.875658
0	9	38	Female	0.857261
0	9	38	Male	0.874728
0	9	39	Female	0.856167
0	9	39	Male	0.873787
0	9	40	Female	0.855062
0	9	40	Male	0.872836
0	9	41	Female	0.853946
0	9	41	Male	0.871876
0	9	42	Female	0.85282
0	9	42	Male	0.870905
0	9	43	Female	0.851684
0	9	43	Male	0.869924
0	9	44	Female	0.850537
0	9	44	Male	0.868934
0	9	45	Female	0.849379
0	9	45	Male	0.867933
0	9	46	Female	0.84821
0	9	46	Male	0.866922
0	9	47	Female	0.847031
0	9	47	Male	0.865901
0	9	48	Female	0.845841
0	9	48	Male	0.864869
0	9	49	Female	0.84464
0	9	49	Male	0.863828
0	9	50	Female	0.843429
0	9	50	Male	0.862776
0	9	51	Female	0.842206
0	9	51	Male	0.861714
0	9	52	Female	0.840973
0	9	52	Male	0.860641
0	9	53	Female	0.839729
0	9	53	Male	0.859559
0	9	54	Female	0.838475
0	9	54	Male	0.858466
0	9	55	Female	0.837209
0	9	55	Male	0.857362
0	9	56	Female	0.835933
0	9	56	Male	0.856249
0	9	57	Female	0.834646
0	9	57	Male	0.855124
0	9	58	Female	0.833347
0	9	58	Male	0.85399
0	9	59	Female	0.832038
0	9	59	Male	0.852845
0	9	60	Female	0.830718
0	9	60	Male	0.85169
0	9	61	Female	0.829388
0	9	61	Male	0.850524
0	9	62	Female	0.828046
0	9	62	Male	0.849347
0	9	63	Female	0.826693
0	9	63	Male	0.84816
0	9	64	Female	0.825329
0	9	64	Male	0.846963
0	9	65	Female	0.823955
0	9	65	Male	0.845755
0	9	66	Female	0.822569
0	9	66	Male	0.844536
0	9	67	Female	0.821172
0	9	67	Male	0.843307
0	9	68	Female	0.819765
0	9	68	Male	0.842067
0	9	69	Female	0.818346
0	9	69	Male	0.840817
0	9	70	Female	0.816916
0	9	70	Male	0.839556
0	9	71	Female	0.815476
0	9	71	Male	0.838284
0	9	72	Female	0.814024
0	9	72	Male	0.837002
0	9	73	Female	0.812561
0	9	73	Male	0.835709
0	9	74	Female	0.811087
0	9	74	Male	0.834405
0	9	75	Female	0.809602
0	9	75	Male	0.833091
0	9	76	Female	0.808107
0	9	76	Male	0.831766
0	9	77	Female	0.8066
0	9	77	Male	0.83043
0	9	78	Female	0.805081
0	9	78	Male	0.829084
0	9	79	Female	0.803552
0	9	79	Male	0.827726
0	9	80	Female	0.802012
0	9	80	Male	0.826358
0	9	81	Female	0.800461
0	9	81	Male	0.824979
0	9	82	Female	0.798898
0	9	82	Male	0.82359
0	9	83	Female	0.797325
0	9	83	Male	0.822189
0	9	84	Female	0.79574
0	9	84	Male	0.820778
0	9	85	Female	0.794145
0	9	85	Male	0.819356
0	9	86	Female	0.792538
0	9	86	Male	0.817923
0	9	87	Female	0.79092
0	9	87	Male	0.816479
0	9	88	Female	0.789291
0	9	88	Male	0.815025
0	9	89	Female	0.787651
0	9	89	Male	0.81356
0	9	90	Female	0.786
0	9	90	Male	0.812083
0	9	91	Female	0.784337
0	9	91	Male	0.810596
0	9	92	Female	0.782664
0	9	92	Male	0.809098
0	9	93	Female	0.780979
0	9	93	Male	0.807589
0	9	94	Female	0.779284
0	9	94	Male	0.80607
0	9	95	Female	0.777577
0	9	95	Male	0.804539
0	9	96	Female	0.775859
0	9	96	Male	0.802997
0	9	97	Female	0.77413
0	9	97	Male	0.801445
0	9	98	Female	0.77239
0	9	98	Male	0.799882
0	9	99	Female	0.770639
0	9	99	Male	0.798307
0	10	18	Female	0.872126
0	10	18	Male	0.886619
0	10	19	Female	0.871252
0	10	19	Male	0.885875
0	10	20	Female	0.870369
0	10	20	Male	0.885123
0	10	21	Female	0.869477
0	10	21	Male	0.884363
0	10	22	Female	0.868575
0	10	22	Male	0.883594
0	10	23	Female	0.867665
0	10	23	Male	0.882817
0	10	24	Female	0.866745
0	10	24	Male	0.882031
0	10	25	Female	0.865817
0	10	25	Male	0.881236
0	10	26	Female	0.864879
0	10	26	Male	0.880433
0	10	27	Female	0.863931
0	10	27	Male	0.879622
0	10	28	Female	0.862975
0	10	28	Male	0.878801
0	10	29	Female	0.862009
0	10	29	Male	0.877972
0	10	30	Female	0.861033
0	10	30	Male	0.877134
0	10	31	Female	0.860049
0	10	31	Male	0.876288
0	10	32	Female	0.859055
0	10	32	Male	0.875432
0	10	33	Female	0.858051
0	10	33	Male	0.874568
0	10	34	Female	0.857038
0	10	34	Male	0.873695
0	10	35	Female	0.856015
0	10	35	Male	0.872813
0	10	36	Female	0.854983
0	10	36	Male	0.871922
0	10	37	Female	0.853941
0	10	37	Male	0.871022
0	10	38	Female	0.852889
0	10	38	Male	0.870113
0	10	39	Female	0.851828
0	10	39	Male	0.869195
0	10	40	Female	0.850758
0	10	40	Male	0.868268
0	10	41	Female	0.849677
0	10	41	Male	0.867332
0	10	42	Female	0.848587
0	10	42	Male	0.866387
0	10	43	Female	0.847487
0	10	43	Male	0.865432
0	10	44	Female	0.846377
0	10	44	Male	0.864469
0	10	45	Female	0.845258
0	10	45	Male	0.863496
0	10	46	Female	0.844128
0	10	46	Male	0.862514
0	10	47	Female	0.842989
0	10	47	Male	0.861523
0	10	48	Female	0.84184
0	10	48	Male	0.860522
0	10	49	Female	0.840681
0	10	49	Male	0.859512
0	10	50	Female	0.839512
0	10	50	Male	0.858493
0	10	51	Female	0.838333
0	10	51	Male	0.857464
0	10	52	Female	0.837144
0	10	52	Male	0.856426
0	10	53	Female	0.835945
0	10	53	Male	0.855378
0	10	54	Female	0.834736
0	10	54	Male	0.854321
0	10	55	Female	0.833517
0	10	55	Male	0.853255
0	10	56	Female	0.832287
0	10	56	Male	0.852179
0	10	57	Female	0.831048
0	10	57	Male	0.851093
0	10	58	Female	0.829799
0	10	58	Male	0.849998
0	10	59	Female	0.828539
0	10	59	Male	0.848893
0	10	60	Female	0.827269
0	10	60	Male	0.847779
0	10	61	Female	0.825989
0	10	61	Male	0.846655
0	10	62	Female	0.824699
0	10	62	Male	0.845521
0	10	63	Female	0.823399
0	10	63	Male	0.844378
0	10	64	Female	0.822088
0	10	64	Male	0.843225
0	10	65	Female	0.820767
0	10	65	Male	0.842062
0	10	66	Female	0.819436
0	10	66	Male	0.840889
0	10	67	Female	0.818094
0	10	67	Male	0.839707
0	10	68	Female	0.816742
0	10	68	Male	0.838515
0	10	69	Female	0.81538
0	10	69	Male	0.837313
0	10	70	Female	0.814007
0	10	70	Male	0.836101
0	10	71	Female	0.812624
0	10	71	Male	0.834879
0	10	72	Female	0.811231
0	10	72	Male	0.833647
0	10	73	Female	0.809827
0	10	73	Male	0.832405
0	10	74	Female	0.808412
0	10	74	Male	0.831153
0	10	75	Female	0.806987
0	10	75	Male	0.829892
0	10	76	Female	0.805552
0	10	76	Male	0.82862
0	10	77	Female	0.804106
0	10	77	Male	0.827338
0	10	78	Female	0.80265
0	10	78	Male	0.826047
0	10	79	Female	0.801183
0	10	79	Male	0.824745
0	10	80	Female	0.799705
0	10	80	Male	0.823433
0	10	81	Female	0.798217
0	10	81	Male	0.822111
0	10	82	Female	0.796719
0	10	82	Male	0.820779
0	10	83	Female	0.795209
0	10	83	Male	0.819436
0	10	84	Female	0.79369
0	10	84	Male	0.818084
0	10	85	Female	0.792159
0	10	85	Male	0.816721
0	10	86	Female	0.790618
0	10	86	Male	0.815348
0	10	87	Female	0.789066
0	10	87	Male	0.813965
0	10	88	Female	0.787504
0	10	88	Male	0.812572
0	10	89	Female	0.785931
0	10	89	Male	0.811168
0	10	90	Female	0.784347
0	10	90	Male	0.809754
0	10	91	Female	0.782753
0	10	91	Male	0.80833
0	10	92	Female	0.781148
0	10	92	Male	0.806895
0	10	93	Female	0.779532
0	10	93	Male	0.805451
0	10	94	Female	0.777905
0	10	94	Male	0.803995
0	10	95	Female	0.776268
0	10	95	Male	0.80253
0	10	96	Female	0.77462
0	10	96	Male	0.801054
0	10	97	Female	0.772962
0	10	97	Male	0.799567
0	10	98	Female	0.771292
0	10	98	Male	0.798071
0	10	99	Female	0.769612
0	10	99	Male	0.796564
0	11	18	Female	0.867685
0	11	18	Male	0.881937
0	11	19	Female	0.866837
0	11	19	Male	0.881209
0	11	20	Female	0.86598
0	11	20	Male	0.880473
0	11	21	Female	0.865116
0	11	21	Male	0.87973
0	11	22	Female	0.864243
0	11	22	Male	0.87898
0	11	23	Female	0.863362
0	11	23	Male	0.878221
0	11	24	Female	0.862473
0	11	24	Male	0.877455
0	11	25	Female	0.861576
0	11	25	Male	0.876682
0	11	26	Female	0.86067
0	11	26	Male	0.8759
0	11	27	Female	0.859755
0	11	27	Male	0.875111
0	11	28	Female	0.858832
0	11	28	Male	0.874314
0	11	29	Female	0.857901
0	11	29	Male	0.873509
0	11	30	Female	0.856961
0	11	30	Male	0.872696
0	11	31	Female	0.856013
0	11	31	Male	0.871876
0	11	32	Female	0.855056
0	11	32	Male	0.871047
0	11	33	Female	0.85409
0	11	33	Male	0.87021
0	11	34	Female	0.853116
0	11	34	Male	0.869366
0	11	35	Female	0.852133
0	11	35	Male	0.868513
0	11	36	Female	0.851141
0	11	36	Male	0.867652
0	11	37	Female	0.850141
0	11	37	Male	0.866784
0	11	38	Female	0.849132
0	11	38	Male	0.865907
0	11	39	Female	0.848114
0	11	39	Male	0.865021
0	11	40	Female	0.847087
0	11	40	Male	0.864128
0	11	41	Female	0.846051
0	11	41	Male	0.863226
0	11	42	Female	0.845007
0	11	42	Male	0.862316
0	11	43	Female	0.843953
0	11	43	Male	0.861398
0	11	44	Female	0.842891
0	11	44	Male	0.860472
0	11	45	Female	0.841819
0	11	45	Male	0.859537
0	11	46	Female	0.840738
0	11	46	Male	0.858594
0	11	47	Female	0.839649
0	11	47	Male	0.857642
0	11	48	Female	0.83855
0	11	48	Male	0.856682
0	11	49	Female	0.837442
0	11	49	Male	0.855713
0	11	50	Female	0.836325
0	11	50	Male	0.854736
0	11	51	Female	0.835198
0	11	51	Male	0.85375
0	11	52	Female	0.834063
0	11	52	Male	0.852756
0	11	53	Female	0.832918
0	11	53	Male	0.851753
0	11	54	Female	0.831764
0	11	54	Male	0.850741
0	11	55	Female	0.8306
0	11	55	Male	0.849721
0	11	56	Female	0.829427
0	11	56	Male	0.848692
0	11	57	Female	0.828245
0	11	57	Male	0.847654
0	11	58	Female	0.827054
0	11	58	Male	0.846607
0	11	59	Female	0.825853
0	11	59	Male	0.845552
0	11	60	Female	0.824642
0	11	60	Male	0.844488
0	11	61	Female	0.823422
0	11	61	Male	0.843414
0	11	62	Female	0.822192
0	11	62	Male	0.842332
0	11	63	Female	0.820953
0	11	63	Male	0.841241
0	11	64	Female	0.819704
0	11	64	Male	0.840142
0	11	65	Female	0.818446
0	11	65	Male	0.839033
0	11	66	Female	0.817178
0	11	66	Male	0.837915
0	11	67	Female	0.8159
0	11	67	Male	0.836788
0	11	68	Female	0.814613
0	11	68	Male	0.835652
0	11	69	Female	0.813316
0	11	69	Male	0.834507
0	11	70	Female	0.812009
0	11	70	Male	0.833352
0	11	71	Female	0.810693
0	11	71	Male	0.832189
0	11	72	Female	0.809366
0	11	72	Male	0.831016
0	11	73	Female	0.80803
0	11	73	Male	0.829834
0	11	74	Female	0.806684
0	11	74	Male	0.828643
0	11	75	Female	0.805328
0	11	75	Male	0.827442
0	11	76	Female	0.803962
0	11	76	Male	0.826233
0	11	77	Female	0.802586
0	11	77	Male	0.825013
0	11	78	Female	0.8012
0	11	78	Male	0.823785
0	11	79	Female	0.799804
0	11	79	Male	0.822547
0	11	80	Female	0.798399
0	11	80	Male	0.8213
0	11	81	Female	0.796983
0	11	81	Male	0.820043
0	11	82	Female	0.795557
0	11	82	Male	0.818777
0	11	83	Female	0.794121
0	11	83	Male	0.817501
0	11	84	Female	0.792675
0	11	84	Male	0.816215
0	11	85	Female	0.791219
0	11	85	Male	0.81492
0	11	86	Female	0.789753
0	11	86	Male	0.813616
0	11	87	Female	0.788276
0	11	87	Male	0.812302
0	11	88	Female	0.78679
0	11	88	Male	0.810978
0	11	89	Female	0.785293
0	11	89	Male	0.809644
0	11	90	Female	0.783786
0	11	90	Male	0.808301
0	11	91	Female	0.782269
0	11	91	Male	0.806948
0	11	92	Female	0.780742
0	11	92	Male	0.805586
0	11	93	Female	0.779204
0	11	93	Male	0.804213
0	11	94	Female	0.777656
0	11	94	Male	0.802831
0	11	95	Female	0.776098
0	11	95	Male	0.801439
0	11	96	Female	0.774529
0	11	96	Male	0.800037
0	11	97	Female	0.77295
0	11	97	Male	0.798626
0	11	98	Female	0.771361
0	11	98	Male	0.797204
0	11	99	Female	0.769761
0	11	99	Male	0.795773
0	12	18	Female	0.863413
0	12	18	Male	0.877257
0	12	19	Female	0.862599
0	12	19	Male	0.876552
0	12	20	Female	0.861777
0	12	20	Male	0.875841
0	12	21	Female	0.860948
0	12	21	Male	0.875123
0	12	22	Female	0.860111
0	12	22	Male	0.874398
0	12	23	Female	0.859267
0	12	23	Male	0.873666
0	12	24	Female	0.858415
0	12	24	Male	0.872927
0	12	25	Female	0.857556
0	12	25	Male	0.872182
0	12	26	Female	0.856689
0	12	26	Male	0.871429
0	12	27	Female	0.855815
0	12	27	Male	0.87067
0	12	28	Female	0.854933
0	12	28	Male	0.869903
0	12	29	Female	0.854044
0	12	29	Male	0.86913
0	12	30	Female	0.853146
0	12	30	Male	0.868349
0	12	31	Female	0.852241
0	12	31	Male	0.867562
0	12	32	Female	0.851329
0	12	32	Male	0.866767
0	12	33	Female	0.850408
[truncated: 99,025 more rows]

## Sheet: P-V
PHQ9	age	sex	P-V12
0	18	Female	0.939596
0	18	Male	0.947123
0	19	Female	0.939086
0	19	Male	0.94671
0	20	Female	0.93857
0	20	Male	0.946291
0	21	Female	0.938047
0	21	Male	0.945866
0	22	Female	0.937516
0	22	Male	0.945435
0	23	Female	0.936979
0	23	Male	0.944997
0	24	Female	0.936434
0	24	Male	0.944553
0	25	Female	0.935882
0	25	Male	0.944102
0	26	Female	0.935323
0	26	Male	0.943645
0	27	Female	0.934757
0	27	Male	0.943181
0	28	Female	0.934183
0	28	Male	0.94271
0	29	Female	0.933602
0	29	Male	0.942233
0	30	Female	0.933014
0	30	Male	0.941749
0	31	Female	0.932418
0	31	Male	0.941258
0	32	Female	0.931815
0	32	Male	0.94076
0	33	Female	0.931205
0	33	Male	0.940256
0	34	Female	0.930587
0	34	Male	0.939744
0	35	Female	0.929961
0	35	Male	0.939225
0	36	Female	0.929328
0	36	Male	0.9387
0	37	Female	0.928687
0	37	Male	0.938167
0	38	Female	0.928039
0	38	Male	0.937627
0	39	Female	0.927383
0	39	Male	0.93708
0	40	Female	0.926719
0	40	Male	0.936526
0	41	Female	0.926048
0	41	Male	0.935964
0	42	Female	0.925369
0	42	Male	0.935395
0	43	Female	0.924682
0	43	Male	0.934819
0	44	Female	0.923988
0	44	Male	0.934235
0	45	Female	0.923285
0	45	Male	0.933644
0	46	Female	0.922575
0	46	Male	0.933045
0	47	Female	0.921858
0	47	Male	0.932439
0	48	Female	0.921132
0	48	Male	0.931826
0	49	Female	0.920399
0	49	Male	0.931205
0	50	Female	0.919658
0	50	Male	0.930576
0	51	Female	0.918909
0	51	Male	0.929939
0	52	Female	0.918152
0	52	Male	0.929295
0	53	Female	0.917388
0	53	Male	0.928644
0	54	Female	0.916616
0	54	Male	0.927984
0	55	Female	0.915835
0	55	Male	0.927317
0	56	Female	0.915048
0	56	Male	0.926643
0	57	Female	0.914252
0	57	Male	0.92596
0	58	Female	0.913448
0	58	Male	0.92527
0	59	Female	0.912637
0	59	Male	0.924572
0	60	Female	0.911818
0	60	Male	0.923866
0	61	Female	0.910991
0	61	Male	0.923152
0	62	Female	0.910157
0	62	Male	0.922431
0	63	Female	0.909315
0	63	Male	0.921701
0	64	Female	0.908465
0	64	Male	0.920964
0	65	Female	0.907607
0	65	Male	0.920219
0	66	Female	0.906742
0	66	Male	0.919466
0	67	Female	0.905869
0	67	Male	0.918706
0	68	Female	0.904988
0	68	Male	0.917937
0	69	Female	0.9041
0	69	Male	0.917161
0	70	Female	0.903204
0	70	Male	0.916377
0	71	Female	0.9023
0	71	Male	0.915585
0	72	Female	0.90139
0	72	Male	0.914785
0	73	Female	0.900471
0	73	Male	0.913977
0	74	Female	0.899545
0	74	Male	0.913162
0	75	Female	0.898612
0	75	Male	0.912338
0	76	Female	0.897671
0	76	Male	0.911507
0	77	Female	0.896723
0	77	Male	0.910668
0	78	Female	0.895767
0	78	Male	0.909822
0	79	Female	0.894805
0	79	Male	0.908967
0	80	Female	0.893835
0	80	Male	0.908105
0	81	Female	0.892857
0	81	Male	0.907235
0	82	Female	0.891873
0	82	Male	0.906358
0	83	Female	0.890881
0	83	Male	0.905473
0	84	Female	0.889883
0	84	Male	0.90458
0	85	Female	0.888877
0	85	Male	0.90368
0	86	Female	0.887864
0	86	Male	0.902772
0	87	Female	0.886845
0	87	Male	0.901856
0	88	Female	0.885818
0	88	Male	0.900933
0	89	Female	0.884785
0	89	Male	0.900003
0	90	Female	0.883745
0	90	Male	0.899065
0	91	Female	0.882698
0	91	Male	0.89812
0	92	Female	0.881644
0	92	Male	0.897167
0	93	Female	0.880584
0	93	Male	0.896207
0	94	Female	0.879518
0	94	Male	0.895239
0	95	Female	0.878444
0	95	Male	0.894265
0	96	Female	0.877365
0	96	Male	0.893283
0	97	Female	0.876278
0	97	Male	0.892294
0	98	Female	0.875186
0	98	Male	0.891298
0	99	Female	0.874087
0	99	Male	0.890295
1	18	Female	0.927693
1	18	Male	0.937107
1	19	Female	0.927057
1	19	Male	0.936577
1	20	Female	0.926414
1	20	Male	0.936039
1	21	Female	0.925764
1	21	Male	0.935495
1	22	Female	0.925106
1	22	Male	0.934943
1	23	Female	0.924441
1	23	Male	0.934385
1	24	Female	0.923769
1	24	Male	0.93382
1	25	Female	0.92309
1	25	Male	0.933247
1	26	Female	0.922403
1	26	Male	0.932668
1	27	Female	0.921708
1	27	Male	0.932081
1	28	Female	0.921007
1	28	Male	0.931487
1	29	Female	0.920298
1	29	Male	0.930886
1	30	Female	0.919581
1	30	Male	0.930278
1	31	Female	0.918857
1	31	Male	0.929662
1	32	Female	0.918126
1	32	Male	0.92904
1	33	Female	0.917388
1	33	Male	0.92841
1	34	Female	0.916642
1	34	Male	0.927772
1	35	Female	0.915888
1	35	Male	0.927128
1	36	Female	0.915128
1	36	Male	0.926476
1	37	Female	0.914359
1	37	Male	0.925817
1	38	Female	0.913584
1	38	Male	0.92515
1	39	Female	0.912801
1	39	Male	0.924476
1	40	Female	0.912011
1	40	Male	0.923794
1	41	Female	0.911213
1	41	Male	0.923106
1	42	Female	0.910408
1	42	Male	0.922409
1	43	Female	0.909596
1	43	Male	0.921706
1	44	Female	0.908776
1	44	Male	0.920995
1	45	Female	0.907949
1	45	Male	0.920276
1	46	Female	0.907115
1	46	Male	0.91955
1	47	Female	0.906274
1	47	Male	0.918817
1	48	Female	0.905425
1	48	Male	0.918076
1	49	Female	0.904569
1	49	Male	0.917327
1	50	Female	0.903706
1	50	Male	0.916572
1	51	Female	0.902836
1	51	Male	0.915808
1	52	Female	0.901959
1	52	Male	0.915038
1	53	Female	0.901075
1	53	Male	0.91426
1	54	Female	0.900183
1	54	Male	0.913474
1	55	Female	0.899285
1	55	Male	0.912681
1	56	Female	0.898379
1	56	Male	0.911881
1	57	Female	0.897467
1	57	Male	0.911074
1	58	Female	0.896547
1	58	Male	0.910259
1	59	Female	0.895621
1	59	Male	0.909436
1	60	Female	0.894688
1	60	Male	0.908607
1	61	Female	0.893748
1	61	Male	0.90777
1	62	Female	0.892801
1	62	Male	0.906926
1	63	Female	0.891848
1	63	Male	0.906074
1	64	Female	0.890887
1	64	Male	0.905215
1	65	Female	0.88992
1	65	Male	0.90435
1	66	Female	0.888947
1	66	Male	0.903476
1	67	Female	0.887967
1	67	Male	0.902596
1	68	Female	0.88698
1	68	Male	0.901709
1	69	Female	0.885987
1	69	Male	0.900814
1	70	Female	0.884988
1	70	Male	0.899913
1	71	Female	0.883982
1	71	Male	0.899004
1	72	Female	0.88297
1	72	Male	0.898089
1	73	Female	0.881952
1	73	Male	0.897166
1	74	Female	0.880927
1	74	Male	0.896237
1	75	Female	0.879896
1	75	Male	0.895301
1	76	Female	0.878859
1	76	Male	0.894358
1	77	Female	0.877817
1	77	Male	0.893408
1	78	Female	0.876768
1	78	Male	0.892451
1	79	Female	0.875713
1	79	Male	0.891488
1	80	Female	0.874652
1	80	Male	0.890517
1	81	Female	0.873586
1	81	Male	0.889541
1	82	Female	0.872513
1	82	Male	0.888558
1	83	Female	0.871435
1	83	Male	0.887568
1	84	Female	0.870352
1	84	Male	0.886572
1	85	Female	0.869262
1	85	Male	0.885569
1	86	Female	0.868168
1	86	Male	0.88456
1	87	Female	0.867068
1	87	Male	0.883545
1	88	Female	0.865962
1	88	Male	0.882523
1	89	Female	0.864851
1	89	Male	0.881495
1	90	Female	0.863735
1	90	Male	0.880461
1	91	Female	0.862614
1	91	Male	0.879421
1	92	Female	0.861487
1	92	Male	0.878375
1	93	Female	0.860356
1	93	Male	0.877323
1	94	Female	0.859219
1	94	Male	0.876265
1	95	Female	0.858078
1	95	Male	0.875201
1	96	Female	0.856931
1	96	Male	0.874131
1	97	Female	0.85578
1	97	Male	0.873056
1	98	Female	0.854624
1	98	Male	0.871975
1	99	Female	0.853464
1	99	Male	0.870888
2	18	Female	0.914053
2	18	Male	0.925383
2	19	Female	0.913297
2	19	Male	0.924732
2	20	Female	0.912535
2	20	Male	0.924075
2	21	Female	0.911765
2	21	Male	0.92341
2	22	Female	0.910989
2	22	Male	0.922738
2	23	Female	0.910205
2	23	Male	0.92206
2	24	Female	0.909415
2	24	Male	0.921374
2	25	Female	0.908617
2	25	Male	0.920681
2	26	Female	0.907813
2	26	Male	0.919981
2	27	Female	0.907002
2	27	Male	0.919274
2	28	Female	0.906184
2	28	Male	0.91856
2	29	Female	0.90536
2	29	Male	0.917839
2	30	Female	0.904528
2	30	Male	0.917111
2	31	Female	0.90369
2	31	Male	0.916376
2	32	Female	0.902845
2	32	Male	0.915634
2	33	Female	0.901993
2	33	Male	0.914884
2	34	Female	0.901135
2	34	Male	0.914128
2	35	Female	0.90027
2	35	Male	0.913365
2	36	Female	0.899398
2	36	Male	0.912595
2	37	Female	0.89852
2	37	Male	0.911817
2	38	Female	0.897635
2	38	Male	0.911033
2	39	Female	0.896743
2	39	Male	0.910242
2	40	Female	0.895846
2	40	Male	0.909444
2	41	Female	0.894941
2	41	Male	0.908639
2	42	Female	0.89403
2	42	Male	0.907827
2	43	Female	0.893113
2	43	Male	0.907008
2	44	Female	0.89219
2	44	Male	0.906182
2	45	Female	0.89126
2	45	Male	0.90535
2	46	Female	0.890324
2	46	Male	0.90451
2	47	Female	0.889382
2	47	Male	0.903664
2	48	Female	0.888434
2	48	Male	0.902811
2	49	Female	0.887479
2	49	Male	0.901951
2	50	Female	0.886519
2	50	Male	0.901085
2	51	Female	0.885552
2	51	Male	0.900212
2	52	Female	0.88458
2	52	Male	0.899333
2	53	Female	0.883601
2	53	Male	0.898446
2	54	Female	0.882617
2	54	Male	0.897554
2	55	Female	0.881627
2	55	Male	0.896654
2	56	Female	0.880631
2	56	Male	0.895749
2	57	Female	0.879629
2	57	Male	0.894836
2	58	Female	0.878622
2	58	Male	0.893918
2	59	Female	0.877609
2	59	Male	0.892993
2	60	Female	0.876591
2	60	Male	0.892062
2	61	Female	0.875567
2	61	Male	0.891124
2	62	Female	0.874538
2	62	Male	0.89018
2	63	Female	0.873503
2	63	Male	0.88923
2	64	Female	0.872463
2	64	Male	0.888274
2	65	Female	0.871418
2	65	Male	0.887312
2	66	Female	0.870367
2	66	Male	0.886344
2	67	Female	0.869311
2	67	Male	0.88537
2	68	Female	0.868251
2	68	Male	0.88439
2	69	Female	0.867185
2	69	Male	0.883404
2	70	Female	0.866114
2	70	Male	0.882412
2	71	Female	0.865038
2	71	Male	0.881414
2	72	Female	0.863958
2	72	Male	0.880411
2	73	Female	0.862873
2	73	Male	0.879402
2	74	Female	0.861783
2	74	Male	0.878387
2	75	Female	0.860688
2	75	Male	0.877367
2	76	Female	0.859589
2	76	Male	0.876342
2	77	Female	0.858485
2	77	Male	0.875311
2	78	Female	0.857377
2	78	Male	0.874274
2	79	Female	0.856264
2	79	Male	0.873232
2	80	Female	0.855147
2	80	Male	0.872185
2	81	Female	0.854025
2	81	Male	0.871133
2	82	Female	0.8529
2	82	Male	0.870075
2	83	Female	0.85177
2	83	Male	0.869013
2	84	Female	0.850636
2	84	Male	0.867945
2	85	Female	0.849498
2	85	Male	0.866872
2	86	Female	0.848357
2	86	Male	0.865795
2	87	Female	0.847211
2	87	Male	0.864713
2	88	Female	0.846061
2	88	Male	0.863626
2	89	Female	0.844908
2	89	Male	0.862534
2	90	Female	0.843751
2	90	Male	0.861437
2	91	Female	0.84259
2	91	Male	0.860336
2	92	Female	0.841425
2	92	Male	0.85923
2	93	Female	0.840257
2	93	Male	0.85812
2	94	Female	0.839086
2	94	Male	0.857006
2	95	Female	0.837911
2	95	Male	0.855887
2	96	Female	0.836733
2	96	Male	0.854764
2	97	Female	0.835551
2	97	Male	0.853636
2	98	Female	0.834367
2	98	Male	0.852505
2	99	Female	0.833179
2	99	Male	0.851369
3	18	Female	0.8991
3	18	Male	0.912214
3	19	Female	0.898242
3	19	Male	0.911453
3	20	Female	0.897378
3	20	Male	0.910685
3	21	Female	0.896507
3	21	Male	0.909911
3	22	Female	0.895631
3	22	Male	0.90913
3	23	Female	0.894748
3	23	Male	0.908342
3	24	Female	0.89386
3	24	Male	0.907548
3	25	Female	0.892965
3	25	Male	0.906748
3	26	Female	0.892065
3	26	Male	0.905941
3	27	Female	0.891158
3	27	Male	0.905128
3	28	Female	0.890246
3	28	Male	0.904308
3	29	Female	0.889328
3	29	Male	0.903482
3	30	Female	0.888405
3	30	Male	0.902649
3	31	Female	0.887476
3	31	Male	0.901811
3	32	Female	0.886541
3	32	Male	0.900966
3	33	Female	0.8856
3	33	Male	0.900114
3	34	Female	0.884654
3	34	Male	0.899257
3	35	Female	0.883702
3	35	Male	0.898393
3	36	Female	0.882745
3	36	Male	0.897523
3	37	Female	0.881783
3	37	Male	0.896647
3	38	Female	0.880815
3	38	Male	0.895765
3	39	Female	0.879842
3	39	Male	0.894877
3	40	Female	0.878863
3	40	Male	0.893983
3	41	Female	0.877879
3	41	Male	0.893083
3	42	Female	0.876891
3	42	Male	0.892177
3	43	Female	0.875897
3	43	Male	0.891265
3	44	Female	0.874898
3	44	Male	0.890347
3	45	Female	0.873894
3	45	Male	0.889424
3	46	Female	0.872885
3	46	Male	0.888495
3	47	Female	0.871872
3	47	Male	0.88756
3	48	Female	0.870853
3	48	Male	0.886619
3	49	Female	0.86983
3	49	Male	0.885673
3	50	Female	0.868802
3	50	Male	0.884722
3	51	Female	0.867769
3	51	Male	0.883765
3	52	Female	0.866732
3	52	Male	0.882802
3	53	Female	0.865691
3	53	Male	0.881834
3	54	Female	0.864644
3	54	Male	0.880861
3	55	Female	0.863594
3	55	Male	0.879882
3	56	Female	0.862539
3	56	Male	0.878899
3	57	Female	0.86148
3	57	Male	0.87791
3	58	Female	0.860416
3	58	Male	0.876916
3	59	Female	0.859349
3	59	Male	0.875917
3	60	Female	0.858277
3	60	Male	0.874913
3	61	Female	0.857201
3	61	Male	0.873903
3	62	Female	0.856121
3	62	Male	0.87289
3	63	Female	0.855038
3	63	Male	0.871871
3	64	Female	0.85395
3	64	Male	0.870847
3	65	Female	0.852859
3	65	Male	0.869819
3	66	Female	0.851763
3	66	Male	0.868786
3	67	Female	0.850665
3	67	Male	0.867748
3	68	Female	0.849562
3	68	Male	0.866706
3	69	Female	0.848456
3	69	Male	0.86566
3	70	Female	0.847346
3	70	Male	0.864609
3	71	Female	0.846233
3	71	Male	0.863553
3	72	Female	0.845117
3	72	Male	0.862494
3	73	Female	0.843997
3	73	Male	0.86143
3	74	Female	0.842874
3	74	Male	0.860362
3	75	Female	0.841747
3	75	Male	0.859289
3	76	Female	0.840618
3	76	Male	0.858213
3	77	Female	0.839485
3	77	Male	0.857133
3	78	Female	0.838349
3	78	Male	0.856048
3	79	Female	0.837211
3	79	Male	0.85496
3	80	Female	0.836069
3	80	Male	0.853868
3	81	Female	0.834924
3	81	Male	0.852773
3	82	Female	0.833777
3	82	Male	0.851673
3	83	Female	0.832627
3	83	Male	0.85057
3	84	Female	0.831474
3	84	Male	0.849463
3	85	Female	0.830318
3	85	Male	0.848353
3	86	Female	0.82916
3	86	Male	0.847239
3	87	Female	0.827999
3	87	Male	0.846122
3	88	Female	0.826836
3	88	Male	0.845002
3	89	Female	0.82567
3	89	Male	0.843878
3	90	Female	0.824502
3	90	Male	0.842751
3	91	Female	0.823331
3	91	Male	0.841621
3	92	Female	0.822158
3	92	Male	0.840487
3	93	Female	0.820983
3	93	Male	0.839351
3	94	Female	0.819806
3	94	Male	0.838211
3	95	Female	0.818626
3	95	Male	0.837069
3	96	Female	0.817445
3	96	Male	0.835924
3	97	Female	0.816261
3	97	Male	0.834776
3	98	Female	0.815075
3	98	Male	0.833625
3	99	Female	0.813888
3	99	Male	0.832471
4	18	Female	0.883407
4	18	Male	0.898053
4	19	Female	0.882471
4	19	Male	0.8972
4	20	Female	0.88153
4	20	Male	0.896341
4	21	Female	0.880584
4	21	Male	0.895477
4	22	Female	0.879633
4	22	Male	0.894607
4	23	Female	0.878678
4	23	Male	0.893731
4	24	Female	0.877717
4	24	Male	0.89285
4	25	Female	0.876752
4	25	Male	0.891963
4	26	Female	0.875782
4	26	Male	0.891071
4	27	Female	0.874808
4	27	Male	0.890174
4	28	Female	0.873829
4	28	Male	0.889271
4	29	Female	0.872845
4	29	Male	0.888362
4	30	Female	0.871857
4	30	Male	0.887449
4	31	Female	0.870865
4	31	Male	0.88653
4	32	Female	0.869868
4	32	Male	0.885606
4	33	Female	0.868867
4	33	Male	0.884677
4	34	Female	0.867861
4	34	Male	0.883743
4	35	Female	0.866852
4	35	Male	0.882804
4	36	Female	0.865838
4	36	Male	0.88186
4	37	Female	0.86482
4	37	Male	0.880911
4	38	Female	0.863798
4	38	Male	0.879957
4	39	Female	0.862773
4	39	Male	0.878998
4	40	Female	0.861743
4	40	Male	0.878034
4	41	Female	0.860709
4	41	Male	0.877066
4	42	Female	0.859672
4	42	Male	0.876093
4	43	Female	0.858631
4	43	Male	0.875115
4	44	Female	0.857586
4	44	Male	0.874133
4	45	Female	0.856538
4	45	Male	0.873146
4	46	Female	0.855486
4	46	Male	0.872155
4	47	Female	0.85443
4	47	Male	0.87116
4	48	Female	0.853371
4	48	Male	0.87016
4	49	Female	0.852309
4	49	Male	0.869156
4	50	Female	0.851243
4	50	Male	0.868147
4	51	Female	0.850174
4	51	Male	0.867135
4	52	Female	0.849102
4	52	Male	0.866118
4	53	Female	0.848027
4	53	Male	0.865097
4	54	Female	0.846948
4	54	Male	0.864073
4	55	Female	0.845867
4	55	Male	0.863044
4	56	Female	0.844782
4	56	Male	0.862012
4	57	Female	0.843695
4	57	Male	0.860975
4	58	Female	0.842604
4	58	Male	0.859935
4	59	Female	0.841511
4	59	Male	0.858891
4	60	Female	0.840415
4	60	Male	0.857844
4	61	Female	0.839316
4	61	Male	0.856792
4	62	Female	0.838214
4	62	Male	0.855738
4	63	Female	0.83711
4	63	Male	0.85468
4	64	Female	0.836003
4	64	Male	0.853618
4	65	Female	0.834894
4	65	Male	0.852553
4	66	Female	0.833782
4	66	Male	0.851485
4	67	Female	0.832667
4	67	Male	0.850413
4	68	Female	0.831551
4	68	Male	0.849338
4	69	Female	0.830432
4	69	Male	0.84826
4	70	Female	0.82931
4	70	Male	0.847179
4	71	Female	0.828187
4	71	Male	0.846095
4	72	Female	0.827061
4	72	Male	0.845008
4	73	Female	0.825933
4	73	Male	0.843918
4	74	Female	0.824803
4	74	Male	0.842825
4	75	Female	0.823671
4	75	Male	0.84173
4	76	Female	0.822537
4	76	Male	0.840631
4	77	Female	0.821401
4	77	Male	0.83953
4	78	Female	0.820263
4	78	Male	0.838426
4	79	Female	0.819123
4	79	Male	0.83732
4	80	Female	0.817981
4	80	Male	0.836211
4	81	Female	0.816838
4	81	Male	0.835099
4	82	Female	0.815692
4	82	Male	0.833985
4	83	Female	0.814545
4	83	Male	0.832869
4	84	Female	0.813397
4	84	Male	0.83175
4	85	Female	0.812247
4	85	Male	0.830629
4	86	Female	0.811095
4	86	Male	0.829505
4	87	Female	0.809941
4	87	Male	0.82838
4	88	Female	0.808786
4	88	Male	0.827252
4	89	Female	0.80763
4	89	Male	0.826122
4	90	Female	0.806472
4	90	Male	0.82499
4	91	Female	0.805313
4	91	Male	0.823856
4	92	Female	0.804153
4	92	Male	0.82272
4	93	Female	0.802991
4	93	Male	0.821582
4	94	Female	0.801828
4	94	Male	0.820443
4	95	Female	0.800663
4	95	Male	0.819301
4	96	Female	0.799498
4	96	Male	0.818157
4	97	Female	0.798331
4	97	Male	0.817012
4	98	Female	0.797163
4	98	Male	0.815865
4	99	Female	0.795994
4	99	Male	0.814717
5	18	Female	0.867572
5	18	Male	0.883443
5	19	Female	0.866585
5	19	Male	0.882522
5	20	Female	0.865594
5	20	Male	0.881597
5	21	Female	0.864599
5	21	Male	0.880666
5	22	Female	0.8636
5	22	Male	0.879732
5	23	Female	0.862598
5	23	Male	0.878792
5	24	Female	0.861593
5	24	Male	0.877849
5	25	Female	0.860584
5	25	Male	0.876901
5	26	Female	0.859571
5	26	Male	0.875949
5	27	Female	0.858555
5	27	Male	0.874992
5	28	Female	0.857536
5	28	Male	0.874032
5	29	Female	0.856513
5	29	Male	0.873067
5	30	Female	0.855488
5	30	Male	0.872098
5	31	Female	0.854459
5	31	Male	0.871125
5	32	Female	0.853427
5	32	Male	0.870149
5	33	Female	0.852392
5	33	Male	0.869168
5	34	Female	0.851354
5	34	Male	0.868183
5	35	Female	0.850313
5	35	Male	0.867195
5	36	Female	0.849269
5	36	Male	0.866203
5	37	Female	0.848223
5	37	Male	0.865207
5	38	Female	0.847173
5	38	Male	0.864208
5	39	Female	0.846121
5	39	Male	0.863205
5	40	Female	0.845066
5	40	Male	0.862198
5	41	Female	0.844008
5	41	Male	0.861188
5	42	Female	0.842948
5	42	Male	0.860175
5	43	Female	0.841886
5	43	Male	0.859158
5	44	Female	0.84082
5	44	Male	0.858138
5	45	Female	0.839753
5	45	Male	0.857114
5	46	Female	0.838683
5	46	Male	0.856087
5	47	Female	0.83761
5	47	Male	0.855058
5	48	Female	0.836536
5	48	Male	0.854025
5	49	Female	0.835459
5	49	Male	0.852989
5	50	Female	0.83438
5	50	Male	0.85195
5	51	Female	0.833298
5	51	Male	0.850908
5	52	Female	0.832215
5	52	Male	0.849863
5	53	Female	0.83113
5	53	Male	0.848816
5	54	Female	0.830042
5	54	Male	0.847765
5	55	Female	0.828953
5	55	Male	0.846712
5	56	Female	0.827861
5	56	Male	0.845656
5	57	Female	0.826768
5	57	Male	0.844598
5	58	Female	0.825673
5	58	Male	0.843537
5	59	Female	0.824576
5	59	Male	0.842473
5	60	Female	0.823477
5	60	Male	0.841407
5	61	Female	0.822377
5	61	Male	0.840339
5	62	Female	0.821275
5	62	Male	0.839268
5	63	Female	0.820171
5	63	Male	0.838195
5	64	Female	0.819066
5	64	Male	0.837119
5	65	Female	0.817959
5	65	Male	0.836042
5	66	Female	0.816851
5	66	Male	0.834962
5	67	Female	0.815741
5	67	Male	0.833879
5	68	Female	0.814629
5	68	Male	0.832795
5	69	Female	0.813517
5	69	Male	0.831709
5	70	Female	0.812403
5	70	Male	0.830621
5	71	Female	0.811287
5	71	Male	0.829531
5	72	Female	0.81017
5	72	Male	0.828438
5	73	Female	0.809052
5	73	Male	0.827344
5	74	Female	0.807933
5	74	Male	0.826248
5	75	Female	0.806813
5	75	Male	0.825151
5	76	Female	0.805691
5	76	Male	0.824051
5	77	Female	0.804568
5	77	Male	0.82295
5	78	Female	0.803444
5	78	Male	0.821847
5	79	Female	0.802319
5	79	Male	0.820743
5	80	Female	0.801193
5	80	Male	0.819637
5	81	Female	0.800066
5	81	Male	0.818529
5	82	Female	0.798938
5	82	Male	0.81742
5	83	Female	0.797809
5	83	Male	0.81631
5	84	Female	0.79668
5	84	Male	0.815198
5	85	Female	0.795549
5	85	Male	0.814084
5	86	Female	0.794417
5	86	Male	0.81297
5	87	Female	0.793285
5	87	Male	0.811853
5	88	Female	0.792151
5	88	Male	0.810736
5	89	Female	0.791017
5	89	Male	0.809617
5	90	Female	0.789882
5	90	Male	0.808497
5	91	Female	0.788747
5	91	Male	0.807376
5	92	Female	0.78761
5	92	Male	0.806254
5	93	Female	0.786473
5	93	Male	0.805131
5	94	Female	0.785335
5	94	Male	0.804006
5	95	Female	0.784197
5	95	Male	0.802881
5	96	Female	0.783058
5	96	Male	0.801754
5	97	Female	0.781918
5	97	Male	0.800627
5	98	Female	0.780778
5	98	Male	0.799498
5	99	Female	0.779637
5	99	Male	0.798368
6	18	Female	0.852091
6	18	Male	0.868897
6	19	Female	0.851076
6	19	Male	0.867931
6	20	Female	0.850057
6	20	Male	0.866962
6	21	Female	0.849037
6	21	Male	0.86599
6	22	Female	0.848013
6	22	Male	0.865014
6	23	Female	0.846988
6	23	Male	0.864035
6	24	Female	0.845959
6	24	Male	0.863052
6	25	Female	0.844929
6	25	Male	0.862066
6	26	Female	0.843896
6	26	Male	0.861078
6	27	Female	0.842861
6	27	Male	0.860086
6	28	Female	0.841823
6	28	Male	0.859091
6	29	Female	0.840784
6	29	Male	0.858093
6	30	Female	0.839742
6	30	Male	0.857092
6	31	Female	0.838698
6	31	Male	0.856088
6	32	Female	0.837652
6	32	Male	0.855082
6	33	Female	0.836604
6	33	Male	0.854072
6	34	Female	0.835554
6	34	Male	0.85306
6	35	Female	0.834502
6	35	Male	0.852045
6	36	Female	0.833448
6	36	Male	0.851028
6	37	Female	0.832393
6	37	Male	0.850008
6	38	Female	0.831335
6	38	Male	0.848985
6	39	Female	0.830276
6	39	Male	0.84796
6	40	Female	0.829215
6	40	Male	0.846932
6	41	Female	0.828153
6	41	Male	0.845902
6	42	Female	0.827088
6	42	Male	0.84487
6	43	Female	0.826022
6	43	Male	0.843836
6	44	Female	0.824955
6	44	Male	0.842799
6	45	Female	0.823886
6	45	Male	0.84176
6	46	Female	0.822816
6	46	Male	0.840718
6	47	Female	0.821744
6	47	Male	0.839675
6	48	Female	0.82067
6	48	Male	0.83863
6	49	Female	0.819596
6	49	Male	0.837582
6	50	Female	0.81852
6	50	Male	0.836533
6	51	Female	0.817442
6	51	Male	0.835481
6	52	Female	0.816364
6	52	Male	0.834428
6	53	Female	0.815284
6	53	Male	0.833373
6	54	Female	0.814203
6	54	Male	0.832316
6	55	Female	0.813121
6	55	Male	0.831257
6	56	Female	0.812037
6	56	Male	0.830196
6	57	Female	0.810953
6	57	Male	0.829134
6	58	Female	0.809867
6	58	Male	0.82807
6	59	Female	0.80878
6	59	Male	0.827005
6	60	Female	0.807693
6	60	Male	0.825938
6	61	Female	0.806604
6	61	Male	0.824869
6	62	Female	0.805514
6	62	Male	0.823799
6	63	Female	0.804424
6	63	Male	0.822727
6	64	Female	0.803332
6	64	Male	0.821654
6	65	Female	0.80224
6	65	Male	0.82058
6	66	Female	0.801146
6	66	Male	0.819504
6	67	Female	0.800052
6	67	Male	0.818427
6	68	Female	0.798957
6	68	Male	0.817349
6	69	Female	0.797862
6	69	Male	0.816269
6	70	Female	0.796765
6	70	Male	0.815188
6	71	Female	0.795668
6	71	Male	0.814106
6	72	Female	0.79457
6	72	Male	0.813023
6	73	Female	0.793471
6	73	Male	0.811938
6	74	Female	0.792372
6	74	Male	0.810853
6	75	Female	0.791272
6	75	Male	0.809766
6	76	Female	0.790171
6	76	Male	0.808679
6	77	Female	0.78907
6	77	Male	0.80759
6	78	Female	0.787969
6	78	Male	0.806501
6	79	Female	0.786866
6	79	Male	0.80541
6	80	Female	0.785763
6	80	Male	0.804319
6	81	Female	0.78466
6	81	Male	0.803226
6	82	Female	0.783556
6	82	Male	0.802133
6	83	Female	0.782452
6	83	Male	0.801039
6	84	Female	0.781347
6	84	Male	0.799944
6	85	Female	0.780241
6	85	Male	0.798849
6	86	Female	0.779136
6	86	Male	0.797752
6	87	Female	0.778029
6	87	Male	0.796655
6	88	Female	0.776923
6	88	Male	0.795557
6	89	Female	0.775816
6	89	Male	0.794459
6	90	Female	0.774708
6	90	Male	0.793359
6	91	Female	0.7736
6	91	Male	0.792259
6	92	Female	0.772492
6	92	Male	0.791159
6	93	Female	0.771384
6	93	Male	0.790058
6	94	Female	0.770275
6	94	Male	0.788956
6	95	Female	0.769166
6	95	Male	0.787853
6	96	Female	0.768056
6	96	Male	0.786751
6	97	Female	0.766947
6	97	Male	0.785647
6	98	Female	0.765837
6	98	Male	0.784543
6	99	Female	0.764727
6	99	Male	0.783439
7	18	Female	0.837272
7	18	Male	0.854786
7	19	Female	0.836245
7	19	Male	0.853795
7	20	Female	0.835216
7	20	Male	0.852802
7	21	Female	0.834186
7	21	Male	0.851806
7	22	Female	0.833154
7	22	Male	0.850807
7	23	Female	0.832121
7	23	Male	0.849807
7	24	Female	0.831086
7	24	Male	0.848804
7	25	Female	0.830049
7	25	Male	0.847799
7	26	Female	0.829011
7	26	Male	0.846791
7	27	Female	0.827971
7	27	Male	0.845782
7	28	Female	0.82693
7	28	Male	0.84477
7	29	Female	0.825888
7	29	Male	0.843757
7	30	Female	0.824844
7	30	Male	0.842741
7	31	Female	0.823799
7	31	Male	0.841723
7	32	Female	0.822753
7	32	Male	0.840704
7	33	Female	0.821705
7	33	Male	0.839683
7	34	Female	0.820657
7	34	Male	0.838659
7	35	Female	0.819606
7	35	Male	0.837634
7	36	Female	0.818555
7	36	Male	0.836607
7	37	Female	0.817503
7	37	Male	0.835579
7	38	Female	0.81645
7	38	Male	0.834549
7	39	Female	0.815395
7	39	Male	0.833517
7	40	Female	0.81434
7	40	Male	0.832483
7	41	Female	0.813283
7	41	Male	0.831448
7	42	Female	0.812226
7	42	Male	0.830412
7	43	Female	0.811167
7	43	Male	0.829373
7	44	Female	0.810108
7	44	Male	0.828334
7	45	Female	0.809048
7	45	Male	0.827293
7	46	Female	0.807986
7	46	Male	0.826251
7	47	Female	0.806924
7	47	Male	0.825207
7	48	Female	0.805862
7	48	Male	0.824162
7	49	Female	0.804798
7	49	Male	0.823115
7	50	Female	0.803734
7	50	Male	0.822068
7	51	Female	0.802669
7	51	Male	0.821019
7	52	Female	0.801603
7	52	Male	0.819969
7	53	Female	0.800536
7	53	Male	0.818918
7	54	Female	0.799469
7	54	Male	0.817865
7	55	Female	0.798401
7	55	Male	0.816812
7	56	Female	0.797332
7	56	Male	0.815758
7	57	Female	0.796263
7	57	Male	0.814702
7	58	Female	0.795194
7	58	Male	0.813646
7	59	Female	0.794123
7	59	Male	0.812588
7	60	Female	0.793052
7	60	Male	0.81153
7	61	Female	0.791981
7	61	Male	0.81047
7	62	Female	0.790909
7	62	Male	0.80941
7	63	Female	0.789836
7	63	Male	0.808349
7	64	Female	0.788764
7	64	Male	0.807287
7	65	Female	0.78769
7	65	Male	0.806224
7	66	Female	0.786616
7	66	Male	0.80516
7	67	Female	0.785542
7	67	Male	0.804096
7	68	Female	0.784467
7	68	Male	0.803031
7	69	Female	0.783392
7	69	Male	0.801965
7	70	Female	0.782317
7	70	Male	0.800898
7	71	Female	0.781241
7	71	Male	0.799831
7	72	Female	0.780164
7	72	Male	0.798763
7	73	Female	0.779088
7	73	Male	0.797694
7	74	Female	0.778011
7	74	Male	0.796625
7	75	Female	0.776934
7	75	Male	0.795555
7	76	Female	0.775856
7	76	Male	0.794485
7	77	Female	0.774778
7	77	Male	0.793414
7	78	Female	0.7737
7	78	Male	0.792342
7	79	Female	0.772621
7	79	Male	0.79127
7	80	Female	0.771543
7	80	Male	0.790198
7	81	Female	0.770464
7	81	Male	0.789125
7	82	Female	0.769385
7	82	Male	0.788051
7	83	Female	0.768305
7	83	Male	0.786977
7	84	Female	0.767225
7	84	Male	0.785903
7	85	Female	0.766146
7	85	Male	0.784828
7	86	Female	0.765066
7	86	Male	0.783753
7	87	Female	0.763985
7	87	Male	0.782677
7	88	Female	0.762905
7	88	Male	0.781601
7	89	Female	0.761824
7	89	Male	0.780525
7	90	Female	0.760743
7	90	Male	0.779448
7	91	Female	0.759662
7	91	Male	0.778371
7	92	Female	0.758581
7	92	Male	0.777294
7	93	Female	0.7575
7	93	Male	0.776216
7	94	Female	0.756419
7	94	Male	0.775138
7	95	Female	0.755337
7	95	Male	0.77406
7	96	Female	0.754256
7	96	Male	0.772981
7	97	Female	0.753174
7	97	Male	0.771903
7	98	Female	0.752092
7	98	Male	0.770824
7	99	Female	0.75101
7	99	Male	0.769744
8	18	Female	0.823208
8	18	Male	0.841288
8	19	Female	0.82218
8	19	Male	0.840284
8	20	Female	0.82115
8	20	Male	0.839279
8	21	Female	0.82012
8	21	Male	0.838273
8	22	Female	0.819089
8	22	Male	0.837264
8	23	Female	0.818056
8	23	Male	0.836254
8	24	Female	0.817023
8	24	Male	0.835243
8	25	Female	0.815989
8	25	Male	0.83423
8	26	Female	0.814953
8	26	Male	0.833216
8	27	Female	0.813917
8	27	Male	0.8322
8	28	Female	0.81288
8	28	Male	0.831182
8	29	Female	0.811842
8	29	Male	0.830164
8	30	Female	0.810804
8	30	Male	0.829144
8	31	Female	0.809764
8	31	Male	0.828123
8	32	Female	0.808724
8	32	Male	0.8271
8	33	Female	0.807683
8	33	Male	0.826077
8	34	Female	0.806642
8	34	Male	0.825052
8	35	Female	0.805599
8	35	Male	0.824026
8	36	Female	0.804556
8	36	Male	0.822998
8	37	Female	0.803513
8	37	Male	0.82197
8	38	Female	0.802468
8	38	Male	0.820941
8	39	Female	0.801424
8	39	Male	0.81991
8	40	Female	0.800378
8	40	Male	0.818879
8	41	Female	0.799332
8	41	Male	0.817846
8	42	Female	0.798285
8	42	Male	0.816813
8	43	Female	0.797238
8	43	Male	0.815778
8	44	Female	0.796191
8	44	Male	0.814743
8	45	Female	0.795142
8	45	Male	0.813707
8	46	Female	0.794094
8	46	Male	0.81267
8	47	Female	0.793045
8	47	Male	0.811632
8	48	Female	0.791995
8	48	Male	0.810593
8	49	Female	0.790945
8	49	Male	0.809554
8	50	Female	0.789894
8	50	Male	0.808514
8	51	Female	0.788844
8	51	Male	0.807473
8	52	Female	0.787792
8	52	Male	0.806431
8	53	Female	0.786741
8	53	Male	0.805389
8	54	Female	0.785689
8	54	Male	0.804346
8	55	Female	0.784637
8	55	Male	0.803302
8	56	Female	0.783584
8	56	Male	0.802258
8	57	Female	0.782531
8	57	Male	0.801213
8	58	Female	0.781478
8	58	Male	0.800167
8	59	Female	0.780424
8	59	Male	0.799121
8	60	Female	0.77937
8	60	Male	0.798074
8	61	Female	0.778316
8	61	Male	0.797027
8	62	Female	0.777262
8	62	Male	0.795979
8	63	Female	0.776207
8	63	Male	0.794931
8	64	Female	0.775152
8	64	Male	0.793882
8	65	Female	0.774097
8	65	Male	0.792833
8	66	Female	0.773042
8	66	Male	0.791783
8	67	Female	0.771986
8	67	Male	0.790733
8	68	Female	0.77093
8	68	Male	0.789683
8	69	Female	0.769874
8	69	Male	0.788632
8	70	Female	0.768818
8	70	Male	0.787581
8	71	Female	0.767762
8	71	Male	0.786529
8	72	Female	0.766706
8	72	Male	0.785477
8	73	Female	0.765649
8	73	Male	0.784425
8	74	Female	0.764592
8	74	Male	0.783372
8	75	Female	0.763535
8	75	Male	0.782319
8	76	Female	0.762478
8	76	Male	0.781266
8	77	Female	0.761421
8	77	Male	0.780212
8	78	Female	0.760364
8	78	Male	0.779158
8	79	Female	0.759306
8	79	Male	0.778104
8	80	Female	0.758249
8	80	Male	0.777049
8	81	Female	0.757191
8	81	Male	0.775995
8	82	Female	0.756133
8	82	Male	0.77494
8	83	Female	0.755075
8	83	Male	0.773884
8	84	Female	0.754017
8	84	Male	0.772829
8	85	Female	0.752959
8	85	Male	0.771773
8	86	Female	0.751901
8	86	Male	0.770718
8	87	Female	0.750843
8	87	Male	0.769662
8	88	Female	0.749785
8	88	Male	0.768605
8	89	Female	0.748727
8	89	Male	0.767549
8	90	Female	0.747668
8	90	Male	0.766492
8	91	Female	0.74661
8	91	Male	0.765436
8	92	Female	0.745551
8	92	Male	0.764379
8	93	Female	0.744493
8	93	Male	0.763322
8	94	Female	0.743434
8	94	Male	0.762265
8	95	Female	0.742376
8	95	Male	0.761207
8	96	Female	0.741317
8	96	Male	0.76015
8	97	Female	0.740258
8	97	Male	0.759092
8	98	Female	0.739199
8	98	Male	0.758035
8	99	Female	0.738141
8	99	Male	0.756977
9	18	Female	0.809809
9	18	Male	0.828388
9	19	Female	0.808784
9	19	Male	0.827379
9	20	Female	0.807757
9	20	Male	0.826369
9	21	Female	0.80673
9	21	Male	0.825358
9	22	Female	0.805703
9	22	Male	0.824346
9	23	Female	0.804674
9	23	Male	0.823333
9	24	Female	0.803646
9	24	Male	0.822318
9	25	Female	0.802616
9	25	Male	0.821303
9	26	Female	0.801586
9	26	Male	0.820287
9	27	Female	0.800556
9	27	Male	0.81927
9	28	Female	0.799525
9	28	Male	0.818252
9	29	Female	0.798493
9	29	Male	0.817233
9	30	Female	0.797461
9	30	Male	0.816213
9	31	Female	0.796429
9	31	Male	0.815192
9	32	Female	0.795396
9	32	Male	0.814171
9	33	Female	0.794363
9	33	Male	0.813149
9	34	Female	0.793329
9	34	Male	0.812126
9	35	Female	0.792295
9	35	Male	0.811102
9	36	Female	0.791261
9	36	Male	0.810078
9	37	Female	0.790226
9	37	Male	0.809052
9	38	Female	0.789191
9	38	Male	0.808027
9	39	Female	0.788156
9	39	Male	0.807
9	40	Female	0.78712
9	40	Male	0.805973
9	41	Female	0.786084
9	41	Male	0.804945
9	42	Female	0.785047
9	42	Male	0.803917
9	43	Female	0.784011
9	43	Male	0.802888
9	44	Female	0.782974
9	44	Male	0.801859
9	45	Female	0.781937
9	45	Male	0.800829
9	46	Female	0.780899
9	46	Male	0.799798
9	47	Female	0.779861
9	47	Male	0.798767
9	48	Female	0.778823
9	48	Male	0.797736
9	49	Female	0.777785
9	49	Male	0.796704
9	50	Female	0.776747
9	50	Male	0.795672
9	51	Female	0.775708
9	51	Male	0.794639
9	52	Female	0.774669
9	52	Male	0.793605
9	53	Female	0.77363
9	53	Male	0.792572
9	54	Female	0.772591
9	54	Male	0.791538
9	55	Female	0.771552
9	55	Male	0.790503
9	56	Female	0.770513
9	56	Male	0.789469
9	57	Female	0.769473
9	57	Male	0.788433
9	58	Female	0.768433
9	58	Male	0.787398
9	59	Female	0.767393
9	59	Male	0.786362
9	60	Female	0.766353
9	60	Male	0.785326
9	61	Female	0.765313
9	61	Male	0.78429
9	62	Female	0.764273
9	62	Male	0.783253
9	63	Female	0.763232
9	63	Male	0.782216
9	64	Female	0.762192
9	64	Male	0.781179
9	65	Female	0.761151
9	65	Male	0.780141
9	66	Female	0.76011
9	66	Male	0.779103
9	67	Female	0.75907
9	67	Male	0.778065
9	68	Female	0.758029
9	68	Male	0.777027
9	69	Female	0.756988
9	69	Male	0.775989
9	70	Female	0.755947
9	70	Male	0.77495
9	71	Female	0.754906
9	71	Male	0.773911
9	72	Female	0.753864
9	72	Male	0.772872
9	73	Female	0.752823
9	73	Male	0.771833
9	74	Female	0.751782
9	74	Male	0.770794
9	75	Female	0.750741
9	75	Male	0.769754
9	76	Female	0.749699
9	76	Male	0.768715
9	77	Female	0.748658
9	77	Male	0.767675
9	78	Female	0.747616
9	78	Male	0.766635
9	79	Female	0.746575
9	79	Male	0.765595
9	80	Female	0.745533
9	80	Male	0.764554
9	81	Female	0.744492
9	81	Male	0.763514
9	82	Female	0.74345
9	82	Male	0.762474
9	83	Female	0.742408
9	83	Male	0.761433
9	84	Female	0.741367
9	84	Male	0.760392
9	85	Female	0.740325
9	85	Male	0.759352
9	86	Female	0.739283
9	86	Male	0.758311
9	87	Female	0.738242
9	87	Male	0.75727
9	88	Female	0.7372
9	88	Male	0.756229
9	89	Female	0.736158
9	89	Male	0.755188
9	90	Female	0.735116
9	90	Male	0.754146
9	91	Female	0.734075
9	91	Male	0.753105
9	92	Female	0.733033
9	92	Male	0.752064
9	93	Female	0.731991
9	93	Male	0.751023
9	94	Female	0.730949
9	94	Male	0.749981
9	95	Female	0.729908
9	95	Male	0.74894
9	96	Female	0.728866
9	96	Male	0.747898
9	97	Female	0.727824
9	97	Male	0.746857
9	98	Female	0.726782
9	98	Male	0.745815
9	99	Female	0.725741
9	99	Male	0.744773
10	18	Female	0.796866
10	18	Male	0.81593
10	19	Female	0.795842
10	19	Male	0.814917
10	20	Female	0.794818
10	20	Male	0.813904
10	21	Female	0.793794
10	21	Male	0.81289
10	22	Female	0.792769
10	22	Male	0.811876
10	23	Female	0.791744
10	23	Male	0.81086
10	24	Female	0.790719
10	24	Male	0.809845
10	25	Female	0.789693
10	25	Male	0.808828
10	26	Female	0.788667
10	26	Male	0.807811
10	27	Female	0.787641
10	27	Male	0.806793
10	28	Female	0.786614
10	28	Male	0.805775
10	29	Female	0.785588
10	29	Male	0.804756
10	30	Female	0.784561
10	30	Male	0.803736
10	31	Female	0.783533
10	31	Male	0.802716
10	32	Female	0.782506
10	32	Male	0.801696
10	33	Female	0.781478
10	33	Male	0.800675
10	34	Female	0.78045
10	34	Male	0.799654
10	35	Female	0.779422
10	35	Male	0.798632
10	36	Female	0.778393
10	36	Male	0.797609
10	37	Female	0.777364
10	37	Male	0.796587
10	38	Female	0.776336
10	38	Male	0.795563
10	39	Female	0.775307
10	39	Male	0.79454
10	40	Female	0.774278
10	40	Male	0.793516
10	41	Female	0.773248
10	41	Male	0.792491
10	42	Female	0.772219
10	42	Male	0.791467
10	43	Female	0.771189
10	43	Male	0.790442
10	44	Female	0.770159
10	44	Male	0.789416
10	45	Female	0.76913
10	45	Male	0.788391
10	46	Female	0.7681
10	46	Male	0.787365
10	47	Female	0.767069
10	47	Male	0.786338
10	48	Female	0.766039
10	48	Male	0.785312
10	49	Female	0.765009
10	49	Male	0.784285
10	50	Female	0.763978
10	50	Male	0.783258
10	51	Female	0.762948
10	51	Male	0.78223
10	52	Female	0.761917
10	52	Male	0.781203
10	53	Female	0.760887
10	53	Male	0.780175
10	54	Female	0.759856
10	54	Male	0.779147
10	55	Female	0.758825
10	55	Male	0.778119
10	56	Female	0.757794
10	56	Male	0.77709
10	57	Female	0.756763
10	57	Male	0.776062
10	58	Female	0.755732
10	58	Male	0.775033
10	59	Female	0.754701
10	59	Male	0.774004
10	60	Female	0.75367
10	60	Male	0.772975
10	61	Female	0.752639
10	61	Male	0.771945
10	62	Female	0.751608
10	62	Male	0.770916
10	63	Female	0.750576
10	63	Male	0.769886
10	64	Female	0.749545
10	64	Male	0.768856
10	65	Female	0.748514
10	65	Male	0.767826
10	66	Female	0.747482
10	66	Male	0.766796
10	67	Female	0.746451
10	67	Male	0.765766
10	68	Female	0.74542
10	68	Male	0.764736
10	69	Female	0.744388
10	69	Male	0.763706
10	70	Female	0.743357
10	70	Male	0.762675
10	71	Female	0.742325
10	71	Male	0.761645
10	72	Female	0.741294
10	72	Male	0.760614
10	73	Female	0.740262
10	73	Male	0.759583
10	74	Female	0.739231
10	74	Male	0.758552
10	75	Female	0.7382
10	75	Male	0.757522
10	76	Female	0.737168
10	76	Male	0.756491
10	77	Female	0.736137
10	77	Male	0.75546
10	78	Female	0.735105
10	78	Male	0.754429
10	79	Female	0.734074
10	79	Male	0.753398
10	80	Female	0.733042
10	80	Male	0.752366
10	81	Female	0.732011
10	81	Male	0.751335
10	82	Female	0.730979
10	82	Male	0.750304
10	83	Female	0.729948
10	83	Male	0.749273
10	84	Female	0.728916
10	84	Male	0.748241
10	85	Female	0.727885
10	85	Male	0.74721
10	86	Female	0.726853
10	86	Male	0.746179
10	87	Female	0.725822
10	87	Male	0.745147
10	88	Female	0.724791
10	88	Male	0.744116
10	89	Female	0.723759
10	89	Male	0.743084
10	90	Female	0.722728
10	90	Male	0.742053
10	91	Female	0.721697
10	91	Male	0.741021
10	92	Female	0.720665
10	92	Male	0.73999
10	93	Female	0.719634
10	93	Male	0.738958
10	94	Female	0.718603
10	94	Male	0.737927
10	95	Female	0.717571
10	95	Male	0.736895
10	96	Female	0.71654
10	96	Male	0.735864
10	97	Female	0.715509
10	97	Male	0.734832
10	98	Female	0.714478
10	98	Male	0.733801
10	99	Female	0.713447
10	99	Male	0.732769
11	18	Female	0.784113
11	18	Male	0.803677
11	19	Female	0.783089
11	19	Male	0.80266
11	20	Female	0.782065
11	20	Male	0.801643
11	21	Female	0.781041
11	21	Male	0.800625
11	22	Female	0.780016
11	22	Male	0.799607
11	23	Female	0.778991
11	23	Male	0.798588
11	24	Female	0.777966
11	24	Male	0.797569
11	25	Female	0.776941
11	25	Male	0.79655
11	26	Female	0.775916
11	26	Male	0.79553
11	27	Female	0.774891
11	27	Male	0.79451
11	28	Female	0.773865
11	28	Male	0.793489
11	29	Female	0.77284
11	29	Male	0.792468
11	30	Female	0.771814
11	30	Male	0.791447
11	31	Female	0.770788
11	31	Male	0.790426
11	32	Female	0.769762
11	32	Male	0.789404
11	33	Female	0.768736
11	33	Male	0.788382
11	34	Female	0.767709
11	34	Male	0.787359
11	35	Female	0.766683
11	35	Male	0.786336
11	36	Female	0.765656
11	36	Male	0.785313
11	37	Female	0.76463
11	37	Male	0.78429
11	38	Female	0.763603
11	38	Male	0.783267
11	39	Female	0.762576
11	39	Male	0.782243
11	40	Female	0.76155
11	40	Male	0.781219
11	41	Female	0.760523
11	41	Male	0.780195
11	42	Female	0.759496
11	42	Male	0.77917
11	43	Female	0.758469
11	43	Male	0.778146
11	44	Female	0.757442
11	44	Male	0.777121
11	45	Female	0.756415
11	45	Male	0.776096
11	46	Female	0.755387
11	46	Male	0.775071
11	47	Female	0.75436
11	47	Male	0.774046
11	48	Female	0.753333
11	48	Male	0.77302
11	49	Female	0.752306
11	49	Male	0.771995
11	50	Female	0.751278
11	50	Male	0.770969
11	51	Female	0.750251
11	51	Male	0.769943
11	52	Female	0.749224
11	52	Male	0.768917
11	53	Female	0.748196
11	53	Male	0.767891
11	54	Female	0.747169
11	54	Male	0.766865
11	55	Female	0.746141
11	55	Male	0.765839
11	56	Female	0.745114
11	56	Male	0.764812
11	57	Female	0.744086
11	57	Male	0.763786
11	58	Female	0.743059
11	58	Male	0.762759
11	59	Female	0.742031
11	59	Male	0.761732
11	60	Female	0.741004
11	60	Male	0.760706
11	61	Female	0.739976
11	61	Male	0.759679
11	62	Female	0.738949
11	62	Male	0.758652
11	63	Female	0.737922
11	63	Male	0.757625
11	64	Female	0.736894
11	64	Male	0.756598
11	65	Female	0.735867
11	65	Male	0.755571
11	66	Female	0.734839
11	66	Male	0.754544
11	67	Female	0.733812
11	67	Male	0.753516
11	68	Female	0.732784
11	68	Male	0.752489
11	69	Female	0.731757
11	69	Male	0.751462
11	70	Female	0.730729
11	70	Male	0.750435
11	71	Female	0.729702
11	71	Male	0.749407
11	72	Female	0.728674
11	72	Male	0.74838
11	73	Female	0.727647
11	73	Male	0.747352
11	74	Female	0.72662
11	74	Male	0.746325
11	75	Female	0.725592
11	75	Male	0.745298
11	76	Female	0.724565
11	76	Male	0.74427
11	77	Female	0.723538
11	77	Male	0.743243
11	78	Female	0.72251
11	78	Male	0.742215
11	79	Female	0.721483
11	79	Male	0.741188
11	80	Female	0.720456
11	80	Male	0.74016
11	81	Female	0.719429
11	81	Male	0.739133
11	82	Female	0.718402
11	82	Male	0.738105
11	83	Female	0.717374
11	83	Male	0.737078
11	84	Female	0.716347
11	84	Male	0.73605
11	85	Female	0.71532
11	85	Male	0.735023
11	86	Female	0.714293
11	86	Male	0.733995
11	87	Female	0.713266
11	87	Male	0.732968
11	88	Female	0.712239
11	88	Male	0.73194
11	89	Female	0.711212
11	89	Male	0.730913
11	90	Female	0.710185
11	90	Male	0.729885
11	91	Female	0.709158
11	91	Male	0.728858
11	92	Female	0.708131
11	92	Male	0.727831
11	93	Female	0.707104
11	93	Male	0.726803
11	94	Female	0.706078
11	94	Male	0.725776
11	95	Female	0.705051
11	95	Male	0.724748
11	96	Female	0.704024
11	96	Male	0.723721
11	97	Female	0.702997
11	97	Male	0.722694
11	98	Female	0.701971
11	98	Male	0.721666
11	99	Female	0.700944
11	99	Male	0.720639
12	18	Female	0.771291
12	18	Male	0.791378
12	19	Female	0.770263
12	19	Male	0.790355
12	20	Female	0.769235
12	20	Male	0.789331
12	21	Female	0.768207
12	21	Male	0.788307
12	22	Female	0.767179
12	22	Male	0.787283
12	23	Female	0.766151
12	23	Male	0.786258
12	24	Female	0.765123
12	24	Male	0.785234
12	25	Female	0.764095
12	25	Male	0.784209
12	26	Female	0.763067
12	26	Male	0.783183
12	27	Female	0.762038
12	27	Male	0.782158
12	28	Female	0.76101
12	28	Male	0.781132
12	29	Female	0.759981
12	29	Male	0.780106
12	30	Female	0.758953
12	30	Male	0.77908
12	31	Female	0.757924
12	31	Male	0.778054
12	32	Female	0.756896
12	32	Male	0.777028
12	33	Female	0.755867
[truncated: 99,025 more rows]

## Sheet: G-V
GAD7	age	sex	G-V9
0	18	Female	0.941071
0	18	Male	0.95568
0	19	Female	0.942228
0	19	Male	0.957294
0	20	Female	0.943315
0	20	Male	0.958872
0	21	Female	0.944311
0	21	Male	0.960386
0	22	Female	0.945196
0	22	Male	0.961814
0	23	Female	0.945957
0	23	Male	0.963136
0	24	Female	0.946582
0	24	Male	0.964334
0	25	Female	0.947065
0	25	Male	0.965399
0	26	Female	0.947403
0	26	Male	0.966324
0	27	Female	0.947598
0	27	Male	0.967104
0	28	Female	0.947652
0	28	Male	0.967742
0	29	Female	0.947572
0	29	Male	0.96824
0	30	Female	0.947366
0	30	Male	0.968604
0	31	Female	0.947042
0	31	Male	0.968841
0	32	Female	0.946609
0	32	Male	0.968961
0	33	Female	0.946076
0	33	Male	0.968971
0	34	Female	0.945453
0	34	Male	0.968881
0	35	Female	0.944747
0	35	Male	0.9687
0	36	Female	0.943968
0	36	Male	0.968435
0	37	Female	0.943121
0	37	Male	0.968095
0	38	Female	0.942215
0	38	Male	0.967687
0	39	Female	0.941254
0	39	Male	0.967217
0	40	Female	0.940245
0	40	Male	0.966692
0	41	Female	0.939191
0	41	Male	0.966116
0	42	Female	0.938097
0	42	Male	0.965494
0	43	Female	0.936966
0	43	Male	0.964831
0	44	Female	0.935802
0	44	Male	0.96413
0	45	Female	0.934607
0	45	Male	0.963394
0	46	Female	0.933383
0	46	Male	0.962625
0	47	Female	0.932133
0	47	Male	0.961827
0	48	Female	0.930858
0	48	Male	0.961001
0	49	Female	0.929559
0	49	Male	0.960149
0	50	Female	0.928237
0	50	Male	0.959272
0	51	Female	0.926895
0	51	Male	0.958372
0	52	Female	0.925532
0	52	Male	0.95745
0	53	Female	0.92415
0	53	Male	0.956506
0	54	Female	0.922749
0	54	Male	0.955542
0	55	Female	0.921329
0	55	Male	0.954558
0	56	Female	0.919892
0	56	Male	0.953555
0	57	Female	0.918437
0	57	Male	0.952533
0	58	Female	0.916966
0	58	Male	0.951493
0	59	Female	0.915478
0	59	Male	0.950434
0	60	Female	0.913974
0	60	Male	0.949358
0	61	Female	0.912454
0	61	Male	0.948265
0	62	Female	0.910918
0	62	Male	0.947154
0	63	Female	0.909366
0	63	Male	0.946026
0	64	Female	0.907799
0	64	Male	0.944881
0	65	Female	0.906218
0	65	Male	0.94372
0	66	Female	0.904621
0	66	Male	0.942542
0	67	Female	0.903009
0	67	Male	0.941347
0	68	Female	0.901383
0	68	Male	0.940137
0	69	Female	0.899743
0	69	Male	0.938909
0	70	Female	0.898088
0	70	Male	0.937666
0	71	Female	0.896419
0	71	Male	0.936406
0	72	Female	0.894736
0	72	Male	0.935131
0	73	Female	0.893039
0	73	Male	0.933839
0	74	Female	0.891329
0	74	Male	0.932531
0	75	Female	0.889605
0	75	Male	0.931207
0	76	Female	0.887868
0	76	Male	0.929868
0	77	Female	0.886117
0	77	Male	0.928513
0	78	Female	0.884353
0	78	Male	0.927142
0	79	Female	0.882577
0	79	Male	0.925755
0	80	Female	0.880788
0	80	Male	0.924353
0	81	Female	0.878985
0	81	Male	0.922935
0	82	Female	0.877171
0	82	Male	0.921501
0	83	Female	0.875344
0	83	Male	0.920053
0	84	Female	0.873505
0	84	Male	0.918589
0	85	Female	0.871654
0	85	Male	0.91711
0	86	Female	0.869791
0	86	Male	0.915615
0	87	Female	0.867916
0	87	Male	0.914106
0	88	Female	0.86603
0	88	Male	0.912581
0	89	Female	0.864132
0	89	Male	0.911042
0	90	Female	0.862223
0	90	Male	0.909488
0	91	Female	0.860303
0	91	Male	0.907919
0	92	Female	0.858371
0	92	Male	0.906335
0	93	Female	0.85643
0	93	Male	0.904737
0	94	Female	0.854477
0	94	Male	0.903125
0	95	Female	0.852514
0	95	Male	0.901498
0	96	Female	0.850541
0	96	Male	0.899857
0	97	Female	0.848557
0	97	Male	0.898203
0	98	Female	0.846564
0	98	Male	0.896534
0	99	Female	0.844561
0	99	Male	0.894851
1	18	Female	0.908212
1	18	Male	0.920761
1	19	Female	0.907717
1	19	Male	0.92037
1	20	Female	0.907186
1	20	Male	0.919978
1	21	Female	0.906615
1	21	Male	0.919585
1	22	Female	0.905999
1	22	Male	0.919191
1	23	Female	0.90533
1	23	Male	0.918796
1	24	Female	0.904602
1	24	Male	0.9184
1	25	Female	0.903806
1	25	Male	0.918001
1	26	Female	0.902933
1	26	Male	0.9176
1	27	Female	0.901975
1	27	Male	0.917193
1	28	Female	0.900921
1	28	Male	0.916778
1	29	Female	0.899761
1	29	Male	0.916351
1	30	Female	0.898486
1	30	Male	0.915909
1	31	Female	0.897086
1	31	Male	0.915445
1	32	Female	0.895553
1	32	Male	0.914955
1	33	Female	0.893883
1	33	Male	0.91443
1	34	Female	0.892071
1	34	Male	0.913865
1	35	Female	0.890117
1	35	Male	0.913251
1	36	Female	0.888025
1	36	Male	0.912582
1	37	Female	0.8858
1	37	Male	0.91185
1	38	Female	0.883454
1	38	Male	0.91105
1	39	Female	0.880998
1	39	Male	0.910177
1	40	Female	0.878448
1	40	Male	0.909228
1	41	Female	0.875821
1	41	Male	0.908201
1	42	Female	0.873135
1	42	Male	0.907097
1	43	Female	0.870407
1	43	Male	0.905917
1	44	Female	0.867656
1	44	Male	0.904664
1	45	Female	0.864895
1	45	Male	0.903342
1	46	Female	0.862138
1	46	Male	0.901956
1	47	Female	0.859397
1	47	Male	0.900511
1	48	Female	0.85668
1	48	Male	0.899011
1	49	Female	0.853993
1	49	Male	0.897464
1	50	Female	0.851342
1	50	Male	0.895874
1	51	Female	0.848727
1	51	Male	0.894246
1	52	Female	0.846152
1	52	Male	0.892583
1	53	Female	0.843614
1	53	Male	0.890891
1	54	Female	0.841114
1	54	Male	0.889173
1	55	Female	0.838649
1	55	Male	0.887432
1	56	Female	0.836216
1	56	Male	0.885669
1	57	Female	0.833814
1	57	Male	0.883888
1	58	Female	0.83144
1	58	Male	0.88209
1	59	Female	0.82909
1	59	Male	0.880277
1	60	Female	0.826762
1	60	Male	0.878449
1	61	Female	0.824453
1	61	Male	0.876608
1	62	Female	0.82216
1	62	Male	0.874755
1	63	Female	0.819882
1	63	Male	0.87289
1	64	Female	0.817615
1	64	Male	0.871013
1	65	Female	0.815359
1	65	Male	0.869125
1	66	Female	0.813111
1	66	Male	0.867227
1	67	Female	0.810869
1	67	Male	0.865318
1	68	Female	0.808633
1	68	Male	0.863399
1	69	Female	0.8064
1	69	Male	0.861471
1	70	Female	0.804171
1	70	Male	0.859532
1	71	Female	0.801943
1	71	Male	0.857583
1	72	Female	0.799716
1	72	Male	0.855625
1	73	Female	0.79749
1	73	Male	0.853657
1	74	Female	0.795263
1	74	Male	0.85168
1	75	Female	0.793035
1	75	Male	0.849694
1	76	Female	0.790805
1	76	Male	0.847698
1	77	Female	0.788574
1	77	Male	0.845693
1	78	Female	0.78634
1	78	Male	0.843679
1	79	Female	0.784104
1	79	Male	0.841657
1	80	Female	0.781865
1	80	Male	0.839625
1	81	Female	0.779624
1	81	Male	0.837585
1	82	Female	0.777379
1	82	Male	0.835536
1	83	Female	0.775131
1	83	Male	0.833478
1	84	Female	0.77288
1	84	Male	0.831412
1	85	Female	0.770626
1	85	Male	0.829338
1	86	Female	0.768368
1	86	Male	0.827256
1	87	Female	0.766107
1	87	Male	0.825166
1	88	Female	0.763843
1	88	Male	0.823068
1	89	Female	0.761575
1	89	Male	0.820962
1	90	Female	0.759304
1	90	Male	0.818849
1	91	Female	0.757029
1	91	Male	0.816728
1	92	Female	0.754752
1	92	Male	0.8146
1	93	Female	0.752471
1	93	Male	0.812464
1	94	Female	0.750187
1	94	Male	0.810322
1	95	Female	0.747899
1	95	Male	0.808173
1	96	Female	0.745609
1	96	Male	0.806017
1	97	Female	0.743316
1	97	Male	0.803854
1	98	Female	0.74102
1	98	Male	0.801685
1	99	Female	0.738721
1	99	Male	0.79951
2	18	Female	0.897234
2	18	Male	0.909362
2	19	Female	0.89682
2	19	Male	0.908866
2	20	Female	0.896387
2	20	Male	0.908352
2	21	Female	0.895934
2	21	Male	0.907821
2	22	Female	0.895459
2	22	Male	0.907271
2	23	Female	0.894962
2	23	Male	0.906702
2	24	Female	0.894439
2	24	Male	0.906112
2	25	Female	0.893889
2	25	Male	0.9055
2	26	Female	0.89331
2	26	Male	0.904865
2	27	Female	0.892698
2	27	Male	0.904204
2	28	Female	0.892051
2	28	Male	0.903517
2	29	Female	0.891365
2	29	Male	0.9028
2	30	Female	0.890634
2	30	Male	0.90205
2	31	Female	0.889854
2	31	Male	0.901265
2	32	Female	0.889019
2	32	Male	0.90044
2	33	Female	0.888122
2	33	Male	0.899572
2	34	Female	0.887154
2	34	Male	0.898654
2	35	Female	0.886106
2	35	Male	0.897682
2	36	Female	0.884968
2	36	Male	0.896647
2	37	Female	0.883726
2	37	Male	0.895543
2	38	Female	0.882367
2	38	Male	0.894359
2	39	Female	0.880875
2	39	Male	0.893087
2	40	Female	0.879232
2	40	Male	0.891713
2	41	Female	0.877418
2	41	Male	0.890226
2	42	Female	0.87541
2	42	Male	0.888611
2	43	Female	0.873186
2	43	Male	0.886852
2	44	Female	0.87072
2	44	Male	0.884931
2	45	Female	0.867985
2	45	Male	0.882832
2	46	Female	0.864953
2	46	Male	0.880536
2	47	Female	0.861598
2	47	Male	0.878024
2	48	Female	0.857894
2	48	Male	0.875279
2	49	Female	0.853817
2	49	Male	0.872282
2	50	Female	0.849349
2	50	Male	0.869022
2	51	Female	0.844476
2	51	Male	0.865487
2	52	Female	0.839193
2	52	Male	0.861672
2	53	Female	0.833504
2	53	Male	0.857577
2	54	Female	0.827423
2	54	Male	0.85321
2	55	Female	0.820978
2	55	Male	0.848586
2	56	Female	0.814205
2	56	Male	0.843727
2	57	Female	0.807154
2	57	Male	0.838663
2	58	Female	0.799884
2	58	Male	0.833431
2	59	Female	0.79246
2	59	Male	0.828074
2	60	Female	0.784953
2	60	Male	0.822636
2	61	Female	0.777433
2	61	Male	0.817163
2	62	Female	0.769969
2	62	Male	0.811702
2	63	Female	0.762624
2	63	Male	0.806294
2	64	Female	0.755455
2	64	Male	0.800977
2	65	Female	0.748508
2	65	Male	0.795784
2	66	Female	0.741817
2	66	Male	0.790738
2	67	Female	0.735409
2	67	Male	0.785859
2	68	Female	0.729298
2	68	Male	0.781159
2	69	Female	0.723491
2	69	Male	0.776644
2	70	Female	0.717987
2	70	Male	0.772315
2	71	Female	0.712778
2	71	Male	0.768169
2	72	Female	0.707851
2	72	Male	0.764199
2	73	Female	0.703191
2	73	Male	0.760396
2	74	Female	0.698779
2	74	Male	0.756749
2	75	Female	0.694596
2	75	Male	0.753248
2	76	Female	0.690622
2	76	Male	0.749879
2	77	Female	0.686838
2	77	Male	0.74663
2	78	Female	0.683224
2	78	Male	0.743491
2	79	Female	0.679764
2	79	Male	0.740449
2	80	Female	0.676439
2	80	Male	0.737494
2	81	Female	0.673235
2	81	Male	0.734616
2	82	Female	0.670138
2	82	Male	0.731806
2	83	Female	0.667135
2	83	Male	0.729057
2	84	Female	0.664214
2	84	Male	0.726361
2	85	Female	0.661365
2	85	Male	0.72371
2	86	Female	0.65858
2	86	Male	0.721101
2	87	Female	0.65585
2	87	Male	0.718526
2	88	Female	0.653167
2	88	Male	0.715982
2	89	Female	0.650527
2	89	Male	0.713464
2	90	Female	0.647923
2	90	Male	0.710969
2	91	Female	0.645351
2	91	Male	0.708494
2	92	Female	0.642806
2	92	Male	0.706036
2	93	Female	0.640285
2	93	Male	0.703593
2	94	Female	0.637785
2	94	Male	0.701163
2	95	Female	0.635303
2	95	Male	0.698743
2	96	Female	0.632836
2	96	Male	0.696333
2	97	Female	0.630382
2	97	Male	0.693931
2	98	Female	0.62794
2	98	Male	0.691535
2	99	Female	0.625508
2	99	Male	0.689145
3	18	Female	0.885673
3	18	Male	0.898169
3	19	Female	0.885307
3	19	Male	0.8977
3	20	Female	0.884926
3	20	Male	0.897216
3	21	Female	0.884529
3	21	Male	0.896716
3	22	Female	0.884116
3	22	Male	0.8962
3	23	Female	0.883687
3	23	Male	0.895668
3	24	Female	0.883241
3	24	Male	0.89512
3	25	Female	0.882779
3	25	Male	0.894555
3	26	Female	0.8823
3	26	Male	0.893973
3	27	Female	0.881803
3	27	Male	0.893375
3	28	Female	0.881288
3	28	Male	0.892758
3	29	Female	0.880755
3	29	Male	0.892124
3	30	Female	0.880203
3	30	Male	0.891472
3	31	Female	0.879632
3	31	Male	0.890801
3	32	Female	0.87904
3	32	Male	0.890111
3	33	Female	0.878429
3	33	Male	0.889401
3	34	Female	0.877796
3	34	Male	0.888672
3	35	Female	0.87714
3	35	Male	0.887922
3	36	Female	0.876462
3	36	Male	0.88715
3	37	Female	0.87576
3	37	Male	0.886356
3	38	Female	0.875032
3	38	Male	0.885539
3	39	Female	0.874277
3	39	Male	0.884697
3	40	Female	0.873493
3	40	Male	0.88383
3	41	Female	0.872679
3	41	Male	0.882936
3	42	Female	0.871832
3	42	Male	0.882013
3	43	Female	0.87095
3	43	Male	0.881059
3	44	Female	0.870029
3	44	Male	0.880071
3	45	Female	0.869066
3	45	Male	0.879048
3	46	Female	0.868057
3	46	Male	0.877985
3	47	Female	0.866996
3	47	Male	0.876879
3	48	Female	0.865879
3	48	Male	0.875725
3	49	Female	0.864698
3	49	Male	0.874519
3	50	Female	0.863446
3	50	Male	0.873255
3	51	Female	0.862114
3	51	Male	0.871925
3	52	Female	0.860693
3	52	Male	0.870521
3	53	Female	0.85917
3	53	Male	0.869035
3	54	Female	0.857532
3	54	Male	0.867456
3	55	Female	0.855763
3	55	Male	0.865772
3	56	Female	0.853847
3	56	Male	0.863968
3	57	Female	0.851762
3	57	Male	0.86203
3	58	Female	0.849487
3	58	Male	0.859939
3	59	Female	0.846996
3	59	Male	0.857675
3	60	Female	0.844261
3	60	Male	0.855216
3	61	Female	0.841251
3	61	Male	0.852537
3	62	Female	0.837931
3	62	Male	0.849611
3	63	Female	0.834265
3	63	Male	0.846409
3	64	Female	0.830214
3	64	Male	0.842899
3	65	Female	0.825735
3	65	Male	0.839048
3	66	Female	0.820787
3	66	Male	0.834823
3	67	Female	0.815328
3	67	Male	0.830189
3	68	Female	0.809317
3	68	Male	0.825115
3	69	Female	0.802719
3	69	Male	0.819571
3	70	Female	0.795502
3	70	Male	0.813531
3	71	Female	0.787644
3	71	Male	0.806978
3	72	Female	0.779135
3	72	Male	0.799901
3	73	Female	0.769976
3	73	Male	0.792302
3	74	Female	0.760187
3	74	Male	0.784195
3	75	Female	0.749803
3	75	Male	0.775608
3	76	Female	0.73888
3	76	Male	0.766582
3	77	Female	0.727491
3	77	Male	0.757176
3	78	Female	0.715724
3	78	Male	0.747459
3	79	Female	0.703683
3	79	Male	0.737513
3	80	Female	0.691481
3	80	Male	0.727428
3	81	Female	0.679235
3	81	Male	0.717295
3	82	Female	0.667063
3	82	Male	0.70721
3	83	Female	0.655075
3	83	Male	0.69726
3	84	Female	0.643375
3	84	Male	0.687527
3	85	Female	0.632048
3	85	Male	0.678081
3	86	Female	0.621168
3	86	Male	0.668981
3	87	Female	0.610789
3	87	Male	0.66027
3	88	Female	0.600946
3	88	Male	0.65198
3	89	Female	0.591663
3	89	Male	0.644127
3	90	Female	0.582943
3	90	Male	0.636717
3	91	Female	0.574781
3	91	Male	0.629745
3	92	Female	0.56716
3	92	Male	0.623201
3	93	Female	0.560056
3	93	Male	0.617064
3	94	Female	0.553438
3	94	Male	0.611312
3	95	Female	0.547273
3	95	Male	0.605919
3	96	Female	0.541527
3	96	Male	0.600856
3	97	Female	0.536162
3	97	Male	0.596097
3	98	Female	0.531144
3	98	Male	0.591612
3	99	Female	0.526438
3	99	Male	0.587376
4	18	Female	0.873346
4	18	Male	0.88619
4	19	Female	0.872998
4	19	Male	0.885732
4	20	Female	0.872634
4	20	Male	0.885258
4	21	Female	0.872253
4	21	Male	0.884768
4	22	Female	0.871856
4	22	Male	0.88426
4	23	Female	0.871442
4	23	Male	0.883736
4	24	Female	0.871011
4	24	Male	0.883194
4	25	Female	0.870562
4	25	Male	0.882634
4	26	Female	0.870096
4	26	Male	0.882057
4	27	Female	0.869612
4	27	Male	0.881462
4	28	Female	0.86911
4	28	Male	0.880849
4	29	Female	0.868589
4	29	Male	0.880218
4	30	Female	0.86805
4	30	Male	0.879569
4	31	Female	0.867492
4	31	Male	0.8789
4	32	Female	0.866916
4	32	Male	0.878214
4	33	Female	0.86632
4	33	Male	0.877508
4	34	Female	0.865705
4	34	Male	0.876783
4	35	Female	0.865071
4	35	Male	0.876039
4	36	Female	0.864417
4	36	Male	0.875276
4	37	Female	0.863743
4	37	Male	0.874494
4	38	Female	0.863049
4	38	Male	0.873692
4	39	Female	0.862336
4	39	Male	0.872871
4	40	Female	0.861602
4	40	Male	0.87203
4	41	Female	0.860848
4	41	Male	0.87117
4	42	Female	0.860073
4	42	Male	0.870289
4	43	Female	0.859278
4	43	Male	0.869389
4	44	Female	0.858462
4	44	Male	0.868469
4	45	Female	0.857625
4	45	Male	0.867529
4	46	Female	0.856767
4	46	Male	0.866568
4	47	Female	0.855888
4	47	Male	0.865588
4	48	Female	0.854987
4	48	Male	0.864586
4	49	Female	0.854064
4	49	Male	0.863565
4	50	Female	0.853119
4	50	Male	0.862522
4	51	Female	0.852152
4	51	Male	0.861458
4	52	Female	0.851162
4	52	Male	0.860372
4	53	Female	0.850148
4	53	Male	0.859265
4	54	Female	0.84911
4	54	Male	0.858136
4	55	Female	0.848047
4	55	Male	0.856983
4	56	Female	0.846959
4	56	Male	0.855807
4	57	Female	0.845844
4	57	Male	0.854607
4	58	Female	0.844701
4	58	Male	0.853381
4	59	Female	0.843528
4	59	Male	0.852128
4	60	Female	0.842324
4	60	Male	0.850848
4	61	Female	0.841087
4	61	Male	0.849538
4	62	Female	0.839814
4	62	Male	0.848196
4	63	Female	0.838503
4	63	Male	0.846821
4	64	Female	0.837149
4	64	Male	0.845408
4	65	Female	0.83575
4	65	Male	0.843956
4	66	Female	0.834301
4	66	Male	0.84246
4	67	Female	0.832796
4	67	Male	0.840915
4	68	Female	0.831228
4	68	Male	0.839317
4	69	Female	0.829592
4	69	Male	0.83766
4	70	Female	0.827877
4	70	Male	0.835936
4	71	Female	0.826075
4	71	Male	0.834136
4	72	Female	0.824174
4	72	Male	0.832253
4	73	Female	0.822161
4	73	Male	0.830273
4	74	Female	0.820021
4	74	Male	0.828186
4	75	Female	0.817737
4	75	Male	0.825976
4	76	Female	0.81529
4	76	Male	0.823627
4	77	Female	0.812656
4	77	Male	0.82112
4	78	Female	0.809811
4	78	Male	0.818433
4	79	Female	0.806727
4	79	Male	0.815543
4	80	Female	0.803372
4	80	Male	0.812423
4	81	Female	0.799711
4	81	Male	0.809042
4	82	Female	0.795704
4	82	Male	0.805369
4	83	Female	0.791311
4	83	Male	0.801366
4	84	Female	0.786484
4	84	Male	0.796995
4	85	Female	0.781177
4	85	Male	0.792214
4	86	Female	0.775337
4	86	Male	0.786981
4	87	Female	0.768912
4	87	Male	0.78125
4	88	Female	0.76185
4	88	Male	0.774976
4	89	Female	0.754101
4	89	Male	0.768116
4	90	Female	0.745617
4	90	Male	0.760629
4	91	Female	0.736358
4	91	Male	0.752481
4	92	Female	0.72629
4	92	Male	0.743643
4	93	Female	0.715395
4	93	Male	0.734097
4	94	Female	0.703668
4	94	Male	0.723838
4	95	Female	0.69112
4	95	Male	0.712878
4	96	Female	0.677785
4	96	Male	0.701242
4	97	Female	0.663718
4	97	Male	0.688978
4	98	Female	0.648995
4	98	Male	0.676149
4	99	Female	0.633715
4	99	Male	0.662839
5	18	Female	0.860361
5	18	Male	0.873488
5	19	Female	0.86002
5	19	Male	0.873032
5	20	Female	0.859661
5	20	Male	0.872558
5	21	Female	0.859285
5	21	Male	0.872066
5	22	Female	0.858891
5	22	Male	0.871556
5	23	Female	0.858478
5	23	Male	0.871027
5	24	Female	0.858046
5	24	Male	0.87048
5	25	Female	0.857596
5	25	Male	0.869913
5	26	Female	0.857126
5	26	Male	0.869326
5	27	Female	0.856636
5	27	Male	0.86872
5	28	Female	0.856127
5	28	Male	0.868094
5	29	Female	0.855598
5	29	Male	0.867448
5	30	Female	0.855048
5	30	Male	0.866782
5	31	Female	0.854478
5	31	Male	0.866095
5	32	Female	0.853887
5	32	Male	0.865388
5	33	Female	0.853275
5	33	Male	0.86466
5	34	Female	0.852642
5	34	Male	0.863911
5	35	Female	0.851987
5	35	Male	0.863141
5	36	Female	0.851312
5	36	Male	0.86235
5	37	Female	0.850615
5	37	Male	0.861538
5	38	Female	0.849896
5	38	Male	0.860704
5	39	Female	0.849156
5	39	Male	0.85985
5	40	Female	0.848394
5	40	Male	0.858974
5	41	Female	0.847611
5	41	Male	0.858078
5	42	Female	0.846806
5	42	Male	0.85716
5	43	Female	0.845979
5	43	Male	0.856221
5	44	Female	0.84513
5	44	Male	0.855261
5	45	Female	0.84426
5	45	Male	0.85428
5	46	Female	0.843369
5	46	Male	0.853278
5	47	Female	0.842456
5	47	Male	0.852256
5	48	Female	0.841522
5	48	Male	0.851213
5	49	Female	0.840568
5	49	Male	0.85015
5	50	Female	0.839592
5	50	Male	0.849067
5	51	Female	0.838595
5	51	Male	0.847964
5	52	Female	0.837579
5	52	Male	0.846842
5	53	Female	0.836542
5	53	Male	0.845701
5	54	Female	0.835485
5	54	Male	0.84454
5	55	Female	0.834409
5	55	Male	0.843361
5	56	Female	0.833313
5	56	Male	0.842164
5	57	Female	0.832199
5	57	Male	0.840949
5	58	Female	0.831066
5	58	Male	0.839717
5	59	Female	0.829915
5	59	Male	0.838468
5	60	Female	0.828747
5	60	Male	0.837202
5	61	Female	0.827561
5	61	Male	0.83592
5	62	Female	0.826358
5	62	Male	0.834622
5	63	Female	0.825139
5	63	Male	0.833309
5	64	Female	0.823904
5	64	Male	0.831982
5	65	Female	0.822654
5	65	Male	0.83064
5	66	Female	0.821388
5	66	Male	0.829285
5	67	Female	0.820108
5	67	Male	0.827916
5	68	Female	0.818814
5	68	Male	0.826535
5	69	Female	0.817505
5	69	Male	0.825141
5	70	Female	0.816184
5	70	Male	0.823736
5	71	Female	0.814849
5	71	Male	0.822318
5	72	Female	0.813501
5	72	Male	0.82089
5	73	Female	0.812141
5	73	Male	0.819451
5	74	Female	0.810768
5	74	Male	0.818001
5	75	Female	0.809382
5	75	Male	0.816541
5	76	Female	0.807983
5	76	Male	0.81507
5	77	Female	0.806572
5	77	Male	0.813588
5	78	Female	0.805147
5	78	Male	0.812096
5	79	Female	0.803708
5	79	Male	0.810592
5	80	Female	0.802254
5	80	Male	0.809076
5	81	Female	0.800784
5	81	Male	0.807546
5	82	Female	0.799296
5	82	Male	0.806003
5	83	Female	0.797788
5	83	Male	0.804444
5	84	Female	0.796258
5	84	Male	0.802867
5	85	Female	0.794704
5	85	Male	0.80127
5	86	Female	0.79312
5	86	Male	0.79965
5	87	Female	0.791504
5	87	Male	0.798003
5	88	Female	0.78985
5	88	Male	0.796325
5	89	Female	0.788153
5	89	Male	0.794611
5	90	Female	0.786405
5	90	Male	0.792854
5	91	Female	0.784598
5	91	Male	0.791049
5	92	Female	0.782723
5	92	Male	0.789186
5	93	Female	0.780769
5	93	Male	0.787255
5	94	Female	0.778722
5	94	Male	0.785247
5	95	Female	0.776569
5	95	Male	0.783147
5	96	Female	0.774291
5	96	Male	0.78094
5	97	Female	0.771871
5	97	Male	0.778611
5	98	Female	0.769285
5	98	Male	0.776139
5	99	Female	0.766509
5	99	Male	0.773502
6	18	Female	0.846726
6	18	Male	0.860078
6	19	Female	0.846381
6	19	Male	0.859613
6	20	Female	0.846016
6	20	Male	0.859129
6	21	Female	0.845632
6	21	Male	0.858625
6	22	Female	0.845228
6	22	Male	0.858101
6	23	Female	0.844804
6	23	Male	0.857556
6	24	Female	0.844359
6	24	Male	0.856991
6	25	Female	0.843894
6	25	Male	0.856405
6	26	Female	0.843407
6	26	Male	0.855797
6	27	Female	0.842899
6	27	Male	0.855167
6	28	Female	0.842369
6	28	Male	0.854516
6	29	Female	0.841817
6	29	Male	0.853842
6	30	Female	0.841243
6	30	Male	0.853146
6	31	Female	0.840646
6	31	Male	0.852427
6	32	Female	0.840026
6	32	Male	0.851686
6	33	Female	0.839384
6	33	Male	0.850922
6	34	Female	0.838718
6	34	Male	0.850135
6	35	Female	0.838029
6	35	Male	0.849325
6	36	Female	0.837316
6	36	Male	0.848491
6	37	Female	0.83658
6	37	Male	0.847635
6	38	Female	0.835821
6	38	Male	0.846755
6	39	Female	0.835038
6	39	Male	0.845852
6	40	Female	0.834231
6	40	Male	0.844926
6	41	Female	0.833401
6	41	Male	0.843977
6	42	Female	0.832548
6	42	Male	0.843005
6	43	Female	0.831671
6	43	Male	0.84201
6	44	Female	0.83077
6	44	Male	0.840992
6	45	Female	0.829847
6	45	Male	0.839952
6	46	Female	0.828901
6	46	Male	0.83889
6	47	Female	0.827932
6	47	Male	0.837805
6	48	Female	0.82694
6	48	Male	0.836699
6	49	Female	0.825927
6	49	Male	0.835572
6	50	Female	0.824891
6	50	Male	0.834423
6	51	Female	0.823834
6	51	Male	0.833254
6	52	Female	0.822757
6	52	Male	0.832065
6	53	Female	0.821658
6	53	Male	0.830856
6	54	Female	0.82054
6	54	Male	0.829628
6	55	Female	0.819402
6	55	Male	0.828382
6	56	Female	0.818245
6	56	Male	0.827117
6	57	Female	0.817069
6	57	Male	0.825835
6	58	Female	0.815876
6	58	Male	0.824537
6	59	Female	0.814666
6	59	Male	0.823222
6	60	Female	0.813439
6	60	Male	0.821892
6	61	Female	0.812197
6	61	Male	0.820548
6	62	Female	0.81094
6	62	Male	0.81919
6	63	Female	0.809669
6	63	Male	0.817819
6	64	Female	0.808385
6	64	Male	0.816437
6	65	Female	0.807089
6	65	Male	0.815043
6	66	Female	0.805781
6	66	Male	0.813639
6	67	Female	0.804464
6	67	Male	0.812226
6	68	Female	0.803137
6	68	Male	0.810806
6	69	Female	0.801801
6	69	Male	0.809378
6	70	Female	0.800459
6	70	Male	0.807944
6	71	Female	0.79911
6	71	Male	0.806506
6	72	Female	0.797757
6	72	Male	0.805064
6	73	Female	0.7964
6	73	Male	0.803619
6	74	Female	0.79504
6	74	Male	0.802173
6	75	Female	0.793679
6	75	Male	0.800728
6	76	Female	0.792318
6	76	Male	0.799283
6	77	Female	0.790958
6	77	Male	0.797841
6	78	Female	0.7896
6	78	Male	0.796402
6	79	Female	0.788246
6	79	Male	0.794969
6	80	Female	0.786896
6	80	Male	0.793542
6	81	Female	0.785553
6	81	Male	0.792122
6	82	Female	0.784217
6	82	Male	0.790711
6	83	Female	0.78289
6	83	Male	0.78931
6	84	Female	0.781573
6	84	Male	0.78792
6	85	Female	0.780266
6	85	Male	0.786543
6	86	Female	0.778973
6	86	Male	0.78518
6	87	Female	0.777692
6	87	Male	0.783832
6	88	Female	0.776427
6	88	Male	0.7825
6	89	Female	0.775177
6	89	Male	0.781185
6	90	Female	0.773944
6	90	Male	0.779889
6	91	Female	0.772729
6	91	Male	0.778612
6	92	Female	0.771533
6	92	Male	0.777355
6	93	Female	0.770356
6	93	Male	0.776119
6	94	Female	0.769199
6	94	Male	0.774906
6	95	Female	0.768064
6	95	Male	0.773715
6	96	Female	0.766949
6	96	Male	0.772547
6	97	Female	0.765856
6	97	Male	0.771403
6	98	Female	0.764785
6	98	Male	0.770282
6	99	Female	0.763736
6	99	Male	0.769185
7	18	Female	0.832434
7	18	Male	0.845963
7	19	Female	0.83207
7	19	Male	0.845477
7	20	Female	0.831686
7	20	Male	0.84497
7	21	Female	0.83128
7	21	Male	0.84444
7	22	Female	0.830853
7	22	Male	0.843889
7	23	Female	0.830404
7	23	Male	0.843315
7	24	Female	0.829932
7	24	Male	0.842719
7	25	Female	0.829438
7	25	Male	0.842099
7	26	Female	0.82892
7	26	Male	0.841456
7	27	Female	0.828379
7	27	Male	0.840789
7	28	Female	0.827814
7	28	Male	0.840098
7	29	Female	0.827225
7	29	Male	0.839383
7	30	Female	0.826612
7	30	Male	0.838643
7	31	Female	0.825974
7	31	Male	0.837879
7	32	Female	0.825312
7	32	Male	0.83709
7	33	Female	0.824624
7	33	Male	0.836276
7	34	Female	0.823912
7	34	Male	0.835437
7	35	Female	0.823174
7	35	Male	0.834573
7	36	Female	0.822411
7	36	Male	0.833684
7	37	Female	0.821622
7	37	Male	0.832769
7	38	Female	0.820809
7	38	Male	0.83183
7	39	Female	0.81997
7	39	Male	0.830866
7	40	Female	0.819106
7	40	Male	0.829877
7	41	Female	0.818217
7	41	Male	0.828864
7	42	Female	0.817303
7	42	Male	0.827826
7	43	Female	0.816365
7	43	Male	0.826764
7	44	Female	0.815402
7	44	Male	0.825678
7	45	Female	0.814415
7	45	Male	0.824569
7	46	Female	0.813404
7	46	Male	0.823436
7	47	Female	0.812369
7	47	Male	0.822281
7	48	Female	0.811312
7	48	Male	0.821103
7	49	Female	0.810232
7	49	Male	0.819904
7	50	Female	0.80913
7	50	Male	0.818683
7	51	Female	0.808007
7	51	Male	0.817442
7	52	Female	0.806863
7	52	Male	0.816181
7	53	Female	0.805698
7	53	Male	0.814901
7	54	Female	0.804514
7	54	Male	0.813602
7	55	Female	0.803312
7	55	Male	0.812285
7	56	Female	0.802092
7	56	Male	0.810952
7	57	Female	0.800854
7	57	Male	0.809603
7	58	Female	0.799601
7	58	Male	0.808239
7	59	Female	0.798332
7	59	Male	0.80686
7	60	Female	0.797049
7	60	Male	0.805469
7	61	Female	0.795753
7	61	Male	0.804065
7	62	Female	0.794445
7	62	Male	0.802651
7	63	Female	0.793126
7	63	Male	0.801227
7	64	Female	0.791797
7	64	Male	0.799795
7	65	Female	0.790459
7	65	Male	0.798355
7	66	Female	0.789115
7	66	Male	0.796909
7	67	Female	0.787764
7	67	Male	0.795459
7	68	Female	0.786408
7	68	Male	0.794005
7	69	Female	0.785049
7	69	Male	0.792549
7	70	Female	0.783688
7	70	Male	0.791092
7	71	Female	0.782327
7	71	Male	0.789637
7	72	Female	0.780966
7	72	Male	0.788183
7	73	Female	0.779608
7	73	Male	0.786733
7	74	Female	0.778253
7	74	Male	0.785289
7	75	Female	0.776904
7	75	Male	0.783851
7	76	Female	0.775561
7	76	Male	0.782421
7	77	Female	0.774227
7	77	Male	0.781001
7	78	Female	0.772903
7	78	Male	0.779593
7	79	Female	0.77159
7	79	Male	0.778197
7	80	Female	0.770291
7	80	Male	0.776816
7	81	Female	0.769006
7	81	Male	0.775451
7	82	Female	0.767737
7	82	Male	0.774104
7	83	Female	0.766485
7	83	Male	0.772776
7	84	Female	0.765254
7	84	Male	0.771468
7	85	Female	0.764043
7	85	Male	0.770183
7	86	Female	0.762854
7	86	Male	0.768921
7	87	Female	0.761689
7	87	Male	0.767685
7	88	Female	0.76055
7	88	Male	0.766476
7	89	Female	0.759437
7	89	Male	0.765295
7	90	Female	0.758353
7	90	Male	0.764143
7	91	Female	0.757298
7	91	Male	0.763023
7	92	Female	0.756274
7	92	Male	0.761935
7	93	Female	0.755283
7	93	Male	0.76088
7	94	Female	0.754326
7	94	Male	0.759861
7	95	Female	0.753403
7	95	Male	0.758878
7	96	Female	0.752517
7	96	Male	0.757933
7	97	Female	0.751668
7	97	Male	0.757026
7	98	Female	0.750857
7	98	Male	0.756159
7	99	Female	0.750086
7	99	Male	0.755333
8	18	Female	0.817472
8	18	Male	0.831141
8	19	Female	0.817076
8	19	Male	0.830619
8	20	Female	0.816657
8	20	Male	0.830074
8	21	Female	0.816216
8	21	Male	0.829505
8	22	Female	0.81575
8	22	Male	0.828912
8	23	Female	0.815261
8	23	Male	0.828294
8	24	Female	0.814748
8	24	Male	0.827652
8	25	Female	0.814209
8	25	Male	0.826984
8	26	Female	0.813646
8	26	Male	0.826291
8	27	Female	0.813057
8	27	Male	0.825572
8	28	Female	0.812443
8	28	Male	0.824827
8	29	Female	0.811803
8	29	Male	0.824056
8	30	Female	0.811136
8	30	Male	0.823258
8	31	Female	0.810443
8	31	Male	0.822434
8	32	Female	0.809724
8	32	Male	0.821584
8	33	Female	0.808978
8	33	Male	0.820706
8	34	Female	0.808205
8	34	Male	0.819802
8	35	Female	0.807406
8	35	Male	0.818872
8	36	Female	0.80658
8	36	Male	0.817915
8	37	Female	0.805728
8	37	Male	0.816931
8	38	Female	0.804849
8	38	Male	0.815921
8	39	Female	0.803944
8	39	Male	0.814885
8	40	Female	0.803012
8	40	Male	0.813824
8	41	Female	0.802055
8	41	Male	0.812736
8	42	Female	0.801073
8	42	Male	0.811624
8	43	Female	0.800065
8	43	Male	0.810488
8	44	Female	0.799033
8	44	Male	0.809327
8	45	Female	0.797976
8	45	Male	0.808142
8	46	Female	0.796896
8	46	Male	0.806935
8	47	Female	0.795793
8	47	Male	0.805705
8	48	Female	0.794667
8	48	Male	0.804453
8	49	Female	0.79352
8	49	Male	0.803181
8	50	Female	0.792352
8	50	Male	0.801889
8	51	Female	0.791164
8	51	Male	0.800577
8	52	Female	0.789956
8	52	Male	0.799247
8	53	Female	0.788731
8	53	Male	0.7979
8	54	Female	0.787488
8	54	Male	0.796537
8	55	Female	0.786229
8	55	Male	0.795158
8	56	Female	0.784955
8	56	Male	0.793766
8	57	Female	0.783666
8	57	Male	0.79236
8	58	Female	0.782365
8	58	Male	0.790943
8	59	Female	0.781053
8	59	Male	0.789516
8	60	Female	0.779731
8	60	Male	0.78808
8	61	Female	0.778399
8	61	Male	0.786637
8	62	Female	0.777061
8	62	Male	0.785187
8	63	Female	0.775716
8	63	Male	0.783732
8	64	Female	0.774367
8	64	Male	0.782275
8	65	Female	0.773014
8	65	Male	0.780816
8	66	Female	0.771661
8	66	Male	0.779357
8	67	Female	0.770307
8	67	Male	0.777899
8	68	Female	0.768955
8	68	Male	0.776445
8	69	Female	0.767607
8	69	Male	0.774995
8	70	Female	0.766263
8	70	Male	0.773553
8	71	Female	0.764926
8	71	Male	0.772118
8	72	Female	0.763598
8	72	Male	0.770693
8	73	Female	0.76228
8	73	Male	0.76928
8	74	Female	0.760973
8	74	Male	0.76788
8	75	Female	0.75968
8	75	Male	0.766495
8	76	Female	0.758402
8	76	Male	0.765127
8	77	Female	0.757141
8	77	Male	0.763778
8	78	Female	0.755899
8	78	Male	0.762449
8	79	Female	0.754677
8	79	Male	0.761142
8	80	Female	0.753477
8	80	Male	0.759858
8	81	Female	0.752301
8	81	Male	0.758599
8	82	Female	0.75115
8	82	Male	0.757368
8	83	Female	0.750025
8	83	Male	0.756164
8	84	Female	0.74893
8	84	Male	0.754991
8	85	Female	0.747864
8	85	Male	0.75385
8	86	Female	0.74683
8	86	Male	0.752741
8	87	Female	0.745828
8	87	Male	0.751668
8	88	Female	0.744862
8	88	Male	0.75063
8	89	Female	0.743931
8	89	Male	0.749629
8	90	Female	0.743037
8	90	Male	0.748667
8	91	Female	0.742181
8	91	Male	0.747745
8	92	Female	0.741366
8	92	Male	0.746865
8	93	Female	0.740591
8	93	Male	0.746026
8	94	Female	0.739858
8	94	Male	0.745231
8	95	Female	0.739168
8	95	Male	0.744481
8	96	Female	0.738522
8	96	Male	0.743776
8	97	Female	0.737921
8	97	Male	0.743117
8	98	Female	0.737366
8	98	Male	0.742506
8	99	Female	0.736858
8	99	Male	0.741942
9	18	Female	0.801832
9	18	Male	0.815608
9	19	Female	0.801389
9	19	Male	0.815035
9	20	Female	0.800921
9	20	Male	0.814437
9	21	Female	0.800428
9	21	Male	0.813813
9	22	Female	0.79991
9	22	Male	0.813163
9	23	Female	0.799366
9	23	Male	0.812487
9	24	Female	0.798796
9	24	Male	0.811784
9	25	Female	0.7982
9	25	Male	0.811054
9	26	Female	0.797576
9	26	Male	0.810297
9	27	Female	0.796926
9	27	Male	0.809512
9	28	Female	0.796249
9	28	Male	0.808699
9	29	Female	0.795544
9	29	Male	0.807858
9	30	Female	0.794811
9	30	Male	0.80699
9	31	Female	0.794051
9	31	Male	0.806094
9	32	Female	0.793264
9	32	Male	0.805169
9	33	Female	0.792448
9	33	Male	0.804217
9	34	Female	0.791605
9	34	Male	0.803238
9	35	Female	0.790735
9	35	Male	0.802231
9	36	Female	0.789837
9	36	Male	0.801196
9	37	Female	0.788913
9	37	Male	0.800135
9	38	Female	0.787961
9	38	Male	0.799047
9	39	Female	0.786984
9	39	Male	0.797933
9	40	Female	0.78598
9	40	Male	0.796793
9	41	Female	0.784951
9	41	Male	0.795628
9	42	Female	0.783897
9	42	Male	0.794439
9	43	Female	0.782819
9	43	Male	0.793226
9	44	Female	0.781717
9	44	Male	0.791989
9	45	Female	0.780592
9	45	Male	0.790731
9	46	Female	0.779446
9	46	Male	0.789451
9	47	Female	0.778278
9	47	Male	0.788151
9	48	Female	0.777091
9	48	Male	0.786832
9	49	Female	0.775884
9	49	Male	0.785494
9	50	Female	0.774659
9	50	Male	0.784139
9	51	Female	0.773417
9	51	Male	0.782768
9	52	Female	0.77216
9	52	Male	0.781383
9	53	Female	0.770888
9	53	Male	0.779984
9	54	Female	0.769603
9	54	Male	0.778573
9	55	Female	0.768306
9	55	Male	0.777151
9	56	Female	0.766999
9	56	Male	0.775721
9	57	Female	0.765684
9	57	Male	0.774283
9	58	Female	0.764361
9	58	Male	0.772839
9	59	Female	0.763032
9	59	Male	0.771391
9	60	Female	0.7617
9	60	Male	0.76994
9	61	Female	0.760365
9	61	Male	0.768488
9	62	Female	0.75903
9	62	Male	0.767037
9	63	Female	0.757695
9	63	Male	0.765589
9	64	Female	0.756364
9	64	Male	0.764145
9	65	Female	0.755037
9	65	Male	0.762707
9	66	Female	0.753717
9	66	Male	0.761278
9	67	Female	0.752405
9	67	Male	0.759858
9	68	Female	0.751103
9	68	Male	0.75845
9	69	Female	0.749813
9	69	Male	0.757056
9	70	Female	0.748537
9	70	Male	0.755677
9	71	Female	0.747277
9	71	Male	0.754316
9	72	Female	0.746034
9	72	Male	0.752974
9	73	Female	0.744811
9	73	Male	0.751653
9	74	Female	0.743609
9	74	Male	0.750355
9	75	Female	0.74243
9	75	Male	0.749082
9	76	Female	0.741275
9	76	Male	0.747835
9	77	Female	0.740147
9	77	Male	0.746617
9	78	Female	0.739048
9	78	Male	0.745428
9	79	Female	0.737978
9	79	Male	0.744272
9	80	Female	0.736939
9	80	Male	0.743148
9	81	Female	0.735934
9	81	Male	0.74206
9	82	Female	0.734964
9	82	Male	0.741008
9	83	Female	0.734029
9	83	Male	0.739993
9	84	Female	0.733132
9	84	Male	0.739018
9	85	Female	0.732274
9	85	Male	0.738084
9	86	Female	0.731457
9	86	Male	0.737192
9	87	Female	0.730681
9	87	Male	0.736343
9	88	Female	0.729947
9	88	Male	0.735539
9	89	Female	0.729258
9	89	Male	0.73478
9	90	Female	0.728613
9	90	Male	0.734068
9	91	Female	0.728015
9	91	Male	0.733403
9	92	Female	0.727463
9	92	Male	0.732787
9	93	Female	0.726959
9	93	Male	0.73222
9	94	Female	0.726504
9	94	Male	0.731703
9	95	Female	0.726097
9	95	Male	0.731237
9	96	Female	0.725741
9	96	Male	0.730822
9	97	Female	0.725434
9	97	Male	0.730459
9	98	Female	0.725179
9	98	Male	0.730149
9	99	Female	0.724975
9	99	Male	0.729891
10	18	Female	0.785513
10	18	Male	0.799364
10	19	Female	0.785008
10	19	Male	0.798726
10	20	Female	0.784477
10	20	Male	0.798061
10	21	Female	0.78392
10	21	Male	0.797368
10	22	Female	0.783335
10	22	Male	0.796648
10	23	Female	0.782724
10	23	Male	0.7959
10	24	Female	0.782085
10	24	Male	0.795123
10	25	Female	0.781418
10	25	Male	0.794317
10	26	Female	0.780723
10	26	Male	0.793483
10	27	Female	0.78
10	27	Male	0.792621
10	28	Female	0.779249
10	28	Male	0.791729
10	29	Female	0.77847
10	29	Male	0.790809
10	30	Female	0.777663
10	30	Male	0.78986
10	31	Female	0.776827
10	31	Male	0.788883
10	32	Female	0.775964
10	32	Male	0.787877
10	33	Female	0.775073
10	33	Male	0.786844
10	34	Female	0.774154
10	34	Male	0.785783
10	35	Female	0.773208
10	35	Male	0.784694
10	36	Female	0.772236
10	36	Male	0.783579
10	37	Female	0.771237
10	37	Male	0.782437
10	38	Female	0.770213
10	38	Male	0.78127
10	39	Female	0.769163
10	39	Male	0.780079
10	40	Female	0.76809
10	40	Male	0.778863
10	41	Female	0.766993
10	41	Male	0.777624
10	42	Female	0.765873
10	42	Male	0.776363
10	43	Female	0.764732
10	43	Male	0.77508
10	44	Female	0.76357
10	44	Male	0.773778
10	45	Female	0.762388
10	45	Male	0.772456
10	46	Female	0.761189
10	46	Male	0.771117
10	47	Female	0.759971
10	47	Male	0.769762
10	48	Female	0.758739
10	48	Male	0.768391
10	49	Female	0.757491
10	49	Male	0.767007
10	50	Female	0.756231
10	50	Male	0.765611
10	51	Female	0.754959
10	51	Male	0.764204
10	52	Female	0.753677
10	52	Male	0.762788
10	53	Female	0.752387
10	53	Male	0.761366
10	54	Female	0.75109
10	54	Male	0.759937
10	55	Female	0.749788
10	55	Male	0.758505
10	56	Female	0.748483
10	56	Male	0.757072
10	57	Female	0.747176
10	57	Male	0.755638
10	58	Female	0.745871
10	58	Male	0.754206
10	59	Female	0.744567
10	59	Male	0.752779
10	60	Female	0.743268
10	60	Male	0.751357
10	61	Female	0.741975
10	61	Male	0.749943
10	62	Female	0.74069
10	62	Male	0.748539
10	63	Female	0.739416
10	63	Male	0.747146
10	64	Female	0.738154
10	64	Male	0.745768
10	65	Female	0.736905
10	65	Male	0.744405
10	66	Female	0.735673
10	66	Male	0.743061
10	67	Female	0.734459
10	67	Male	0.741736
10	68	Female	0.733265
10	68	Male	0.740433
10	69	Female	0.732093
10	69	Male	0.739154
10	70	Female	0.730945
10	70	Male	0.737901
10	71	Female	0.729823
10	71	Male	0.736676
10	72	Female	0.728728
10	72	Male	0.73548
10	73	Female	0.727662
10	73	Male	0.734315
10	74	Female	0.726628
10	74	Male	0.733184
10	75	Female	0.725627
10	75	Male	0.732087
10	76	Female	0.72466
10	76	Male	0.731027
10	77	Female	0.723729
10	77	Male	0.730005
10	78	Female	0.722837
10	78	Male	0.729023
10	79	Female	0.721983
10	79	Male	0.728082
10	80	Female	0.72117
10	80	Male	0.727184
10	81	Female	0.720399
10	81	Male	0.726329
10	82	Female	0.719671
10	82	Male	0.72552
10	83	Female	0.718987
10	83	Male	0.724757
10	84	Female	0.71835
10	84	Male	0.724042
10	85	Female	0.717759
10	85	Male	0.723375
10	86	Female	0.717215
10	86	Male	0.722758
10	87	Female	0.71672
10	87	Male	0.722191
10	88	Female	0.716274
10	88	Male	0.721675
10	89	Female	0.715879
10	89	Male	0.721211
10	90	Female	0.715534
10	90	Male	0.7208
10	91	Female	0.71524
10	91	Male	0.720442
10	92	Female	0.714998
10	92	Male	0.720137
10	93	Female	0.714809
10	93	Male	0.719886
10	94	Female	0.714672
10	94	Male	0.71969
10	95	Female	0.714587
10	95	Male	0.719548
10	96	Female	0.714556
10	96	Male	0.71946
10	97	Female	0.714578
10	97	Male	0.719428
10	98	Female	0.714653
10	98	Male	0.719449
10	99	Female	0.714781
10	99	Male	0.719526
11	18	Female	0.76853
11	18	Male	0.782424
11	19	Female	0.767952
11	19	Male	0.781708
11	20	Female	0.767347
11	20	Male	0.780964
11	21	Female	0.766714
11	21	Male	0.780191
11	22	Female	0.766053
11	22	Male	0.779389
11	23	Female	0.765364
11	23	Male	0.778558
11	24	Female	0.764647
11	24	Male	0.777698
11	25	Female	0.763902
11	25	Male	0.776808
11	26	Female	0.763128
11	26	Male	0.77589
11	27	Female	0.762326
11	27	Male	0.774942
11	28	Female	0.761496
11	28	Male	0.773966
11	29	Female	0.760638
11	29	Male	0.772961
11	30	Female	0.759753
11	30	Male	0.771928
11	31	Female	0.75884
11	31	Male	0.770867
11	32	Female	0.7579
11	32	Male	0.769779
11	33	Female	0.756934
11	33	Male	0.768664
11	34	Female	0.755941
11	34	Male	0.767523
11	35	Female	0.754924
11	35	Male	0.766356
11	36	Female	0.753882
11	36	Male	0.765165
11	37	Female	0.752817
11	37	Male	0.76395
11	38	Female	0.751728
11	38	Male	0.762713
11	39	Female	0.750618
11	39	Male	0.761454
11	40	Female	0.749488
11	40	Male	0.760174
11	41	Female	0.748337
11	41	Male	0.758875
11	42	Female	0.747169
11	42	Male	0.757559
11	43	Female	0.745983
11	43	Male	0.756226
11	44	Female	0.744782
11	44	Male	0.754878
11	45	Female	0.743567
11	45	Male	0.753517
11	46	Female	0.742339
11	46	Male	0.752143
11	47	Female	0.7411
11	47	Male	0.75076
11	48	Female	0.739852
11	48	Male	0.749368
11	49	Female	0.738597
11	49	Male	0.74797
11	50	Female	0.737335
11	50	Male	0.746568
11	51	Female	0.73607
11	51	Male	0.745162
11	52	Female	0.734803
11	52	Male	0.743756
11	53	Female	0.733536
11	53	Male	0.742351
11	54	Female	0.732271
11	54	Male	0.74095
11	55	Female	0.731009
11	55	Male	0.739554
11	56	Female	0.729754
11	56	Male	0.738166
11	57	Female	0.728507
11	57	Male	0.736787
11	58	Female	0.72727
11	58	Male	0.73542
11	59	Female	0.726046
11	59	Male	0.734067
11	60	Female	0.724835
11	60	Male	0.732731
11	61	Female	0.723641
11	61	Male	0.731413
11	62	Female	0.722466
11	62	Male	0.730115
11	63	Female	0.721312
11	63	Male	0.728839
11	64	Female	0.72018
11	64	Male	0.727589
11	65	Female	0.719072
11	65	Male	0.726365
11	66	Female	0.717991
11	66	Male	0.72517
11	67	Female	0.716939
11	67	Male	0.724005
11	68	Female	0.715918
11	68	Male	0.722873
11	69	Female	0.714928
11	69	Male	0.721775
11	70	Female	0.713973
11	70	Male	0.720714
11	71	Female	0.713054
11	71	Male	0.719691
11	72	Female	0.712172
11	72	Male	0.718708
11	73	Female	0.71133
11	73	Male	0.717765
11	74	Female	0.710528
11	74	Male	0.716866
11	75	Female	0.709768
11	75	Male	0.716011
11	76	Female	0.709051
11	76	Male	0.715202
11	77	Female	0.70838
11	77	Male	0.714439
11	78	Female	0.707754
11	78	Male	0.713725
11	79	Female	0.707175
11	79	Male	0.71306
11	80	Female	0.706645
11	80	Male	0.712446
11	81	Female	0.706164
11	81	Male	0.711882
11	82	Female	0.705732
11	82	Male	0.711371
11	83	Female	0.705352
11	83	Male	0.710912
11	84	Female	0.705022
11	84	Male	0.710508
11	85	Female	0.704745
11	85	Male	0.710157
11	86	Female	0.704521
11	86	Male	0.709861
11	87	Female	0.704349
11	87	Male	0.709619
11	88	Female	0.704231
11	88	Male	0.709433
11	89	Female	0.704166
11	89	Male	0.709303
11	90	Female	0.704156
11	90	Male	0.709228
11	91	Female	0.704199
11	91	Male	0.709209
11	92	Female	0.704296
11	92	Male	0.709246
11	93	Female	0.704447
11	93	Male	0.709339
11	94	Female	0.704651
11	94	Male	0.709487
11	95	Female	0.704909
11	95	Male	0.70969
11	96	Female	0.705221
11	96	Male	0.709948
11	97	Female	0.705585
11	97	Male	0.710261
11	98	Female	0.706002
11	98	Male	0.710628
11	99	Female	0.706471
11	99	Male	0.711048
12	18	Female	0.750922
12	18	Male	0.764821
12	19	Female	0.750263
12	19	Male	0.764019
12	20	Female	0.749576
12	20	Male	0.763187
12	21	Female	0.748861
12	21	Male	0.762327
12	22	Female	0.748119
12	22	Male	0.761437
12	23	Female	0.747349
12	23	Male	0.760519
12	24	Female	0.74655
12	24	Male	0.759571
12	25	Female	0.745725
12	25	Male	0.758595
12	26	Female	0.744872
12	26	Male	0.757591
12	27	Female	0.743992
12	27	Male	0.756559
12	28	Female	0.743085
12	28	Male	0.755499
12	29	Female	0.742152
12	29	Male	0.754412
12	30	Female	0.741193
12	30	Male	0.753299
12	31	Female	0.74021
12	31	Male	0.752161
12	32	Female	0.739202
12	32	Male	0.750998
12	33	Female	0.738171
[truncated: 99,025 more rows]

## Sheet: PG-V
PHQ9	GAD7	PG-V6
0	0	0.942142
0	1	0.935567
0	2	0.928622
0	3	0.921353
0	4	0.913811
0	5	0.906045
0	6	0.898105
0	7	0.890038
0	8	0.881884
0	9	0.873678
0	10	0.865446
0	11	0.857211
0	12	0.848986
0	13	0.84078
0	14	0.832599
0	15	0.824446
0	16	0.816319
0	17	0.808216
0	18	0.800137
0	19	0.792077
0	20	0.784034
0	21	0.776006
1	0	0.934778
1	1	0.92787
1	2	0.920641
1	3	0.913139
1	4	0.905415
1	5	0.897517
1	6	0.889491
1	7	0.881378
1	8	0.873211
1	9	0.865018
1	10	0.85682
1	11	0.848632
1	12	0.840463
1	13	0.832319
1	14	0.824201
1	15	0.816109
1	16	0.808042
1	17	0.799998
1	18	0.791973
1	19	0.783965
1	20	0.775972
1	21	0.767991
2	0	0.927054
2	1	0.919863
2	2	0.9124
2	3	0.904717
2	4	0.89686
2	5	0.888875
2	6	0.880801
2	7	0.872673
2	8	0.864518
2	9	0.856357
2	10	0.848205
2	11	0.840072
2	12	0.831962
2	13	0.823878
2	14	0.815821
2	15	0.807788
2	16	0.799777
2	17	0.791786
2	18	0.783812
2	19	0.775852
2	20	0.767904
2	21	0.759967
3	0	0.91902
3	1	0.911597
3	2	0.903953
3	3	0.896136
3	4	0.88819
3	5	0.880156
3	6	0.872066
3	7	0.863948
3	8	0.855823
3	9	0.847705
3	10	0.839606
3	11	0.83153
3	12	0.823479
3	13	0.815455
3	14	0.807454
3	15	0.799475
3	16	0.791516
3	17	0.783573
3	18	0.775645
3	19	0.767728
3	20	0.759822
3	21	0.751924
4	0	0.910731
4	1	0.903126
4	2	0.895348
4	3	0.887441
4	4	0.879444
4	5	0.871391
4	6	0.863309
4	7	0.855219
4	8	0.847135
4	9	0.839069
4	10	0.831025
4	11	0.823006
4	12	0.815012
4	13	0.807041
4	14	0.799093
4	15	0.791163
4	16	0.78325
4	17	0.775351
4	18	0.767463
4	19	0.759586
4	20	0.751717
4	21	0.743855
5	0	0.90224
5	1	0.894501
5	2	0.886632
5	3	0.878672
5	4	0.870655
5	5	0.862607
5	6	0.85455
5	7	0.846499
5	8	0.838464
5	9	0.83045
5	10	0.822461
5	11	0.814496
5	12	0.806554
5	13	0.798633
5	14	0.790731
5	15	0.782845
5	16	0.774973
5	17	0.767112
5	18	0.759261
5	19	0.751417
5	20	0.743581
5	21	0.73575
6	0	0.893603
6	1	0.885771
6	2	0.877847
6	3	0.869865
6	4	0.861851
6	5	0.853826
6	6	0.845806
6	7	0.8378
6	8	0.829814
6	9	0.821853
6	10	0.813914
6	11	0.805999
6	12	0.798104
6	13	0.790226
6	14	0.782365
6	15	0.774517
6	16	0.766679
6	17	0.758851
6	18	0.751031
6	19	0.743217
6	20	0.735408
6	21	0.727605
7	0	0.884874
7	1	0.876986
7	2	0.869038
7	3	0.861056
7	4	0.853062
7	5	0.845071
7	6	0.837093
7	7	0.829134
7	8	0.821197
7	9	0.813283
7	10	0.80539
7	11	0.797517
7	12	0.789662
7	13	0.781821
7	14	0.773993
7	15	0.766176
7	16	0.758367
7	17	0.750566
7	18	0.74277
7	19	0.73498
7	20	0.727194
7	21	0.719412
8	0	0.876119
8	1	0.868204
8	2	0.860254
8	3	0.852289
8	4	0.844325
8	5	0.836372
8	6	0.828437
8	7	0.820522
8	8	0.812628
8	9	0.804755
8	10	0.796901
8	11	0.789062
8	12	0.781238
8	13	0.773426
8	14	0.765623
8	15	0.757828
8	16	0.750041
8	17	0.742259
8	18	0.734481
8	19	0.726707
8	20	0.718937
8	21	0.711169
9	0	0.867419
9	1	0.859499
9	2	0.851563
9	3	0.843624
9	4	0.835694
9	5	0.827778
9	6	0.819881
9	7	0.812003
9	8	0.804144
9	9	0.796302
9	10	0.788474
9	11	0.780659
9	12	0.772855
9	13	0.76506
9	14	0.757272
9	15	0.74949
9	16	0.741712
9	17	0.733939
9	18	0.726169
9	19	0.718402
9	20	0.710638
9	21	0.702875
10	0	0.858894
10	1	0.850984
10	2	0.843068
10	3	0.835157
10	4	0.827256
10	5	0.819371
10	6	0.811502
10	7	0.803648
10	8	0.795808
10	9	0.787982
10	10	0.780165
10	11	0.772358
10	12	0.764558
10	13	0.756764
10	14	0.748974
10	15	0.741189
10	16	0.733406
10	17	0.725626
10	18	0.717849
10	19	0.710073
10	20	0.702299
10	21	0.694526
11	0	0.850733
11	1	0.842837
11	2	0.834939
11	3	0.827046
11	4	0.819162
11	5	0.811289
11	6	0.803427
11	7	0.795576
11	8	0.787733
11	9	0.779897
11	10	0.772068
11	11	0.764243
11	12	0.756421
11	13	0.748603
11	14	0.740787
11	15	0.732972
11	16	0.725159
11	17	0.717348
11	18	0.709537
11	19	0.701728
11	20	0.693919
11	21	0.686112
12	0	0.843239
12	1	0.835345
12	2	0.827446
12	3	0.819548
12	4	0.811651
12	5	0.803758
12	6	0.795868
12	7	0.787981
12	8	0.780095
12	9	0.772211
12	10	0.764326
12	11	0.756442
12	12	0.748558
12	13	0.740673
12	14	0.732788
12	15	0.724903
12	16	0.717017
12	17	0.709132
12	18	0.701247
12	19	0.693361
12	20	0.685477
12	21	0.677593
13	0	0.836863
13	1	0.828936
13	2	0.820993
13	3	0.81304
13	4	0.805076
13	5	0.797104
13	6	0.789124
13	7	0.781137
13	8	0.773143
13	9	0.765142
13	10	0.757136
13	11	0.749124
13	12	0.741107
13	13	0.733087
13	14	0.725064
13	15	0.717038
13	16	0.70901
13	17	0.700981
13	18	0.692952
13	19	0.684922
13	20	0.676892
13	21	0.668862
14	0	0.832172
14	1	0.82414
14	2	0.816074
14	3	0.807978
14	4	0.799854
14	5	0.791706
14	6	0.783536
14	7	0.775346
14	8	0.767138
14	9	0.758916
14	10	0.750679
14	11	0.742432
14	12	0.734176
14	13	0.725912
14	14	0.717642
14	15	0.709367
14	16	0.70109
14	17	0.69281
14	18	0.684528
14	19	0.676245
14	20	0.667962
14	21	0.65968
15	0	0.829617
15	1	0.821361
15	2	0.813043
15	3	0.80467
15	4	0.796248
15	5	0.787782
15	6	0.779276
15	7	0.770737
15	8	0.762169
15	9	0.753575
15	10	0.744961
15	11	0.73633
15	12	0.727685
15	13	0.719029
15	14	0.710365
15	15	0.701694
15	16	0.693019
15	17	0.68434
15	18	0.67566
15	19	0.666978
15	20	0.658296
15	21	0.649614
16	0	0.828999
16	1	0.820359
16	2	0.811627
16	3	0.802813
16	4	0.793925
16	5	0.784973
16	6	0.775967
16	7	0.766912
16	8	0.757818
16	9	0.74869
16	10	0.739536
16	11	0.730359
16	12	0.721165
16	13	0.711958
16	14	0.702741
16	15	0.693516
16	16	0.684286
16	17	0.675052
16	18	0.665816
16	19	0.65658
16	20	0.647343
16	21	0.638107
17	0	0.828966
17	1	0.819795
17	2	0.810505
17	3	0.801109
17	4	0.791622
17	5	0.782055
17	6	0.772421
17	7	0.76273
17	8	0.752993
17	9	0.743218
17	10	0.733412
17	11	0.723582
17	12	0.713733
17	13	0.70387
17	14	0.693997
17	15	0.684117
17	16	0.674232
17	17	0.664343
17	18	0.654453
17	19	0.644563
17	20	0.634672
17	21	0.624783
18	0	0.827412
18	1	0.817641
18	2	0.807736
18	3	0.797714
18	4	0.787591
18	5	0.777383
18	6	0.767104
18	7	0.756766
18	8	0.746381
18	9	0.735957
18	10	0.725504
18	11	0.715028
18	12	0.704534
18	13	0.694028
18	14	0.683513
18	15	0.672992
18	16	0.662467
18	17	0.651939
18	18	0.641411
18	19	0.630883
18	20	0.620356
18	21	0.609829
19	0	0.82278
19	1	0.812446
19	2	0.801976
19	3	0.791391
19	4	0.780708
19	5	0.769944
19	6	0.759113
19	7	0.748227
19	8	0.737299
19	9	0.726337
19	10	0.71535
19	11	0.704343
19	12	0.693322
19	13	0.682291
19	14	0.671253
19	15	0.660212
19	16	0.649167
19	17	0.638122
19	18	0.627077
19	19	0.616032
19	20	0.604988
19	21	0.593946
20	0	0.81485
20	1	0.804054
20	2	0.793134
20	3	0.78211
20	4	0.770999
20	5	0.759817
20	6	0.748578
20	7	0.737294
20	8	0.725975
20	9	0.714629
20	10	0.703262
20	11	0.691881
20	12	0.68049
20	13	0.669092
20	14	0.65769
20	15	0.646286
20	16	0.63488
20	17	0.623474
20	18	0.612069
20	19	0.600665
20	20	0.589262
20	21	0.57786
21	0	0.804317
21	1	0.793176
21	2	0.781928
21	3	0.770592
21	4	0.759185
21	5	0.747719
21	6	0.736208
21	7	0.724662
21	8	0.713089
21	9	0.701496
21	10	0.689889
21	11	0.678272
21	12	0.666648
21	13	0.655021
21	14	0.643391
21	15	0.63176
21	16	0.620129
21	17	0.608498
21	18	0.596869
21	19	0.58524
21	20	0.573613
21	21	0.561987
22	0	0.792064
22	1	0.780675
22	2	0.7692
22	3	0.757654
22	4	0.746051
22	5	0.734404
22	6	0.722722
22	7	0.711015
22	8	0.699288
22	9	0.687548
22	10	0.675798
22	11	0.664042
22	12	0.652283
22	13	0.640521
22	14	0.628759
22	15	0.616996
22	16	0.605234
22	17	0.593473
22	18	0.581714
22	19	0.569955
22	20	0.558197
22	21	0.54644
23	0	0.778775
23	1	0.767213
23	2	0.755583
23	3	0.743898
23	4	0.732171
23	5	0.72041
23	6	0.708625
23	7	0.696822
23	8	0.685007
23	9	0.673182
23	10	0.661351
23	11	0.649518
23	12	0.637682
23	13	0.625846
23	14	0.61401
23	15	0.602175
23	16	0.590341
23	17	0.578507
23	18	0.566675
23	19	0.554844
23	20	0.543013
23	21	0.531184
24	0	0.764888
24	1	0.753206
24	2	0.741472
24	3	0.729697
24	4	0.717891
24	5	0.706061
24	6	0.694215
24	7	0.682357
24	8	0.67049
24	9	0.658619
24	10	0.646744
24	11	0.634868
24	12	0.622992
24	13	0.611116
24	14	0.599241
24	15	0.587366
24	16	0.575493
24	17	0.56362
24	18	0.551749
24	19	0.539878
24	20	0.528008
24	21	0.516139
25	0	0.750661
25	1	0.738895
25	2	0.727091
25	3	0.715258
25	4	0.703402
25	5	0.691531
25	6	0.679649
25	7	0.66776
25	8	0.655866
25	9	0.643969
25	10	0.632071
25	11	0.620173
25	12	0.608276
25	13	0.596379
25	14	0.584483
25	15	0.572588
25	16	0.560694
25	17	0.548801
25	18	0.536908
25	19	0.525017
25	20	0.513126
25	21	0.501235
26	0	0.736238
26	1	0.724414
26	2	0.712564
26	3	0.700693
26	4	0.688807
26	5	0.676912
26	6	0.665009
26	7	0.653103
26	8	0.641194
26	9	0.629285
26	10	0.617375
26	11	0.605466
26	12	0.593558
26	13	0.58165
26	14	0.569744
26	15	0.557838
26	16	0.545934
26	17	0.53403
26	18	0.522127
26	19	0.510224
26	20	0.498322
26	21	0.48642
27	0	0.721699
27	1	0.709837
27	2	0.697956
27	3	0.686062
27	4	0.674158
27	5	0.662249
27	6	0.650335
27	7	0.63842
27	8	0.626504
27	9	0.614589
27	10	0.602674
27	11	0.590759
27	12	0.578846
27	13	0.566933
27	14	0.555022
27	15	0.543111
27	16	0.531201
27	17	0.519292
27	18	0.507383
27	19	0.495474
27	20	0.483566
27	21	0.471658

## Sheet: C
PHQ9	GAD7	age	sex	C3
0	0	18	Female	0.921042
0	0	18	Male	0.932378
0	0	19	Female	0.920565
0	0	19	Male	0.932192
0	0	20	Female	0.920068
0	0	20	Male	0.931992
0	0	21	Female	0.919552
0	0	21	Male	0.931779
0	0	22	Female	0.919015
0	0	22	Male	0.931552
0	0	23	Female	0.918459
0	0	23	Male	0.93131
0	0	24	Female	0.917881
0	0	24	Male	0.931053
0	0	25	Female	0.917282
0	0	25	Male	0.930781
0	0	26	Female	0.916661
0	0	26	Male	0.930492
0	0	27	Female	0.916017
0	0	27	Male	0.930187
0	0	28	Female	0.915352
0	0	28	Male	0.929866
0	0	29	Female	0.914663
0	0	29	Male	0.929527
0	0	30	Female	0.91395
0	0	30	Male	0.92917
0	0	31	Female	0.913214
0	0	31	Male	0.928795
0	0	32	Female	0.912454
0	0	32	Male	0.928401
0	0	33	Female	0.911669
0	0	33	Male	0.927988
0	0	34	Female	0.910859
0	0	34	Male	0.927555
0	0	35	Female	0.910024
0	0	35	Male	0.927103
0	0	36	Female	0.909163
0	0	36	Male	0.926629
0	0	37	Female	0.908275
0	0	37	Male	0.926135
0	0	38	Female	0.907362
0	0	38	Male	0.925619
0	0	39	Female	0.906421
0	0	39	Male	0.925081
0	0	40	Female	0.905454
0	0	40	Male	0.92452
0	0	41	Female	0.904459
0	0	41	Male	0.923937
0	0	42	Female	0.903436
0	0	42	Male	0.92333
0	0	43	Female	0.902386
0	0	43	Male	0.922699
0	0	44	Female	0.901307
0	0	44	Male	0.922044
0	0	45	Female	0.900199
0	0	45	Male	0.921364
0	0	46	Female	0.899063
0	0	46	Male	0.920659
0	0	47	Female	0.897897
0	0	47	Male	0.919928
0	0	48	Female	0.896702
0	0	48	Male	0.919171
0	0	49	Female	0.895478
0	0	49	Male	0.918388
0	0	50	Female	0.894223
0	0	50	Male	0.917578
0	0	51	Female	0.892939
0	0	51	Male	0.916741
0	0	52	Female	0.891625
0	0	52	Male	0.915875
0	0	53	Female	0.89028
0	0	53	Male	0.914982
0	0	54	Female	0.888904
0	0	54	Male	0.91406
0	0	55	Female	0.887498
0	0	55	Male	0.913109
0	0	56	Female	0.886061
0	0	56	Male	0.912129
0	0	57	Female	0.884593
0	0	57	Male	0.91112
0	0	58	Female	0.883095
0	0	58	Male	0.91008
0	0	59	Female	0.881565
0	0	59	Male	0.90901
0	0	60	Female	0.880003
0	0	60	Male	0.90791
0	0	61	Female	0.878411
0	0	61	Male	0.906779
0	0	62	Female	0.876787
0	0	62	Male	0.905616
0	0	63	Female	0.875132
0	0	63	Male	0.904422
0	0	64	Female	0.873446
0	0	64	Male	0.903196
0	0	65	Female	0.871728
0	0	65	Male	0.901938
0	0	66	Female	0.869979
0	0	66	Male	0.900648
0	0	67	Female	0.868199
0	0	67	Male	0.899325
0	0	68	Female	0.866388
0	0	68	Male	0.89797
0	0	69	Female	0.864545
0	0	69	Male	0.896581
0	0	70	Female	0.862671
0	0	70	Male	0.89516
0	0	71	Female	0.860767
0	0	71	Male	0.893705
0	0	72	Female	0.858831
0	0	72	Male	0.892217
0	0	73	Female	0.856865
0	0	73	Male	0.890695
0	0	74	Female	0.854868
0	0	74	Male	0.889139
0	0	75	Female	0.852841
0	0	75	Male	0.887549
0	0	76	Female	0.850783
0	0	76	Male	0.885926
0	0	77	Female	0.848695
0	0	77	Male	0.884268
0	0	78	Female	0.846578
0	0	78	Male	0.882577
0	0	79	Female	0.84443
0	0	79	Male	0.880851
0	0	80	Female	0.842254
0	0	80	Male	0.879091
0	0	81	Female	0.840047
0	0	81	Male	0.877297
0	0	82	Female	0.837812
0	0	82	Male	0.875468
0	0	83	Female	0.835549
0	0	83	Male	0.873606
0	0	84	Female	0.833256
0	0	84	Male	0.871709
0	0	85	Female	0.830936
0	0	85	Male	0.869778
0	0	86	Female	0.828587
0	0	86	Male	0.867814
0	0	87	Female	0.826211
0	0	87	Male	0.865815
0	0	88	Female	0.823808
0	0	88	Male	0.863783
0	0	89	Female	0.821378
0	0	89	Male	0.861716
0	0	90	Female	0.818921
0	0	90	Male	0.859616
0	0	91	Female	0.816438
0	0	91	Male	0.857483
0	0	92	Female	0.813929
0	0	92	Male	0.855317
0	0	93	Female	0.811394
0	0	93	Male	0.853117
0	0	94	Female	0.808834
0	0	94	Male	0.850884
0	0	95	Female	0.806249
0	0	95	Male	0.848619
0	0	96	Female	0.80364
0	0	96	Male	0.846321
0	0	97	Female	0.801007
0	0	97	Male	0.843991
0	0	98	Female	0.79835
0	0	98	Male	0.841629
0	0	99	Female	0.79567
0	0	99	Male	0.839235
0	1	18	Female	0.906355
0	1	18	Male	0.920575
0	1	19	Female	0.905689
0	1	19	Male	0.92024
0	1	20	Female	0.905002
0	1	20	Male	0.919889
0	1	21	Female	0.904293
0	1	21	Male	0.919522
0	1	22	Female	0.903561
0	1	22	Male	0.919138
0	1	23	Female	0.902807
0	1	23	Male	0.918736
0	1	24	Female	0.90203
0	1	24	Male	0.918316
0	1	25	Female	0.901229
0	1	25	Male	0.917877
0	1	26	Female	0.900404
0	1	26	Male	0.91742
0	1	27	Female	0.899556
0	1	27	Male	0.916944
0	1	28	Female	0.898683
0	1	28	Male	0.916448
0	1	29	Female	0.897785
0	1	29	Male	0.915931
0	1	30	Female	0.896862
0	1	30	Male	0.915394
0	1	31	Female	0.895914
0	1	31	Male	0.914836
0	1	32	Female	0.894939
0	1	32	Male	0.914256
0	1	33	Female	0.893939
0	1	33	Male	0.913654
0	1	34	Female	0.892913
0	1	34	Male	0.913029
0	1	35	Female	0.89186
0	1	35	Male	0.912382
0	1	36	Female	0.89078
0	1	36	Male	0.911711
0	1	37	Female	0.889673
0	1	37	Male	0.911016
0	1	38	Female	0.888539
0	1	38	Male	0.910298
0	1	39	Female	0.887377
0	1	39	Male	0.909554
0	1	40	Female	0.886187
0	1	40	Male	0.908786
0	1	41	Female	0.884969
0	1	41	Male	0.907992
0	1	42	Female	0.883724
0	1	42	Male	0.907172
0	1	43	Female	0.88245
0	1	43	Male	0.906327
0	1	44	Female	0.881147
0	1	44	Male	0.905454
0	1	45	Female	0.879816
0	1	45	Male	0.904554
0	1	46	Female	0.878456
0	1	46	Male	0.903628
0	1	47	Female	0.877067
0	1	47	Male	0.902673
0	1	48	Female	0.875649
0	1	48	Male	0.90169
0	1	49	Female	0.874202
0	1	49	Male	0.900679
0	1	50	Female	0.872725
0	1	50	Male	0.89964
0	1	51	Female	0.87122
0	1	51	Male	0.898571
0	1	52	Female	0.869685
0	1	52	Male	0.897473
0	1	53	Female	0.868121
0	1	53	Male	0.896345
0	1	54	Female	0.866527
0	1	54	Male	0.895187
0	1	55	Female	0.864904
0	1	55	Male	0.893999
0	1	56	Female	0.863252
0	1	56	Male	0.892781
0	1	57	Female	0.86157
0	1	57	Male	0.891532
0	1	58	Female	0.859859
0	1	58	Male	0.890252
0	1	59	Female	0.858119
0	1	59	Male	0.888941
0	1	60	Female	0.85635
0	1	60	Male	0.887599
0	1	61	Female	0.854551
0	1	61	Male	0.886225
0	1	62	Female	0.852723
0	1	62	Male	0.884819
0	1	63	Female	0.850867
0	1	63	Male	0.883382
0	1	64	Female	0.848981
0	1	64	Male	0.881913
0	1	65	Female	0.847067
0	1	65	Male	0.880411
0	1	66	Female	0.845125
0	1	66	Male	0.878878
0	1	67	Female	0.843154
0	1	67	Male	0.877312
0	1	68	Female	0.841155
0	1	68	Male	0.875713
0	1	69	Female	0.839127
0	1	69	Male	0.874083
0	1	70	Female	0.837072
0	1	70	Male	0.872419
0	1	71	Female	0.83499
0	1	71	Male	0.870723
0	1	72	Female	0.83288
0	1	72	Male	0.868995
0	1	73	Female	0.830743
0	1	73	Male	0.867234
0	1	74	Female	0.828579
0	1	74	Male	0.865441
0	1	75	Female	0.826388
0	1	75	Male	0.863614
0	1	76	Female	0.824171
0	1	76	Male	0.861756
0	1	77	Female	0.821928
0	1	77	Male	0.859865
0	1	78	Female	0.819659
0	1	78	Male	0.857942
0	1	79	Female	0.817364
0	1	79	Male	0.855986
0	1	80	Female	0.815045
0	1	80	Male	0.853998
0	1	81	Female	0.8127
0	1	81	Male	0.851979
0	1	82	Female	0.810331
0	1	82	Male	0.849927
0	1	83	Female	0.807937
0	1	83	Male	0.847843
0	1	84	Female	0.80552
0	1	84	Male	0.845728
0	1	85	Female	0.803079
0	1	85	Male	0.843582
0	1	86	Female	0.800614
0	1	86	Male	0.841404
0	1	87	Female	0.798127
0	1	87	Male	0.839195
0	1	88	Female	0.795618
0	1	88	Male	0.836956
0	1	89	Female	0.793086
0	1	89	Male	0.834686
0	1	90	Female	0.790532
0	1	90	Male	0.832385
0	1	91	Female	0.787958
0	1	91	Male	0.830055
0	1	92	Female	0.785362
0	1	92	Male	0.827694
0	1	93	Female	0.782745
0	1	93	Male	0.825304
0	1	94	Female	0.780108
0	1	94	Male	0.822885
0	1	95	Female	0.777452
0	1	95	Male	0.820437
0	1	96	Female	0.774776
0	1	96	Male	0.81796
0	1	97	Female	0.77208
0	1	97	Male	0.815455
0	1	98	Female	0.769367
0	1	98	Male	0.812921
0	1	99	Female	0.766635
0	1	99	Male	0.810361
0	2	18	Female	0.891028
0	2	18	Male	0.908082
0	2	19	Female	0.890177
0	2	19	Male	0.907583
0	2	20	Female	0.889302
0	2	20	Male	0.907066
0	2	21	Female	0.888405
0	2	21	Male	0.90653
0	2	22	Female	0.887484
0	2	22	Male	0.905975
0	2	23	Female	0.88654
0	2	23	Male	0.9054
0	2	24	Female	0.885572
0	2	24	Male	0.904805
0	2	25	Female	0.88458
0	2	25	Male	0.904189
0	2	26	Female	0.883564
0	2	26	Male	0.903553
0	2	27	Female	0.882523
0	2	27	Male	0.902895
0	2	28	Female	0.881457
0	2	28	Male	0.902215
0	2	29	Female	0.880367
0	2	29	Male	0.901513
0	2	30	Female	0.879251
0	2	30	Male	0.900789
0	2	31	Female	0.878109
0	2	31	Male	0.900041
0	2	32	Female	0.876942
0	2	32	Male	0.899271
0	2	33	Female	0.87575
0	2	33	Male	0.898476
0	2	34	Female	0.874531
0	2	34	Male	0.897658
0	2	35	Female	0.873286
0	2	35	Male	0.896814
0	2	36	Female	0.872015
0	2	36	Male	0.895947
0	2	37	Female	0.870717
0	2	37	Male	0.895053
0	2	38	Female	0.869393
0	2	38	Male	0.894135
0	2	39	Female	0.868042
0	2	39	Male	0.89319
0	2	40	Female	0.866665
0	2	40	Male	0.89222
0	2	41	Female	0.86526
0	2	41	Male	0.891222
0	2	42	Female	0.863829
0	2	42	Male	0.890198
0	2	43	Female	0.862371
0	2	43	Male	0.889147
0	2	44	Female	0.860886
0	2	44	Male	0.888069
0	2	45	Female	0.859374
0	2	45	Male	0.886962
0	2	46	Female	0.857835
0	2	46	Male	0.885828
0	2	47	Female	0.856269
0	2	47	Male	0.884666
0	2	48	Female	0.854676
0	2	48	Male	0.883475
0	2	49	Female	0.853056
0	2	49	Male	0.882256
0	2	50	Female	0.851409
0	2	50	Male	0.881008
0	2	51	Female	0.849735
0	2	51	Male	0.87973
0	2	52	Female	0.848034
0	2	52	Male	0.878424
0	2	53	Female	0.846306
0	2	53	Male	0.877088
0	2	54	Female	0.844552
0	2	54	Male	0.875722
0	2	55	Female	0.842771
0	2	55	Male	0.874327
0	2	56	Female	0.840964
0	2	56	Male	0.872902
0	2	57	Female	0.839131
0	2	57	Male	0.871447
0	2	58	Female	0.837271
0	2	58	Male	0.869962
0	2	59	Female	0.835386
0	2	59	Male	0.868446
0	2	60	Female	0.833474
0	2	60	Male	0.8669
0	2	61	Female	0.831537
0	2	61	Male	0.865324
0	2	62	Female	0.829574
0	2	62	Male	0.863718
0	2	63	Female	0.827586
0	2	63	Male	0.862081
0	2	64	Female	0.825573
0	2	64	Male	0.860414
0	2	65	Female	0.823535
0	2	65	Male	0.858716
0	2	66	Female	0.821473
0	2	66	Male	0.856988
0	2	67	Female	0.819386
0	2	67	Male	0.85523
0	2	68	Female	0.817274
0	2	68	Male	0.853441
0	2	69	Female	0.815139
0	2	69	Male	0.851622
0	2	70	Female	0.812981
0	2	70	Male	0.849772
0	2	71	Female	0.810799
0	2	71	Male	0.847892
0	2	72	Female	0.808593
0	2	72	Male	0.845983
0	2	73	Female	0.806365
0	2	73	Male	0.844043
0	2	74	Female	0.804115
0	2	74	Male	0.842073
0	2	75	Female	0.801842
0	2	75	Male	0.840074
0	2	76	Female	0.799547
0	2	76	Male	0.838045
0	2	77	Female	0.797231
0	2	77	Male	0.835987
0	2	78	Female	0.794894
0	2	78	Male	0.833899
0	2	79	Female	0.792535
0	2	79	Male	0.831783
0	2	80	Female	0.790156
0	2	80	Male	0.829637
0	2	81	Female	0.787757
0	2	81	Male	0.827463
0	2	82	Female	0.785338
0	2	82	Male	0.82526
0	2	83	Female	0.782899
0	2	83	Male	0.823029
0	2	84	Female	0.780441
0	2	84	Male	0.820771
0	2	85	Female	0.777964
0	2	85	Male	0.818484
0	2	86	Female	0.775469
0	2	86	Male	0.81617
0	2	87	Female	0.772955
0	2	87	Male	0.813829
0	2	88	Female	0.770423
0	2	88	Male	0.81146
0	2	89	Female	0.767875
0	2	89	Male	0.809066
0	2	90	Female	0.765308
0	2	90	Male	0.806644
0	2	91	Female	0.762726
0	2	91	Male	0.804197
0	2	92	Female	0.760127
0	2	92	Male	0.801724
0	2	93	Female	0.757511
0	2	93	Male	0.799226
0	2	94	Female	0.754881
0	2	94	Male	0.796703
0	2	95	Female	0.752234
0	2	95	Male	0.794154
0	2	96	Female	0.749573
0	2	96	Male	0.791582
0	2	97	Female	0.746898
0	2	97	Male	0.788985
0	2	98	Female	0.744208
0	2	98	Male	0.786365
0	2	99	Female	0.741504
0	2	99	Male	0.783721
0	3	18	Female	0.875865
0	3	18	Male	0.895419
0	3	19	Female	0.87485
0	3	19	Male	0.894757
0	3	20	Female	0.873812
0	3	20	Male	0.894076
0	3	21	Female	0.872752
0	3	21	Male	0.893375
0	3	22	Female	0.871669
0	3	22	Male	0.892653
0	3	23	Female	0.870563
0	3	23	Male	0.89191
0	3	24	Female	0.869433
0	3	24	Male	0.891146
0	3	25	Female	0.868281
0	3	25	Male	0.890361
0	3	26	Female	0.867105
0	3	26	Male	0.889554
0	3	27	Female	0.865906
0	3	27	Male	0.888724
0	3	28	Female	0.864683
0	3	28	Male	0.887872
0	3	29	Female	0.863437
0	3	29	Male	0.886997
0	3	30	Female	0.862166
0	3	30	Male	0.886099
0	3	31	Female	0.860871
0	3	31	Male	0.885178
0	3	32	Female	0.859553
0	3	32	Male	0.884233
0	3	33	Female	0.85821
0	3	33	Male	0.883263
0	3	34	Female	0.856843
0	3	34	Male	0.88227
0	3	35	Female	0.855452
0	3	35	Male	0.881251
0	3	36	Female	0.854036
0	3	36	Male	0.880208
0	3	37	Female	0.852596
0	3	37	Male	0.87914
0	3	38	Female	0.851132
0	3	38	Male	0.878046
0	3	39	Female	0.849644
0	3	39	Male	0.876926
0	3	40	Female	0.848131
0	3	40	Male	0.875781
0	3	41	Female	0.846594
0	3	41	Male	0.87461
0	3	42	Female	0.845032
0	3	42	Male	0.873412
0	3	43	Female	0.843447
0	3	43	Male	0.872188
0	3	44	Female	0.841837
0	3	44	Male	0.870937
0	3	45	Female	0.840203
0	3	45	Male	0.86966
0	3	46	Female	0.838545
0	3	46	Male	0.868355
0	3	47	Female	0.836863
0	3	47	Male	0.867024
0	3	48	Female	0.835158
0	3	48	Male	0.865665
0	3	49	Female	0.833428
0	3	49	Male	0.864279
0	3	50	Female	0.831675
0	3	50	Male	0.862865
0	3	51	Female	0.829899
0	3	51	Male	0.861424
0	3	52	Female	0.828099
0	3	52	Male	0.859955
0	3	53	Female	0.826276
0	3	53	Male	0.858458
0	3	54	Female	0.82443
0	3	54	Male	0.856934
0	3	55	Female	0.822561
0	3	55	Male	0.855382
0	3	56	Female	0.820669
0	3	56	Male	0.853802
0	3	57	Female	0.818755
0	3	57	Male	0.852194
0	3	58	Female	0.816819
0	3	58	Male	0.850558
0	3	59	Female	0.814861
0	3	59	Male	0.848894
0	3	60	Female	0.81288
0	3	60	Male	0.847203
0	3	61	Female	0.810879
0	3	61	Male	0.845484
0	3	62	Female	0.808855
0	3	62	Male	0.843737
0	3	63	Female	0.806811
0	3	63	Male	0.841962
0	3	64	Female	0.804745
0	3	64	Male	0.840159
0	3	65	Female	0.802659
0	3	65	Male	0.838329
0	3	66	Female	0.800553
0	3	66	Male	0.836472
0	3	67	Female	0.798426
0	3	67	Male	0.834587
0	3	68	Female	0.79628
0	3	68	Male	0.832675
0	3	69	Female	0.794114
0	3	69	Male	0.830736
0	3	70	Female	0.791929
0	3	70	Male	0.82877
0	3	71	Female	0.789724
0	3	71	Male	0.826777
0	3	72	Female	0.787501
0	3	72	Male	0.824757
0	3	73	Female	0.785259
0	3	73	Male	0.822711
0	3	74	Female	0.783
0	3	74	Male	0.820638
0	3	75	Female	0.780722
0	3	75	Male	0.818539
0	3	76	Female	0.778427
0	3	76	Male	0.816415
0	3	77	Female	0.776114
0	3	77	Male	0.814264
0	3	78	Female	0.773785
0	3	78	Male	0.812089
0	3	79	Female	0.771439
0	3	79	Male	0.809887
0	3	80	Female	0.769077
0	3	80	Male	0.807661
0	3	81	Female	0.766698
0	3	81	Male	0.80541
0	3	82	Female	0.764305
0	3	82	Male	0.803135
0	3	83	Female	0.761895
0	3	83	Male	0.800835
0	3	84	Female	0.759471
0	3	84	Male	0.798511
0	3	85	Female	0.757032
0	3	85	Male	0.796163
0	3	86	Female	0.754578
0	3	86	Male	0.793792
0	3	87	Female	0.752111
0	3	87	Male	0.791397
0	3	88	Female	0.74963
0	3	88	Male	0.78898
0	3	89	Female	0.747135
0	3	89	Male	0.78654
0	3	90	Female	0.744627
0	3	90	Male	0.784078
0	3	91	Female	0.742106
0	3	91	Male	0.781594
0	3	92	Female	0.739573
0	3	92	Male	0.779088
0	3	93	Female	0.737028
0	3	93	Male	0.776561
0	3	94	Female	0.734471
0	3	94	Male	0.774012
0	3	95	Female	0.731902
0	3	95	Male	0.771443
0	3	96	Female	0.729322
0	3	96	Male	0.768854
0	3	97	Female	0.726731
0	3	97	Male	0.766244
0	3	98	Female	0.72413
0	3	98	Male	0.763615
0	3	99	Female	0.721518
0	3	99	Male	0.760966
0	4	18	Female	0.8617
0	4	18	Male	0.883194
0	4	19	Female	0.860559
0	4	19	Male	0.882388
0	4	20	Female	0.859398
0	4	20	Male	0.881562
0	4	21	Female	0.858216
0	4	21	Male	0.880717
0	4	22	Female	0.857012
0	4	22	Male	0.87985
0	4	23	Female	0.855788
0	4	23	Male	0.878963
0	4	24	Female	0.854542
0	4	24	Male	0.878055
0	4	25	Female	0.853275
0	4	25	Male	0.877126
0	4	26	Female	0.851987
0	4	26	Male	0.876175
0	4	27	Female	0.850677
0	4	27	Male	0.875202
0	4	28	Female	0.849346
0	4	28	Male	0.874207
0	4	29	Female	0.847994
0	4	29	Male	0.87319
0	4	30	Female	0.84662
0	4	30	Male	0.872151
0	4	31	Female	0.845225
0	4	31	Male	0.871089
0	4	32	Female	0.843808
0	4	32	Male	0.870003
0	4	33	Female	0.842369
0	4	33	Male	0.868895
0	4	34	Female	0.84091
0	4	34	Male	0.867764
0	4	35	Female	0.839428
0	4	35	Male	0.866608
0	4	36	Female	0.837926
0	4	36	Male	0.86543
0	4	37	Female	0.836402
0	4	37	Male	0.864227
0	4	38	Female	0.834857
0	4	38	Male	0.863001
0	4	39	Female	0.83329
0	4	39	Male	0.86175
0	4	40	Female	0.831703
0	4	40	Male	0.860475
0	4	41	Female	0.830094
0	4	41	Male	0.859176
0	4	42	Female	0.828465
0	4	42	Male	0.857852
0	4	43	Female	0.826815
0	4	43	Male	0.856503
0	4	44	Female	0.825144
0	4	44	Male	0.85513
0	4	45	Female	0.823452
0	4	45	Male	0.853733
0	4	46	Female	0.82174
0	4	46	Male	0.85231
0	4	47	Female	0.820008
0	4	47	Male	0.850863
0	4	48	Female	0.818255
0	4	48	Male	0.84939
0	4	49	Female	0.816483
0	4	49	Male	0.847893
0	4	50	Female	0.81469
0	4	50	Male	0.846371
0	4	51	Female	0.812878
0	4	51	Male	0.844823
0	4	52	Female	0.811047
0	4	52	Male	0.843251
0	4	53	Female	0.809196
0	4	53	Male	0.841654
0	4	54	Female	0.807326
0	4	54	Male	0.840031
0	4	55	Female	0.805437
0	4	55	Male	0.838384
0	4	56	Female	0.803529
0	4	56	Male	0.836712
0	4	57	Female	0.801603
0	4	57	Male	0.835015
0	4	58	Female	0.799658
0	4	58	Male	0.833293
0	4	59	Female	0.797696
0	4	59	Male	0.831547
0	4	60	Female	0.795715
0	4	60	Male	0.829775
0	4	61	Female	0.793717
0	4	61	Male	0.82798
0	4	62	Female	0.791701
0	4	62	Male	0.826159
0	4	63	Female	0.789669
0	4	63	Male	0.824315
0	4	64	Female	0.787619
0	4	64	Male	0.822446
0	4	65	Female	0.785553
0	4	65	Male	0.820553
0	4	66	Female	0.78347
0	4	66	Male	0.818636
0	4	67	Female	0.781371
0	4	67	Male	0.816695
0	4	68	Female	0.779256
0	4	68	Male	0.814731
0	4	69	Female	0.777125
0	4	69	Male	0.812743
0	4	70	Female	0.774979
0	4	70	Male	0.810731
0	4	71	Female	0.772818
0	4	71	Male	0.808697
0	4	72	Female	0.770642
0	4	72	Male	0.806639
0	4	73	Female	0.768452
0	4	73	Male	0.804559
0	4	74	Female	0.766247
0	4	74	Male	0.802456
0	4	75	Female	0.764028
0	4	75	Male	0.80033
0	4	76	Female	0.761795
0	4	76	Male	0.798183
0	4	77	Female	0.759549
0	4	77	Male	0.796013
0	4	78	Female	0.757289
0	4	78	Male	0.793822
0	4	79	Female	0.755017
0	4	79	Male	0.791609
0	4	80	Female	0.752732
0	4	80	Male	0.789374
0	4	81	Female	0.750434
0	4	81	Male	0.787119
0	4	82	Female	0.748124
0	4	82	Male	0.784843
0	4	83	Female	0.745803
0	4	83	Male	0.782546
0	4	84	Female	0.743469
0	4	84	Male	0.780229
0	4	85	Female	0.741125
0	4	85	Male	0.777892
0	4	86	Female	0.738769
0	4	86	Male	0.775535
0	4	87	Female	0.736403
0	4	87	Male	0.773158
0	4	88	Female	0.734026
0	4	88	Male	0.770762
0	4	89	Female	0.731639
0	4	89	Male	0.768347
0	4	90	Female	0.729241
0	4	90	Male	0.765914
0	4	91	Female	0.726834
0	4	91	Male	0.763462
0	4	92	Female	0.724418
0	4	92	Male	0.760991
0	4	93	Female	0.721992
0	4	93	Male	0.758503
0	4	94	Female	0.719558
0	4	94	Male	0.755997
0	4	95	Female	0.717114
0	4	95	Male	0.753474
0	4	96	Female	0.714663
0	4	96	Male	0.750934
0	4	97	Female	0.712203
0	4	97	Male	0.748376
0	4	98	Female	0.709735
0	4	98	Male	0.745803
0	4	99	Female	0.707259
0	4	99	Male	0.743213
0	5	18	Female	0.849234
0	5	18	Male	0.871994
0	5	19	Female	0.848015
0	5	19	Male	0.871077
0	5	20	Female	0.846778
0	5	20	Male	0.870141
0	5	21	Female	0.845522
0	5	21	Male	0.869185
0	5	22	Female	0.844248
0	5	22	Male	0.86821
0	5	23	Female	0.842955
0	5	23	Male	0.867215
0	5	24	Female	0.841643
0	5	24	Male	0.866201
0	5	25	Female	0.840313
0	5	25	Male	0.865166
0	5	26	Female	0.838964
0	5	26	Male	0.864111
0	5	27	Female	0.837597
0	5	27	Male	0.863036
0	5	28	Female	0.836211
0	5	28	Male	0.86194
0	5	29	Female	0.834807
0	5	29	Male	0.860824
0	5	30	Female	0.833384
0	5	30	Male	0.859687
0	5	31	Female	0.831942
0	5	31	Male	0.858529
0	5	32	Female	0.830482
0	5	32	Male	0.857349
0	5	33	Female	0.829004
0	5	33	Male	0.856149
0	5	34	Female	0.827508
0	5	34	Male	0.854927
0	5	35	Female	0.825993
0	5	35	Male	0.853684
0	5	36	Female	0.824461
0	5	36	Male	0.85242
0	5	37	Female	0.82291
0	5	37	Male	0.851133
0	5	38	Female	0.821341
0	5	38	Male	0.849825
0	5	39	Female	0.819755
0	5	39	Male	0.848496
0	5	40	Female	0.818151
0	5	40	Male	0.847144
0	5	41	Female	0.816529
0	5	41	Male	0.845771
0	5	42	Female	0.81489
0	5	42	Male	0.844375
0	5	43	Female	0.813233
0	5	43	Male	0.842958
0	5	44	Female	0.81156
0	5	44	Male	0.841519
0	5	45	Female	0.809869
0	5	45	Male	0.840058
0	5	46	Female	0.808161
0	5	46	Male	0.838575
0	5	47	Female	0.806437
0	5	47	Male	0.83707
0	5	48	Female	0.804696
0	5	48	Male	0.835542
0	5	49	Female	0.802939
0	5	49	Male	0.833993
0	5	50	Female	0.801165
0	5	50	Male	0.832422
0	5	51	Female	0.799375
0	5	51	Male	0.830829
0	5	52	Female	0.79757
0	5	52	Male	0.829214
0	5	53	Female	0.795748
0	5	53	Male	0.827578
0	5	54	Female	0.793911
0	5	54	Male	0.825919
0	5	55	Female	0.792059
0	5	55	Male	0.824239
0	5	56	Female	0.790192
0	5	56	Male	0.822537
0	5	57	Female	0.788309
0	5	57	Male	0.820814
0	5	58	Female	0.786412
0	5	58	Male	0.819069
0	5	59	Female	0.784501
0	5	59	Male	0.817303
0	5	60	Female	0.782575
0	5	60	Male	0.815515
0	5	61	Female	0.780635
0	5	61	Male	0.813707
0	5	62	Female	0.778681
0	5	62	Male	0.811877
0	5	63	Female	0.776713
0	5	63	Male	0.810026
0	5	64	Female	0.774732
0	5	64	Male	0.808155
0	5	65	Female	0.772737
0	5	65	Male	0.806263
0	5	66	Female	0.770729
0	5	66	Male	0.80435
0	5	67	Female	0.768709
0	5	67	Male	0.802417
0	5	68	Female	0.766676
0	5	68	Male	0.800464
0	5	69	Female	0.764631
0	5	69	Male	0.79849
0	5	70	Female	0.762573
0	5	70	Male	0.796497
0	5	71	Female	0.760504
0	5	71	Male	0.794484
0	5	72	Female	0.758422
0	5	72	Male	0.792452
0	5	73	Female	0.75633
0	5	73	Male	0.7904
0	5	74	Female	0.754226
0	5	74	Male	0.788328
0	5	75	Female	0.752111
0	5	75	Male	0.786238
0	5	76	Female	0.749985
0	5	76	Male	0.784129
0	5	77	Female	0.747849
0	5	77	Male	0.782001
0	5	78	Female	0.745702
0	5	78	Male	0.779855
0	5	79	Female	0.743546
0	5	79	Male	0.777691
0	5	80	Female	0.741379
0	5	80	Male	0.775508
0	5	81	Female	0.739203
0	5	81	Male	0.773308
0	5	82	Female	0.737017
0	5	82	Male	0.77109
0	5	83	Female	0.734822
0	5	83	Male	0.768855
0	5	84	Female	0.732618
0	5	84	Male	0.766602
0	5	85	Female	0.730406
0	5	85	Male	0.764333
0	5	86	Female	0.728184
0	5	86	Male	0.762047
0	5	87	Female	0.725955
0	5	87	Male	0.759744
0	5	88	Female	0.723718
0	5	88	Male	0.757425
0	5	89	Female	0.721472
0	5	89	Male	0.75509
0	5	90	Female	0.719219
0	5	90	Male	0.752739
0	5	91	Female	0.716959
0	5	91	Male	0.750372
0	5	92	Female	0.714691
0	5	92	Male	0.74799
0	5	93	Female	0.712417
0	5	93	Male	0.745593
0	5	94	Female	0.710135
0	5	94	Male	0.743181
0	5	95	Female	0.707847
0	5	95	Male	0.740754
0	5	96	Female	0.705553
0	5	96	Male	0.738313
0	5	97	Female	0.703253
0	5	97	Male	0.735857
0	5	98	Female	0.700946
0	5	98	Male	0.733388
0	5	99	Female	0.698634
0	5	99	Male	0.730905
0	6	18	Female	0.838908
0	6	18	Male	0.862279
0	6	19	Female	0.837657
0	6	19	Male	0.861289
0	6	20	Female	0.83639
0	6	20	Male	0.860282
0	6	21	Female	0.835107
0	6	21	Male	0.859257
0	6	22	Female	0.833809
0	6	22	Male	0.858215
0	6	23	Female	0.832494
0	6	23	Male	0.857155
0	6	24	Female	0.831164
0	6	24	Male	0.856077
0	6	25	Female	0.829818
0	6	25	Male	0.854981
0	6	26	Female	0.828456
0	6	26	Male	0.853866
0	6	27	Female	0.827079
0	6	27	Male	0.852734
0	6	28	Female	0.825686
0	6	28	Male	0.851583
0	6	29	Female	0.824277
0	6	29	Male	0.850413
0	6	30	Female	0.822853
0	6	30	Male	0.849225
0	6	31	Female	0.821414
0	6	31	Male	0.848018
0	6	32	Female	0.819959
0	6	32	Male	0.846793
0	6	33	Female	0.818489
0	6	33	Male	0.845549
0	6	34	Female	0.817004
0	6	34	Male	0.844286
0	6	35	Female	0.815504
0	6	35	Male	0.843004
0	6	36	Female	0.813989
0	6	36	Male	0.841704
0	6	37	Female	0.812459
0	6	37	Male	0.840384
0	6	38	Female	0.810914
0	6	38	Male	0.839045
0	6	39	Female	0.809354
0	6	39	Male	0.837688
0	6	40	Female	0.80778
0	6	40	Male	0.836311
0	6	41	Female	0.806192
0	6	41	Male	0.834915
0	6	42	Female	0.804589
0	6	42	Male	0.833501
0	6	43	Female	0.802973
0	6	43	Male	0.832067
0	6	44	Female	0.801342
0	6	44	Male	0.830614
0	6	45	Female	0.799697
0	6	45	Male	0.829142
0	6	46	Female	0.798039
0	6	46	Male	0.827651
0	6	47	Female	0.796367
0	6	47	Male	0.826141
0	6	48	Female	0.794681
0	6	48	Male	0.824612
0	6	49	Female	0.792982
0	6	49	Male	0.823065
0	6	50	Female	0.79127
0	6	50	Male	0.821498
0	6	51	Female	0.789546
0	6	51	Male	0.819913
0	6	52	Female	0.787808
0	6	52	Male	0.818308
0	6	53	Female	0.786057
0	6	53	Male	0.816685
0	6	54	Female	0.784295
0	6	54	Male	0.815044
0	6	55	Female	0.782519
0	6	55	Male	0.813384
0	6	56	Female	0.780732
0	6	56	Male	0.811705
0	6	57	Female	0.778933
0	6	57	Male	0.810008
0	6	58	Female	0.777121
0	6	58	Male	0.808293
0	6	59	Female	0.775299
0	6	59	Male	0.806559
0	6	60	Female	0.773464
0	6	60	Male	0.804808
0	6	61	Female	0.771619
0	6	61	Male	0.803038
0	6	62	Female	0.769762
0	6	62	Male	0.80125
0	6	63	Female	0.767894
0	6	63	Male	0.799445
0	6	64	Female	0.766016
0	6	64	Male	0.797622
0	6	65	Female	0.764127
0	6	65	Male	0.795781
0	6	66	Female	0.762228
0	6	66	Male	0.793923
0	6	67	Female	0.760318
0	6	67	Male	0.792047
0	6	68	Female	0.758399
0	6	68	Male	0.790154
0	6	69	Female	0.756469
0	6	69	Male	0.788244
0	6	70	Female	0.75453
0	6	70	Male	0.786318
0	6	71	Female	0.752582
0	6	71	Male	0.784374
0	6	72	Female	0.750624
0	6	72	Male	0.782414
0	6	73	Female	0.748658
0	6	73	Male	0.780438
0	6	74	Female	0.746682
0	6	74	Male	0.778445
0	6	75	Female	0.744698
0	6	75	Male	0.776435
0	6	76	Female	0.742705
0	6	76	Male	0.77441
0	6	77	Female	0.740704
0	6	77	Male	0.772369
0	6	78	Female	0.738695
0	6	78	Male	0.770313
0	6	79	Female	0.736678
0	6	79	Male	0.76824
0	6	80	Female	0.734653
0	6	80	Male	0.766153
0	6	81	Female	0.732621
0	6	81	Male	0.76405
0	6	82	Female	0.730581
0	6	82	Male	0.761932
0	6	83	Female	0.728534
0	6	83	Male	0.7598
0	6	84	Female	0.72648
0	6	84	Male	0.757652
0	6	85	Female	0.72442
0	6	85	Male	0.755491
0	6	86	Female	0.722352
0	6	86	Male	0.753315
0	6	87	Female	0.720279
0	6	87	Male	0.751125
0	6	88	Female	0.718199
0	6	88	Male	0.74892
0	6	89	Female	0.716113
0	6	89	Male	0.746703
0	6	90	Female	0.714021
0	6	90	Male	0.744471
0	6	91	Female	0.711924
0	6	91	Male	0.742226
0	6	92	Female	0.709821
0	6	92	Male	0.739969
0	6	93	Female	0.707712
0	6	93	Male	0.737698
0	6	94	Female	0.705599
0	6	94	Male	0.735414
0	6	95	Female	0.703481
0	6	95	Male	0.733118
0	6	96	Female	0.701357
0	6	96	Male	0.730809
0	6	97	Female	0.69923
0	6	97	Male	0.728488
0	6	98	Female	0.697097
0	6	98	Male	0.726155
0	6	99	Female	0.694961
0	6	99	Male	0.72381
0	7	18	Female	0.83084
0	7	18	Male	0.854296
0	7	19	Female	0.829594
0	7	19	Male	0.853272
0	7	20	Female	0.828335
0	7	20	Male	0.852233
0	7	21	Female	0.827062
0	7	21	Male	0.851179
0	7	22	Female	0.825777
0	7	22	Male	0.850109
0	7	23	Female	0.824478
0	7	23	Male	0.849023
0	7	24	Female	0.823166
0	7	24	Male	0.847921
0	7	25	Female	0.821841
0	7	25	Male	0.846804
0	7	26	Female	0.820503
0	7	26	Male	0.845671
0	7	27	Female	0.819152
0	7	27	Male	0.844522
0	7	28	Female	0.817788
0	7	28	Male	0.843356
0	7	29	Female	0.816412
0	7	29	Male	0.842175
0	7	30	Female	0.815022
0	7	30	Male	0.840978
0	7	31	Female	0.81362
0	7	31	Male	0.839764
0	7	32	Female	0.812205
0	7	32	Male	0.838535
0	7	33	Female	0.810778
0	7	33	Male	0.837289
0	7	34	Female	0.809338
0	7	34	Male	0.836027
0	7	35	Female	0.807886
0	7	35	Male	0.834748
0	7	36	Female	0.806421
0	7	36	Male	0.833454
0	7	37	Female	0.804945
0	7	37	Male	0.832143
0	7	38	Female	0.803456
0	7	38	Male	0.830815
0	7	39	Female	0.801955
0	7	39	Male	0.829472
0	7	40	Female	0.800443
0	7	40	Male	0.828112
0	7	41	Female	0.798919
0	7	41	Male	0.826735
0	7	42	Female	0.797383
0	7	42	Male	0.825343
0	7	43	Female	0.795835
0	7	43	Male	0.823934
0	7	44	Female	0.794277
0	7	44	Male	0.822509
0	7	45	Female	0.792707
0	7	45	Male	0.821067
0	7	46	Female	0.791125
0	7	46	Male	0.81961
0	7	47	Female	0.789533
0	7	47	Male	0.818136
0	7	48	Female	0.78793
0	7	48	Male	0.816646
0	7	49	Female	0.786316
0	7	49	Male	0.81514
0	7	50	Female	0.784692
0	7	50	Male	0.813617
0	7	51	Female	0.783057
0	7	51	Male	0.812079
0	7	52	Female	0.781411
0	7	52	Male	0.810525
0	7	53	Female	0.779756
0	7	53	Male	0.808955
0	7	54	Female	0.77809
0	7	54	Male	0.807369
0	7	55	Female	0.776414
0	7	55	Male	0.805767
0	7	56	Female	0.774729
0	7	56	Male	0.804149
0	7	57	Female	0.773034
0	7	57	Male	0.802516
0	7	58	Female	0.771329
0	7	58	Male	0.800867
0	7	59	Female	0.769615
0	7	59	Male	0.799203
0	7	60	Female	0.767891
0	7	60	Male	0.797523
0	7	61	Female	0.766159
0	7	61	Male	0.795828
0	7	62	Female	0.764418
0	7	62	Male	0.794117
0	7	63	Female	0.762668
0	7	63	Male	0.792392
0	7	64	Female	0.760909
0	7	64	Male	0.790651
0	7	65	Female	0.759142
0	7	65	Male	0.788895
0	7	66	Female	0.757366
0	7	66	Male	0.787125
0	7	67	Female	0.755583
0	7	67	Male	0.785339
0	7	68	Female	0.753791
0	7	68	Male	0.783539
0	7	69	Female	0.751991
0	7	69	Male	0.781724
0	7	70	Female	0.750184
0	7	70	Male	0.779895
0	7	71	Female	0.748369
0	7	71	Male	0.778052
0	7	72	Female	0.746547
0	7	72	Male	0.776194
0	7	73	Female	0.744718
0	7	73	Male	0.774322
0	7	74	Female	0.742881
0	7	74	Male	0.772437
0	7	75	Female	0.741038
0	7	75	Male	0.770537
0	7	76	Female	0.739188
0	7	76	Male	0.768624
0	7	77	Female	0.737331
0	7	77	Male	0.766697
0	7	78	Female	0.735468
0	7	78	Male	0.764756
0	7	79	Female	0.733599
0	7	79	Male	0.762802
0	7	80	Female	0.731723
0	7	80	Male	0.760835
0	7	81	Female	0.729842
0	7	81	Male	0.758855
0	7	82	Female	0.727955
0	7	82	Male	0.756862
0	7	83	Female	0.726062
0	7	83	Male	0.754857
0	7	84	Female	0.724164
0	7	84	Male	0.752838
0	7	85	Female	0.72226
0	7	85	Male	0.750807
0	7	86	Female	0.720352
0	7	86	Male	0.748764
0	7	87	Female	0.718438
0	7	87	Male	0.746709
0	7	88	Female	0.71652
0	7	88	Male	0.744641
0	7	89	Female	0.714597
0	7	89	Male	0.742562
0	7	90	Female	0.712669
0	7	90	Male	0.740471
0	7	91	Female	0.710737
0	7	91	Male	0.738368
0	7	92	Female	0.708801
0	7	92	Male	0.736254
0	7	93	Female	0.706861
0	7	93	Male	0.734129
0	7	94	Female	0.704917
0	7	94	Male	0.731993
0	7	95	Female	0.70297
0	7	95	Male	0.729846
0	7	96	Female	0.701018
0	7	96	Male	0.727688
0	7	97	Female	0.699064
0	7	97	Male	0.725519
0	7	98	Female	0.697106
0	7	98	Male	0.72334
0	7	99	Female	0.695145
0	7	99	Male	0.721151
0	8	18	Female	0.824849
0	8	18	Male	0.848059
0	8	19	Female	0.823634
0	8	19	Male	0.847033
0	8	20	Female	0.822407
0	8	20	Male	0.845993
0	8	21	Female	0.82117
0	8	21	Male	0.84494
0	8	22	Female	0.819922
0	8	22	Male	0.843874
0	8	23	Female	0.818663
0	8	23	Male	0.842794
0	8	24	Female	0.817393
0	8	24	Male	0.8417
0	8	25	Female	0.816112
0	8	25	Male	0.840593
0	8	26	Female	0.81482
0	8	26	Male	0.839472
0	8	27	Female	0.813518
0	8	27	Male	0.838338
0	8	28	Female	0.812205
0	8	28	Male	0.83719
0	8	29	Female	0.810881
0	8	29	Male	0.836028
0	8	30	Female	0.809546
0	8	30	Male	0.834852
0	8	31	Female	0.808202
0	8	31	Male	0.833662
0	8	32	Female	0.806846
0	8	32	Male	0.832458
0	8	33	Female	0.805481
0	8	33	Male	0.831241
0	8	34	Female	0.804105
0	8	34	Male	0.830009
0	8	35	Female	0.802719
0	8	35	Male	0.828764
0	8	36	Female	0.801323
0	8	36	Male	0.827505
0	8	37	Female	0.799917
0	8	37	Male	0.826231
0	8	38	Female	0.798501
0	8	38	Male	0.824944
0	8	39	Female	0.797075
0	8	39	Male	0.823643
0	8	40	Female	0.79564
0	8	40	Male	0.822328
0	8	41	Female	0.794194
0	8	41	Male	0.820999
0	8	42	Female	0.79274
0	8	42	Male	0.819656
0	8	43	Female	0.791275
0	8	43	Male	0.818299
0	8	44	Female	0.789802
0	8	44	Male	0.816929
0	8	45	Female	0.788319
0	8	45	Male	0.815544
0	8	46	Female	0.786827
0	8	46	Male	0.814146
0	8	47	Female	0.785326
0	8	47	Male	0.812733
0	8	48	Female	0.783816
0	8	48	Male	0.811307
0	8	49	Female	0.782297
0	8	49	Male	0.809867
0	8	50	Female	0.78077
0	8	50	Male	0.808414
0	8	51	Female	0.779234
0	8	51	Male	0.806946
0	8	52	Female	0.777689
0	8	52	Male	0.805465
0	8	53	Female	0.776136
0	8	53	Male	0.803971
0	8	54	Female	0.774575
0	8	54	Male	0.802462
0	8	55	Female	0.773005
0	8	55	Male	0.800941
0	8	56	Female	0.771428
0	8	56	Male	0.799405
0	8	57	Female	0.769843
0	8	57	Male	0.797857
0	8	58	Female	0.76825
0	8	58	Male	0.796295
0	8	59	Female	0.766649
0	8	59	Male	0.794719
0	8	60	Female	0.765041
0	8	60	Male	0.793131
0	8	61	Female	0.763425
0	8	61	Male	0.791529
0	8	62	Female	0.761802
0	8	62	Male	0.789914
0	8	63	Female	0.760172
0	8	63	Male	0.788286
0	8	64	Female	0.758535
0	8	64	Male	0.786645
0	8	65	Female	0.756891
0	8	65	Male	0.784992
0	8	66	Female	0.75524
0	8	66	Male	0.783325
0	8	67	Female	0.753582
0	8	67	Male	0.781646
0	8	68	Female	0.751919
0	8	68	Male	0.779954
0	8	69	Female	0.750248
0	8	69	Male	0.778249
0	8	70	Female	0.748572
0	8	70	Male	0.776532
0	8	71	Female	0.746889
0	8	71	Male	0.774802
0	8	72	Female	0.745201
0	8	72	Male	0.773061
0	8	73	Female	0.743507
0	8	73	Male	0.771307
0	8	74	Female	0.741807
0	8	74	Male	0.769541
0	8	75	Female	0.740101
0	8	75	Male	0.767763
0	8	76	Female	0.73839
0	8	76	Male	0.765973
0	8	77	Female	0.736674
0	8	77	Male	0.764171
0	8	78	Female	0.734953
0	8	78	Male	0.762358
0	8	79	Female	0.733227
0	8	79	Male	0.760533
0	8	80	Female	0.731496
0	8	80	Male	0.758696
0	8	81	Female	0.72976
0	8	81	Male	0.756849
0	8	82	Female	0.72802
0	8	82	Male	0.75499
0	8	83	Female	0.726275
0	8	83	Male	0.75312
0	8	84	Female	0.724526
0	8	84	Male	0.751239
0	8	85	Female	0.722773
0	8	85	Male	0.749347
0	8	86	Female	0.721016
0	8	86	Male	0.747444
0	8	87	Female	0.719255
0	8	87	Male	0.745531
0	8	88	Female	0.717491
0	8	88	Male	0.743607
0	8	89	Female	0.715723
0	8	89	Male	0.741673
0	8	90	Female	0.713951
0	8	90	Male	0.739729
0	8	91	Female	0.712176
0	8	91	Male	0.737775
0	8	92	Female	0.710399
0	8	92	Male	0.735811
0	8	93	Female	0.708618
0	8	93	Male	0.733837
0	8	94	Female	0.706834
0	8	94	Male	0.731853
0	8	95	Female	0.705048
0	8	95	Male	0.72986
0	8	96	Female	0.703259
0	8	96	Male	0.727857
0	8	97	Female	0.701468
0	8	97	Male	0.725846
0	8	98	Female	0.699675
0	8	98	Male	0.723825
0	8	99	Female	0.697879
0	8	99	Male	0.721795
0	9	18	Female	0.820535
0	9	18	Male	0.843373
0	9	19	Female	0.819363
0	9	19	Male	0.842365
0	9	20	Female	0.818181
0	9	20	Male	0.841346
0	9	21	Female	0.816991
0	9	21	Male	0.840316
0	9	22	Female	0.815791
0	9	22	Male	0.839273
0	9	23	Female	0.814582
0	9	23	Male	0.838219
0	9	24	Female	0.813363
0	9	24	Male	0.837154
0	9	25	Female	0.812136
0	9	25	Male	0.836076
0	9	26	Female	0.8109
0	9	26	Male	0.834987
0	9	27	Female	0.809654
0	9	27	Male	0.833886
0	9	28	Female	0.8084
0	9	28	Male	0.832773
0	9	29	Female	0.807136
0	9	29	Male	0.831649
0	9	30	Female	0.805864
0	9	30	Male	0.830512
0	9	31	Female	0.804583
0	9	31	Male	0.829364
0	9	32	Female	0.803294
0	9	32	Male	0.828203
0	9	33	Female	0.801995
0	9	33	Male	0.827031
0	9	34	Female	0.800689
0	9	34	Male	0.825847
0	9	35	Female	0.799373
0	9	35	Male	0.82465
0	9	36	Female	0.798049
0	9	36	Male	0.823442
0	9	37	Female	0.796717
0	9	37	Male	0.822222
0	9	38	Female	0.795377
0	9	38	Male	0.82099
0	9	39	Female	0.794028
0	9	39	Male	0.819745
0	9	40	Female	0.792671
0	9	40	Male	0.818489
0	9	41	Female	0.791306
0	9	41	Male	0.817221
0	9	42	Female	0.789933
0	9	42	Male	0.815941
0	9	43	Female	0.788552
0	9	43	Male	0.814648
0	9	44	Female	0.787163
0	9	44	Male	0.813344
0	9	45	Female	0.785767
0	9	45	Male	0.812028
0	9	46	Female	0.784363
0	9	46	Male	0.8107
0	9	47	Female	0.782951
0	9	47	Male	0.80936
0	9	48	Female	0.781532
0	9	48	Male	0.808008
0	9	49	Female	0.780105
0	9	49	Male	0.806644
0	9	50	Female	0.778671
0	9	50	Male	0.805268
0	9	51	Female	0.777231
0	9	51	Male	0.80388
0	9	52	Female	0.775782
0	9	52	Male	0.802481
0	9	53	Female	0.774327
0	9	53	Male	0.801069
0	9	54	Female	0.772865
0	9	54	Male	0.799646
0	9	55	Female	0.771397
0	9	55	Male	0.798212
0	9	56	Female	0.769921
0	9	56	Male	0.796765
0	9	57	Female	0.768439
0	9	57	Male	0.795307
0	9	58	Female	0.766951
0	9	58	Male	0.793837
0	9	59	Female	0.765456
0	9	59	Male	0.792356
0	9	60	Female	0.763955
0	9	60	Male	0.790863
0	9	61	Female	0.762448
0	9	61	Male	0.789359
0	9	62	Female	0.760935
0	9	62	Male	0.787843
0	9	63	Female	0.759416
0	9	63	Male	0.786316
0	9	64	Female	0.757891
0	9	64	Male	0.784778
0	9	65	Female	0.75636
0	9	65	Male	0.783229
0	9	66	Female	0.754824
0	9	66	Male	0.781668
0	9	67	Female	0.753283
0	9	67	Male	0.780096
0	9	68	Female	0.751736
0	9	68	Male	0.778513
0	9	69	Female	0.750184
0	9	69	Male	0.77692
0	9	70	Female	0.748626
0	9	70	Male	0.775315
0	9	71	Female	0.747064
0	9	71	Male	0.7737
0	9	72	Female	0.745497
0	9	72	Male	0.772073
0	9	73	Female	0.743926
0	9	73	Male	0.770437
0	9	74	Female	0.742349
0	9	74	Male	0.768789
0	9	75	Female	0.740768
0	9	75	Male	0.767131
0	9	76	Female	0.739183
0	9	76	Male	0.765463
0	9	77	Female	0.737594
0	9	77	Male	0.763785
0	9	78	Female	0.736001
0	9	78	Male	0.762096
0	9	79	Female	0.734403
0	9	79	Male	0.760397
0	9	80	Female	0.732802
0	9	80	Male	0.758688
0	9	81	Female	0.731197
0	9	81	Male	0.756969
0	9	82	Female	0.729589
0	9	82	Male	0.755241
0	9	83	Female	0.727977
0	9	83	Male	0.753502
0	9	84	Female	0.726362
0	9	84	Male	0.751755
0	9	85	Female	0.724743
0	9	85	Male	0.749997
0	9	86	Female	0.723122
0	9	86	Male	0.748231
0	9	87	Female	0.721497
0	9	87	Male	0.746455
0	9	88	Female	0.71987
0	9	88	Male	0.744669
0	9	89	Female	0.71824
0	9	89	Male	0.742875
0	9	90	Female	0.716608
0	9	90	Male	0.741072
0	9	91	Female	0.714973
0	9	91	Male	0.739261
0	9	92	Female	0.713336
0	9	92	Male	0.73744
0	9	93	Female	0.711697
0	9	93	Male	0.735611
0	9	94	Female	0.710056
0	9	94	Male	0.733774
0	9	95	Female	0.708413
0	9	95	Male	0.731928
0	9	96	Female	0.706769
0	9	96	Male	0.730075
0	9	97	Female	0.705122
0	9	97	Male	0.728213
0	9	98	Female	0.703475
0	9	98	Male	0.726344
0	9	99	Female	0.701826
0	9	99	Male	0.724467
0	10	18	Female	0.817376
0	10	18	Male	0.839896
0	10	19	Female	0.816248
0	10	19	Male	0.838918
0	10	20	Female	0.815112
0	10	20	Male	0.837929
0	10	21	Female	0.813968
0	10	21	Male	0.836929
0	10	22	Female	0.812816
0	10	22	Male	0.83592
0	10	23	Female	0.811656
0	10	23	Male	0.834901
0	10	24	Female	0.810488
0	10	24	Male	0.833871
0	10	25	Female	0.809312
0	10	25	Male	0.832832
0	10	26	Female	0.808129
0	10	26	Male	0.831782
0	10	27	Female	0.806938
0	10	27	Male	0.830721
0	10	28	Female	0.805739
0	10	28	Male	0.829651
0	10	29	Female	0.804533
0	10	29	Male	0.82857
0	10	30	Female	0.803319
0	10	30	Male	0.827478
0	10	31	Female	0.802097
0	10	31	Male	0.826376
0	10	32	Female	0.800868
0	10	32	Male	0.825264
0	10	33	Female	0.799632
0	10	33	Male	0.824142
0	10	34	Female	0.798388
0	10	34	Male	0.823009
0	10	35	Female	0.797137
0	10	35	Male	0.821865
0	10	36	Female	0.795878
0	10	36	Male	0.820711
0	10	37	Female	0.794612
0	10	37	Male	0.819546
0	10	38	Female	0.79334
0	10	38	Male	0.818371
0	10	39	Female	0.79206
0	10	39	Male	0.817186
0	10	40	Female	0.790773
0	10	40	Male	0.81599
0	10	41	Female	0.789479
0	10	41	Male	0.814783
0	10	42	Female	0.788179
0	10	42	Male	0.813566
0	10	43	Female	0.786871
0	10	43	Male	0.812339
0	10	44	Female	0.785557
0	10	44	Male	0.811101
0	10	45	Female	0.784236
0	10	45	Male	0.809852
0	10	46	Female	0.782909
0	10	46	Male	0.808593
0	10	47	Female	0.781575
0	10	47	Male	0.807323
0	10	48	Female	0.780235
0	10	48	Male	0.806043
0	10	49	Female	0.778889
0	10	49	Male	0.804753
0	10	50	Female	0.777536
0	10	50	Male	0.803452
0	10	51	Female	0.776177
0	10	51	Male	0.80214
0	10	52	Female	0.774812
0	10	52	Male	0.800819
0	10	53	Female	0.773441
0	10	53	Male	0.799486
0	10	54	Female	0.772065
0	10	54	Male	0.798144
0	10	55	Female	0.770682
0	10	55	Male	0.796791
0	10	56	Female	0.769294
0	10	56	Male	0.795428
0	10	57	Female	0.767901
0	10	57	Male	0.794054
0	10	58	Female	0.766501
0	10	58	Male	0.792671
0	10	59	Female	0.765097
0	10	59	Male	0.791277
0	10	60	Female	0.763687
0	10	60	Male	0.789873
0	10	61	Female	0.762272
0	10	61	Male	0.788459
0	10	62	Female	0.760852
0	10	62	Male	0.787035
0	10	63	Female	0.759427
0	10	63	Male	0.7856
0	10	64	Female	0.757997
0	10	64	Male	0.784156
0	10	65	Female	0.756562
0	10	65	Male	0.782702
0	10	66	Female	0.755123
0	10	66	Male	0.781238
0	10	67	Female	0.753679
0	10	67	Male	0.779765
0	10	68	Female	0.75223
0	10	68	Male	0.778281
0	10	69	Female	0.750778
0	10	69	Male	0.776788
0	10	70	Female	0.749321
0	10	70	Male	0.775285
0	10	71	Female	0.74786
0	10	71	Male	0.773773
0	10	72	Female	0.746395
0	10	72	Male	0.772251
0	10	73	Female	0.744926
0	10	73	Male	0.77072
0	10	74	Female	0.743453
0	10	74	Male	0.76918
0	10	75	Female	0.741977
0	10	75	Male	0.76763
0	10	76	Female	0.740497
0	10	76	Male	0.766071
0	10	77	Female	0.739014
0	10	77	Male	0.764503
0	10	78	Female	0.737527
0	10	78	Male	0.762926
0	10	79	Female	0.736038
0	10	79	Male	0.76134
0	10	80	Female	0.734545
0	10	80	Male	0.759746
0	10	81	Female	0.733049
0	10	81	Male	0.758142
0	10	82	Female	0.731551
0	10	82	Male	0.75653
0	10	83	Female	0.73005
0	10	83	Male	0.75491
0	10	84	Female	0.728546
0	10	84	Male	0.753281
0	10	85	Female	0.72704
0	10	85	Male	0.751644
0	10	86	Female	0.725531
0	10	86	Male	0.749998
0	10	87	Female	0.72402
0	10	87	Male	0.748345
0	10	88	Female	0.722507
0	10	88	Male	0.746683
0	10	89	Female	0.720993
0	10	89	Male	0.745014
0	10	90	Female	0.719476
0	10	90	Male	0.743336
0	10	91	Female	0.717958
0	10	91	Male	0.741651
0	10	92	Female	0.716438
0	10	92	Male	0.739959
0	10	93	Female	0.714916
0	10	93	Male	0.738259
0	10	94	Female	0.713393
0	10	94	Male	0.736552
0	10	95	Female	0.711869
0	10	95	Male	0.734838
0	10	96	Female	0.710344
0	10	96	Male	0.733117
0	10	97	Female	0.708818
0	10	97	Male	0.731389
0	10	98	Female	0.707291
0	10	98	Male	0.729654
0	10	99	Female	0.705763
0	10	99	Male	0.727912
0	11	18	Female	0.814816
0	11	18	Male	0.837211
0	11	19	Female	0.813725
0	11	19	Male	0.836261
0	11	20	Female	0.812626
0	11	20	Male	0.835302
0	11	21	Female	0.811521
0	11	21	Male	0.834334
0	11	22	Female	0.810408
0	11	22	Male	0.833358
0	11	23	Female	0.809288
0	11	23	Male	0.832372
0	11	24	Female	0.808161
0	11	24	Male	0.831377
0	11	25	Female	0.807028
0	11	25	Male	0.830373
0	11	26	Female	0.805887
0	11	26	Male	0.829359
0	11	27	Female	0.80474
0	11	27	Male	0.828337
0	11	28	Female	0.803585
0	11	28	Male	0.827305
0	11	29	Female	0.802424
0	11	29	Male	0.826264
0	11	30	Female	0.801256
0	11	30	Male	0.825214
0	11	31	Female	0.800082
0	11	31	Male	0.824155
0	11	32	Female	0.798901
0	11	32	Male	0.823086
0	11	33	Female	0.797713
0	11	33	Male	0.822008
0	11	34	Female	0.796519
0	11	34	Male	0.82092
0	11	35	Female	0.795318
0	11	35	Male	0.819823
0	11	36	Female	0.794111
0	11	36	Male	0.818717
0	11	37	Female	0.792898
0	11	37	Male	0.817602
0	11	38	Female	0.791678
0	11	38	Male	0.816477
0	11	39	Female	0.790452
0	11	39	Male	0.815342
0	11	40	Female	0.78922
0	11	40	Male	0.814198
0	11	41	Female	0.787981
0	11	41	Male	0.813045
0	11	42	Female	0.786737
0	11	42	Male	0.811882
0	11	43	Female	0.785486
0	11	43	Male	0.81071
0	11	44	Female	0.78423
0	11	44	Male	0.809528
0	11	45	Female	0.782968
0	11	45	Male	0.808337
0	11	46	Female	0.7817
0	11	46	Male	0.807137
0	11	47	Female	0.780427
0	11	47	Male	0.805927
0	11	48	Female	0.779147
0	11	48	Male	0.804708
0	11	49	Female	0.777863
0	11	49	Male	0.803479
0	11	50	Female	0.776572
0	11	50	Male	0.802241
0	11	51	Female	0.775277
0	11	51	Male	0.800994
0	11	52	Female	0.773976
0	11	52	Male	0.799737
0	11	53	Female	0.77267
0	11	53	Male	0.798471
0	11	54	Female	0.771359
0	11	54	Male	0.797195
0	11	55	Female	0.770043
0	11	55	Male	0.795911
0	11	56	Female	0.768721
0	11	56	Male	0.794617
0	11	57	Female	0.767395
0	11	57	Male	0.793313
0	11	58	Female	0.766065
0	11	58	Male	0.792001
0	11	59	Female	0.764729
0	11	59	Male	0.79068
0	11	60	Female	0.763389
0	11	60	Male	0.789349
0	11	61	Female	0.762045
0	11	61	Male	0.788009
0	11	62	Female	0.760696
0	11	62	Male	0.786661
0	11	63	Female	0.759343
0	11	63	Male	0.785303
0	11	64	Female	0.757985
0	11	64	Male	0.783936
0	11	65	Female	0.756624
0	11	65	Male	0.782561
0	11	66	Female	0.755259
0	11	66	Male	0.781176
0	11	67	Female	0.753889
0	11	67	Male	0.779783
0	11	68	Female	0.752516
0	11	68	Male	0.778381
0	11	69	Female	0.75114
0	11	69	Male	0.776971
0	11	70	Female	0.749759
0	11	70	Male	0.775551
0	11	71	Female	0.748376
0	11	71	Male	0.774124
0	11	72	Female	0.746989
0	11	72	Male	0.772687
0	11	73	Female	0.745598
0	11	73	Male	0.771243
0	11	74	Female	0.744205
0	11	74	Male	0.76979
0	11	75	Female	0.742808
0	11	75	Male	0.768329
0	11	76	Female	0.741409
0	11	76	Male	0.76686
0	11	77	Female	0.740007
0	11	77	Male	0.765382
0	11	78	Female	0.738602
0	11	78	Male	0.763897
0	11	79	Female	0.737194
0	11	79	Male	0.762403
0	11	80	Female	0.735784
0	11	80	Male	0.760902
0	11	81	Female	0.734372
0	11	81	Male	0.759393
0	11	82	Female	0.732957
0	11	82	Male	0.757877
0	11	83	Female	0.731541
0	11	83	Male	0.756353
0	11	84	Female	0.730122
0	11	84	Male	0.754821
0	11	85	Female	0.728701
0	11	85	Male	0.753282
0	11	86	Female	0.727279
0	11	86	Male	0.751736
0	11	87	Female	0.725855
0	11	87	Male	0.750182
0	11	88	Female	0.724429
0	11	88	Male	0.748622
0	11	89	Female	0.723002
0	11	89	Male	0.747055
0	11	90	Female	0.721574
0	11	90	Male	0.745481
0	11	91	Female	0.720144
0	11	91	Male	0.7439
0	11	92	Female	0.718713
0	11	92	Male	0.742312
0	11	93	Female	0.717281
0	11	93	Male	0.740718
0	11	94	Female	0.715849
0	11	94	Male	0.739118
0	11	95	Female	0.714415
0	11	95	Male	0.737512
0	11	96	Female	0.712981
0	11	96	Male	0.735899
0	11	97	Female	0.711547
0	11	97	Male	0.734281
0	11	98	Female	0.710111
0	11	98	Male	0.732656
0	11	99	Female	0.708676
0	11	99	Male	0.731026
0	12	18	Female	0.812332
0	12	18	Male	0.834882
0	12	19	Female	0.811263
0	12	19	Male	0.833954
0	12	20	Female	0.810188
0	12	20	Male	0.833018
0	12	21	Female	0.809107
0	12	21	Male	0.832074
0	12	22	Female	0.808019
0	12	22	Male	0.831121
0	12	23	Female	0.806925
0	12	23	Male	0.83016
0	12	24	Female	0.805824
0	12	24	Male	0.829191
0	12	25	Female	0.804717
0	12	25	Male	0.828213
0	12	26	Female	0.803604
0	12	26	Male	0.827227
0	12	27	Female	0.802485
0	12	27	Male	0.826233
0	12	28	Female	0.801359
0	12	28	Male	0.82523
0	12	29	Female	0.800227
0	12	29	Male	0.824218
0	12	30	Female	0.799088
0	12	30	Male	0.823198
0	12	31	Female	0.797944
0	12	31	Male	0.82217
0	12	32	Female	0.796793
0	12	32	Male	0.821133
0	12	33	Female	0.795637
[truncated: 99,025 more rows]

## Sheet: P-C
PHQ9	age	sex	P-C3
0	18	Female	0.913384
0	18	Male	0.93167
0	19	Female	0.912752
0	19	Male	0.931338
0	20	Female	0.912103
0	20	Male	0.930991
0	21	Female	0.911436
0	21	Male	0.930631
0	22	Female	0.910751
0	22	Male	0.930257
0	23	Female	0.910047
0	23	Male	0.929868
0	24	Female	0.909325
0	24	Male	0.929465
0	25	Female	0.908584
0	25	Male	0.929045
0	26	Female	0.907823
0	26	Male	0.928611
0	27	Female	0.907043
0	27	Male	0.92816
0	28	Female	0.906243
0	28	Male	0.927692
0	29	Female	0.905423
0	29	Male	0.927208
0	30	Female	0.904582
0	30	Male	0.926706
0	31	Female	0.90372
0	31	Male	0.926187
0	32	Female	0.902838
0	32	Male	0.92565
0	33	Female	0.901934
0	33	Male	0.925095
0	34	Female	0.901009
0	34	Male	0.924521
0	35	Female	0.900062
0	35	Male	0.923927
0	36	Female	0.899093
0	36	Male	0.923314
0	37	Female	0.898103
0	37	Male	0.922682
0	38	Female	0.897089
0	38	Male	0.922029
0	39	Female	0.896053
0	39	Male	0.921355
0	40	Female	0.894995
0	40	Male	0.920661
0	41	Female	0.893913
0	41	Male	0.919945
0	42	Female	0.892808
0	42	Male	0.919207
0	43	Female	0.89168
0	43	Male	0.918448
0	44	Female	0.890529
0	44	Male	0.917666
0	45	Female	0.889354
0	45	Male	0.916861
0	46	Female	0.888155
0	46	Male	0.916034
0	47	Female	0.886932
0	47	Male	0.915183
0	48	Female	0.885685
0	48	Male	0.914308
0	49	Female	0.884415
0	49	Male	0.913409
0	50	Female	0.88312
0	50	Male	0.912486
0	51	Female	0.881801
0	51	Male	0.911538
0	52	Female	0.880458
0	52	Male	0.910566
0	53	Female	0.87909
0	53	Male	0.909568
0	54	Female	0.877698
0	54	Male	0.908544
0	55	Female	0.876282
0	55	Male	0.907495
0	56	Female	0.874841
0	56	Male	0.90642
0	57	Female	0.873375
0	57	Male	0.905318
0	58	Female	0.871886
0	58	Male	0.90419
0	59	Female	0.870372
0	59	Male	0.903036
0	60	Female	0.868833
0	60	Male	0.901854
0	61	Female	0.867271
0	61	Male	0.900645
0	62	Female	0.865684
0	62	Male	0.899409
0	63	Female	0.864073
0	63	Male	0.898145
0	64	Female	0.862438
0	64	Male	0.896853
0	65	Female	0.860779
0	65	Male	0.895533
0	66	Female	0.859096
0	66	Male	0.894186
0	67	Female	0.857389
0	67	Male	0.89281
0	68	Female	0.855659
0	68	Male	0.891406
0	69	Female	0.853905
0	69	Male	0.889973
0	70	Female	0.852128
0	70	Male	0.888512
0	71	Female	0.850328
0	71	Male	0.887022
0	72	Female	0.848505
0	72	Male	0.885503
0	73	Female	0.846659
0	73	Male	0.883956
0	74	Female	0.844791
0	74	Male	0.88238
0	75	Female	0.842901
0	75	Male	0.880775
0	76	Female	0.840988
0	76	Male	0.879141
0	77	Female	0.839054
0	77	Male	0.877478
0	78	Female	0.837098
0	78	Male	0.875786
0	79	Female	0.835121
0	79	Male	0.874065
0	80	Female	0.833123
0	80	Male	0.872316
0	81	Female	0.831105
0	81	Male	0.870538
0	82	Female	0.829065
0	82	Male	0.868731
0	83	Female	0.827006
0	83	Male	0.866895
0	84	Female	0.824927
0	84	Male	0.865031
0	85	Female	0.822829
0	85	Male	0.863139
0	86	Female	0.820711
0	86	Male	0.861218
0	87	Female	0.818575
0	87	Male	0.859269
0	88	Female	0.816421
0	88	Male	0.857291
0	89	Female	0.814248
0	89	Male	0.855286
0	90	Female	0.812058
0	90	Male	0.853254
0	91	Female	0.80985
0	91	Male	0.851193
0	92	Female	0.807625
0	92	Male	0.849106
0	93	Female	0.805384
0	93	Male	0.846991
0	94	Female	0.803127
0	94	Male	0.844849
0	95	Female	0.800854
0	95	Male	0.842681
0	96	Female	0.798566
0	96	Male	0.840486
0	97	Female	0.796262
0	97	Male	0.838265
0	98	Female	0.793945
0	98	Male	0.836018
0	99	Female	0.791613
0	99	Male	0.833746
1	18	Female	0.892922
1	18	Male	0.915175
1	19	Female	0.892028
1	19	Male	0.914614
1	20	Female	0.891113
1	20	Male	0.914034
1	21	Female	0.890178
1	21	Male	0.913436
1	22	Female	0.889223
1	22	Male	0.91282
1	23	Female	0.888248
1	23	Male	0.912185
1	24	Female	0.887251
1	24	Male	0.91153
1	25	Female	0.886233
1	25	Male	0.910856
1	26	Female	0.885195
1	26	Male	0.910162
1	27	Female	0.884135
1	27	Male	0.909447
1	28	Female	0.883053
1	28	Male	0.908712
1	29	Female	0.88195
1	29	Male	0.907956
1	30	Female	0.880825
1	30	Male	0.907179
1	31	Female	0.879679
1	31	Male	0.90638
1	32	Female	0.87851
1	32	Male	0.90556
1	33	Female	0.87732
1	33	Male	0.904717
1	34	Female	0.876107
1	34	Male	0.903852
1	35	Female	0.874872
1	35	Male	0.902964
1	36	Female	0.873615
1	36	Male	0.902053
1	37	Female	0.872336
1	37	Male	0.901118
1	38	Female	0.871034
1	38	Male	0.90016
1	39	Female	0.86971
1	39	Male	0.899178
1	40	Female	0.868364
1	40	Male	0.898172
1	41	Female	0.866995
1	41	Male	0.897142
1	42	Female	0.865604
1	42	Male	0.896087
1	43	Female	0.86419
1	43	Male	0.895007
1	44	Female	0.862754
1	44	Male	0.893903
1	45	Female	0.861296
1	45	Male	0.892773
1	46	Female	0.859816
1	46	Male	0.891618
1	47	Female	0.858313
1	47	Male	0.890437
1	48	Female	0.856789
1	48	Male	0.88923
1	49	Female	0.855242
1	49	Male	0.887998
1	50	Female	0.853674
1	50	Male	0.886739
1	51	Female	0.852083
1	51	Male	0.885454
1	52	Female	0.850471
1	52	Male	0.884143
1	53	Female	0.848838
1	53	Male	0.882806
1	54	Female	0.847183
1	54	Male	0.881441
1	55	Female	0.845507
1	55	Male	0.880051
1	56	Female	0.843811
1	56	Male	0.878633
1	57	Female	0.842093
1	57	Male	0.877189
1	58	Female	0.840354
1	58	Male	0.875718
1	59	Female	0.838595
1	59	Male	0.87422
1	60	Female	0.836816
1	60	Male	0.872695
1	61	Female	0.835017
1	61	Male	0.871143
1	62	Female	0.833198
1	62	Male	0.869564
1	63	Female	0.83136
1	63	Male	0.867959
1	64	Female	0.829502
1	64	Male	0.866326
1	65	Female	0.827626
1	65	Male	0.864667
1	66	Female	0.82573
1	66	Male	0.862981
1	67	Female	0.823817
1	67	Male	0.861268
1	68	Female	0.821885
1	68	Male	0.859528
1	69	Female	0.819935
1	69	Male	0.857762
1	70	Female	0.817967
1	70	Male	0.855969
1	71	Female	0.815983
1	71	Male	0.85415
1	72	Female	0.813981
1	72	Male	0.852305
1	73	Female	0.811963
1	73	Male	0.850434
1	74	Female	0.809929
1	74	Male	0.848536
1	75	Female	0.807879
1	75	Male	0.846613
1	76	Female	0.805813
1	76	Male	0.844665
1	77	Female	0.803732
1	77	Male	0.842691
1	78	Female	0.801637
1	78	Male	0.840691
1	79	Female	0.799526
1	79	Male	0.838667
1	80	Female	0.797402
1	80	Male	0.836618
1	81	Female	0.795264
1	81	Male	0.834545
1	82	Female	0.793113
1	82	Male	0.832447
1	83	Female	0.790949
1	83	Male	0.830325
1	84	Female	0.788772
1	84	Male	0.828179
1	85	Female	0.786583
1	85	Male	0.82601
1	86	Female	0.784382
1	86	Male	0.823818
1	87	Female	0.78217
1	87	Male	0.821603
1	88	Female	0.779947
1	88	Male	0.819365
1	89	Female	0.777714
1	89	Male	0.817105
1	90	Female	0.77547
1	90	Male	0.814822
1	91	Female	0.773217
1	91	Male	0.812519
1	92	Female	0.770954
1	92	Male	0.810194
1	93	Female	0.768682
1	93	Male	0.807847
1	94	Female	0.766402
1	94	Male	0.805481
1	95	Female	0.764113
1	95	Male	0.803094
1	96	Female	0.761817
1	96	Male	0.800687
1	97	Female	0.759514
1	97	Male	0.798261
1	98	Female	0.757203
1	98	Male	0.795815
1	99	Female	0.754886
1	99	Male	0.793351
2	18	Female	0.870212
2	18	Male	0.895815
2	19	Female	0.869071
2	19	Male	0.894994
2	20	Female	0.867911
2	20	Male	0.894153
2	21	Female	0.86673
2	21	Male	0.893292
2	22	Female	0.865529
2	22	Male	0.892408
2	23	Female	0.864308
2	23	Male	0.891504
2	24	Female	0.863067
2	24	Male	0.890577
2	25	Female	0.861806
2	25	Male	0.889629
2	26	Female	0.860525
2	26	Male	0.888659
2	27	Female	0.859223
2	27	Male	0.887666
2	28	Female	0.857901
2	28	Male	0.88665
2	29	Female	0.856559
2	29	Male	0.885612
2	30	Female	0.855198
2	30	Male	0.884551
2	31	Female	0.853816
2	31	Male	0.883466
2	32	Female	0.852414
2	32	Male	0.882359
2	33	Female	0.850992
2	33	Male	0.881227
2	34	Female	0.84955
2	34	Male	0.880073
2	35	Female	0.848089
2	35	Male	0.878894
2	36	Female	0.846608
2	36	Male	0.877691
2	37	Female	0.845108
2	37	Male	0.876465
2	38	Female	0.843588
2	38	Male	0.875214
2	39	Female	0.842049
2	39	Male	0.873939
2	40	Female	0.840492
2	40	Male	0.87264
2	41	Female	0.838915
2	41	Male	0.871316
2	42	Female	0.837319
2	42	Male	0.869968
2	43	Female	0.835705
2	43	Male	0.868595
2	44	Female	0.834072
2	44	Male	0.867198
2	45	Female	0.832421
2	45	Male	0.865777
2	46	Female	0.830752
2	46	Male	0.86433
2	47	Female	0.829066
2	47	Male	0.862859
2	48	Female	0.827361
2	48	Male	0.861364
2	49	Female	0.82564
2	49	Male	0.859843
2	50	Female	0.823901
2	50	Male	0.858299
2	51	Female	0.822146
2	51	Male	0.85673
2	52	Female	0.820374
2	52	Male	0.855136
2	53	Female	0.818585
2	53	Male	0.853518
2	54	Female	0.816781
2	54	Male	0.851875
2	55	Female	0.814961
2	55	Male	0.850209
2	56	Female	0.813125
2	56	Male	0.848518
2	57	Female	0.811274
2	57	Male	0.846803
2	58	Female	0.809408
2	58	Male	0.845065
2	59	Female	0.807528
2	59	Male	0.843302
2	60	Female	0.805633
2	60	Male	0.841516
2	61	Female	0.803724
2	61	Male	0.839707
2	62	Female	0.801802
2	62	Male	0.837874
2	63	Female	0.799866
2	63	Male	0.836018
2	64	Female	0.797917
2	64	Male	0.834139
2	65	Female	0.795956
2	65	Male	0.832238
2	66	Female	0.793982
2	66	Male	0.830314
2	67	Female	0.791996
2	67	Male	0.828367
2	68	Female	0.789999
2	68	Male	0.826399
2	69	Female	0.78799
2	69	Male	0.824408
2	70	Female	0.785971
2	70	Male	0.822396
2	71	Female	0.783941
2	71	Male	0.820363
2	72	Female	0.7819
2	72	Male	0.818309
2	73	Female	0.77985
2	73	Male	0.816234
2	74	Female	0.77779
2	74	Male	0.814138
2	75	Female	0.775721
2	75	Male	0.812022
2	76	Female	0.773644
2	76	Male	0.809886
2	77	Female	0.771557
2	77	Male	0.807731
2	78	Female	0.769463
2	78	Male	0.805556
2	79	Female	0.767361
2	79	Male	0.803362
2	80	Female	0.765252
2	80	Male	0.801149
2	81	Female	0.763136
2	81	Male	0.798918
2	82	Female	0.761014
2	82	Male	0.796669
2	83	Female	0.758885
2	83	Male	0.794403
2	84	Female	0.75675
2	84	Male	0.792119
2	85	Female	0.75461
2	85	Male	0.789818
2	86	Female	0.752464
2	86	Male	0.7875
2	87	Female	0.750314
2	87	Male	0.785166
2	88	Female	0.74816
2	88	Male	0.782816
2	89	Female	0.746001
2	89	Male	0.780451
2	90	Female	0.743839
2	90	Male	0.77807
2	91	Female	0.741673
2	91	Male	0.775674
2	92	Female	0.739504
2	92	Male	0.773265
2	93	Female	0.737333
2	93	Male	0.770841
2	94	Female	0.735159
2	94	Male	0.768403
2	95	Female	0.732984
2	95	Male	0.765952
2	96	Female	0.730806
2	96	Male	0.763488
2	97	Female	0.728628
2	97	Male	0.761012
2	98	Female	0.726448
2	98	Male	0.758523
2	99	Female	0.724268
2	99	Male	0.756023
3	18	Female	0.846834
3	18	Male	0.874487
3	19	Female	0.845508
3	19	Male	0.873422
3	20	Female	0.844164
3	20	Male	0.872337
3	21	Female	0.842803
3	21	Male	0.87123
3	22	Female	0.841424
3	22	Male	0.870102
3	23	Female	0.840028
3	23	Male	0.868953
3	24	Female	0.838615
3	24	Male	0.867781
3	25	Female	0.837185
3	25	Male	0.866589
3	26	Female	0.835738
3	26	Male	0.865374
3	27	Female	0.834275
3	27	Male	0.864137
3	28	Female	0.832795
3	28	Male	0.862879
3	29	Female	0.831298
3	29	Male	0.861599
3	30	Female	0.829785
3	30	Male	0.860296
3	31	Female	0.828256
3	31	Male	0.858972
3	32	Female	0.826711
3	32	Male	0.857626
3	33	Female	0.825151
3	33	Male	0.856257
3	34	Female	0.823575
3	34	Male	0.854867
3	35	Female	0.821984
3	35	Male	0.853455
3	36	Female	0.820377
3	36	Male	0.85202
3	37	Female	0.818756
3	37	Male	0.850564
3	38	Female	0.81712
3	38	Male	0.849086
3	39	Female	0.815469
3	39	Male	0.847586
3	40	Female	0.813805
3	40	Male	0.846064
3	41	Female	0.812126
3	41	Male	0.84452
3	42	Female	0.810434
3	42	Male	0.842955
3	43	Female	0.808728
3	43	Male	0.841369
3	44	Female	0.807009
3	44	Male	0.83976
3	45	Female	0.805278
3	45	Male	0.838131
3	46	Female	0.803533
3	46	Male	0.836481
3	47	Female	0.801777
3	47	Male	0.834809
3	48	Female	0.800008
3	48	Male	0.833116
3	49	Female	0.798227
3	49	Male	0.831403
3	50	Female	0.796435
3	50	Male	0.829669
3	51	Female	0.794632
3	51	Male	0.827915
3	52	Female	0.792818
3	52	Male	0.826141
3	53	Female	0.790993
3	53	Male	0.824346
3	54	Female	0.789158
3	54	Male	0.822532
3	55	Female	0.787313
3	55	Male	0.820698
3	56	Female	0.785458
3	56	Male	0.818844
3	57	Female	0.783594
3	57	Male	0.816972
3	58	Female	0.78172
3	58	Male	0.81508
3	59	Female	0.779838
3	59	Male	0.81317
3	60	Female	0.777948
3	60	Male	0.811241
3	61	Female	0.776049
3	61	Male	0.809294
3	62	Female	0.774143
3	62	Male	0.807329
3	63	Female	0.772229
3	63	Male	0.805346
3	64	Female	0.770308
3	64	Male	0.803346
3	65	Female	0.768381
3	65	Male	0.801328
3	66	Female	0.766446
3	66	Male	0.799294
3	67	Female	0.764506
3	67	Male	0.797243
3	68	Female	0.762559
3	68	Male	0.795175
3	69	Female	0.760607
3	69	Male	0.793092
3	70	Female	0.75865
3	70	Male	0.790993
3	71	Female	0.756688
3	71	Male	0.788878
3	72	Female	0.754721
3	72	Male	0.786749
3	73	Female	0.75275
3	73	Male	0.784604
3	74	Female	0.750775
3	74	Male	0.782445
3	75	Female	0.748797
3	75	Male	0.780272
3	76	Female	0.746815
3	76	Male	0.778085
3	77	Female	0.74483
3	77	Male	0.775885
3	78	Female	0.742842
3	78	Male	0.773671
3	79	Female	0.740852
3	79	Male	0.771444
3	80	Female	0.73886
3	80	Male	0.769205
3	81	Female	0.736866
3	81	Male	0.766954
3	82	Female	0.73487
3	82	Male	0.764691
3	83	Female	0.732873
3	83	Male	0.762416
3	84	Female	0.730876
3	84	Male	0.76013
3	85	Female	0.728877
3	85	Male	0.757833
3	86	Female	0.726878
3	86	Male	0.755526
3	87	Female	0.724879
3	87	Male	0.753209
3	88	Female	0.722881
3	88	Male	0.750881
3	89	Female	0.720883
3	89	Male	0.748545
3	90	Female	0.718885
3	90	Male	0.746199
3	91	Female	0.716889
3	91	Male	0.743844
3	92	Female	0.714894
3	92	Male	0.741481
3	93	Female	0.7129
3	93	Male	0.739109
3	94	Female	0.710908
3	94	Male	0.73673
3	95	Female	0.708918
3	95	Male	0.734344
3	96	Female	0.706931
3	96	Male	0.73195
3	97	Female	0.704946
3	97	Male	0.72955
3	98	Female	0.702964
3	98	Male	0.727143
3	99	Female	0.700985
3	99	Male	0.72473
4	18	Female	0.824591
4	18	Male	0.852716
4	19	Female	0.823163
4	19	Male	0.851465
4	20	Female	0.82172
4	20	Male	0.850194
4	21	Female	0.820265
4	21	Male	0.848904
4	22	Female	0.818795
4	22	Male	0.847594
4	23	Female	0.817313
4	23	Male	0.846265
4	24	Female	0.815818
4	24	Male	0.844917
4	25	Female	0.81431
4	25	Male	0.84355
4	26	Female	0.81279
4	26	Male	0.842163
4	27	Female	0.811257
4	27	Male	0.840758
4	28	Female	0.809712
4	28	Male	0.839333
4	29	Female	0.808155
4	29	Male	0.83789
4	30	Female	0.806586
4	30	Male	0.836427
4	31	Female	0.805006
4	31	Male	0.834946
4	32	Female	0.803414
4	32	Male	0.833446
4	33	Female	0.801812
4	33	Male	0.831927
4	34	Female	0.800199
4	34	Male	0.83039
4	35	Female	0.798575
4	35	Male	0.828835
4	36	Female	0.796941
4	36	Male	0.827261
4	37	Female	0.795297
4	37	Male	0.825669
4	38	Female	0.793643
4	38	Male	0.824059
4	39	Female	0.791979
4	39	Male	0.822432
4	40	Female	0.790306
4	40	Male	0.820787
4	41	Female	0.788624
4	41	Male	0.819124
4	42	Female	0.786934
4	42	Male	0.817444
4	43	Female	0.785235
4	43	Male	0.815747
4	44	Female	0.783527
4	44	Male	0.814033
4	45	Female	0.781812
4	45	Male	0.812302
4	46	Female	0.780089
4	46	Male	0.810555
4	47	Female	0.778358
4	47	Male	0.808791
4	48	Female	0.77662
4	48	Male	0.807011
4	49	Female	0.774876
4	49	Male	0.805216
4	50	Female	0.773124
4	50	Male	0.803404
4	51	Female	0.771367
4	51	Male	0.801577
4	52	Female	0.769603
4	52	Male	0.799735
4	53	Female	0.767833
4	53	Male	0.797878
4	54	Female	0.766058
4	54	Male	0.796006
4	55	Female	0.764278
4	55	Male	0.794119
4	56	Female	0.762493
4	56	Male	0.792219
4	57	Female	0.760702
4	57	Male	0.790304
4	58	Female	0.758908
4	58	Male	0.788375
4	59	Female	0.757109
4	59	Male	0.786433
4	60	Female	0.755306
4	60	Male	0.784478
4	61	Female	0.7535
4	61	Male	0.782509
4	62	Female	0.751691
4	62	Male	0.780528
4	63	Female	0.749878
4	63	Male	0.778535
4	64	Female	0.748062
4	64	Male	0.776529
4	65	Female	0.746244
4	65	Male	0.774512
4	66	Female	0.744424
4	66	Male	0.772482
4	67	Female	0.742601
4	67	Male	0.770442
4	68	Female	0.740777
4	68	Male	0.76839
4	69	Female	0.738951
4	69	Male	0.766328
4	70	Female	0.737124
4	70	Male	0.764255
4	71	Female	0.735295
4	71	Male	0.762172
4	72	Female	0.733466
4	72	Male	0.760079
4	73	Female	0.731637
4	73	Male	0.757977
4	74	Female	0.729807
4	74	Male	0.755865
4	75	Female	0.727977
4	75	Male	0.753744
4	76	Female	0.726148
4	76	Male	0.751614
4	77	Female	0.724318
4	77	Male	0.749476
4	78	Female	0.72249
4	78	Male	0.74733
4	79	Female	0.720662
4	79	Male	0.745176
4	80	Female	0.718836
4	80	Male	0.743014
4	81	Female	0.71701
4	81	Male	0.740845
4	82	Female	0.715187
4	82	Male	0.738669
4	83	Female	0.713365
4	83	Male	0.736487
4	84	Female	0.711545
4	84	Male	0.734298
4	85	Female	0.709727
4	85	Male	0.732103
4	86	Female	0.707912
4	86	Male	0.729902
4	87	Female	0.7061
4	87	Male	0.727695
4	88	Female	0.70429
4	88	Male	0.725483
4	89	Female	0.702483
4	89	Male	0.723266
4	90	Female	0.70068
4	90	Male	0.721045
4	91	Female	0.69888
4	91	Male	0.718819
4	92	Female	0.697084
4	92	Male	0.716589
4	93	Female	0.695291
4	93	Male	0.714355
4	94	Female	0.693503
4	94	Male	0.712117
4	95	Female	0.691718
4	95	Male	0.709877
4	96	Female	0.689938
4	96	Male	0.707633
4	97	Female	0.688163
4	97	Male	0.705386
4	98	Female	0.686392
4	98	Male	0.703137
4	99	Female	0.684626
4	99	Male	0.700886
5	18	Female	0.804893
5	18	Male	0.832203
5	19	Female	0.80344
5	19	Male	0.830843
5	20	Female	0.801977
5	20	Male	0.829466
5	21	Female	0.800504
5	21	Male	0.828074
5	22	Female	0.799022
5	22	Male	0.826665
5	23	Female	0.797531
5	23	Male	0.825241
5	24	Female	0.796031
5	24	Male	0.8238
5	25	Female	0.794522
5	25	Male	0.822345
5	26	Female	0.793004
5	26	Male	0.820873
5	27	Female	0.791478
5	27	Male	0.819386
5	28	Female	0.789944
5	28	Male	0.817884
5	29	Female	0.788402
5	29	Male	0.816367
5	30	Female	0.786852
5	30	Male	0.814835
5	31	Female	0.785295
5	31	Male	0.813287
5	32	Female	0.78373
5	32	Male	0.811726
5	33	Female	0.782158
5	33	Male	0.810149
5	34	Female	0.78058
5	34	Male	0.808558
5	35	Female	0.778995
5	35	Male	0.806953
5	36	Female	0.777403
5	36	Male	0.805334
5	37	Female	0.775805
5	37	Male	0.803701
5	38	Female	0.774201
5	38	Male	0.802054
5	39	Female	0.772592
5	39	Male	0.800394
5	40	Female	0.770976
5	40	Male	0.79872
5	41	Female	0.769356
5	41	Male	0.797033
5	42	Female	0.767731
5	42	Male	0.795333
5	43	Female	0.7661
5	43	Male	0.79362
5	44	Female	0.764465
5	44	Male	0.791895
5	45	Female	0.762826
5	45	Male	0.790158
5	46	Female	0.761183
5	46	Male	0.788408
5	47	Female	0.759535
5	47	Male	0.786646
5	48	Female	0.757884
5	48	Male	0.784873
5	49	Female	0.75623
5	49	Male	0.783088
5	50	Female	0.754572
5	50	Male	0.781291
5	51	Female	0.752911
5	51	Male	0.779484
5	52	Female	0.751248
5	52	Male	0.777666
5	53	Female	0.749582
5	53	Male	0.775837
5	54	Female	0.747913
5	54	Male	0.773998
5	55	Female	0.746242
5	55	Male	0.772148
5	56	Female	0.74457
5	56	Male	0.770289
5	57	Female	0.742896
5	57	Male	0.768419
5	58	Female	0.74122
5	58	Male	0.766541
5	59	Female	0.739543
5	59	Male	0.764653
5	60	Female	0.737865
5	60	Male	0.762756
5	61	Female	0.736186
5	61	Male	0.76085
5	62	Female	0.734506
5	62	Male	0.758936
5	63	Female	0.732826
5	63	Male	0.757013
5	64	Female	0.731146
5	64	Male	0.755083
5	65	Female	0.729465
5	65	Male	0.753144
5	66	Female	0.727785
5	66	Male	0.751198
5	67	Female	0.726105
5	67	Male	0.749245
5	68	Female	0.724426
5	68	Male	0.747284
5	69	Female	0.722748
5	69	Male	0.745317
5	70	Female	0.72107
5	70	Male	0.743343
5	71	Female	0.719394
5	71	Male	0.741363
5	72	Female	0.717719
5	72	Male	0.739377
5	73	Female	0.716045
5	73	Male	0.737384
5	74	Female	0.714374
5	74	Male	0.735386
5	75	Female	0.712704
5	75	Male	0.733383
5	76	Female	0.711036
5	76	Male	0.731375
5	77	Female	0.70937
5	77	Male	0.729361
5	78	Female	0.707707
5	78	Male	0.727343
5	79	Female	0.706046
5	79	Male	0.725321
5	80	Female	0.704389
5	80	Male	0.723294
5	81	Female	0.702734
5	81	Male	0.721264
5	82	Female	0.701082
5	82	Male	0.71923
5	83	Female	0.699433
5	83	Male	0.717192
5	84	Female	0.697788
5	84	Male	0.715151
5	85	Female	0.696146
5	85	Male	0.713107
5	86	Female	0.694508
5	86	Male	0.711061
5	87	Female	0.692874
5	87	Male	0.709012
5	88	Female	0.691244
5	88	Male	0.70696
5	89	Female	0.689618
5	89	Male	0.704907
5	90	Female	0.687996
5	90	Male	0.702851
5	91	Female	0.686379
5	91	Male	0.700795
5	92	Female	0.684766
5	92	Male	0.698737
5	93	Female	0.683158
5	93	Male	0.696677
5	94	Female	0.681555
5	94	Male	0.694617
5	95	Female	0.679957
5	95	Male	0.692556
5	96	Female	0.678364
5	96	Male	0.690495
5	97	Female	0.676776
5	97	Male	0.688433
5	98	Female	0.675193
5	98	Male	0.686372
5	99	Female	0.673616
5	99	Male	0.684311
6	18	Female	0.788333
6	18	Male	0.814252
6	19	Female	0.786906
6	19	Male	0.812857
6	20	Female	0.785473
6	20	Male	0.811448
6	21	Female	0.784032
6	21	Male	0.810027
6	22	Female	0.782585
6	22	Male	0.808594
6	23	Female	0.781132
6	23	Male	0.807148
6	24	Female	0.779673
6	24	Male	0.80569
6	25	Female	0.778208
6	25	Male	0.804219
6	26	Female	0.776738
6	26	Male	0.802737
6	27	Female	0.775262
6	27	Male	0.801242
6	28	Female	0.77378
6	28	Male	0.799736
6	29	Female	0.772293
6	29	Male	0.798218
6	30	Female	0.770802
6	30	Male	0.796688
6	31	Female	0.769305
6	31	Male	0.795147
6	32	Female	0.767804
6	32	Male	0.793595
6	33	Female	0.766299
6	33	Male	0.792032
6	34	Female	0.764789
6	34	Male	0.790458
6	35	Female	0.763276
6	35	Male	0.788873
6	36	Female	0.761758
6	36	Male	0.787278
6	37	Female	0.760237
6	37	Male	0.785672
6	38	Female	0.758712
6	38	Male	0.784056
6	39	Female	0.757184
6	39	Male	0.78243
6	40	Female	0.755653
6	40	Male	0.780794
6	41	Female	0.754119
6	41	Male	0.779148
6	42	Female	0.752582
6	42	Male	0.777493
6	43	Female	0.751043
6	43	Male	0.775828
6	44	Female	0.749501
6	44	Male	0.774154
6	45	Female	0.747957
6	45	Male	0.772471
6	46	Female	0.746411
6	46	Male	0.770779
6	47	Female	0.744863
6	47	Male	0.769079
6	48	Female	0.743314
6	48	Male	0.76737
6	49	Female	0.741763
6	49	Male	0.765653
6	50	Female	0.740211
6	50	Male	0.763928
6	51	Female	0.738657
6	51	Male	0.762195
6	52	Female	0.737103
6	52	Male	0.760454
6	53	Female	0.735548
6	53	Male	0.758705
6	54	Female	0.733992
6	54	Male	0.75695
6	55	Female	0.732436
6	55	Male	0.755187
6	56	Female	0.730879
6	56	Male	0.753417
6	57	Female	0.729323
6	57	Male	0.751641
6	58	Female	0.727766
6	58	Male	0.749858
6	59	Female	0.72621
6	59	Male	0.748069
6	60	Female	0.724654
6	60	Male	0.746273
6	61	Female	0.723099
6	61	Male	0.744472
6	62	Female	0.721545
6	62	Male	0.742665
6	63	Female	0.719991
6	63	Male	0.740852
6	64	Female	0.718438
6	64	Male	0.739034
6	65	Female	0.716887
6	65	Male	0.737211
6	66	Female	0.715337
6	66	Male	0.735383
6	67	Female	0.713788
6	67	Male	0.733551
6	68	Female	0.712241
6	68	Male	0.731714
6	69	Female	0.710696
6	69	Male	0.729872
6	70	Female	0.709153
6	70	Male	0.728026
6	71	Female	0.707612
6	71	Male	0.726177
6	72	Female	0.706073
6	72	Male	0.724323
6	73	Female	0.704537
6	73	Male	0.722467
6	74	Female	0.703003
6	74	Male	0.720607
6	75	Female	0.701471
6	75	Male	0.718743
6	76	Female	0.699943
6	76	Male	0.716877
6	77	Female	0.698417
6	77	Male	0.715008
6	78	Female	0.696895
6	78	Male	0.713137
6	79	Female	0.695375
6	79	Male	0.711264
6	80	Female	0.693859
6	80	Male	0.709388
6	81	Female	0.692346
6	81	Male	0.70751
6	82	Female	0.690837
6	82	Male	0.705631
6	83	Female	0.689332
6	83	Male	0.70375
6	84	Female	0.68783
6	84	Male	0.701868
6	85	Female	0.686332
6	85	Male	0.699985
6	86	Female	0.684838
6	86	Male	0.698101
6	87	Female	0.683349
6	87	Male	0.696216
6	88	Female	0.681863
6	88	Male	0.694331
6	89	Female	0.680382
6	89	Male	0.692446
6	90	Female	0.678906
6	90	Male	0.69056
6	91	Female	0.677433
6	91	Male	0.688674
6	92	Female	0.675966
6	92	Male	0.686789
6	93	Female	0.674503
6	93	Male	0.684904
6	94	Female	0.673045
6	94	Male	0.68302
6	95	Female	0.671592
6	95	Male	0.681137
6	96	Female	0.670144
6	96	Male	0.679255
6	97	Female	0.668701
6	97	Male	0.677374
6	98	Female	0.667263
6	98	Male	0.675494
6	99	Female	0.665831
6	99	Male	0.673616
7	18	Female	0.77463
7	18	Male	0.799394
7	19	Female	0.773248
7	19	Male	0.798014
7	20	Female	0.771861
7	20	Male	0.796623
7	21	Female	0.770469
7	21	Male	0.795222
7	22	Female	0.769072
7	22	Male	0.793812
7	23	Female	0.767671
7	23	Male	0.792391
7	24	Female	0.766266
7	24	Male	0.790961
7	25	Female	0.764857
7	25	Male	0.789521
7	26	Female	0.763444
7	26	Male	0.788071
7	27	Female	0.762027
7	27	Male	0.786613
7	28	Female	0.760606
7	28	Male	0.785145
7	29	Female	0.759182
7	29	Male	0.783668
7	30	Female	0.757754
7	30	Male	0.782182
7	31	Female	0.756323
7	31	Male	0.780687
7	32	Female	0.754889
7	32	Male	0.779183
7	33	Female	0.753452
7	33	Male	0.777671
7	34	Female	0.752013
7	34	Male	0.77615
7	35	Female	0.750571
7	35	Male	0.774622
7	36	Female	0.749126
7	36	Male	0.773085
7	37	Female	0.747679
7	37	Male	0.771539
7	38	Female	0.74623
7	38	Male	0.769986
7	39	Female	0.744779
7	39	Male	0.768426
7	40	Female	0.743326
7	40	Male	0.766857
7	41	Female	0.741871
7	41	Male	0.765282
7	42	Female	0.740415
7	42	Male	0.763699
7	43	Female	0.738957
7	43	Male	0.762108
7	44	Female	0.737498
7	44	Male	0.760511
7	45	Female	0.736038
7	45	Male	0.758907
7	46	Female	0.734577
7	46	Male	0.757297
7	47	Female	0.733115
7	47	Male	0.75568
7	48	Female	0.731653
7	48	Male	0.754056
7	49	Female	0.73019
7	49	Male	0.752426
7	50	Female	0.728726
7	50	Male	0.75079
7	51	Female	0.727262
7	51	Male	0.749149
7	52	Female	0.725799
7	52	Male	0.747501
7	53	Female	0.724335
7	53	Male	0.745848
7	54	Female	0.722871
7	54	Male	0.74419
7	55	Female	0.721408
7	55	Male	0.742527
7	56	Female	0.719945
7	56	Male	0.740858
7	57	Female	0.718483
7	57	Male	0.739184
7	58	Female	0.717021
7	58	Male	0.737506
7	59	Female	0.71556
7	59	Male	0.735823
7	60	Female	0.7141
7	60	Male	0.734136
7	61	Female	0.712642
7	61	Male	0.732445
7	62	Female	0.711184
7	62	Male	0.730749
7	63	Female	0.709728
7	63	Male	0.72905
7	64	Female	0.708273
7	64	Male	0.727347
7	65	Female	0.70682
7	65	Male	0.72564
7	66	Female	0.705369
7	66	Male	0.72393
7	67	Female	0.703919
7	67	Male	0.722217
7	68	Female	0.702472
7	68	Male	0.720501
7	69	Female	0.701026
7	69	Male	0.718782
7	70	Female	0.699583
7	70	Male	0.717061
7	71	Female	0.698142
7	71	Male	0.715336
7	72	Female	0.696703
7	72	Male	0.71361
7	73	Female	0.695267
7	73	Male	0.711881
7	74	Female	0.693834
7	74	Male	0.710151
7	75	Female	0.692403
7	75	Male	0.708418
7	76	Female	0.690975
7	76	Male	0.706684
7	77	Female	0.68955
7	77	Male	0.704949
7	78	Female	0.688128
7	78	Male	0.703212
7	79	Female	0.686709
7	79	Male	0.701475
7	80	Female	0.685294
7	80	Male	0.699736
7	81	Female	0.683882
7	81	Male	0.697996
7	82	Female	0.682473
7	82	Male	0.696256
7	83	Female	0.681068
7	83	Male	0.694516
7	84	Female	0.679666
7	84	Male	0.692775
7	85	Female	0.678268
7	85	Male	0.691034
7	86	Female	0.676874
7	86	Male	0.689294
7	87	Female	0.675483
7	87	Male	0.687553
7	88	Female	0.674097
7	88	Male	0.685813
7	89	Female	0.672715
7	89	Male	0.684074
7	90	Female	0.671336
7	90	Male	0.682335
7	91	Female	0.669962
7	91	Male	0.680598
7	92	Female	0.668592
7	92	Male	0.678861
7	93	Female	0.667226
7	93	Male	0.677126
7	94	Female	0.665865
7	94	Male	0.675392
7	95	Female	0.664508
7	95	Male	0.67366
7	96	Female	0.663156
7	96	Male	0.671929
7	97	Female	0.661808
7	97	Male	0.670201
7	98	Female	0.660465
7	98	Male	0.668474
7	99	Female	0.659126
7	99	Male	0.66675
8	18	Female	0.76288
8	18	Male	0.787352
8	19	Female	0.761534
8	19	Male	0.786006
8	20	Female	0.760185
8	20	Male	0.784652
8	21	Female	0.758833
8	21	Male	0.783289
8	22	Female	0.757476
8	22	Male	0.781918
8	23	Female	0.756116
8	23	Male	0.780539
8	24	Female	0.754753
8	24	Male	0.779152
8	25	Female	0.753387
8	25	Male	0.777757
8	26	Female	0.752017
8	26	Male	0.776354
8	27	Female	0.750645
8	27	Male	0.774944
8	28	Female	0.749269
8	28	Male	0.773525
8	29	Female	0.747891
8	29	Male	0.7721
8	30	Female	0.746511
8	30	Male	0.770666
8	31	Female	0.745127
8	31	Male	0.769226
8	32	Female	0.743742
8	32	Male	0.767778
8	33	Female	0.742354
8	33	Male	0.766323
8	34	Female	0.740964
8	34	Male	0.764862
8	35	Female	0.739573
8	35	Male	0.763393
8	36	Female	0.738179
8	36	Male	0.761917
8	37	Female	0.736784
8	37	Male	0.760436
8	38	Female	0.735387
8	38	Male	0.758947
8	39	Female	0.733989
8	39	Male	0.757452
8	40	Female	0.732589
8	40	Male	0.755951
8	41	Female	0.731188
8	41	Male	0.754444
8	42	Female	0.729787
8	42	Male	0.752931
8	43	Female	0.728384
8	43	Male	0.751412
8	44	Female	0.72698
8	44	Male	0.749887
8	45	Female	0.725576
8	45	Male	0.748357
8	46	Female	0.724171
8	46	Male	0.746821
8	47	Female	0.722766
8	47	Male	0.74528
8	48	Female	0.72136
8	48	Male	0.743734
8	49	Female	0.719954
8	49	Male	0.742183
8	50	Female	0.718549
8	50	Male	0.740627
8	51	Female	0.717143
8	51	Male	0.739066
8	52	Female	0.715737
8	52	Male	0.7375
8	53	Female	0.714332
8	53	Male	0.735931
8	54	Female	0.712927
8	54	Male	0.734356
8	55	Female	0.711522
8	55	Male	0.732778
8	56	Female	0.710118
8	56	Male	0.731196
8	57	Female	0.708715
8	57	Male	0.729609
8	58	Female	0.707313
8	58	Male	0.728019
8	59	Female	0.705911
8	59	Male	0.726426
8	60	Female	0.704511
8	60	Male	0.724829
8	61	Female	0.703112
8	61	Male	0.723228
8	62	Female	0.701714
8	62	Male	0.721625
8	63	Female	0.700318
8	63	Male	0.720019
8	64	Female	0.698923
8	64	Male	0.718409
8	65	Female	0.697529
8	65	Male	0.716798
8	66	Female	0.696137
8	66	Male	0.715183
8	67	Female	0.694747
8	67	Male	0.713566
8	68	Female	0.693359
8	68	Male	0.711947
8	69	Female	0.691973
8	69	Male	0.710326
8	70	Female	0.690589
8	70	Male	0.708704
8	71	Female	0.689207
8	71	Male	0.707079
8	72	Female	0.687827
8	72	Male	0.705453
8	73	Female	0.68645
8	73	Male	0.703825
8	74	Female	0.685075
8	74	Male	0.702196
8	75	Female	0.683703
8	75	Male	0.700566
8	76	Female	0.682333
8	76	Male	0.698935
8	77	Female	0.680965
8	77	Male	0.697303
8	78	Female	0.679601
8	78	Male	0.695671
8	79	Female	0.678239
8	79	Male	0.694038
8	80	Female	0.676881
8	80	Male	0.692404
8	81	Female	0.675525
8	81	Male	0.690771
8	82	Female	0.674172
8	82	Male	0.689137
8	83	Female	0.672822
8	83	Male	0.687504
8	84	Female	0.671476
8	84	Male	0.685871
8	85	Female	0.670133
8	85	Male	0.684238
8	86	Female	0.668793
8	86	Male	0.682605
8	87	Female	0.667456
8	87	Male	0.680974
8	88	Female	0.666123
8	88	Male	0.679343
8	89	Female	0.664793
8	89	Male	0.677713
8	90	Female	0.663467
8	90	Male	0.676085
8	91	Female	0.662145
8	91	Male	0.674458
8	92	Female	0.660826
8	92	Male	0.672832
8	93	Female	0.659511
8	93	Male	0.671207
8	94	Female	0.658199
8	94	Male	0.669585
8	95	Female	0.656892
8	95	Male	0.667964
8	96	Female	0.655588
8	96	Male	0.666345
8	97	Female	0.654288
8	97	Male	0.664729
8	98	Female	0.652992
8	98	Male	0.663114
8	99	Female	0.6517
8	99	Male	0.661502
9	18	Female	0.75191
9	18	Male	0.777264
9	19	Female	0.75058
9	19	Male	0.775948
9	20	Female	0.749246
9	20	Male	0.774625
9	21	Female	0.747909
9	21	Male	0.773294
9	22	Female	0.746569
9	22	Male	0.771956
9	23	Female	0.745226
9	23	Male	0.77061
9	24	Female	0.743879
9	24	Male	0.769257
9	25	Female	0.74253
9	25	Male	0.767897
9	26	Female	0.741179
9	26	Male	0.766531
9	27	Female	0.739824
9	27	Male	0.765157
9	28	Female	0.738467
9	28	Male	0.763776
9	29	Female	0.737108
9	29	Male	0.762389
9	30	Female	0.735747
9	30	Male	0.760995
9	31	Female	0.734383
9	31	Male	0.759595
9	32	Female	0.733017
9	32	Male	0.758188
9	33	Female	0.73165
9	33	Male	0.756775
9	34	Female	0.73028
9	34	Male	0.755356
9	35	Female	0.728909
9	35	Male	0.75393
9	36	Female	0.727537
9	36	Male	0.752499
9	37	Female	0.726162
9	37	Male	0.751062
9	38	Female	0.724787
9	38	Male	0.749619
9	39	Female	0.72341
9	39	Male	0.74817
9	40	Female	0.722033
9	40	Male	0.746716
9	41	Female	0.720654
9	41	Male	0.745257
9	42	Female	0.719274
9	42	Male	0.743792
9	43	Female	0.717894
9	43	Male	0.742322
9	44	Female	0.716513
9	44	Male	0.740847
9	45	Female	0.715131
9	45	Male	0.739367
9	46	Female	0.713749
9	46	Male	0.737882
9	47	Female	0.712367
9	47	Male	0.736393
9	48	Female	0.710984
9	48	Male	0.734899
9	49	Female	0.709601
9	49	Male	0.7334
9	50	Female	0.708218
9	50	Male	0.731898
9	51	Female	0.706836
9	51	Male	0.730391
9	52	Female	0.705453
9	52	Male	0.72888
9	53	Female	0.704071
9	53	Male	0.727366
9	54	Female	0.702689
9	54	Male	0.725847
9	55	Female	0.701308
9	55	Male	0.724325
9	56	Female	0.699927
9	56	Male	0.7228
9	57	Female	0.698547
9	57	Male	0.721271
9	58	Female	0.697168
9	58	Male	0.719739
9	59	Female	0.69579
9	59	Male	0.718204
9	60	Female	0.694412
9	60	Male	0.716665
9	61	Female	0.693036
9	61	Male	0.715125
9	62	Female	0.691661
9	62	Male	0.713581
9	63	Female	0.690287
9	63	Male	0.712035
9	64	Female	0.688914
9	64	Male	0.710487
9	65	Female	0.687543
9	65	Male	0.708936
9	66	Female	0.686174
9	66	Male	0.707384
9	67	Female	0.684806
9	67	Male	0.705829
9	68	Female	0.683439
9	68	Male	0.704273
9	69	Female	0.682075
9	69	Male	0.702715
9	70	Female	0.680712
9	70	Male	0.701155
9	71	Female	0.679351
9	71	Male	0.699594
9	72	Female	0.677992
9	72	Male	0.698032
9	73	Female	0.676635
9	73	Male	0.696469
9	74	Female	0.67528
9	74	Male	0.694904
9	75	Female	0.673928
9	75	Male	0.693339
9	76	Female	0.672577
9	76	Male	0.691773
9	77	Female	0.671229
9	77	Male	0.690207
9	78	Female	0.669884
9	78	Male	0.68864
9	79	Female	0.668541
9	79	Male	0.687074
9	80	Female	0.6672
9	80	Male	0.685506
9	81	Female	0.665862
9	81	Male	0.683939
9	82	Female	0.664527
9	82	Male	0.682373
9	83	Female	0.663194
9	83	Male	0.680806
9	84	Female	0.661864
9	84	Male	0.67924
9	85	Female	0.660537
9	85	Male	0.677674
9	86	Female	0.659212
9	86	Male	0.676109
9	87	Female	0.657891
9	87	Male	0.674545
9	88	Female	0.656572
9	88	Male	0.672982
9	89	Female	0.655256
9	89	Male	0.67142
9	90	Female	0.653944
9	90	Male	0.669859
9	91	Female	0.652634
9	91	Male	0.668299
9	92	Female	0.651328
9	92	Male	0.666741
9	93	Female	0.650025
9	93	Male	0.665184
9	94	Female	0.648724
9	94	Male	0.663629
9	95	Female	0.647427
9	95	Male	0.662076
9	96	Female	0.646134
9	96	Male	0.660525
9	97	Female	0.644843
9	97	Male	0.658976
9	98	Female	0.643556
9	98	Male	0.657429
9	99	Female	0.642272
9	99	Male	0.655884
10	18	Female	0.740582
10	18	Male	0.768008
10	19	Female	0.73924
10	19	Male	0.766701
10	20	Female	0.737894
10	20	Male	0.765387
10	21	Female	0.736545
10	21	Male	0.764066
10	22	Female	0.735194
10	22	Male	0.762738
10	23	Female	0.733839
10	23	Male	0.761403
10	24	Female	0.732482
10	24	Male	0.760061
10	25	Female	0.731122
10	25	Male	0.758713
10	26	Female	0.72976
10	26	Male	0.757358
10	27	Female	0.728395
10	27	Male	0.755996
10	28	Female	0.727028
10	28	Male	0.754628
10	29	Female	0.725659
10	29	Male	0.753254
10	30	Female	0.724287
10	30	Male	0.751873
10	31	Female	0.722914
10	31	Male	0.750487
10	32	Female	0.721539
10	32	Male	0.749094
10	33	Female	0.720162
10	33	Male	0.747695
10	34	Female	0.718784
10	34	Male	0.746291
10	35	Female	0.717404
10	35	Male	0.744881
10	36	Female	0.716022
10	36	Male	0.743465
10	37	Female	0.71464
10	37	Male	0.742044
10	38	Female	0.713256
10	38	Male	0.740617
10	39	Female	0.711871
10	39	Male	0.739185
10	40	Female	0.710485
10	40	Male	0.737748
10	41	Female	0.709098
10	41	Male	0.736306
10	42	Female	0.707711
10	42	Male	0.734859
10	43	Female	0.706322
10	43	Male	0.733407
10	44	Female	0.704934
10	44	Male	0.731951
10	45	Female	0.703544
10	45	Male	0.73049
10	46	Female	0.702155
10	46	Male	0.729024
10	47	Female	0.700765
10	47	Male	0.727554
10	48	Female	0.699375
10	48	Male	0.72608
10	49	Female	0.697985
10	49	Male	0.724602
10	50	Female	0.696594
10	50	Male	0.72312
10	51	Female	0.695205
10	51	Male	0.721634
10	52	Female	0.693815
10	52	Male	0.720145
10	53	Female	0.692425
10	53	Male	0.718652
10	54	Female	0.691036
10	54	Male	0.717155
10	55	Female	0.689648
10	55	Male	0.715655
10	56	Female	0.68826
10	56	Male	0.714152
10	57	Female	0.686873
10	57	Male	0.712646
10	58	Female	0.685486
10	58	Male	0.711137
10	59	Female	0.6841
10	59	Male	0.709626
10	60	Female	0.682715
10	60	Male	0.708111
10	61	Female	0.681332
10	61	Male	0.706594
10	62	Female	0.679949
10	62	Male	0.705075
10	63	Female	0.678567
10	63	Male	0.703554
10	64	Female	0.677187
10	64	Male	0.70203
10	65	Female	0.675808
10	65	Male	0.700505
10	66	Female	0.674431
10	66	Male	0.698977
10	67	Female	0.673054
10	67	Male	0.697448
10	68	Female	0.67168
10	68	Male	0.695918
10	69	Female	0.670307
10	69	Male	0.694385
10	70	Female	0.668935
10	70	Male	0.692852
10	71	Female	0.667566
10	71	Male	0.691317
10	72	Female	0.666198
10	72	Male	0.689782
10	73	Female	0.664832
10	73	Male	0.688245
10	74	Female	0.663468
10	74	Male	0.686708
10	75	Female	0.662106
10	75	Male	0.68517
10	76	Female	0.660746
10	76	Male	0.683631
10	77	Female	0.659388
10	77	Male	0.682092
10	78	Female	0.658032
10	78	Male	0.680553
10	79	Female	0.656678
10	79	Male	0.679014
10	80	Female	0.655327
10	80	Male	0.677474
10	81	Female	0.653978
10	81	Male	0.675935
10	82	Female	0.652631
10	82	Male	0.674396
10	83	Female	0.651287
10	83	Male	0.672857
10	84	Female	0.649945
10	84	Male	0.671319
10	85	Female	0.648605
10	85	Male	0.669782
10	86	Female	0.647268
10	86	Male	0.668245
10	87	Female	0.645934
10	87	Male	0.666709
10	88	Female	0.644602
10	88	Male	0.665173
10	89	Female	0.643272
10	89	Male	0.663639
10	90	Female	0.641946
10	90	Male	0.662106
10	91	Female	0.640622
10	91	Male	0.660575
10	92	Female	0.639301
10	92	Male	0.659044
10	93	Female	0.637982
10	93	Male	0.657516
10	94	Female	0.636666
10	94	Male	0.655988
10	95	Female	0.635354
10	95	Male	0.654463
10	96	Female	0.634043
10	96	Male	0.652939
10	97	Female	0.632736
10	97	Male	0.651417
10	98	Female	0.631432
10	98	Male	0.649898
10	99	Female	0.63013
10	99	Male	0.64838
11	18	Female	0.727969
11	18	Male	0.758456
11	19	Female	0.72659
11	19	Male	0.75713
11	20	Female	0.725208
11	20	Male	0.755797
11	21	Female	0.723823
11	21	Male	0.754457
11	22	Female	0.722436
11	22	Male	0.753111
11	23	Female	0.721045
11	23	Male	0.751758
11	24	Female	0.719653
11	24	Male	0.750398
11	25	Female	0.718258
11	25	Male	0.749032
11	26	Female	0.71686
11	26	Male	0.747659
11	27	Female	0.715461
11	27	Male	0.74628
11	28	Female	0.71406
11	28	Male	0.744895
11	29	Female	0.712656
11	29	Male	0.743503
11	30	Female	0.711251
11	30	Male	0.742106
11	31	Female	0.709845
11	31	Male	0.740703
11	32	Female	0.708436
11	32	Male	0.739294
11	33	Female	0.707026
11	33	Male	0.737879
11	34	Female	0.705615
11	34	Male	0.736459
11	35	Female	0.704203
11	35	Male	0.735033
11	36	Female	0.702789
11	36	Male	0.733602
11	37	Female	0.701374
11	37	Male	0.732166
11	38	Female	0.699959
11	38	Male	0.730724
11	39	Female	0.698542
11	39	Male	0.729278
11	40	Female	0.697125
11	40	Male	0.727827
11	41	Female	0.695707
11	41	Male	0.72637
11	42	Female	0.694288
11	42	Male	0.72491
11	43	Female	0.692869
11	43	Male	0.723444
11	44	Female	0.69145
11	44	Male	0.721975
11	45	Female	0.690031
11	45	Male	0.720501
11	46	Female	0.688611
11	46	Male	0.719022
11	47	Female	0.687191
11	47	Male	0.71754
11	48	Female	0.685771
11	48	Male	0.716054
11	49	Female	0.684352
11	49	Male	0.714564
11	50	Female	0.682932
11	50	Male	0.713071
11	51	Female	0.681513
11	51	Male	0.711574
11	52	Female	0.680094
11	52	Male	0.710073
11	53	Female	0.678676
11	53	Male	0.708569
11	54	Female	0.677258
11	54	Male	0.707063
11	55	Female	0.675841
11	55	Male	0.705553
11	56	Female	0.674424
11	56	Male	0.70404
11	57	Female	0.673008
11	57	Male	0.702524
11	58	Female	0.671594
11	58	Male	0.701006
11	59	Female	0.67018
11	59	Male	0.699486
11	60	Female	0.668767
11	60	Male	0.697963
11	61	Female	0.667355
11	61	Male	0.696437
11	62	Female	0.665944
11	62	Male	0.69491
11	63	Female	0.664535
11	63	Male	0.693381
11	64	Female	0.663127
11	64	Male	0.69185
11	65	Female	0.66172
11	65	Male	0.690317
11	66	Female	0.660314
11	66	Male	0.688783
11	67	Female	0.658911
11	67	Male	0.687247
11	68	Female	0.657508
11	68	Male	0.685709
11	69	Female	0.656107
11	69	Male	0.684171
11	70	Female	0.654708
11	70	Male	0.682632
11	71	Female	0.653311
11	71	Male	0.681091
11	72	Female	0.651915
11	72	Male	0.67955
11	73	Female	0.650522
11	73	Male	0.678008
11	74	Female	0.64913
11	74	Male	0.676466
11	75	Female	0.64774
11	75	Male	0.674923
11	76	Female	0.646352
11	76	Male	0.673379
11	77	Female	0.644966
11	77	Male	0.671836
11	78	Female	0.643582
11	78	Male	0.670292
11	79	Female	0.6422
11	79	Male	0.668749
11	80	Female	0.640821
11	80	Male	0.667205
11	81	Female	0.639443
11	81	Male	0.665662
11	82	Female	0.638068
11	82	Male	0.664119
11	83	Female	0.636695
11	83	Male	0.662577
11	84	Female	0.635324
11	84	Male	0.661035
11	85	Female	0.633956
11	85	Male	0.659494
11	86	Female	0.63259
11	86	Male	0.657954
11	87	Female	0.631227
11	87	Male	0.656415
11	88	Female	0.629866
11	88	Male	0.654877
11	89	Female	0.628507
11	89	Male	0.653339
11	90	Female	0.627151
11	90	Male	0.651804
11	91	Female	0.625797
11	91	Male	0.650269
11	92	Female	0.624446
11	92	Male	0.648736
11	93	Female	0.623098
11	93	Male	0.647204
11	94	Female	0.621752
11	94	Male	0.645674
11	95	Female	0.620408
11	95	Male	0.644146
11	96	Female	0.619068
11	96	Male	0.642619
11	97	Female	0.617729
11	97	Male	0.641094
11	98	Female	0.616394
11	98	Male	0.639572
11	99	Female	0.615061
11	99	Male	0.638051
12	18	Female	0.713439
12	18	Male	0.74764
12	19	Female	0.712006
12	19	Male	0.746267
12	20	Female	0.71057
12	20	Male	0.744887
12	21	Female	0.709131
12	21	Male	0.743501
12	22	Female	0.707691
12	22	Male	0.742108
12	23	Female	0.706248
12	23	Male	0.740709
12	24	Female	0.704803
12	24	Male	0.739303
12	25	Female	0.703357
12	25	Male	0.737891
12	26	Female	0.701908
12	26	Male	0.736473
12	27	Female	0.700458
12	27	Male	0.735048
12	28	Female	0.699006
12	28	Male	0.733618
12	29	Female	0.697553
12	29	Male	0.732182
12	30	Female	0.696099
12	30	Male	0.73074
12	31	Female	0.694643
12	31	Male	0.729292
12	32	Female	0.693186
12	32	Male	0.727839
12	33	Female	0.691728
[truncated: 99,025 more rows]

[truncated: 4 more sheets: G-C, PG-C, A-U, B-U]
